# Supplementary material for: In-depth Proteomic Profiling Captures Subtype-specific Features of Craniopharyngiomas
Source: Research Square preprint supplement (doi:10.21203/rs.3.rs-666783/v1), 2021-07-07
Supplement: Supplementary file 1 [file 9adc534476712934923f526e.xlsx]

## Sheet: Supplementary Table 2
Supplementary Table 2. Total identified protein list of label-free quantification set
No.	Protein IDs	Majority protein IDs	Protein names	Gene names	Log2 (iBAQ_ACP1)	Log2 (iBAQ_ACP2)	Log2 (iBAQ_ACP3)	Log2 (iBAQ_ACP4)	Log2 (iBAQ_ACP5)	Log2 (iBAQ_ACP6)	Log2 (iBAQ_PCP1)	Log2 (iBAQ_PCP2)	Log2 (iBAQ_PCP3)	Log2 (iBAQ_PCP4)	Log2 (iBAQ_PCP5)	Peptides	Razor + unique peptides	Unique peptides	Sequence coverage [%]	Unique + razor sequence coverage [%]	Unique sequence coverage [%]	Mol. weight [kDa]	Q-value	Score	Intensity	MS/MS count
1	A0A024QZX5;A0A087X1N8;P35237;C9JTJ8	A0A024QZX5;A0A087X1N8;P35237	Serpin B6	SERPINB6	24.1935	21.9159	23.5286	21.1311	23.2303	24.4735	23.9068	21.8144	22.9765	22.8679	22.8176	12	12	11	41.3	41.3	39.2	43.024	0	64.586	2918700000	85
2	A0A024R0K5;P06731-2;P06731;A0A087X013;A0A087WYX0;M0QX98;M0QXV9;T2HUW8;M0R3J1	A0A024R0K5;P06731-2;P06731;A0A087X013;A0A087WYX0;M0QX98;M0QXV9;T2HUW8	Carcinoembryonic antigen-related cell adhesion molecule 5	CEACAM5	NaN	NaN	NaN	19.1714	NaN	NaN	NaN	NaN	18.8084	18.1791	NaN	5	4	3	9.5	8.3	6.3	76.795	0	12.173	61663000	4
3	A0A087WZA9;A0A024R4K9;A0A087X266;Q9BXJ8-2;Q9BXJ8	A0A087WZA9;A0A024R4K9;A0A087X266;Q9BXJ8-2;Q9BXJ8	Transmembrane protein 120A	TMEM120A;TMPIT	21.2271	NaN	19.2693	NaN	19.6866	NaN	20.4596	20.2934	19.0693	19.9464	20.0657	2	2	2	12.1	12.1	12.1	20.459	0.0036743	2.7545	151670000	4
4	A0A024R7W5;A0A087X0Q1;A0A087WY31;Q7Z739;Q9Y5A9-2	A0A024R7W5;A0A087X0Q1;A0A087WY31;Q7Z739;Q9Y5A9-2	YTH domain-containing family protein 3;YTH domain-containing family protein 2	YTHDF3;YTHDF2	21.6337	22.7136	22.1086	17.4315	22.3774	20.8289	20.9796	20.4447	20.3175	20.8671	19.554	5	5	0	9	9	0	58.311	0	8.576	724520000	19
5	A0A075B6E5;Q8N8S7-3;Q8N8S7-2;Q8N8S7	A0A075B6E5;Q8N8S7-3;Q8N8S7-2;Q8N8S7	Protein enabled homolog	ENAH	23.6889	23.2933	21.9574	22.2085	22.8666	22.0942	22.4469	21.4501	20.6061	21.97	23.377	6	6	6	33.3	33.3	33.3	24.92	0	25.232	938760000	19
6	A0A087WV90;E9PDN5;A0A087WTU7;A0A075B6G3;P11532-4;P11532;P11532-3;P11532-2;H0Y304;F5GZY3;E7EQS5;F8VX32;E7ESB2;E7EQR9;Q4G0X0;H0Y3E8;Q14174	A0A087WV90;E9PDN5;A0A087WTU7;A0A075B6G3;P11532-4;P11532;P11532-3;P11532-2;H0Y304;F5GZY3;E7EQS5;F8VX32;E7ESB2	Dystrophin	DMD	20.9468	18.8742	17.2372	18.3405	17.7336	19.8429	16.8733	17.6168	16.9054	18.0619	17.5353	23	21	14	7.3	6.8	4.6	426.09	0	41.926	1245400000	39
7	A0A075B6I2	A0A075B6I2		IGLV6-57	23.724	NaN	23.2525	NaN	21.701	24.1872	24.8199	23.7255	23.1161	23.3189	25.1015	1	1	1	10.1	10.1	10.1	15.949	0.0097052	2.1628	1106900000	12
8	A0A075B6I8;P04208;P01700	A0A075B6I8;P04208;P01700	Ig lambda chain V-I region WAH;Ig lambda chain V-I region HA	IGLV1-47	20.2807	22.1523	NaN	NaN	20.3544	NaN	23.246	NaN	19.0471	22.6488	19.809	2	2	2	24.8	24.8	24.8	12.283	0	5.1144	126300000	3
9	A0A075B6J4;A0A075B6J3	A0A075B6J4;A0A075B6J3		IGLV3-25;IGLV3-27	NaN	24.1118	20.6096	NaN	20.4927	NaN	24.791	NaN	NaN	23.2614	NaN	2	2	1	19.6	19.6	9.8	12.011	0.00042265	3.82	278050000	4
10	A0A075B6L0;A0A075B6K9;P0CG06;P0CG05;P0CF74;A0A075B6L1;A0M8Q6	A0A075B6L0;A0A075B6K9;P0CG06;P0CG05;P0CF74	Ig lambda-3 chain C regions;Ig lambda-2 chain C regions;Ig lambda-6 chain C region	IGLC3;IGLC2;IGLC6	23.7197	25.5226	23.9083	23.5914	23.9825	23.7543	26.1027	20.2797	22.172	25.2683	23.9545	6	2	2	82.1	27.4	27.4	11.208	0	98.713	2242200000	58
11	A0A075B6N7	A0A075B6N7		IGHA2	NaN	NaN	22.1978	16.9735	16.9868	NaN	21.1107	18.1363	NaN	18.0849	19.9415	12	4	4	57.1	14.4	14.4	36.591	0	13.903	227570000	12
12	A0A087WW49;A0A075B6R2;A0A087WSY4;P01825;P06331	A0A087WW49;A0A075B6R2;A0A087WSY4;P01825;P06331	Ig heavy chain V-II region NEWM;Ig heavy chain V-II region ARH-77	IGHV4-4;IGHV4-31	NaN	NaN	NaN	NaN	NaN	NaN	NaN	NaN	NaN	NaN	NaN	2	1	1	18.8	13.7	13.7	12.944	0.0027376	2.8871	0	1
13	A0A075B6R9	A0A075B6R9		IGKV2D-24	NaN	NaN	NaN	NaN	NaN	NaN	22.7444	NaN	NaN	20.5491	20.053	2	1	1	16.7	10.8	10.8	13.079	0.003483	2.7636	48244000	1
14	A0A075B730	A0A075B730		EPPK1	20.288	22.2236	18.8205	23.4124	17.0165	17.1987	21.336	20.8843	21.8262	22.6906	19.5832	97	89	1	50.7	43.3	0.3	553.12	0	323.31	10578000000	342
15	A0A075B738;P16284-5;P16284-3;P16284-4;P16284-2;P16284-6;P16284;A0A075B727;A0A075B728;A0A075B737	A0A075B738;P16284-5;P16284-3;P16284-4;P16284-2;P16284-6;P16284	Platelet endothelial cell adhesion molecule	PECAM1	20.4842	19.1372	20.6712	19.1939	21.4474	19.4723	21.1036	20.8927	20.0768	19.7772	21.0695	15	15	15	25.2	25.2	25.2	82.521	0	68.881	1391500000	53
16	A0A087WVF8;A0A087WX83;A0A075B749;Q5VU43-3;Q5VU43;Q5VU43-4;A0A087WWK4;A0A087WWY1;A0A087WWI2;A0A087X041;A0A087WVQ4;E9PQG4;Q5VU43-12;Q5VU43-8;Q5VU43-9;Q5VU43-6;Q5VU43-7;A0A087X229;A0A087X0I1;REV__Q8N4Y2	A0A087WVF8;A0A087WX83;A0A075B749;Q5VU43-3;Q5VU43;Q5VU43-4	Myomegalin	PDE4DIP	18.7993	15.813	19.316	20.395	19.0896	18.4007	19.0947	NaN	19.1062	18.2156	18.1264	8	8	4	4.5	4.5	2.2	254.07	0	17.625	801950000	22
17	A0A075B785;Q9P260;Q9P260-2;A0A075B768	A0A075B785;Q9P260;Q9P260-2;A0A075B768	LisH domain and HEAT repeat-containing protein KIAA1468	KIAA1468	16.5128	NaN	NaN	NaN	16.3937	NaN	NaN	15.9653	NaN	NaN	16.6475	2	2	2	2.8	2.8	2.8	112.8	0.00022168	4.4775	21485000	4
18	A0A075B793;Q4V328-4;Q4V328;A0A087WT45;A0A087WW92;Q4V328-2;A0A087WV84;A0A087WZF5;Q4V328-3	A0A075B793;Q4V328-4;Q4V328;A0A087WT45	GRIP1-associated protein 1	GRIPAP1	15.2124	NaN	18.5729	NaN	18.396	NaN	16.3911	16.8478	NaN	NaN	NaN	8	8	8	11	11	11	92.753	0	10.988	55674000	8
19	A0A075B7B3;Q8NG66-2;Q8NG66-3;Q8NG66-4;Q8NG66	A0A075B7B3;Q8NG66-2;Q8NG66-3;Q8NG66-4;Q8NG66	Serine/threonine-protein kinase Nek11	NEK11	NaN	NaN	NaN	NaN	NaN	20.6185	NaN	NaN	NaN	NaN	NaN	1	1	1	5.5	5.5	5.5	25.12	0.0027392	2.8939	16099000	1
20	A0A075B7B8	A0A075B7B8		IGHV3OR16-12	20.1118	22.4629	20.191	20.5023	20.6568	NaN	22.6419	NaN	NaN	22.1229	NaN	2	1	1	18.8	9.4	9.4	12.874	0	7.7367	183820000	9
21	A0A075B7D9;Q92804-2;Q92804;A0A075B7F4	A0A075B7D9;Q92804-2;Q92804	TATA-binding protein-associated factor 2N	TAF15	23.0243	23.3494	22.9928	22.6353	23.9711	19.8574	22.3762	23.5274	21.9963	23.3893	22.7964	7	5	5	14.9	11.8	11.8	48.839	0	65.045	2006700000	44
22	V9GY97;A0A087X0V7;A0A087WYH9;A0A075B7G8;J3KPL8;O00213-4;O00213-6;O00213-3;O00213-5;O00213-2;O00213;V9GYD5;V9GYR7	V9GY97;A0A087X0V7;A0A087WYH9;A0A075B7G8;J3KPL8;O00213-4;O00213-6;O00213-3;O00213-5;O00213-2;O00213	Amyloid beta A4 precursor protein-binding family B member 1	APBB1	NaN	NaN	18.6406	NaN	NaN	19.2495	NaN	22.0301	NaN	22.644	NaN	3	3	3	16	16	16	29.25	0	5.1852	189900000	3
23	F6RVM3;A8MVE2;D9IDM5;A0A087WSX8;A0A087WSV6;F6TER3;Q8NHL6-5;Q8NHL6;Q8NHL6-4;Q8NHL6-2;Q8NHL6-3;A0A087WVJ8;I3L0E5;A0A096P6K9;O75019-2;O75019	F6RVM3;A8MVE2;D9IDM5;A0A087WSX8;A0A087WSV6;F6TER3;Q8NHL6-5;Q8NHL6;Q8NHL6-4;Q8NHL6-2;Q8NHL6-3;A0A087WVJ8;I3L0E5;A0A096P6K9;O75019-2;O75019	Leukocyte immunoglobulin-like receptor subfamily B member 1;Leukocyte immunoglobulin-like receptor subfamily A member 1	LILRB1;LILRA1	17.9995	NaN	NaN	NaN	NaN	NaN	18.162	NaN	NaN	17.3574	NaN	2	2	1	6.1	6.1	3.7	55.494	0.00022198	4.4984	34519000	1
24	V9HW75;A0A087WSV8;E9PKG6;P80303-2;P80303;Q2L696;E9PLR0;E9PLE9;H0YD18;E9PM22;H0YEG8;E9PJP3	V9HW75;A0A087WSV8;E9PKG6;P80303-2;P80303;Q2L696;E9PLR0;E9PLE9	Nucleobindin-2;Nesfatin-1	HEL-S-109;NUCB2;Nucb2	22.0515	21.0206	25.6907	21.0776	26.2025	19.2271	22.703	21.4991	21.8292	23.078	22.8995	16	16	16	44	44	44	50.222	0	188.75	4246400000	105
25	E9PIR7;F8W809;A0A087WSW9;E9PNQ6;A0A087WSY9;Q16881-5;Q16881-2;Q16881-4;Q16881-3;Q16881-6;Q16881;E2QRB9;Q16881-7;E9PKD3;E9PIZ5;E9PQI3;E9PLT3;E9PKI4	E9PIR7;F8W809;A0A087WSW9;E9PNQ6;A0A087WSY9;Q16881-5;Q16881-2;Q16881-4;Q16881-3;Q16881-6;Q16881;E2QRB9;Q16881-7;E9PKD3	Thioredoxin reductase 1, cytoplasmic	TXNRD1	21.9311	20.7747	22.6788	21.8996	22.1782	22.3597	19.8981	NaN	18.1669	19.3735	16.7857	6	6	6	15.6	15.6	15.6	53.166	0	33.83	829980000	19
26	A0A087WSX4	A0A087WSX4		IGHV3-53	24.0825	23.4777	25.4069	23.0406	25.0245	23.4516	24.5497	NaN	23.9888	23.4048	24.1458	3	2	1	22.4	22.4	22.4	12.769	0	6.4959	1440400000	5
27	A0A087WSY5;Q96IY4;Q96IY4-2;CON__Q2KIG3	A0A087WSY5;Q96IY4;Q96IY4-2	Carboxypeptidase B2	CPB2	20.5246	20.3775	20.8114	22.3688	20.6467	21.5081	19.5409	16.5203	17.5258	18.6331	NaN	4	4	4	9.8	9.8	9.8	44.022	0	8.7931	318930000	9
28	A0A087X2I2;A0A087WT12;P36969-2;P36969;K7ERP4;K7ENB4;K7EKX7;K7EJ20;R4GNE4;A0A087X247	A0A087X2I2;A0A087WT12;P36969-2;P36969;K7ERP4;K7ENB4;K7EKX7;K7EJ20;R4GNE4	Glutathione peroxidase;Phospholipid hydroperoxide glutathione peroxidase, mitochondrial	GPX4	21.8964	20.3813	23.2482	20.3677	23.3248	22.1547	22.0072	21.0505	21.4244	21.2167	21.1214	11	11	11	52	52	52	22.024	0	22.195	782310000	24
29	A0A087WT44;P30519-2;P30519;I3L159;I3L1F5;I3L276;I3L4P8;I3L463;I3L1Y2	A0A087WT44;P30519-2;P30519;I3L159;I3L1F5	Heme oxygenase 2	HMOX2	22.7165	21.9117	22.6453	22.0701	22.7524	21.0103	22.6046	22.4777	21.6765	22.4121	21.1628	7	7	7	23.5	23.5	23.5	41.669	0	37.127	1297700000	61
30	A0A087WT99;Q9H0W9-2;Q9H0W9;E9PJU8;E9PQS1;Q9H0W9-4;E9PPB5;Q9H0W9-3;E9PR95;E9PSC3;E9PLC5;E9PLB3;E9PIP1	A0A087WT99;Q9H0W9-2;Q9H0W9;E9PJU8;E9PQS1;Q9H0W9-4;E9PPB5;Q9H0W9-3	Ester hydrolase C11orf54	C11orf54	17.9291	21.8691	20.6826	20.7317	19.7017	21.3834	18.6946	NaN	19.4393	18.2339	NaN	5	5	5	27.3	27.3	27.3	28.683	0	10.584	191670000	11
31	A0A087WTA5;E7ERK9;Q9UI10-3;Q9UI10;Q9UI10-2;A0A087WW69;F8W8L6	A0A087WTA5;E7ERK9;Q9UI10-3;Q9UI10;Q9UI10-2	Translation initiation factor eIF-2B subunit delta	EIF2B4	18.8468	19.9877	20.8614	19.4849	20.3279	18.75	19.1217	19.5092	18.3206	18.7059	19.8405	5	5	5	14	14	14	57.495	0	10.058	255240000	21
32	A0A087WTA8;P08123	A0A087WTA8;P08123	Collagen alpha-2(I) chain	COL1A2	28.4069	25.8233	25.4954	24.0617	25.6933	27.2925	28.5814	29.0364	28.4161	27.4698	28.8522	28	28	28	27.9	27.9	27.9	129.15	0	323.31	264300000000	314
33	Q5T985;A0A087WTE1;P19823;Q5T987;CON__Q9TRI1	Q5T985;A0A087WTE1;P19823	Inter-alpha-trypsin inhibitor heavy chain H2	ITIH2	23.6047	23.1674	22.9822	23.6358	22.747	22.7231	24.7386	21.5471	21.3913	24.1638	23.3994	19	19	19	26.6	26.6	26.6	105.21	0	113.57	6746400000	164
34	D6RA00;A0A087WTH0;Q9UHY7	D6RA00;A0A087WTH0;Q9UHY7	Enolase-phosphatase E1	ENOPH1	19.8695	19.7136	19.7945	19.6186	19.8734	20.4364	19.1964	NaN	NaN	18.9976	NaN	1	1	1	6.9	6.9	6.9	19.187	0.0053111	2.5531	77392000	1
35	A0A087WTJ2;Q96F15;Q96F15-2	A0A087WTJ2;Q96F15;Q96F15-2	GTPase IMAP family member 5	GIMAP1-GIMAP5;GIMAP5	NaN	NaN	NaN	NaN	NaN	NaN	NaN	NaN	NaN	NaN	NaN	8	4	4	20.5	11.4	11.4	57.051	0	5.3885	20324000	5
36	A0A087WTK0;A0A087WVC6;Q12913;Q12913-2	A0A087WTK0;A0A087WVC6;Q12913	Protein-tyrosine-phosphatase;Receptor-type tyrosine-protein phosphatase eta	PTPRJ	19.0807	16.087	18.2007	15.4747	19.958	15.8296	18.7201	16.7348	18.153	17.2537	18.4942	7	7	7	9	9	9	146.07	0	19.566	277210000	17
37	A0A087WTN3;A0A087WVA1;P62341;Q6IAK0;F8WBD0	A0A087WTN3;A0A087WVA1;P62341;Q6IAK0	Selenoprotein T	SELT	23.4297	22.7665	22.5441	23.1896	23.487	22.4305	23.0364	22.8769	22.4235	22.6337	22.9642	4	4	4	34.6	34.6	34.6	18.826	0	13.88	866030000	16
38	A0A087WTP3;Q92945;M0R0I5;M0QYH3;M0QXW7;M0R3J3;M0QYG1;M0R0C6;M0R251;M0R263	A0A087WTP3;Q92945	Far upstream element-binding protein 2	KHSRP	22.5835	24.546	24.077	23.6827	24.234	20.8687	21.735	22.225	20.5967	21.6052	22.2952	20	20	19	41.8	41.8	39.8	73.027	0	323.31	4296100000	106
39	A0A087WTV1;Q9H1P3-2;Q9H1P3;E7ET92;H0Y7X4	A0A087WTV1;Q9H1P3-2;Q9H1P3;E7ET92	Oxysterol-binding protein-related protein 2;Oxysterol-binding protein	OSBPL2	NaN	NaN	18.4162	16.9624	17.7358	22.1756	NaN	NaN	16.0729	16.9199	17.424	4	4	4	29.4	29.4	29.4	20.362	0	8.0213	78082000	5
40	A0A087WTV6;Q96C36;A0A087WZR9;J3KR12	A0A087WTV6;Q96C36;A0A087WZR9;J3KR12	Pyrroline-5-carboxylate reductase 2;Pyrroline-5-carboxylate reductase	PYCR2	20.9735	20.1706	22.4689	20.9338	22.2485	19.2242	21.7879	21.2519	20.9842	20.9857	20.681	7	7	6	41.1	41.1	35.8	25.868	0	31.498	480500000	35
41	A2AAT0;A0A087WTX2;Q92504	A2AAT0;A0A087WTX2;Q92504	Zinc transporter SLC39A7	SLC39A7	19.4059	19.8355	19.9911	18.9149	NaN	NaN	NaN	NaN	19.5643	NaN	NaN	1	1	1	5.9	5.9	5.9	24.003	0.00022487	4.6951	27593000	1
42	A0A087WTZ5;E9PJ81;E9PRQ7;Q04323;Q04323-2	A0A087WTZ5;E9PJ81;E9PRQ7;Q04323;Q04323-2	UBX domain-containing protein 1	UBXN1	19.3678	21.0956	22.1769	NaN	22.3264	23.0939	19.3607	NaN	19.8696	20.4575	19.7731	4	4	4	22.7	22.7	22.7	27.015	0	162.58	343030000	16
43	A0A087WU02;Q96RQ1;F8W0R1;F8VPA6;F8VR88;F8VUZ2;H0YI50;H0YI58;H0YHJ8;F8VRW9	A0A087WU02;Q96RQ1;F8W0R1;F8VPA6;F8VR88;F8VUZ2;H0YI50	Endoplasmic reticulum-Golgi intermediate compartment protein 2	ERGIC2	19.7375	18.2061	20.7114	20.0817	20.7543	16.6615	20.1523	20.385	19.8552	19.3686	20.2241	6	6	6	18.7	18.7	18.7	43.432	0	9.8171	248430000	27
44	A0A087WU07;Q5TGZ0-2;Q5TGZ0;R4GMM1;R4GNA1	A0A087WU07;Q5TGZ0-2;Q5TGZ0;R4GMM1;R4GNA1	MICOS complex subunit MIC10	MINOS1;MINOS1-NBL1	25.6514	NaN	NaN	25.4876	24.7576	25.7703	25.5129	25.1107	25.7743	24.2616	25.6851	2	2	2	24.2	24.2	24.2	7.036	0.0016084	3.2118	911120000	7
45	Q13030;E9PH25;E7EQF3;E9PD10;A0A087WU29;P02724-3;P02724-2;P02724	Q13030;E9PH25;E7EQF3;E9PD10;A0A087WU29;P02724-3;P02724-2;P02724	Glycophorin-A	GPErik;GYPA	24.0325	NaN	NaN	21.3143	22.9812	NaN	NaN	21.24	NaN	NaN	21.4202	1	1	1	36.5	36.5	36.5	9.3318	0	5.534	121490000	7
46	A0A087WU31;P51790-4;P51790-5;P51790;E9PE15;P51790-2;G3XAG5;P51793-2;P51795;P51793;P51795-2	A0A087WU31;P51790-4;P51790-5;P51790;E9PE15;P51790-2	Chloride channel protein;H(+)/Cl(-) exchange transporter 3	CLCN3	18.7378	18.7143	20.6609	18.2955	21.0037	19.9093	16.2695	NaN	15.6792	18.395	19.0837	5	5	5	7.2	7.2	7.2	87.947	0	6.9988	262740000	16
47	A0A087WU33;A0A087WVV7;A0A087X165;Q9C0H9-2;Q9C0H9;Q9C0H9-5	A0A087WU33;A0A087WVV7;A0A087X165;Q9C0H9-2;Q9C0H9;Q9C0H9-5	SRC kinase signaling inhibitor 1	SRCIN1	NaN	NaN	NaN	NaN	NaN	NaN	NaN	NaN	NaN	NaN	NaN	1	1	1	4.2	4.2	4.2	51.259	0.0042129	2.6449	0	1
48	A0A087WU53;Q9H0U3;Q9H0U3-2	A0A087WU53;Q9H0U3	Magnesium transporter protein 1	MAGT1	23.3651	24.3391	22.9176	23.9675	23.056	22.2733	22.9638	23.6634	22.166	22.8218	23.0617	7	7	7	17.7	17.7	17.7	41.531	0	36.722	2632100000	43
49	A0A087WUA5;Q9H223	A0A087WUA5;Q9H223	EH domain-containing protein 4	EHD4	20.0128	20.5824	21.5948	20.5021	22.7327	21.789	22.0773	20.3294	20.2158	20.9831	20.1254	15	13	13	30	26.3	26.3	61.113	0	68.478	1090300000	32
50	A0A087WUB9;Q8WYA6-3;Q8WYA6-2;Q8WYA6-4;Q8WYA6	A0A087WUB9;Q8WYA6-3;Q8WYA6-2;Q8WYA6-4;Q8WYA6	Beta-catenin-like protein 1	CTNNBL1	16.1771	19.4743	20.1104	18.167	18.4138	18.1464	18.723	18.0907	18.5629	19.0033	18.3406	3	3	3	4.2	4.2	4.2	65.702	0.00022452	4.6502	146310000	27
51	A0A087WUC6;E9PI68;Q15005;E9PL01;E9PRB9;H0YE04	A0A087WUC6;E9PI68;Q15005;E9PL01;E9PRB9	Signal peptidase complex subunit 2	SPCS2	25.3526	23.7075	25.5925	24.2347	25.6982	24.2126	25.811	24.3988	24.9783	24.7403	24.2328	8	8	8	36.1	36.1	36.1	25.09	0	132.09	6081700000	122
52	A0A087WUD3;Q9NRP0;Q9NRP0-2	A0A087WUD3;Q9NRP0;Q9NRP0-2	Oligosaccharyltransferase complex subunit OSTC	OSTC	25.2214	24.8006	25.935	24.7377	25.8935	24.003	25.3824	25.1361	24.731	24.9991	25.4912	1	1	1	14.5	14.5	14.5	9.369	0	13.625	1543900000	30
53	A0A087WUF6;P09038-2;P09038-3;P09038-1;P09038	A0A087WUF6;P09038-2;P09038-3;P09038-1;P09038	Fibroblast growth factor;Fibroblast growth factor 2	FGF2	18.8689	22.2125	NaN	22.2488	19.6122	21.9082	NaN	NaN	NaN	NaN	NaN	3	3	3	9.7	9.7	9.7	30.752	0	17.742	293700000	9
54	J3QTS8;A0A087WUI4;A0A087X1U0;Q15661-2;Q15661;P20231;Q9BZJ3-2;Q9BZJ3;A6NIE9;P05981	J3QTS8;A0A087WUI4;A0A087X1U0;Q15661-2;Q15661;P20231	Tryptase alpha/beta-1;Tryptase beta-2	TPSAB1;TPSB2	25.9499	23.9236	25.4707	23.9532	23.9164	25.1286	27.2754	22.9715	24.2102	21.0313	21.9593	11	11	11	35.1	35.1	35.1	31.282	0	111.22	7044400000	136
55	E9PG46;A0A087WUK0;Q2M2I8-2;Q2M2I8	E9PG46;A0A087WUK0;Q2M2I8-2;Q2M2I8	AP2-associated protein kinase 1	AAK1	20.2645	18.8147	22.0111	16.888	21.9049	16.8799	20.3784	21.0019	19.9445	20.6055	21.1983	10	10	10	22	22	22	73.769	0	44.876	626070000	27
56	A0A087WUK2;O14979	A0A087WUK2;O14979	Heterogeneous nuclear ribonucleoprotein D-like	HNRNPDL	23.4347	24.1587	23.8573	23.9033	24.5461	21.8814	21.7257	23.2581	21.1889	22.3688	21.9847	12	11	2	31.4	29.2	9.4	40.04	0	85.799	2909700000	95
57	A0A087WUL0;Q3LXA3;H0YCY6;Q3LXA3-2;I3L252	A0A087WUL0;Q3LXA3;H0YCY6;Q3LXA3-2;I3L252	Bifunctional ATP-dependent dihydroxyacetone kinase/FAD-AMP lyase (cyclizing);ATP-dependent dihydroxyacetone kinase;FAD-AMP lyase (cyclizing)	TKFC;DAK	17.1323	20.3766	19.1337	19.6165	19.0243	20.0674	19.14	NaN	NaN	19.5136	NaN	6	6	6	11.5	11.5	11.5	59.057	0	11.478	192790000	16
58	A0A087WZG9;A0A087WXK2;A0A087WUL4;A0A087WX23;Q86TG7-2;Q86TG7	A0A087WZG9;A0A087WXK2;A0A087WUL4;A0A087WX23;Q86TG7-2;Q86TG7	Retrotransposon-derived protein PEG10	PEG10	NaN	NaN	20.4595	NaN	20.2851	NaN	NaN	NaN	NaN	NaN	NaN	2	2	2	8.9	8.9	8.9	40.471	0.00042472	3.8731	46232000	2
59	A0A087WUM0;P57105	A0A087WUM0;P57105	Synaptojanin-2-binding protein	SYNJ2BP-COX16;SYNJ2BP	23.4858	21.4861	22.725	22.5151	23.4918	23.266	23.2262	23.3098	23.1353	21.7646	23.2307	4	4	1	22.6	22.6	5.9	20.774	0	11.136	1096400000	35
60	A0A087WUN7;H0YJ40;G3V4X6;G3V2S9;Q9GZT3-2;Q9GZT3;H0YJ07;H0YJI1	A0A087WUN7;H0YJ40;G3V4X6;G3V2S9;Q9GZT3-2;Q9GZT3	SRA stem-loop-interacting RNA-binding protein, mitochondrial	SLIRP	25.2201	24.628	25.0954	24.2636	24.9227	22.8539	24.7021	25.4663	24.1216	24.2729	24.6142	5	5	1	63	63	10.9	10.353	0	66.336	2781200000	46
61	A0A087WUQ6;P07203;P07203-2	A0A087WUQ6;P07203	Glutathione peroxidase;Glutathione peroxidase 1	GPX1	25.4861	24.4418	23.4527	24.2122	22.8701	23.4022	25.8935	25.3945	25.8314	25.0413	24.6697	13	13	13	76.7	76.7	76.7	21.938	0	91.934	4849500000	127
62	E7ETK0;A0A087WUS0;P62847-2;P62847-3;P62847;P62847-4	E7ETK0;A0A087WUS0;P62847-2;P62847-3;P62847;P62847-4	40S ribosomal protein S24	RPS24	24.7289	25.6198	24.9444	24.7796	25.2034	23.4447	22.5479	24.7841	22.628	25.0504	24.1404	4	4	4	35.1	35.1	35.1	15.197	0	39.128	2113900000	90
63	A0A087WUS7;P01880;P01880-2	A0A087WUS7;P01880;P01880-2	Ig delta chain C region	IGHD	21.0261	NaN	17.7303	18.4148	NaN	19.0471	NaN	NaN	NaN	NaN	NaN	3	3	3	15.9	15.9	15.9	42.352	0	17.233	79621000	9
64	A0A087WUT6;O60841	A0A087WUT6;O60841	Eukaryotic translation initiation factor 5B	EIF5B	19.3375	20.3084	20.2176	18.9629	19.7328	17.092	18.7467	18.8042	18.6948	20.0824	18.7008	9	9	9	9.9	9.9	9.9	138.68	0	20.261	491170000	30
65	A0A087X0G7;A0A087WUW6;A0A087X1B1;Q9Y6K9;Q9Y6K9-2;A0A087WV30;C9JN51;C9J2V2;C9JH59;Q9Y6K9-3	A0A087X0G7;A0A087WUW6;A0A087X1B1;Q9Y6K9;Q9Y6K9-2;A0A087WV30;C9JN51;C9J2V2	NF-kappa-B essential modulator	IKBKG	18.3643	NaN	17.6963	NaN	17.751	19.9428	20.0387	19.3207	18.5806	18.8962	20.2421	4	4	4	13.4	13.4	13.4	47.256	0	13.92	223070000	6
66	A0A087WUW9;Q9NXU5;R4GN67	A0A087WUW9;Q9NXU5	ADP-ribosylation factor-like protein 15	ARL15	21.8963	23.0176	22.497	22.0323	22.7182	18.9406	19.9781	21.8667	19.665	19.1017	20.532	4	4	4	27	27	27	22.876	0	10.286	557520000	16
67	A0A087WV05;Q99417	A0A087WV05;Q99417	C-Myc-binding protein	MYCBP	21.2838	21.2758	23.3777	20.9548	23.0855	NaN	21.0427	NaN	NaN	21.6175	20.4312	4	4	4	52.7	52.7	52.7	12.755	0	15.683	279650000	13
68	A0A087WV15;Q16787;Q16787-3;K7EIP4;K7ERM0;A0A075B783;K7EPP3	A0A087WV15;Q16787;Q16787-3;K7EIP4	Laminin subunit alpha-3	LAMA3	23.1975	23.2646	20.8453	26.7419	18.5327	20.7565	23.8786	21.8724	22.2657	23.0475	24.2014	74	72	5	27.8	27.2	2.6	366.93	0	323.31	37305000000	748
69	A0A087WV21;Q9NP70-2;Q9NP70	A0A087WV21;Q9NP70-2;Q9NP70	Ameloblastin	AMBN	NaN	NaN	NaN	25.3914	NaN	20.7145	NaN	NaN	NaN	NaN	NaN	7	7	7	20.6	20.6	20.6	48.284	0	60.515	640280000	9
70	Q5T123;A0A087WV23;Q9H299	Q5T123;A0A087WV23;Q9H299	SH3 domain-binding glutamic acid-rich-like protein 3	SH3BGRL3	23.7883	24.2465	21.3776	23.2117	23.0493	22.938	24.6327	23.6563	24.3283	25.1293	23.8203	4	4	4	34.1	34.1	34.1	9.3804	0	15.77	1123600000	23
71	A0A087WV34;Q8WWB7-2;Q8WWB7	A0A087WV34;Q8WWB7-2;Q8WWB7	Glycosylated lysosomal membrane protein	GLMP	20.051	20.1898	NaN	20.2128	NaN	19.7383	NaN	19.7391	NaN	20.3576	20.6847	1	1	1	8.1	8.1	8.1	34.576	0.00082474	3.4838	93070000	10
72	A0A087WV46;C9JXA7;Q0VGL1;A0A087X1E5;A0A087WT92	A0A087WV46;C9JXA7;Q0VGL1;A0A087X1E5;A0A087WT92	Ragulator complex protein LAMTOR4;Ragulator complex protein LAMTOR4, N-terminally processed	LAMTOR4	23.9143	23.3889	24.1323	23.1028	24.0193	22.1957	24.0448	NaN	24.3303	23.8808	23.2826	2	2	2	20.7	20.7	20.7	8.8779	0.0042146	2.6457	454890000	4
73	A0A087WV47;A0A087X010;P01857	A0A087WV47;A0A087X010;P01857	Ig gamma-1 chain C region	IGHG1	28.6833	29.3807	28.826	28.3397	28.7274	27.6678	29.8142	24.856	27.0581	29.1833	27.8858	22	22	2	55.4	55.4	3.4	51.153	0	323.31	108510000000	1138
74	A0A087WV57;A0A087WYS3;H7C4X9;Q9ULU4-3;Q9ULU4-6;Q9ULU4-17;Q9ULU4-15;Q9ULU4-23;Q9ULU4-8;Q9ULU4-21;Q9ULU4-18;Q9ULU4-14;Q9ULU4-12;Q9ULU4-22;Q9ULU4-16;Q9ULU4-9;Q9ULU4-5;Q9ULU4-20;Q9ULU4;Q9ULU4-13;Q9ULU4-10;Q9ULU4-11;Q9ULU4-7;Q9ULU4-19	A0A087WV57;A0A087WYS3;H7C4X9;Q9ULU4-3;Q9ULU4-6;Q9ULU4-17;Q9ULU4-15;Q9ULU4-23;Q9ULU4-8;Q9ULU4-21;Q9ULU4-18;Q9ULU4-14;Q9ULU4-12;Q9ULU4-22;Q9ULU4-16;Q9ULU4-9;Q9ULU4-5;Q9ULU4-20;Q9ULU4;Q9ULU4-13;Q9ULU4-10;Q9ULU4-11;Q9ULU4-7;Q9ULU4-19	Protein kinase C-binding protein 1	ZMYND8	13.9766	15.9326	16.27	NaN	16.0422	NaN	NaN	15.6174	15.9364	NaN	NaN	1	1	1	1.3	1.3	1.3	85.629	0.0084855	2.2514	20409000	2
75	A0A087WV73;P46087-3;P46087-2;P46087;P46087-4;F5GYR3;F5H5X6	A0A087WV73;P46087-3;P46087-2;P46087;P46087-4;F5GYR3	Probable 28S rRNA (cytosine(4447)-C(5))-methyltransferase	NOP2	18.554	20.2507	17.9941	19.0927	18.8441	16.9516	19.4037	19.6484	17.3077	19.6093	19.2744	4	4	4	5.6	5.6	5.6	94.095	0	9.7883	286840000	20
76	J3QS48;I3L295;J3KT75;J3QW43;J3QRD5;Q9H3L2;Q1HDL3;A0A087WV81;O75352-2;O75352;J3KTK8;J3QQZ4;J3KSI4;I3L1D2;I3L4E0;I3L405;I3L261	J3QS48;I3L295;J3KT75;J3QW43;J3QRD5;Q9H3L2;Q1HDL3;A0A087WV81;O75352-2;O75352;J3KTK8;J3QQZ4;J3KSI4;I3L1D2;I3L4E0	Mannose-P-dolichol utilization defect 1 protein	MPDU1;HBEBP2BPA	23.7326	22.8668	23.5019	23.7428	23.3898	24.2608	24.8058	24.4202	24.3905	24.6155	24.183	4	4	4	39.6	39.6	39.6	10.978	0	7.5409	1174500000	31
77	A0A087WV97;Q8WU79-2;Q8WU79;X6RCC3;Q8WU79-3	A0A087WV97;Q8WU79-2;Q8WU79;X6RCC3;Q8WU79-3	Stromal membrane-associated protein 2	SMAP2	NaN	18.2925	21.7258	19.6486	21.0439	21.7706	19.6153	NaN	17.6192	19.4272	19.976	6	6	5	15.3	15.3	13.4	46.382	0	11.113	253210000	9
78	A0A087WVC1;A0A087WVB0;Q9BQ39	A0A087WVC1;A0A087WVB0;Q9BQ39	ATP-dependent RNA helicase DDX50	DDX50	20.1052	19.6548	21.2761	18.6368	21.7827	20.2618	15.5749	19.4271	19.192	17.6269	18.118	6	5	5	8.9	7.3	7.3	82.226	0	10.382	545370000	14
79	A0A087WVD4;Q9HBK9-2;Q9HBK9	A0A087WVD4;Q9HBK9-2;Q9HBK9	Arsenite methyltransferase	AS3MT	NaN	NaN	NaN	NaN	NaN	19.9732	NaN	NaN	NaN	NaN	NaN	3	3	3	9.8	9.8	9.8	37.969	0	5.6623	25734000	3
80	A0A087WVI0;E9PBL8;Q8WTW3;J3KSY3;J3QKY9;J3QLT5	A0A087WVI0;E9PBL8;Q8WTW3	Conserved oligomeric Golgi complex subunit 1	COG1	15.977	15.1625	19.9203	18.1029	20.0397	NaN	17.3773	NaN	17.1007	17.8727	16.9157	6	6	6	8.3	8.3	8.3	104.79	0	12.523	181370000	7
81	A0A087WVI1;Q96JY6;Q96JY6-3;F8WFB8;C9J760;C9J0X3;C9K0F0;C9JSR2;C9JS55;Q96JY6-2;Q96JY6-4;Q96JY6-5;A0A087WU48;E5RGS7;H0YBP7;B3KPU0	A0A087WVI1;Q96JY6;Q96JY6-3;F8WFB8;C9J760;C9J0X3;C9K0F0;C9JSR2;C9JS55;Q96JY6-2;Q96JY6-4;Q96JY6-5	PDZ and LIM domain protein 2	PDLIM2	NaN	18.4549	NaN	15.8674	15.1065	19.7224	NaN	NaN	NaN	NaN	NaN	3	3	3	14.2	14.2	14.2	34.767	0	10.632	32147000	5
82	A0A087WVI4;Q7Z404-1;A0A087WT65;Q7Z404;Q7Z404-3;C9JFU4	A0A087WVI4;Q7Z404-1;A0A087WT65;Q7Z404	Transmembrane channel-like protein;Transmembrane channel-like protein 4	TMC4	20.1935	NaN	20.8492	NaN	17.2937	NaN	21.0397	20.2971	20.9673	20.731	20.7271	7	7	7	13.5	13.5	13.5	78.737	0	11.598	366570000	14
83	A0A087WVJ0;A0A087X2A4;A0A087WWM1;P15941-7;P15941-17;P15941-11;P15941-8;P15941-4;P15941-3;P15941;P15941-2;B1AVQ7;A0A087X0L2;P15941-13;P15941-15;P15941-6;A0A087X061;A0A087WZZ6;Q7Z536;A6ZIE4;A6ZIE3;P15941-12;P15941-16;P15941-9;P15941-10	A0A087WVJ0;A0A087X2A4;A0A087WWM1;P15941-7;P15941-17;P15941-11;P15941-8;P15941-4;P15941-3;P15941;P15941-2;B1AVQ7;A0A087X0L2;P15941-13;P15941-15;P15941-6	Mucin-1;Mucin-1 subunit alpha;Mucin-1 subunit beta	MUC1	23.7951	NaN	NaN	NaN	NaN	NaN	23.1327	23.6896	22.5048	22.7175	NaN	5	5	5	29.4	29.4	29.4	25.565	0	14.242	401040000	18
84	A0A087WVM2;Q8N6Q3;Q8N6Q3-2	A0A087WVM2;Q8N6Q3	CD177 antigen	CD177	23.8504	NaN	NaN	NaN	NaN	NaN	23.4896	23.63	23.5873	22.4081	NaN	6	6	6	20.8	20.8	20.8	46.381	0	45.903	816010000	17
85	A0A087WVM3;O00622	A0A087WVM3;O00622	Protein CYR61	CYR61	NaN	NaN	20.1894	NaN	NaN	NaN	NaN	NaN	NaN	NaN	NaN	3	3	3	10.3	10.3	10.3	41.839	0	8.8699	34674000	2
86	A0A087WVQ6;Q00610-2;Q00610;J3KS13;A0A087WX41;P53675-2;P53675;K7EJJ5;J3KSQ2;J3KRF5;J3QL20;F5H5N6	A0A087WVQ6;Q00610-2;Q00610	Clathrin heavy chain;Clathrin heavy chain 1	CLTC	26.7028	25.939	26.5902	25.8546	26.6915	25.5171	26.8023	26.2995	26.314	26.812	26.5256	80	80	80	59.1	59.1	59.1	192.06	0	323.31	104460000000	2109
87	A0A087WVV9;P22694-4;P22694-3;P22694;P22694-5;P22694-7;P22694-6;P22694-9;P22694-2;B1APG2;B1APF8;B1APF9;B1APG3;A0A087WVC4;P22694-8;B1APF6;B1APF7;B1APG1;B1APG0;P22694-10	A0A087WVV9;P22694-4;P22694-3;P22694;P22694-5;P22694-7;P22694-6;P22694-9;P22694-2;B1APG2;B1APF8;B1APF9;B1APG3;A0A087WVC4;P22694-8;B1APF6;B1APF7;B1APG1;B1APG0;P22694-10	cAMP-dependent protein kinase catalytic subunit beta	PRKACB	23.536	23.3835	24.2691	22.8212	24.1699	23.4885	23.1829	21.8135	21.8294	22.6515	22.411	11	11	5	34.2	34.2	12.3	41.296	0	47.489	2165100000	64
88	A0A087WZC4;A0A087WVW4;O43548-2;O43548;A0A087WVS3	A0A087WZC4;A0A087WVW4;O43548-2;O43548;A0A087WVS3	Protein-glutamine gamma-glutamyltransferase 5	TGM5	NaN	NaN	NaN	18.438	NaN	NaN	NaN	NaN	NaN	NaN	NaN	3	2	2	6.3	5.2	5.2	71.787	0.00062396	3.5973	11365000	2
89	A0A087WWX0;A0A087WVZ9;P19388	A0A087WWX0;A0A087WVZ9;P19388	DNA-directed RNA polymerases I, II, and III subunit RPABC1	POLR2E	20.9673	21.9571	20.7911	21.0436	21.7971	22.0687	19.2019	20.7037	19.712	20.0106	NaN	3	3	3	20.9	20.9	20.9	15.421	0.00021515	4.0644	178930000	6
90	A0A087WW23;P20292	A0A087WW23;P20292	Arachidonate 5-lipoxygenase-activating protein	ALOX5AP	24.6656	19.2155	NaN	NaN	NaN	24.744	24.2487	23.7389	24.1638	18.9096	24.2411	3	3	3	14.7	14.7	14.7	24.208	0	14.662	1368900000	8
91	A0A087WW40;Q9Y371;Q9Y371-2;Q9Y371-3	A0A087WW40;Q9Y371;Q9Y371-2;Q9Y371-3	Endophilin-B1	SH3GLB1	22.0005	20.6568	21.4668	21.6047	21.4248	24.6416	22.0841	21.7599	21.8121	21.8919	22.4097	7	7	7	21.3	21.3	21.3	44.26	0	109.47	1513800000	27
92	C9JAG1;A0A087WW58;Q9C0D9	C9JAG1;A0A087WW58;Q9C0D9	Ethanolaminephosphotransferase 1	EPT1	21.7651	21.1755	21.7941	NaN	21.9553	20.5275	21.5602	21.6456	NaN	NaN	NaN	1	1	1	8.9	8.9	8.9	20.557	0.00021455	4.0355	74750000	4
93	B4DGL8;A0A087WW65;O75027-3;O75027;O75027-2	B4DGL8;A0A087WW65;O75027-3;O75027;O75027-2	ATP-binding cassette sub-family B member 7, mitochondrial	ABCB7	22.6836	19.4342	21.6767	21.2365	20.6756	21.0697	22.008	21.4585	21.6929	21.3366	21.6419	7	7	7	14.4	14.4	14.4	77.12	0	30.177	1243900000	37
94	E9PB87;A0A087WW70;O43516-2;O43516;O43516-3	E9PB87;A0A087WW70;O43516-2;O43516;O43516-3	WAS/WASL-interacting protein family member 1	WIPF1	NaN	NaN	NaN	NaN	NaN	NaN	NaN	NaN	NaN	NaN	NaN	1	1	1	4	4	4	40.462	0.0008244	3.4809	0	1
95	A0A087WW77;Q15334	A0A087WW77;Q15334	Lethal(2) giant larvae protein homolog 1	LLGL1	21.4493	19.6542	18.8866	18.656	19.3602	21.872	14.4478	18.8627	17.9374	17.9359	19.0167	12	12	12	15.8	15.8	15.8	114.43	0	31.979	490550000	19
96	A0A087WW82;U3KPV2;E9PKY3;B7ZAQ6-2;B7ZAQ6-3;P0CG08;B7ZAQ6;A0A087WW78;A6NKF9	A0A087WW82;U3KPV2;E9PKY3;B7ZAQ6-2;B7ZAQ6-3;P0CG08;B7ZAQ6;A0A087WW78;A6NKF9	Golgi pH regulator A;Golgi pH regulator B;Putative Golgi pH regulator C	GPR89B;GPR89A;GPR89C	22.961	22.8579	21.6591	21.5244	21.0457	21.0825	22.5208	22.7306	22.2013	21.8936	21.1891	3	3	3	29.7	29.7	29.7	14.195	0	11.206	419980000	21
97	A0A087WW88;C9J0A7;Q9UQN3-2;Q9UQN3	A0A087WW88;C9J0A7;Q9UQN3-2;Q9UQN3	Charged multivesicular body protein 2b	CHMP2B	19.1633	NaN	21.196	NaN	20.4833	21.7561	NaN	NaN	NaN	NaN	NaN	1	1	1	5.6	5.6	5.6	20.431	0.00042017	3.7418	103090000	3
98	A0A087WW89;P01771	A0A087WW89		IGHV3-72	23.3033	24.6494	22.5081	23.1549	23.968	22.4741	25.5849	19.6945	22.4216	25.1551	23.1373	3	3	2	36.6	36.6	17.8	11.167	0	101.6	1154900000	57
99	A0A087X2E3;A0A087WW96;Q92777-2;Q92777	A0A087X2E3;A0A087WW96;Q92777-2;Q92777	Synapsin-2	SYN2	20.6385	NaN	NaN	NaN	NaN	17.8747	NaN	NaN	NaN	NaN	NaN	4	3	3	11.1	7.7	7.7	52.31	0	8.3022	89999000	5
100	A0A087WWF1;Q8WWX9	A0A087WWF1;Q8WWX9	Selenoprotein M	SELM	19.955	NaN	19.8622	NaN	20.1982	20.3152	18.4654	NaN	NaN	NaN	NaN	2	2	2	19.4	19.4	19.4	16.081	0.00021678	4.1643	56318000	2
101	A0A087WWF6;P49005;C9JHC7;F8W8R3;C9JLE1	A0A087WWF6;P49005;C9JHC7;F8W8R3	DNA polymerase delta subunit 2	POLD2	NaN	NaN	17.6811	NaN	NaN	20.3667	NaN	NaN	NaN	NaN	NaN	3	3	3	11.1	11.1	11.1	54.695	0	23.82	40615000	3
102	A0A087WWJ1;P52701-4;P52701-2;P52701-3;P52701	A0A087WWJ1;P52701-4;P52701-2;P52701-3;P52701	DNA mismatch repair protein Msh6	MSH6	NaN	17.1929	14.7642	16.4494	17.0012	13.0692	NaN	15.3714	NaN	NaN	NaN	2	2	2	2	2	2	121.12	0.0042397	2.6997	29204000	2
103	A0A087WWK8;Q6DN90;Q6DN90-2	A0A087WWK8;Q6DN90;Q6DN90-2	IQ motif and SEC7 domain-containing protein 1	IQSEC1	18.8555	NaN	17.8148	14.8983	18.12	21.8175	NaN	16.2527	NaN	NaN	16.8548	11	11	10	11.7	11.7	11	124.48	0	35.384	321470000	19
104	A0A087WWL9	A0A087WWL9		HLA-C	21.1938	23.222	23.9841	20.2044	23.0552	23.1298	24.0469	23.1547	24.0885	24.0398	24.0543	10	1	0	39.1	4.9	0	36.534	0	85.46	4337200000	50
105	H0YMB3;H0YLV5;A0A087WWM4;F8WAN9;H0YNJ6;Q9P2T1;Q9P2T1-2;Q9P2T1-3;H0YK13;H0YK71;H0YLB8;H0YL68;H0YN22;H0YMW6;H0YNS9;H0YMR9;H0YMV5;H0YNH0	H0YMB3;H0YLV5;A0A087WWM4;F8WAN9;H0YNJ6;Q9P2T1;Q9P2T1-2;Q9P2T1-3;H0YK13;H0YK71;H0YLB8	GMP reductase;GMP reductase 2	GMPR2	21.292	19.9656	19.9722	21.0273	21.3689	22.0835	20.2625	16.7412	19.9981	18.4119	NaN	4	4	4	14.9	14.9	14.9	33.921	0.00022589	4.7679	254460000	8
106	A0A087WWM6;O43272;E7EQL6;O43272-2;O43272-1;Q3KRA9;Q3KRA9-2	A0A087WWM6;O43272	Proline dehydrogenase 1, mitochondrial	PRODH	18.7088	NaN	16.7757	NaN	NaN	19.461	17.1009	NaN	18.3767	NaN	NaN	5	5	5	13.8	13.8	13.8	68.028	0	16.509	74961000	9
107	A0A087WWP7;A0A087X1P0;P23470-2;P23470	A0A087WWP7;A0A087X1P0;P23470-2;P23470	Protein-tyrosine-phosphatase;Receptor-type tyrosine-protein phosphatase gamma	PTPRG	18.5624	16.7828	16.8542	NaN	18.0597	17.5713	16.6297	19.3958	18.2998	17.9513	17.7424	9	9	9	8.8	8.8	8.8	151.54	0	11.813	194100000	14
108	V9GYP5;A0A087WWQ2;Q92979;A0A087WVM7	V9GYP5;A0A087WWQ2;Q92979	Ribosomal RNA small subunit methyltransferase NEP1	EMG1	NaN	19.5039	19.3925	NaN	19.261	NaN	NaN	16.6555	NaN	NaN	NaN	3	3	3	20.3	20.3	20.3	23.79	0.0010277	3.4545	37805000	5
109	A0A087WWR8;Q8IWU6;H0YDR1	A0A087WWR8;Q8IWU6	Extracellular sulfatase Sulf-1	SULF1	NaN	20.4797	20.9968	19.16	NaN	NaN	NaN	NaN	NaN	NaN	NaN	7	7	7	10.8	10.8	10.8	77.432	0	22.595	128360000	10
110	A0A087WWS1;Q96FV9;R4GMN4	A0A087WWS1;Q96FV9;R4GMN4	THO complex subunit 1	THOC1	NaN	17.5192	NaN	NaN	17.4775	NaN	NaN	NaN	NaN	16.3994	16.6774	2	2	2	3.7	3.7	3.7	75.651	0.0063611	2.4034	22464000	3
111	A0A087WWS8;Q9NY61	A0A087WWS8;Q9NY61	Protein AATF	AATF	NaN	20.8444	NaN	NaN	NaN	NaN	NaN	NaN	NaN	NaN	NaN	1	1	1	21.4	21.4	21.4	17.838	0.0063587	2.4025	11297000	1
112	H0Y6A7;H0UIB3;Q5TE61;A0A087WWT8;A0A087X057;Q96MZ0-2;Q96MZ0;Q96MZ0-4	H0Y6A7;H0UIB3;Q5TE61;A0A087WWT8;A0A087X057;Q96MZ0-2;Q96MZ0;Q96MZ0-4	Ganglioside-induced differentiation-associated protein 1-like 1	GDAP1L1	18.5281	NaN	19.3022	NaN	18.863	NaN	NaN	NaN	NaN	NaN	NaN	1	1	1	5.2	5.2	5.2	28.775	0.0079896	2.325	28437000	2
113	A0A087WWU9;A0A087WYR0;P09132;D6RBG4;P09132-2	A0A087WWU9;A0A087WYR0;P09132;D6RBG4;P09132-2	Signal recognition particle 19 kDa protein	SRP19	19.451	NaN	20.954	NaN	22.3986	18.4379	19.6347	NaN	NaN	18.7395	19.9167	2	2	2	25	25	25	11.85	0	7.8068	71033000	4
114	A0A087WWY8;D6REC4	A0A087WWY8;D6REC4	Cilia- and flagella-associated protein 99	CFAP99	NaN	NaN	NaN	NaN	NaN	16.8738	NaN	NaN	NaN	15.4646	NaN	3	3	3	5.9	5.9	5.9	74.944	0.0021709	2.9825	18223000	5
115	A0A087WX18	A0A087WX18		HLA-DRB1	NaN	NaN	NaN	NaN	NaN	20.0863	NaN	NaN	NaN	NaN	NaN	9	1	0	46.6	4.5	0	29.891	0.0095395	2.1791	40182000	2
116	A0A087WX37;P13612;E7EP60	A0A087WX37;P13612;E7EP60	Integrin alpha-4	ITGA4	17.2395	NaN	NaN	NaN	17.9575	14.6466	18.5931	17.0543	17.1407	13.8938	18.2873	5	5	5	6.1	6.1	6.1	115.35	0	15.175	140370000	6
117	C9JWJ3;C9J480;A0A087WXB8;Q9Y274;C9JXM2;C9IZL6;C9J0E2;Q9Y274-2	C9JWJ3;C9J480;A0A087WXB8;Q9Y274;C9JXM2;C9IZL6;C9J0E2;Q9Y274-2	Type 2 lactosamine alpha-2,3-sialyltransferase	ST3GAL6	NaN	NaN	NaN	NaN	18.3684	21.7965	NaN	NaN	NaN	NaN	NaN	2	2	2	10.8	10.8	10.8	18.118	0.0083118	2.265	43789000	2
118	A0A087WXT0;A0A087WXC4;Q9UQP3	A0A087WXT0;A0A087WXC4;Q9UQP3	Tenascin-N	TNN	18.7739	NaN	NaN	19.3645	17.7436	NaN	NaN	NaN	14.6319	NaN	14.9295	7	7	7	7.5	7.5	7.5	124.43	0	18.813	95152000	11
119	A0A087WXC5;E7ESZ7;O95299;O95299-2;H7C2W5;H7C1Y7;H7C2X4;C9J6X0;Q8N1B9	A0A087WXC5;E7ESZ7;O95299;O95299-2;H7C2W5;H7C1Y7;H7C2X4	NADH dehydrogenase [ubiquinone] 1 alpha subcomplex subunit 10, mitochondrial	NDUFA10	24.5565	23.6109	24.6943	23.7849	24.6454	23.3217	24.5061	24.3987	24.3501	24.3208	23.5607	14	14	14	43.7	43.7	43.7	40.836	0	129.06	5820000000	227
120	A0A087WXI2;Q9Y6R7;A0A087WUZ2	A0A087WXI2;Q9Y6R7;A0A087WUZ2	IgGFc-binding protein	FCGBP	NaN	16.9304	NaN	14.987	NaN	16.4319	18.5656	NaN	16.3934	15.8915	14.0663	7	7	7	4.6	4.6	4.6	445.21	0	18.5	126050000	7
121	A0A087WXI3;G8JLE9;R9WNI0;A8MQB8;G3V0J0;Q06787-8;Q06787-6;Q06787-2;Q06787-4;Q06787-5;Q06787-9;Q06787-7;Q06787-3;Q06787;Q8IXW7;A0A087WY29;A0A087WWR6;A0A087X1M7;A0A087WWU4	A0A087WXI3;G8JLE9;R9WNI0;A8MQB8;G3V0J0;Q06787-8;Q06787-6;Q06787-2;Q06787-4;Q06787-5;Q06787-9;Q06787-7;Q06787-3;Q06787;Q8IXW7;A0A087WY29	Fragile X mental retardation protein 1	FMR1	18.9193	21.0638	20.9574	20.8275	21.6597	18.1821	18.4176	20.0037	18.0026	18.35	17.5832	7	6	6	17.7	13.1	13.1	47.897	0	9.0168	334520000	12
122	J3QSS3;A0A087WXK5;Q9BZC7-2;Q9BZC7;Q9BZC7-3;E9PGB2;H0Y8C9;H0Y8D6	J3QSS3;A0A087WXK5;Q9BZC7-2;Q9BZC7;Q9BZC7-3;E9PGB2;H0Y8C9;H0Y8D6	ATP-binding cassette sub-family A member 2	ABCA2	NaN	NaN	NaN	NaN	18.0087	17.4827	15.6064	17.1918	17.0766	16.7063	16.7636	2	2	2	0.8	0.8	0.8	269.93	0.002729	2.8434	118340000	2
123	A0A087WXL6;Q9H270;B7Z879;A0A087X2J4	A0A087WXL6;Q9H270;B7Z879	Vacuolar protein sorting-associated protein 11 homolog	VPS11	19.0479	18.5515	21.187	20.7599	19.0183	21.1368	18.183	17.8908	19.6845	22.1615	21.2135	11	11	11	12.6	12.6	12.6	107.81	0	26.42	1034400000	22
124	A0A087WXL8;A0A075B6N8;A0A087WVW2;P01860;P01743	A0A087WXL8;A0A075B6N8;A0A087WVW2;P01860	Ig gamma-3 chain C region	IGHG3	24.2048	25.7418	24.8516	24.0357	23.6549	23.9646	25.8584	19.7904	22.823	26.2713	25.4923	18	8	6	43.3	27.5	22.1	56.889	0	318.28	9810100000	181
125	A0A087WXM6;J3QQT2;J3KRX5;P18621;P18621-3;J3QLC8;P18621-2;J3KRB3;A0A087WWH0;J3QS96;A0A087WY81;J3KSJ0	A0A087WXM6;J3QQT2;J3KRX5;P18621;P18621-3;J3QLC8;P18621-2;J3KRB3;A0A087WWH0;J3QS96;A0A087WY81	60S ribosomal protein L17	RPL17	25.9096	26.3967	26.297	26.0301	26.3529	23.9761	23.5523	25.2134	23.3952	25.9127	25.1789	8	8	8	49.1	49.1	49.1	19.586	0	69.747	7147900000	115
126	A0A087WXS7;O43681;K7ERW9	A0A087WXS7;O43681	ATPase ASNA1	ASNA1	23.4273	23.532	23.3351	23.0595	24.0385	22.7721	23.0365	20.3289	22.6905	23.3477	20.9678	8	8	8	30.8	30.8	30.8	37.119	0	14.057	1666700000	35
127	Q5SZ82;A0A087WXU0;Q9NWS8-2;Q9NWS8	Q5SZ82;A0A087WXU0;Q9NWS8-2;Q9NWS8	Required for meiotic nuclear division protein 1 homolog	RMND1	20.2697	17.9967	21.5282	18.4539	18.3543	18.1762	19.903	17.7323	18.8671	18.974	19.05	3	3	3	15.6	15.6	15.6	24.064	0.002545	2.9021	107070000	4
128	A0A087WY55;Q9NP79;Q5TGM0;Q9NP79-2	A0A087WY55;Q9NP79	Vacuolar protein sorting-associated protein VTA1 homolog	VTA1	20.325	22.24	21.6611	21.6899	22.4744	22.2685	20.6227	20.6248	19.603	20.8458	20.6999	5	5	5	18.6	18.6	18.6	31.102	0	10.534	420890000	19
129	Q6ICJ4;A0A087WY67;P0CG30;P0CG29	Q6ICJ4;A0A087WY67;P0CG30;P0CG29	Glutathione S-transferase theta-2B;Glutathione S-transferase theta-2	Em:AP000351.3;GSTT2;GSTT2B	19.5831	20.7058	17.9103	NaN	20.2456	23.3351	NaN	NaN	17.7134	NaN	NaN	6	6	5	32.2	32.2	29.1	25.948	0	12.059	192160000	7
130	A0A087WY71;E9PFW3;Q96CW1-2;Q96CW1;C9JJ47;C9JTK4;C9JGT8;C9JJD3;C9JPV8;H7C4C3	A0A087WY71;E9PFW3;Q96CW1-2;Q96CW1;C9JJ47;C9JTK4;C9JGT8	AP-2 complex subunit mu	AP2M1	25.5837	24.7328	25.1519	24.4922	24.9418	24.5766	24.98	24.8866	24.1321	24.6676	24.8052	16	16	16	40.6	40.6	40.6	49.526	0	187.06	10298000000	193
131	A0A087WY82;Q9Y624;Q9Y624-2	A0A087WY82;Q9Y624;Q9Y624-2	Junctional adhesion molecule A	F11R	23.7978	24.1541	21.6301	23.4892	22.7214	21.3253	24.1666	23.8481	23.9026	24.5131	23.7088	6	6	6	29.7	29.7	29.7	30.197	0	44.229	2401900000	51
132	D6RFM0;D6RAH7;H9KV45;A0A087WY85;P62837-2;P62837;P61077;P61077-2;P61077-3;D6RAW0	D6RFM0;D6RAH7;H9KV45;A0A087WY85;P62837-2;P62837;P61077;P61077-2;P61077-3;D6RAW0	Ubiquitin-conjugating enzyme E2 D2;Ubiquitin-conjugating enzyme E2 D3	UBE2D2;UBE2D3	22.1504	23.1729	23.417	23.1324	23.428	23.846	22.7123	21.588	21.8561	22.6893	19.7769	2	2	2	35.7	35.7	35.7	11.065	0.0042291	2.6754	338260000	5
133	A0A087WY88;Q8N5M9	A0A087WY88;Q8N5M9	Protein jagunal homolog 1	JAGN1	22.178	21.318	22.0029	21.7083	21.9614	21.7316	21.7903	21.5357	21.2826	21.473	20.9963	1	1	1	6.6	6.6	6.6	20.791	0.00022124	4.438	295550000	24
134	A0A087WY89;CON__Q9BYQ7;Q9BYQ7	A0A087WY89;CON__Q9BYQ7;Q9BYQ7	Keratin-associated protein 4-1	KRTAP4-1	NaN	19.2014	NaN	22.8737	17.8231	NaN	NaN	NaN	NaN	NaN	NaN	2	2	2	15	15	15	13.242	0	18.392	76680000	2
135	A0A087WYC5;A0A087WSX2	A0A087WYC5		IGHG1	NaN	NaN	18.7329	NaN	18.9419	18.494	20.3037	NaN	NaN	19.3675	NaN	20	1	1	51.2	2.3	2.3	52.426	0.006367	2.4113	81979000	1
136	A0A087WYD6;Q03519;Q03519-2	A0A087WYD6;Q03519;Q03519-2	Antigen peptide transporter 2	TAP2	23.0613	22.4978	22.7181	21.9815	23.4423	21.8184	23.8298	22.7159	23.3948	22.7033	22.8707	11	11	2	19.5	19.5	5.1	77.596	0	53.297	3427100000	72
137	A0A087WYE1	A0A087WYE1		IGHG1	18.7339	20.1006	20.681	NaN	19.0005	NaN	21.525	NaN	NaN	20.0858	NaN	20	1	0	50.9	2.3	0	52.109	0	18.316	181830000	7
138	A0A087WYF6;J3KP36;F8W7U3;E7ESD2;A0A096LPC5;Q9Y4E1-5;Q5SNT6;Q9Y4E1-3;Q9Y4E1-6;Q9Y4E1-2;Q9Y4E1;Q9Y4E1-4;Q641Q2-2;Q641Q2	A0A087WYF6;J3KP36;F8W7U3;E7ESD2;A0A096LPC5;Q9Y4E1-5;Q5SNT6;Q9Y4E1-3;Q9Y4E1-6;Q9Y4E1-2;Q9Y4E1;Q9Y4E1-4;Q641Q2-2;Q641Q2	WASH complex subunit FAM21C;WASH complex subunit FAM21B;WASH complex subunit FAM21A	FAM21A;FAM21C;FAM21B	16.5111	16.6722	18.5537	NaN	17.9652	NaN	NaN	15.497	NaN	NaN	NaN	3	3	3	3.6	3.6	3.6	136.57	0.00082423	3.4799	59278000	3
139	A0A087WYF7;Q6UXV4;A0A087WUX8	A0A087WYF7;Q6UXV4;A0A087WUX8	MICOS complex subunit MIC27	APOOL	24.7783	22.9214	23.8771	23.1421	23.6759	22.9092	24.147	23.7527	23.5986	22.7313	23.8124	10	10	10	57.8	57.8	57.8	29.205	0	85.212	2563900000	70
140	D6RAF1;A0A087WYF8;Q53GG5-3;Q53GG5-2;Q53GG5	D6RAF1;A0A087WYF8;Q53GG5-3;Q53GG5-2;Q53GG5	PDZ and LIM domain protein 3	PDLIM3	NaN	NaN	20.1777	NaN	NaN	NaN	NaN	20.0973	19.7081	NaN	20.4134	1	1	1	35.7	35.7	35.7	4.5253	0	7.0564	13682000	1
141	E9PFH7;A0A087WYG2;Q9UPT6;Q9UPT6-2	E9PFH7;A0A087WYG2;Q9UPT6	C-Jun-amino-terminal kinase-interacting protein 3	MAPK8IP3	17.0049	17.3666	19.474	NaN	19.6592	NaN	15.1193	NaN	NaN	18.3483	16.4619	5	5	3	4.7	4.7	3.2	146.68	0	14.523	172500000	7
142	G3V2K5;G3V3G2;G3V535;G3V5F7;A0A087WYI2;B7Z3I5;Q9UI08;Q9UI08-2	G3V2K5;G3V3G2;G3V535;G3V5F7;A0A087WYI2;B7Z3I5;Q9UI08;Q9UI08-2	Ena/VASP-like protein	EVL	NaN	NaN	20.9696	NaN	NaN	19.9546	18.4897	20.1322	21.1628	NaN	20.6148	3	3	3	32.2	32.2	32.2	13.031	0	8.0614	111830000	7
143	A0A087WYJ9;A0A075B6N9;P01871;P01871-2;P04220	A0A087WYJ9;A0A075B6N9;P01871;P01871-2;P04220	Ig mu chain C region;Ig mu heavy chain disease protein	IGHM	19.4468	19.2822	NaN	16.8833	NaN	NaN	19.54	NaN	NaN	20.5049	NaN	22	2	2	43.4	2.7	2.7	65.7	0.0058304	2.4532	115420000	13
144	A0A087WYM3;F8WCF4;C9JZQ0;B5MCS1;E7EWX6;Q8IXJ6-4;Q8IXJ6-5;Q8IXJ6-2;Q8IXJ6-3;Q8IXJ6	A0A087WYM3;F8WCF4;C9JZQ0;B5MCS1;E7EWX6;Q8IXJ6-4;Q8IXJ6-5;Q8IXJ6-2;Q8IXJ6-3;Q8IXJ6	NAD-dependent protein deacetylase sirtuin-2	SIRT2	23.2135	NaN	NaN	16.8194	NaN	24.9219	17.9301	17.6436	NaN	NaN	NaN	2	2	2	4.4	4.4	4.4	43.301	0.0053131	2.5566	1100500000	14
145	A0A087WYN9;Q7Z478;Q6P158	A0A087WYN9;Q7Z478	ATP-dependent RNA helicase DHX29	DHX29	13.3319	18.1733	17.6337	17.2281	18.1461	15.1886	18.2527	16.6344	14.5908	17.864	16.9662	7	7	7	5.7	5.7	5.7	155.29	0	8.0514	160950000	7
146	A0A087WYP2;Q8IZQ5;H0YE28;H3BV83	A0A087WYP2;Q8IZQ5;H0YE28	Selenoprotein H	C11orf31;SELH	20.4973	23.1338	23.5198	21.6432	23.7648	20.6263	21.1607	20.7024	20.5526	20.5069	20.4838	4	4	4	35.5	35.5	35.5	13.303	0	6.4154	383460000	6
147	A0A087WYR3;O43399;O43399-5;O43399-7;A0A087WZ51;O43399-2;O43399-4;O43399-3;O43399-6	A0A087WYR3;O43399;O43399-5;O43399-7;A0A087WZ51;O43399-2;O43399-4;O43399-3;O43399-6	Tumor protein D54	TPD52L2	21.7479	21.7404	22.4751	21.27	22.1711	18.6238	21.5664	21.6777	21.0026	22.2048	21.7246	5	5	5	32.4	32.4	32.4	23.764	0	15.23	728880000	22
148	A0A087WYR4;A0A087WWC9;A0A087WXC3;A0A087WWU7;A0A087WYN7;A0A087WWT5;A0A087WU42;A0A087X2A1;A0A087WX49;B9A064;A0A075B6K8;P0CG04;A0A087WZW9	A0A087WYR4;A0A087WWC9;A0A087WXC3;A0A087WWU7;A0A087WYN7;A0A087WWT5;A0A087WU42;A0A087X2A1;A0A087WX49;B9A064;A0A075B6K8;P0CG04	Immunoglobulin lambda-like polypeptide 5;Ig lambda-1 chain C regions	IGLL5;IGLC1	27.3272	28.4104	26.9152	26.7981	26.8691	26.7148	28.1041	24.7703	25.895	28.1228	27.0857	7	7	3	39.6	39.6	14.9	24.83	0	323.31	21221000000	151
149	A0A087WYS1;E7EUC7;Q16851-2;Q16851;C9JNZ1;C9JWG0;C9JVG3;C9JQU9;C9JTZ5;C9JUW1;F2Z3H1	A0A087WYS1;E7EUC7;Q16851-2;Q16851;C9JNZ1	UTP--glucose-1-phosphate uridylyltransferase	UGP2	23.3717	23.2288	22.2786	23.0103	23.0855	23.5486	23.5881	21.3957	22.913	23.1179	22.2115	12	12	12	27.2	27.2	27.2	56.967	0	110.44	3084600000	84
150	A0A087WYT3;Q15185-4;Q15185;Q15185-3;B4DDC6;Q15185-2	A0A087WYT3;Q15185-4;Q15185;Q15185-3;B4DDC6	Prostaglandin E synthase 3	PTGES3	22.9556	23.0739	23.3047	22.1672	23.8656	22.7804	22.4637	21.7583	20.2992	22.3764	20.7413	4	4	4	25	25	25	19.155	0	18.204	664650000	9
151	A0A087WYU1;Q9Y5X1	A0A087WYU1;Q9Y5X1	Sorting nexin;Sorting nexin-9	SNX9	21.4781	19.9873	21.5725	19.9501	21.0247	22.0771	19.6725	21.3782	20.0372	18.6221	20.6304	7	7	7	16.7	16.7	16.7	66.476	0	21.497	690290000	23
152	A0A087WYV5;X6R3P0;O94813-3;O94813-2;O94813;E9PCX4	A0A087WYV5;X6R3P0;O94813-3;O94813-2;O94813	Slit homolog 2 protein;Slit homolog 2 protein N-product;Slit homolog 2 protein C-product	SLIT2	NaN	15.8774	19.1047	NaN	NaN	NaN	NaN	NaN	NaN	NaN	NaN	3	3	3	3.3	3.3	3.3	159.98	0	9.3232	45550000	2
153	A0A087WYV8;P35556;D6RJI3;P35556-2;E9PHW4;A0A087WV40;D6REJ2	A0A087WYV8;P35556;D6RJI3;P35556-2	Fibrillin-2	FBN2	NaN	21.2757	17.4066	20.6144	19.5158	16.9302	15.8973	18.318	18.7283	NaN	18.7423	17	14	14	7.4	6.4	6.4	314.67	0	50.815	1044000000	37
154	A0A087WYY1;Q9Y646;E5RH35;E5RJZ7;E5RJP8;E5RJA8	A0A087WYY1;Q9Y646;E5RH35;E5RJZ7;E5RJP8;E5RJA8	Carboxypeptidase Q	CPQ	17.9241	19.0695	21.2966	NaN	21.7471	18.4361	NaN	16.798	20.0632	NaN	NaN	5	5	5	12.2	12.2	12.2	59.744	0	11.43	227080000	9
155	A0A087WYZ4;P01215	A0A087WYZ4;P01215	Glycoprotein hormones alpha chain	CGA	NaN	NaN	23.0647	NaN	27.3506	NaN	NaN	NaN	20.316	NaN	NaN	3	3	3	18.4	18.4	18.4	16.306	0	7.2078	1268500000	7
156	A0A087WZ32;A8K727;Q9HB19;A0A087X038;E5RHB5;E5RGP3	A0A087WZ32;A8K727;Q9HB19;A0A087X038;E5RHB5	Pleckstrin homology domain-containing family A member 2	PLEKHA2	NaN	17.1087	19.2302	18.874	17.8018	21.7125	16.3917	17.7895	18.5526	18.6466	17.0578	5	5	5	16.5	16.5	16.5	41.21	0	6.4248	166670000	9
157	A0A087WZ62;Q9H6U8;Q9H6U8-3;Q9H6U8-2;Q9H6U8-4;H0YCW6;A0A087WTZ3;A0A087WV58;A0A087WVC0;A0A087WZY8	A0A087WZ62;Q9H6U8;Q9H6U8-3;Q9H6U8-2;Q9H6U8-4;H0YCW6	Alpha-1,2-mannosyltransferase ALG9	ALG9	20.4071	20.297	18.6985	20.7573	19.9936	17.6623	20.6265	19.796	20.3369	19.1474	20.0754	6	6	6	9.6	9.6	9.6	95.921	0	23.934	499030000	26
158	A0A087WZ79;O60296	A0A087WZ79;O60296	Trafficking kinesin-binding protein 2	TRAK2	NaN	NaN	NaN	NaN	NaN	18.1857	NaN	NaN	NaN	NaN	NaN	1	1	1	2.3	2.3	2.3	86.753	0	7.194	13119000	1
159	A0A087X0S9;A0A087WZ83;CON__Q9BYQ8;Q9BYQ6;Q9BYQ8	A0A087X0S9;A0A087WZ83;CON__Q9BYQ8;Q9BYQ6;Q9BYQ8	Keratin-associated protein 4-11;Keratin-associated protein 4-9	KRTAP4-9;KRTAP4-7;KRTAP4-11	NaN	NaN	NaN	21.9598	NaN	NaN	NaN	NaN	NaN	NaN	NaN	3	2	2	15.1	10.3	10.3	19.708	0.00021887	4.2868	61185000	2
160	A0A087WZC7;Q13601;Q13601-2	A0A087WZC7;Q13601;Q13601-2	KRR1 small subunit processome component homolog	KRR1	19.9862	21.2315	20.6813	20.7731	20.0577	NaN	17.3456	21.3386	18.2727	20.3707	18.1347	3	3	3	8.3	8.3	8.3	33.282	0.00021863	4.2743	227720000	15
161	A0A087WZE4;P02549-2;P02549;V9GY79	A0A087WZE4;P02549-2;P02549	Spectrin alpha chain, erythrocytic 1	SPTA1	24.6813	20.436	21.0393	18.809	22.0488	21.743	19.8814	21.2431	21.6136	14.5623	22.081	74	74	74	38.4	38.4	38.4	281.11	0	323.31	10528000000	256
162	A0A087WZE9;Q15651-2;P05204;Q15651	A0A087WZE9;Q15651-2;P05204;Q15651	High mobility group nucleosome-binding domain-containing protein 3;Non-histone chromosomal protein HMG-17	HMGN3;HMGN2	20.0435	25.5417	22.8061	25.0984	25.8914	NaN	18.852	22.7102	19.0425	23.7296	21.2797	2	2	2	10	10	10	13.956	0	4.853	1258300000	7
163	A0A087WZH7;P29966	A0A087WZH7;P29966	Myristoylated alanine-rich C-kinase substrate	MARCKS	27.47	24.0296	23.692	24.0777	24.4241	25.6791	24.1098	23.4887	23.4549	23.7548	23.766	8	8	8	42.4	42.4	42.4	31.595	0	233.13	6671400000	58
164	A0A087WZK9;B3KS98;O15372;E5RJT0;E5RGU4	A0A087WZK9;B3KS98;O15372;E5RJT0	Eukaryotic translation initiation factor 3 subunit H	EIF3H	22.1099	22.5524	23.3913	22.6274	23.4613	23.5664	21.6912	22.1321	21.9788	22.6876	22.1957	11	11	11	35.2	35.2	35.2	39.589	0	72.534	2127000000	43
165	D6REQ6;D6RHI9;A0A087WZM2;O00584;H0YAE9	D6REQ6;D6RHI9;A0A087WZM2;O00584;H0YAE9	Ribonuclease T2	RNASET2	18.8581	21.0752	20.6227	19.4817	21.1351	21.1347	21.7038	20.2508	21.733	19.8781	19.7527	4	4	4	22	22	22	25.308	0	45.806	392030000	12
166	A0A087WZN1;O43837;A0A087X2E5;O43837-2;O43837-3	A0A087WZN1;O43837;A0A087X2E5;O43837-2	Isocitrate dehydrogenase [NAD] subunit, mitochondrial;Isocitrate dehydrogenase [NAD] subunit beta, mitochondrial	IDH3B	24.9975	23.9442	24.7022	24.2215	24.5986	22.9938	24.6085	24.4906	25.0943	24.0994	24.5321	15	15	15	52.2	52.2	52.2	42.41	0	152.72	6118300000	158
167	A0A087WZP7;Q86WG5;H0Y767;Q86WG5-3;H0YD05	A0A087WZP7;Q86WG5;H0Y767;Q86WG5-3	Myotubularin-related protein 13	SBF2	NaN	15.9135	NaN	16.3176	NaN	18.0859	15.3131	NaN	NaN	NaN	13.9291	3	3	3	2.3	2.3	2.3	203.14	0	4.9433	56708000	5
168	A0A087WZQ7;Q9H115;Q9H115-2;Q9H115-3	A0A087WZQ7;Q9H115;Q9H115-2;Q9H115-3	Beta-soluble NSF attachment protein	NAPB	20.5684	NaN	21.9742	NaN	21.7902	19.8717	NaN	NaN	NaN	NaN	NaN	8	5	5	32.5	21.2	21.2	33.917	0	82.47	247000000	14
169	A0A087X105;A0A087WZW4;A0A087X1W8;A0A087WZR6;X5DQS5;Q9BY67-5;Q9BY67;Q9BY67-4;Q9BY67-3;A0A087X0T8;Q9BY67-2;F5H125;H0YG94;F5H8J9	A0A087X105;A0A087WZW4;A0A087X1W8;A0A087WZR6;X5DQS5;Q9BY67-5;Q9BY67;Q9BY67-4;Q9BY67-3;A0A087X0T8;Q9BY67-2	Cell adhesion molecule 1	CADM1	23.2398	23.0047	22.0126	22.2103	22.12	21.8126	19.4096	NaN	NaN	NaN	NaN	8	8	8	30	30	30	41.667	0	51.126	958210000	31
170	A0A087WZT2;Q6UX53	A0A087WZT2;Q6UX53	Methyltransferase-like protein 7B	METTL7B	19.9518	19.7763	19.4395	17.8258	19.4361	20.075	22.5295	NaN	18.878	18.6642	18.3353	6	6	6	24.6	24.6	24.6	31.288	0	11.993	304500000	11
171	A0A087WZU5;O43657;A0A087WYV6	A0A087WZU5;O43657;A0A087WYV6	Tetraspanin-6	TSPAN6	22.111	NaN	20.1037	20.9978	21.416	22.3848	NaN	NaN	21.0766	NaN	21.1095	2	2	2	16.8	16.8	16.8	15.609	0	9.6745	163990000	3
172	D6R9P3;D6RD18;D6RBZ0;A0A087WZV1;Q99729-3;Q99729-2;Q99729-4;Q99729	D6R9P3;D6RD18;D6RBZ0;A0A087WZV1;Q99729-3;Q99729-2;Q99729-4;Q99729	Heterogeneous nuclear ribonucleoprotein A/B	HNRNPAB	23.2392	23.8369	23.51	23.8034	23.5963	NaN	22.8942	23.7937	22.3338	23.9908	23.0107	6	6	6	22.1	22.1	22.1	30.302	0	48.204	1657400000	47
173	A0A087WZW8;A0A087WYL9;A0A087WWV8;A0A087WTX5;A0A087X130;P01834;A0A075B6H6;A0A087WUS2;P04433	A0A087WZW8;A0A087WYL9;A0A087WWV8;A0A087WTX5;A0A087X130;P01834;A0A075B6H6	Ig kappa chain C region	IGKV3-11;IGKC;IGKV1-8	28.6258	27.7862	27.8238	28.063	28.4026	27.4477	29.2431	23.8804	25.361	28.7877	27.6198	7	7	7	40.8	40.8	40.8	25.6	0	323.31	41261000000	493
174	F5H3Q5;A0A087WZY5;F5H851;A8MXH5;Q14031-2;Q14031	F5H3Q5;A0A087WZY5;F5H851;A8MXH5;Q14031-2;Q14031	Collagen alpha-6(IV) chain	COL4A6	19.1535	20.2566	23.217	17.4577	24.0732	17.6992	18.2634	18.1038	18.8036	17.5773	17.815	11	10	10	9.9	9.6	9.6	158.12	0	112.97	2436900000	37
175	A0A087WZZ4;Q02094	A0A087WZZ4;Q02094	Ammonium transporter Rh type A	RHAG	23.502	20.5441	19.5093	20.2137	21.2382	22.244	19.3869	20.5744	20.9039	18.3788	21.3895	1	1	1	2.4	2.4	2.4	40.853	0.0042081	2.6392	217630000	12
176	J3KPF9;A0A087X011;E9PES4;Q9Y496;Q5JRK0;C9J9X2;H7C2F6;H0Y718;Q6ZMV9-3;Q6ZMV9;O95239-2;O95239;Q2VIQ3	J3KPF9;A0A087X011;E9PES4;Q9Y496	Kinesin-like protein;Kinesin-like protein KIF3A	KIF3A	26.4386	24.9431	22.8604	22.6325	23.5572	25.4992	27.0277	27.3784	26.3721	NaN	27.3947	3	3	3	4.6	4.6	4.6	80.354	0.00021891	4.2899	44501000000	2
177	A0A087X020;Q9Y3A5;F8WE72	A0A087X020;Q9Y3A5	Ribosome maturation protein SBDS	SBDS	21.5088	18.1605	22.3669	21.3287	22.9156	24.5781	21.8034	21.1921	20.1024	22.3391	21.2908	7	7	7	28.4	28.4	28.4	28.864	0	58.194	1050300000	31
178	A0A087X043;O43424-2;O43424	A0A087X043;O43424-2;O43424	Glutamate receptor ionotropic, delta-2	GRID2	19.6507	NaN	16.1511	NaN	16.1322	17.6736	NaN	16.5288	NaN	16.0731	NaN	2	1	1	2.6	1.2	1.2	104.15	0.0016006	3.1459	75953000	1
179	A0A087X054;Q9Y4L1;E9PJ21;A0A087WWI4;K7EQK2;Q9Y4L1-2;J3KTF1;J3QL06;Q9BST8;J3QQH7;J3QLE9;A0A087X214;A0A087WW13;D3DSV6;Q9BXT5	A0A087X054;Q9Y4L1;E9PJ21;A0A087WWI4;K7EQK2;Q9Y4L1-2	Hypoxia up-regulated protein 1	HYOU1	24.4685	23.6843	25.5139	24.3017	25.8549	23.3882	24.1974	23.7803	23.7308	24.6188	24.5647	38	38	38	46	46	46	104.78	0	246.76	15877000000	378
180	A0A087X1E7;A0A087X078;V9H019;E9PHA6;P43246;V9H015;V9H0B2;P43246-2;C9J809	A0A087X1E7;A0A087X078;V9H019;E9PHA6;P43246;V9H015;V9H0B2;P43246-2;C9J809	DNA mismatch repair protein Msh2	MSH2	NaN	16.1729	14.4107	NaN	18.9269	17.3707	21.1708	17.3731	NaN	19.4749	17.7275	4	4	4	14	14	14	54.777	0.0004249	3.8781	508830000	11
181	A0A087X079	A0A087X079		IGHG1	NaN	NaN	NaN	NaN	20.5892	19.0003	20.9313	NaN	NaN	NaN	18.2964	21	1	0	53.7	2.5	0	51.912	0.00041693	3.624	106160000	2
182	A0A087X0C8;E7EV01;O15484;K7EP62;E9PS73	A0A087X0C8;E7EV01;O15484	Calpain-5	CAPN5	24.4157	19.0948	19.114	18.3171	19.3438	23.6426	17.1908	17.5353	NaN	NaN	16.9729	18	18	18	34.6	34.6	34.6	72.984	0	57.1	1650100000	48
183	A0A087X0D5;P09668;E9PKT6	A0A087X0D5;P09668;E9PKT6	Pro-cathepsin H;Cathepsin H mini chain;Cathepsin H;Cathepsin H heavy chain;Cathepsin H light chain	CTSH	18.9525	18.0806	NaN	23.4495	20.8304	20.4016	22.2406	NaN	21.6321	22.311	21.0043	5	5	5	19.2	19.2	19.2	36.269	0	22.573	496020000	14
184	A0A087X0H9;Q5T8P6-3;Q5T8P6-2;Q5T8P6;Q5T8P6-5;Q5T8P6-4;E2PSN0;U3KPZ7;Q5T8P6-6;Q9P2N5	A0A087X0H9;Q5T8P6-3;Q5T8P6-2;Q5T8P6;Q5T8P6-5;Q5T8P6-4	RNA-binding protein 26	RBM26	17.9153	17.7265	19.8682	NaN	20.1246	13.0856	16.955	16.9191	19.3072	NaN	18.7184	6	6	6	6.9	6.9	6.9	113.79	0	10.097	156160000	11
185	A0A087X0K0;P39059	A0A087X0K0;P39059	Collagen alpha-1(XV) chain;Restin;Restin-2;Restin-3;Restin-4	COL15A1	22.2685	20.3848	24.4022	20.1206	24.7129	21.4215	23.3549	22.0678	22.4918	22.9404	23.4078	15	15	15	13.4	13.4	13.4	140.06	0	211.85	5489800000	154
186	A0A087X0K9;G5E9E7;G3V1L9;Q07157-2;Q07157;H0Y3R8;H0YKB1;H0YLT6	A0A087X0K9;G5E9E7;G3V1L9;Q07157-2;Q07157	Tight junction protein ZO-1	TJP1	20.6811	19.2194	20.0547	19.3719	20.2229	20.0033	19.9635	20.265	18.9713	20.0709	19.9949	16	16	16	11.8	11.8	11.8	187.85	0	54.475	1280800000	58
187	A0A087X0M8;O00533;O00533-2;C9J905;H7C0J0;M0QYW5;M0R0D0;O43293-2;O43293	A0A087X0M8;O00533;O00533-2	Neural cell adhesion molecule L1-like protein;Processed neural cell adhesion molecule L1-like protein	CHL1	21.037	21.0479	NaN	19.3352	NaN	22.4881	15.4633	17.4256	16.4758	NaN	16.8373	13	13	13	15.5	15.5	15.5	130.79	0	51.668	652260000	19
188	A0A087X0N5	A0A087X0N5			21.958	23.5254	21.8898	22.1612	23.0427	21.8606	23.9121	NaN	NaN	22.6769	22.9101	2	2	1	30.9	30.9	12.4	10.494	0	57.638	395400000	63
189	A0A087X0P6;A0A075B6S2	A0A087X0P6;A0A075B6S2		IGKV2D-29	22.6068	25.0681	23.1972	22.6148	20.3294	22.517	24.9842	NaN	21.4959	22.9137	21.2612	3	3	1	43.1	43.1	23.5	11.192	0	7.4532	884330000	4
190	A0A087X0S5;P12109	A0A087X0S5;P12109	Collagen alpha-1(VI) chain	COL6A1	27.7904	26.5134	28.4535	24.9745	28.2528	27.6808	28.3963	27.917	27.3324	27.4703	27.5987	41	41	41	48.4	48.4	48.4	108.34	0	323.31	180200000000	2038
191	A0A087X0V5;P29728-2;P29728;F8W1C5;P29728-3	A0A087X0V5;P29728-2;P29728	2-5-oligoadenylate synthase 2	OAS2	23.4367	16.3513	22.9507	17.822	22.6978	22.7379	21.8913	22.9571	21.074	20.7125	23.444	14	14	14	21.8	21.8	21.8	83.234	0	37.169	2736200000	45
192	A0A087X0V8;Q59EK9-4;Q59EK9-2;Q59EK9-3;Q59EK9	A0A087X0V8;Q59EK9-4;Q59EK9-2;Q59EK9-3;Q59EK9	RUN domain-containing protein 3A	RUNDC3A	NaN	NaN	18.5146	NaN	18.7467	NaN	NaN	NaN	NaN	NaN	NaN	1	1	1	3	3	3	45.553	0.0014222	3.3321	19545000	2
193	A0A087X0W7;Q86TX2;G3V4F2;A0A087WT95;P49753;P49753-2	A0A087X0W7;Q86TX2;G3V4F2;A0A087WT95;P49753;P49753-2	Acyl-coenzyme A thioesterase 1;Acyl-coenzyme A thioesterase 2, mitochondrial	ACOT2;ACOT1	21.8423	21.5213	21.0522	21.4581	21.5846	21.0057	20.4825	21.4682	21.7386	20.1765	20.3258	9	9	9	27.1	27.1	27.1	46.292	0	31.031	803320000	40
194	J3KN36;A0A087X117;Q5JPE7-2;Q15155;P69849;Q5JPE7;A0A087WW46;Q5JPE7-3;A0A087WTD5;H3BUC9;H3BPS9	J3KN36;A0A087X117;Q5JPE7-2;Q15155;P69849;Q5JPE7;A0A087WW46;Q5JPE7-3	Nodal modulator 2;Nodal modulator 1;Nodal modulator 3	NOMO3;NOMO1;NOMO2	22.3599	21.2295	22.2482	21.8733	22.414	20.5595	22.6694	22.5803	22.0924	22.4724	22.4299	22	22	22	23.4	23.4	23.4	139.38	0	134.04	4454900000	138
195	A0A087X142;A6NMH6;A6NFQ9;F8W8I8;Q92599-2;Q92599-4;Q92599;Q92599-3;C9JV02;C9J4G8	A0A087X142;A6NMH6;A6NFQ9;F8W8I8;Q92599-2;Q92599-4;Q92599;Q92599-3	Septin-8	2008-09-01	24.0695	20.4419	22.0718	20.1939	22.3328	23.9488	22.2345	21.3912	21.4564	21.5579	22.5269	11	7	7	28.6	19.2	19.2	49.355	0	92.709	1783100000	37
196	A0A087X176;Q6ZRP7;H0Y430	A0A087X176;Q6ZRP7	Sulfhydryl oxidase;Sulfhydryl oxidase 2	QSOX2	NaN	16.0175	21.7312	15.5459	22.2526	NaN	NaN	16.193	14.898	NaN	NaN	11	11	11	20.8	20.8	20.8	77.249	0	51.208	421130000	31
197	A0A087X1A2;Q3SYF9	A0A087X1A2;Q3SYF9	Keratin-associated protein 19-7	KRTAP19-7	NaN	23.5689	21.6793	25.5214	NaN	NaN	NaN	NaN	NaN	NaN	NaN	1	1	1	15.3	15.3	15.3	7.5903	0.0074599	2.3686	191890000	1
198	A0A087X1B2;B9A018;Q53GS9;Q53GS9-2;Q53GS9-3;A0A087WW31;C9JIU2;F8WC91	A0A087X1B2;B9A018;Q53GS9;Q53GS9-2;Q53GS9-3	U4/U6.U5 tri-snRNP-associated protein 2	USP39	20.3806	21.5169	21.9294	20.8192	22.6581	18.0725	19.8117	18.9936	18.0773	20.6834	19.8881	11	11	11	33.5	33.5	33.5	56.399	0	90.983	622850000	28
199	A0A087X1B7;Q9Y3Y2-4;Q9Y3Y2;Q9Y3Y2-3;X6R700;Q5T7Y7	A0A087X1B7;Q9Y3Y2-4;Q9Y3Y2;Q9Y3Y2-3;X6R700	Chromatin target of PRMT1 protein	CHTOP	23.0845	24.8858	24.2604	24.2302	24.6305	NaN	NaN	22.3401	NaN	21.5017	22.4007	5	5	5	59.2	59.2	59.2	8.5199	0	53.552	839520000	22
200	A0A087X1G7;O60613	A0A087X1G7;O60613	15 kDa selenoprotein	2015-09-01	20.4437	NaN	20.9347	20.4635	20.7123	NaN	20.417	NaN	NaN	20.5702	NaN	2	2	2	13.4	13.4	13.4	17.942	0.00021552	4.0988	85962000	4
201	A0A087X1I8;Q7Z3E5-2;Q7Z3E5;H7C3U7;H7BZY2;C9J535;C9JW07;H7BZA2	A0A087X1I8;Q7Z3E5-2;Q7Z3E5;H7C3U7;H7BZY2	LisH domain-containing protein ARMC9	ARMC9	NaN	NaN	NaN	14.6345	NaN	19.0145	NaN	NaN	NaN	NaN	16.2296	5	5	5	6.1	6.1	6.1	91.818	0	7.0821	34752000	5
202	E9PNE4;A0A087X1J4;Q2MV58-6;Q2MV58-5;Q2MV58-4;Q2MV58-3;Q2MV58;Q2MV58-2	E9PNE4;A0A087X1J4;Q2MV58-6;Q2MV58-5;Q2MV58-4;Q2MV58-3;Q2MV58;Q2MV58-2	Tectonic-1	TCTN1	NaN	NaN	19.2427	NaN	18.5867	NaN	NaN	NaN	NaN	NaN	NaN	1	1	1	5.7	5.7	5.7	28.315	0.0016097	3.2189	8112300	1
203	A0A087X1J7;P22352;H0YBE4;E5RG32;H0YC19	A0A087X1J7;P22352	Glutathione peroxidase;Glutathione peroxidase 3	GPX3	24.8809	21.3804	24.2818	21.7008	25.0447	24.5317	23.6735	23.3631	23.7826	23.1402	23.902	7	7	7	35.1	35.1	35.1	25.402	0	27.828	2682000000	102
204	A0A087X1K9;O75608-2;O75608;E5RGR0;B4DP64;E5RJ48;E5RI35	A0A087X1K9;O75608-2;O75608;E5RGR0;B4DP64	Acyl-protein thioesterase 1	LYPLA1	22.2253	21.4634	21.0192	20.4359	21.2515	21.3258	22.2274	22.8003	22.9659	22.5418	22.27	6	6	6	54.2	54.2	54.2	17.981	0	13.572	557330000	22
205	A0A087X1L7;O00292-2;O00292;O75610;A0A087WW09	A0A087X1L7;O00292-2;O00292	Left-right determination factor 2	LEFTY2	20.2423	NaN	23.0583	NaN	20.1892	NaN	NaN	NaN	NaN	15.8908	NaN	7	7	7	21.8	21.8	21.8	41.727	0	26.104	224620000	9
206	A0A087X1N2;Q03701	A0A087X1N2;Q03701	CCAAT/enhancer-binding protein zeta	CEBPZ	19.0167	19.7664	18.4501	18.304	18.7485	NaN	NaN	18.6552	NaN	NaN	18.3286	4	4	4	5.2	5.2	5.2	114.16	0	24.957	176400000	13
207	A0A087X1R5;Q13123;D6REL4;Q9H4P6;E7EQZ7	A0A087X1R5;Q13123;D6REL4;Q9H4P6;E7EQZ7	Protein Red	IK	18.9514	21.6502	20.778	20.1582	21.1266	17.9377	17.16	19.665	17.5715	18.4849	18.4779	6	6	6	12.2	12.2	12.2	65.654	0	13.292	328570000	17
208	A0A087X1S7;P09326;P09326-2	A0A087X1S7;P09326;P09326-2	CD48 antigen	CD48	19.2695	NaN	17.2916	NaN	NaN	NaN	18.9956	NaN	17.4962	15.9242	18.0802	2	2	2	9.5	9.5	9.5	28.855	0.00062279	3.5712	64217000	2
209	A0A087X1U6	A0A087X1U6		EPPK1	NaN	NaN	NaN	13.5808	NaN	NaN	NaN	NaN	NaN	NaN	NaN	97	1	0	50.6	0.5	0	555.65	0.0079733	2.3025	3822900	1
210	A0A087X1V9;P01617	A0A087X1V9;P01617	Ig kappa chain V-II region TEW	IGKC	20.135	21.3743	NaN	18.9108	20.4371	NaN	21.473	NaN	NaN	20.7558	NaN	2	1	1	36.3	23.5	23.5	11.043	0	21.696	62782000	8
211	A0A087X1Z3;Q9UL46;H0YM70;H0YKU2	A0A087X1Z3;Q9UL46;H0YM70	Proteasome activator complex subunit 2	PSME2	21.7411	22.5396	23.5949	21.8754	23.3604	20.5767	23.3458	19.7179	21.7491	23.4264	21.897	8	8	8	39.4	39.4	39.4	29.126	0	41.944	1450400000	71
212	A0A087X232;P09871;F8WCZ6;H0Y5D1;F5H7T4;B5MCV4	A0A087X232;P09871;F8WCZ6	Complement C1s subcomponent;Complement C1s subcomponent heavy chain;Complement C1s subcomponent light chain	C1S	20.4272	19.9142	20.0376	20.938	18.2492	21.5706	22.8062	NaN	19.3364	20.3887	21.5095	9	9	9	14.5	14.5	14.5	75.905	0	24.055	888060000	31
213	A0A087X241;Q2NKQ1-4;Q2NKQ1;Q2NKQ1-3	A0A087X241;Q2NKQ1-4;Q2NKQ1;Q2NKQ1-3	Small G protein signaling modulator 1	SGSM1	NaN	NaN	17.3937	NaN	17.2842	NaN	NaN	NaN	NaN	NaN	NaN	1	1	1	1.1	1.1	1.1	122.91	0.0016064	3.2026	18913000	1
214	C9J453;A0A087X255;O15344-2;O15344	C9J453;A0A087X255;O15344-2;O15344	E3 ubiquitin-protein ligase Midline-1	MID1	NaN	NaN	NaN	NaN	NaN	18.4441	NaN	19.8197	NaN	NaN	20.1929	2	2	2	4.6	4.6	4.6	54.502	0.0012262	3.3898	100310000	1
215	A0A087X256;Q2M389;Q2M389-2;F8W1W1;REV__H3BQW8;F8VYH7;REV__B1ANM7;REV__Q9UNN5-2;REV__Q9UNN5;Q8NA03	A0A087X256;Q2M389;Q2M389-2	WASH complex subunit 7	KIAA1033	18.6098	17.2769	18.3253	15.9945	18.2969	19.2031	19.3697	17.5489	17.9651	18.3441	18.5967	10	10	10	10.3	10.3	10.3	136.5	0	13.156	344110000	28
216	A0A087X271;B4DDF4;B4DUT8;Q99439;H3BVI6;Q99439-2;K7ES69;A0A087X1X5;H3BQH0;A0A087WV51;U3KPS3	A0A087X271;B4DDF4;B4DUT8;Q99439;H3BVI6;Q99439-2;K7ES69;A0A087X1X5	Calponin;Calponin-2	CNN2	23.3838	22.9923	22.3194	23.397	21.6672	22.383	23.5476	23.3008	22.203	23.1269	23.6586	7	7	7	45.8	45.8	45.8	19.757	0	25.783	1199000000	19
217	A0A087X294;O75914-2;O75914;O75914-4;O75914-3;B1AKS5;H7C1X3	A0A087X294;O75914-2;O75914;O75914-4;O75914-3	Non-specific serine/threonine protein kinase;Serine/threonine-protein kinase PAK 3	PAK3	NaN	NaN	19.3483	NaN	18.7234	NaN	NaN	NaN	NaN	NaN	NaN	5	2	2	11.8	5	5	60.626	0	5.6054	29707000	3
218	E9PDU5;A0A087X295;Q9NNW5;E9PBK6	E9PDU5;A0A087X295;Q9NNW5;E9PBK6	WD repeat-containing protein 6	WDR6	NaN	NaN	15.7898	16.0286	18.2654	18.292	NaN	16.6985	NaN	15.3781	NaN	3	3	3	3.9	3.9	3.9	116.17	0	7.9044	46332000	2
219	A0A087X2C0;A0A075B7F0;P01763;P01767;P01781	A0A087X2C0		IGHM	25.7004	26.1686	24.5165	24.8206	25.114	24.4713	28.5448	23.3242	23.9417	26.2296	25.743	22	20	0	45.2	41.5	0	64.106	0	323.31	28771000000	256
220	A0A087X2D5;Q9BRJ2;A0A087WU62	A0A087X2D5;Q9BRJ2;A0A087WU62	39S ribosomal protein L45, mitochondrial	MRPL45	22.4644	20.5418	21.1559	20.4834	21.583	19.6724	22.0707	22.1572	21.6379	20.8252	21.902	8	8	8	32	32	32	35.29	0	13.032	756830000	26
221	A0A087X2F9;Q7Z4I7-4;Q7Z4I7-3;Q7Z4I7;Q7Z4I7-5;Q7Z4I7-2	A0A087X2F9;Q7Z4I7-4;Q7Z4I7-3;Q7Z4I7;Q7Z4I7-5;Q7Z4I7-2	LIM and senescent cell antigen-like-containing domain protein 2	LIMS2	NaN	NaN	17.85	NaN	18.1739	NaN	NaN	NaN	NaN	NaN	NaN	5	1	1	22.9	6.4	6.4	28.372	0.0084559	2.2124	7447600	2
222	F1T0B3;A0A087X2G1;Q92499;Q92499-3;Q92499-2	F1T0B3;A0A087X2G1;Q92499;Q92499-3;Q92499-2	ATP-dependent RNA helicase DDX1	DDX1	23.7485	24.3388	24.9055	24.3752	24.7093	22.7323	22.9028	22.9612	22.5402	22.7861	22.9515	30	30	30	55.8	55.8	55.8	73.915	0	249.12	7426900000	231
223	A0A087X2I1;P62333;H0YJC0;H0YJS8;H0YJX2;H0YJE9;H0YJT1	A0A087X2I1;P62333;H0YJC0	26S protease regulatory subunit 10B	PSMC6	21.9845	22.9228	23.6391	22.473	23.6364	21.7971	22.2146	21.3711	22.0865	22.4903	21.028	13	13	13	38.5	38.5	38.5	45.796	0	52.544	2044200000	56
224	A0A088AWL3;O75376-2;O75376;E7EVU5;E7EW50;J3KS51;E7EVK1;O75376-3	A0A088AWL3;O75376-2;O75376	Nuclear receptor corepressor 1	NCOR1	21.9532	15.3116	17.5842	16.317	18.7582	24.5991	16.4649	16.9666	16.2329	16.2156	16.4446	3	3	3	1.8	1.8	1.8	258.98	0.0017864	3.0634	4524700000	5
225	A0A088AWN3;Q9BZ29-3;Q9BZ29-5;Q9BZ29;Q9BZ29-4;Q9BZ29-6;Q5JUD8;H0Y3S1;X6RGR3;H7BZ79	A0A088AWN3;Q9BZ29-3;Q9BZ29-5;Q9BZ29;Q9BZ29-4;Q9BZ29-6	Dedicator of cytokinesis protein 9	DOCK9	NaN	NaN	12.9907	NaN	14.434	NaN	16.973	18.4181	18.4993	16.8011	16.7847	7	5	5	5.2	4.3	4.3	237.75	0	18.012	144620000	12
226	A0A096LNH6;Q14185	A0A096LNH6;Q14185	Dedicator of cytokinesis protein 1	DOCK1	14.6788	16.2842	NaN	15.739	14.0606	13.117	15.2334	15.4216	14.6505	14.441	14.3327	4	4	4	2.4	2.4	2.4	217.75	0	5.3253	40862000	3
227	A0A096LNZ9;A0A096LPJ4;P05161	A0A096LNZ9;A0A096LPJ4;P05161	Ubiquitin-like protein ISG15	ISG15	22.5528	21.6708	23.1865	21.3589	20.5751	23.9822	22.343	20.861	22.3921	21.7963	23.1451	4	4	4	35.4	35.4	35.4	15.675	0	24.214	748120000	30
228	A0A096LP22;Q86Y79;A0A096LPA3;C9J7Z1	A0A096LP22;Q86Y79;A0A096LPA3;C9J7Z1	Probable peptidyl-tRNA hydrolase	PTRH1	19.7746	18.5736	19.4009	19.2896	20.0833	20.7031	NaN	NaN	NaN	NaN	NaN	2	2	2	14.5	14.5	14.5	18.43	0.0042373	2.698	65258000	7
229	A0A096LP25;A0A096LNZ0;Q6ZSR9	A0A096LP25;A0A096LNZ0;Q6ZSR9	Uncharacterized protein FLJ45252	AAK1	20.0878	19.28	20.25	18.7705	20.7429	17.4329	NaN	NaN	NaN	19.4146	19.759	4	4	4	12.9	12.9	12.9	54.448	0	6.6634	167110000	10
230	A0A096LP30;Q8NDA2;Q8NDA2-2;Q8NDA2-3	A0A096LP30;Q8NDA2;Q8NDA2-2;Q8NDA2-3	Hemicentin-2	HMCN2	NaN	17.521	NaN	14.3286	NaN	NaN	NaN	NaN	NaN	NaN	NaN	4	4	4	0.9	0.9	0.9	541.97	0	6.4697	51955000	4
231	A0A096LP69;A8MQT7;H7C2F2;P14209-2	A0A096LP69;A8MQT7;H7C2F2;P14209-2	CD99 antigen	CD99	20.3195	NaN	NaN	NaN	NaN	18.8628	NaN	NaN	NaN	NaN	NaN	2	1	1	23.9	7.1	7.1	18.777	0.0012298	3.4276	10711000	2
232	A0A096LPE2;P35542	A0A096LPE2;P35542	Serum amyloid A-4 protein	SAA2-SAA4;SAA4	NaN	21.5064	21.9056	21.3249	21.0171	20.6172	19.7743	NaN	NaN	21.346	20.1118	3	3	1	13.5	13.5	3.8	23.353	0.00062202	3.5605	267600000	2
233	A0A096LPI6;A0A096LNH5;H7C2G3;A0A096LP73;A0A096LNJ1;A0A096LP12	A0A096LPI6;A0A096LNH5;H7C2G3		C21orf33	25.3977	24.5774	24.4761	24.4953	24.7551	22.5092	25.461	24.9296	25.1104	24.2296	24.7263	11	11	0	66	66	0	25.64	0	243.49	5200900000	135
234	P98088;A0A096LPK4	P98088;A0A096LPK4	Mucin-5AC	MUC5AC	NaN	NaN	NaN	NaN	NaN	NaN	NaN	NaN	NaN	NaN	15.0822	3	3	3	3.6	3.6	3.6	526.6	0	6.3865	38675000	5
235	A0A5E8;Q99501-3;Q99501-2;Q99501-4;Q99501	A0A5E8;Q99501-3;Q99501-2;Q99501-4;Q99501	GAS2-like protein 1	GAS2L1	NaN	NaN	NaN	NaN	NaN	20.0269	NaN	NaN	NaN	16.9323	NaN	4	4	4	8.2	8.2	8.2	72.688	0	7.1336	57739000	5
236	B7Z2T3;B7Z6R6;A0AVF1-2;A0AVF1-3;A0AVF1	B7Z2T3;B7Z6R6;A0AVF1-2;A0AVF1-3;A0AVF1	Intraflagellar transport protein 56	TTC26	15.8039	NaN	16.5297	NaN	18.2869	17.451	NaN	NaN	NaN	NaN	NaN	2	2	2	8	8	8	48.788	0.0014159	3.2779	18223000	4
237	F8WC54;A0AVL1;Q13443-2;Q13443	F8WC54;A0AVL1;Q13443-2;Q13443	Disintegrin and metalloproteinase domain-containing protein 9	ADAM9	17.6562	16.2797	NaN	20.0761	NaN	18.2418	19.5766	19.2163	19.1434	19.5981	19.2596	4	4	4	11.3	11.3	11.3	69.323	0	10.528	191500000	14
238	A0AVT1;A0AVT1-2;H0Y8S8;A0AVT1-4;H0Y9U5	A0AVT1;A0AVT1-2	Ubiquitin-like modifier-activating enzyme 6	UBA6	19.3121	19.0328	20.5741	19.621	20.7142	19.3691	20.3409	18.9408	19.3536	20.6175	17.8771	14	14	11	16.9	16.9	13	117.97	0	33.742	680500000	47
239	A0MZ66;A0MZ66-3;A0MZ66-2;A0MZ66-4;A0MZ66-5;A0MZ66-6;A0MZ66-8;A0MZ66-7	A0MZ66;A0MZ66-3;A0MZ66-2;A0MZ66-4;A0MZ66-5;A0MZ66-6;A0MZ66-8	Shootin-1	KIAA1598	18.0262	20.2202	17.2501	16.7444	17.8599	19.0676	NaN	17.5879	NaN	NaN	NaN	5	5	5	10.1	10.1	10.1	71.639	0	5.3681	124480000	7
240	H0YA46;D6RA81;A1E959	H0YA46;D6RA81;A1E959	Odontogenic ameloblast-associated protein	ODAM	NaN	NaN	NaN	26.2944	NaN	20.6357	NaN	NaN	NaN	22.3497	NaN	2	2	2	16.2	16.2	16.2	23.872	0	41.289	446360000	17
241	A1IGU5	A1IGU5	Rho guanine nucleotide exchange factor 37	ARHGEF37	NaN	18.3716	NaN	17.571	16.687	20.1924	NaN	NaN	NaN	16.425	NaN	3	3	3	6.1	6.1	6.1	76.277	0.005137	2.5893	82798000	2
242	A1L0T0;M0R026;E9PJS0;M0R1B5;E9PL44;M0QZX5;E9PNL1	A1L0T0;M0R026;E9PJS0	Acetolactate synthase-like protein	ILVBL	23.3446	21.8954	23.2213	22.8926	23.6494	22.4314	21.6031	20.9895	23.3481	21.3959	22.1162	13	13	13	28.6	28.6	28.6	67.867	0	168.5	2327000000	79
243	A1L4H1;A0A087WU72;A1L4H1-2;M0QZ17	A1L4H1;A0A087WU72;A1L4H1-2	Soluble scavenger receptor cysteine-rich domain-containing protein SSC5D	SSC5D	17.1584	16.5252	20.1094	17.5761	20.5541	18.1556	NaN	NaN	16.3074	NaN	NaN	8	8	8	7.9	7.9	7.9	165.74	0	14.23	215760000	9
244	A1X283;G3V144;H0Y507;Q5TCZ1-3;Q5TCZ1	A1X283	SH3 and PX domain-containing protein 2B	SH3PXD2B	18.8522	18.4092	15.3201	18.3913	17.1185	21.2274	19.1789	19.8681	18.7546	19.4562	19.6749	8	8	8	10.9	10.9	10.9	101.58	0	15.952	453020000	23
245	E5RID3;E5RGD0;H0YC32;A1XBS5-2;A1XBS5-4;A1XBS5-3;A1XBS5	E5RID3;E5RGD0;H0YC32;A1XBS5-2;A1XBS5-4;A1XBS5-3;A1XBS5	Protein FAM92A1	FAM92A1	NaN	NaN	NaN	NaN	NaN	20.2254	NaN	NaN	NaN	NaN	NaN	1	1	1	10.9	10.9	10.9	12.978	0.001599	3.1392	11033000	1
246	A2A274;Q99798	A2A274;Q99798	Aconitate hydratase, mitochondrial	ACO2	26.959	25.5364	25.345	25.7266	25.4386	25.3476	26.0829	26.457	26.6732	25.9048	26.2551	41	41	41	56.1	56.1	56.1	87.819	0	323.31	35204000000	895
247	A2A283;F8WCE4;B5MCD7;O43759-2;O43759	A2A283;F8WCE4;B5MCD7;O43759-2;O43759	Synaptogyrin-1	SYNGR1	NaN	NaN	20.9678	NaN	22.2041	21.8781	NaN	NaN	NaN	NaN	NaN	1	1	1	10.2	10.2	10.2	12.79	0.0072748	2.3719	63902000	6
248	A2A2D0;P16949;P16949-2;E5RGX5;Q93045;Q93045-2	A2A2D0;P16949;P16949-2;E5RGX5;Q93045;Q93045-2	Stathmin;Stathmin-2	STMN1;STMN2	18.5771	21.6389	NaN	22.0035	21.3072	NaN	NaN	NaN	NaN	18.7861	NaN	2	2	2	26.7	26.7	26.7	9.8642	0.0058325	2.457	65448000	2
249	S4R350;A2A2G4;Q9Y672	S4R350;A2A2G4;Q9Y672	Dolichyl pyrophosphate Man9GlcNAc2 alpha-1,3-glucosyltransferase	ALG6	21.2835	21.3066	21.425	21.0852	21.4137	20.2612	21.3786	21.4635	21.1533	21.3549	21.289	3	3	3	11.7	11.7	11.7	32.235	0	5.9992	410410000	13
250	A2A2R0;Q8TDL5	A2A2R0;Q8TDL5	BPI fold-containing family B member 1	BPIFB1	NaN	NaN	NaN	NaN	19.7608	NaN	NaN	NaN	NaN	NaN	19.6779	1	1	1	10.2	10.2	10.2	15.899	0.0063658	2.4107	30090000	5
251	A2A2V1;P04156-2;P04156;X6RKS3	A2A2V1;P04156-2;P04156;X6RKS3	Major prion protein	PRNP	23.4411	19.1405	23.4472	21.353	23.6906	21.9683	NaN	NaN	19.5342	NaN	19.3831	5	5	5	21.3	21.3	21.3	27.278	0	54.305	635360000	22
252	A2AAZ0;Q5Y7D6;Q5SU54;A2AAY8;E9PIB1	A2AAZ0;Q5Y7D6;Q5SU54		HLA-DQB1	22.6641	NaN	20.4564	22.3808	NaN	NaN	19.461	NaN	23.4912	NaN	19.3193	7	5	5	43.8	38.4	38.4	25.961	0	74.903	400700000	21
253	A2AB90;O15533-2;O15533;O15533-3;O15533-4;Q6P1N7;C9JA35;REV__Q8WY36-3	A2AB90;O15533-2;O15533;O15533-3;O15533-4	Tapasin	TAPBP	26.0623	24.804	23.5989	24.6141	22.6691	24.8043	26.1354	25.1899	25.5327	25.1669	25.5415	7	7	7	17.8	17.8	17.8	49.491	0	47.291	7339700000	59
254	A2ACR1;P28065-2;P28065;A2ACR0	A2ACR1;P28065-2;P28065	Proteasome subunit beta type;Proteasome subunit beta type-9	PSMB9	21.1732	20.651	20.8641	17.6561	20.3105	22.0452	22.0233	NaN	20.2008	NaN	19.957	3	3	3	14.3	14.3	14.3	20.96	0	7.7533	216570000	11
255	A2IDA3;P29372-5;P29372-4;P29372-2;P29372	A2IDA3;P29372-5;P29372-4;P29372-2;P29372	DNA-3-methyladenine glycosylase	MPG	17.8624	19.6987	21.5471	19.1407	21.4224	22.1703	17.57	17.4954	NaN	17.8256	17.567	5	5	5	27.5	27.5	27.5	27.295	0	12.846	175300000	14
256	A2RRP1-2;A2RRP1;H0Y5G7;H7C1Y9;H7BZR3;H7BZU5;C9JCM7	A2RRP1-2;A2RRP1;H0Y5G7	Neuroblastoma-amplified sequence	NBAS	19.3025	18.3617	19.1556	18.8292	20.1176	17.0054	19.6684	18.8204	19.4526	19.3598	18.7502	13	13	13	7.2	7.2	7.2	254.81	0	28.092	827570000	50
257	B7ZLP8;A2RTX5;A2RTX5-2;H0YKB9	B7ZLP8;A2RTX5;A2RTX5-2	Probable threonine--tRNA ligase 2, cytoplasmic	TARSL2	19.5106	16.0729	16.5161	17.7588	18.8011	17.914	17.396	NaN	16.4627	16.2762	NaN	6	4	4	8.4	6.3	6.3	88.743	0	7.6907	128080000	13
258	F8WA11;Q7Z460-2;Q7Z460-4;A2RU21;Q7Z460-3;Q7Z460;H0Y5T1	F8WA11;Q7Z460-2;Q7Z460-4;A2RU21;Q7Z460-3;Q7Z460;H0Y5T1	CLIP-associating protein 1	CLASP1	NaN	NaN	17.7738	NaN	16.7012	NaN	NaN	NaN	NaN	NaN	NaN	4	2	2	3.4	1.3	1.3	162.76	0.00082816	3.5392	33065000	2
259	A2RU67;Q69YM1	A2RU67;Q69YM1	Uncharacterized protein KIAA1467	KIAA1467;DKFZp762C0813	NaN	NaN	19.3438	NaN	18.9907	NaN	NaN	NaN	NaN	NaN	16.8861	2	2	2	4.8	4.8	4.8	67.038	0	12.573	37915000	3
260	A3KFL2;A3KFL1;A3KFL5;Q13868-2;Q13868	A3KFL2;A3KFL1;A3KFL5;Q13868-2;Q13868	Exosome complex component RRP4	EXOSC2	NaN	16.8381	17.2561	NaN	17.2068	17.4816	16.1514	22.3987	NaN	NaN	21.5259	2	2	2	8.8	8.8	8.8	31.994	0	7.6406	156900000	4
261	A3KMH1-3;A3KMH1;A3KMH1-2	A3KMH1-3;A3KMH1;A3KMH1-2	von Willebrand factor A domain-containing protein 8	VWA8	20.5919	18.5921	20.6312	19.5815	20.4036	18.3126	21.4931	21.1953	20.4478	19.9223	21.3971	26	26	26	17.5	17.5	17.5	210.92	0	60.972	2153500000	81
262	K7ES28;Q9Y2G9-3;Q9Y2G9;A3KN83-3;A3KN83-2;A3KN83;A3KN83-4	K7ES28;Q9Y2G9-3;Q9Y2G9;A3KN83-3;A3KN83-2;A3KN83;A3KN83-4	Protein strawberry notch homolog 2;Protein strawberry notch homolog 1	SBNO2;SBNO1	18.9499	18.6653	NaN	19.5449	16.5987	17.4988	19.7098	19.2263	19.3504	NaN	19.8163	3	3	3	2.3	2.3	2.3	149.09	0.001593	3.1121	400370000	3
263	A4D1K4;Q5VSL9-2;Q9ULQ0-2;Q9ULQ0;Q5VSL9;Q5VSL9-3	A4D1K4;Q5VSL9-2;Q9ULQ0-2;Q9ULQ0;Q5VSL9;Q5VSL9-3	Striatin-interacting protein 1;Striatin-interacting protein 2	FAM40B;STRIP1;STRIP2	18.9686	19.0124	18.1742	18.8391	18.2283	18.1613	19.182	NaN	18.6753	19.2718	18.3701	2	2	2	2.2	2.2	2.2	101.8	0.00082713	3.5231	206340000	8
264	C9J1X0;A4D1P6-3;A4D1P6-2;A4D1P6	C9J1X0;A4D1P6-3;A4D1P6-2;A4D1P6	WD repeat-containing protein 91	WDR91	NaN	17.7725	17.5337	NaN	17.2423	NaN	NaN	14.3029	NaN	NaN	NaN	2	2	2	4.2	4.2	4.2	79.239	0.00022217	4.5142	25912000	4
265	A4FU01-3;A4FU01-2;A4FU01-6;A4FU01-4;A4FU01;A4FU01-5	A4FU01-3;A4FU01-2;A4FU01-6;A4FU01-4;A4FU01;A4FU01-5	Myotubularin-related protein 11	MTMR11	NaN	NaN	NaN	NaN	NaN	19.3968	NaN	NaN	NaN	NaN	NaN	2	2	2	8.3	8.3	8.3	26.884	0.00042599	3.9235	11735000	2
266	F5H4Q5;A5D8V6	F5H4Q5;A5D8V6	Vacuolar protein sorting-associated protein 37C	VPS37C	20.767	19.3499	19.9991	19.3163	20.0319	19.8655	19.7983	19.7654	19.3713	19.5406	19.6711	2	2	2	15.5	15.5	15.5	17.143	0.00021427	4.0207	80874000	2
267	Q5TGE2;A5PLL7-2;A5PLL7	Q5TGE2;A5PLL7-2;A5PLL7	Transmembrane protein 189	TMEM189	20.0507	18.5151	NaN	20.569	19.3976	NaN	20.1536	20.706	20.2568	19.9297	NaN	1	1	1	7.7	7.7	7.7	22.883	0.0056508	2.48	53014000	5
268	A5YKK6-2;A5YKK6;A5YKK6-3;A5YKK6-4;H3BMZ2;B5MDN3;H3BNB1	A5YKK6-2;A5YKK6;A5YKK6-3	CCR4-NOT transcription complex subunit 1	CNOT1	19.5939	19.7158	19.5682	18.4854	19.4141	15.3135	18.9974	18.8613	18.059	18.6187	18.8867	15	15	15	7.8	7.8	7.8	266.38	0	34.424	836160000	66
269	A6NC48;Q10588;H0Y984;Q10588-2;H0Y9Q9;H0Y8G4	A6NC48;Q10588;H0Y984;Q10588-2;H0Y9Q9;H0Y8G4	ADP-ribosyl cyclase/cyclic ADP-ribose hydrolase 2	BST1	21.3458	15.847	NaN	15.0574	19.3199	22.3603	21.056	20.7015	21.2022	18.9111	20.9388	6	6	6	21.9	21.9	21.9	37.482	0	38.672	555100000	29
270	H3BTL1;Q9GZQ8;A6NCE7	H3BTL1;Q9GZQ8;A6NCE7	Microtubule-associated proteins 1A/1B light chain 3B;Microtubule-associated proteins 1A/1B light chain 3 beta 2	MAP1LC3B;MAP1LC3B2	23.265	19.7268	21.601	20.5042	21.7739	23.3207	18.5896	NaN	19.5641	20.0671	NaN	3	1	1	37.3	18.7	18.7	9.0115	0.00021492	4.0527	177900000	9
271	A6ND22;Q9Y3D3-2;Q9Y3D3	A6ND22;Q9Y3D3-2;Q9Y3D3	28S ribosomal protein S16, mitochondrial	MRPS16	23.541	20.3524	22.8374	21.8206	22.794	NaN	22.8309	23.0274	22.3891	21.9912	23.5191	4	4	4	54.5	54.5	54.5	11.15	0	9.1144	523420000	9
272	A6NDF3;Q9BVG4	A6NDF3;Q9BVG4	Protein PBDC1	PBDC1	19.0716	20.8307	20.4433	19.4413	19.9429	19.2058	19.0753	18.354	18.3297	18.6085	18.718	2	2	2	9.1	9.1	9.1	26.644	0.0014136	3.2536	105960000	11
273	A6NEP9;Q8NG11-2;Q8NG11;H7BXY6;Q8NG11-3	A6NEP9;Q8NG11-2;Q8NG11	Tetraspanin;Tetraspanin-14	TSPAN14	20.4355	NaN	19.691	NaN	NaN	19.9875	20.5606	21.5388	20.7353	21.5646	20.2067	3	3	3	17	17	17	25.196	0.0015987	3.1363	163340000	4
274	A6NF31;O75665;O75665-2;O75665-3	A6NF31;O75665;O75665-2;O75665-3	Oral-facial-digital syndrome 1 protein	OFD1	19.4213	20.3825	18.1645	18.1712	NaN	NaN	17.2639	NaN	NaN	NaN	20.0054	3	3	3	2.3	2.3	2.3	100.96	0.0056529	2.4834	254170000	3
275	A6NFX8;Q9UKK9;A6NJU6;H0YEY4;A6NCQ0	A6NFX8;Q9UKK9;A6NJU6;H0YEY4;A6NCQ0	ADP-sugar pyrophosphatase	NUDT5	20.7254	18.3005	20.7681	20.1988	18.3581	21.8159	17.7651	17.1391	19.5585	17.6208	NaN	4	4	4	21.6	21.6	21.6	25.895	0	15.606	158150000	20
276	A6NGJ0;P51808;F2Z328	A6NGJ0;P51808	Dynein light chain Tctex-type 3	DYNLT3	23.7419	23.4209	24.3292	23.8181	24.0235	23.2247	22.534	22.5369	22.7472	23.1817	22.2101	3	3	3	21.7	21.7	21.7	16.979	0	101.02	774940000	16
277	H3BMM8;B4E1P3;H3BMT0;H3BTV5;H3BU16;A6NGP5;H3BMV3;Q9H910-2;Q9H910;B4DLH4	H3BMM8;B4E1P3;H3BMT0;H3BTV5;H3BU16;A6NGP5;H3BMV3;Q9H910-2;Q9H910;B4DLH4	Hematological and neurological expressed 1-like protein	HN1L	20.8969	NaN	NaN	NaN	NaN	NaN	NaN	NaN	NaN	NaN	20.7817	1	1	1	24.3	24.3	24.3	7.4362	0.0029166	2.8215	15021000	1
278	H3BPX2;A6NGQ3;Q5VST9-5;Q5VST9-3;Q5VST9;Q5VST9-2;Q5VST9-6	H3BPX2;A6NGQ3;Q5VST9-5;Q5VST9-3;Q5VST9;Q5VST9-2;Q5VST9-6	Obscurin	OBSCN	NaN	NaN	NaN	NaN	14.5328	NaN	NaN	NaN	NaN	NaN	NaN	1	1	1	0.1	0.1	0.1	972.99	0.0051448	2.5988	12160000	1
279	A6NGW1;O95070;E9PS11;E9PIZ0;C9JST7	A6NGW1;O95070;E9PS11;E9PIZ0;C9JST7	Protein YIF1A	YIF1A	NaN	NaN	18.6966	NaN	20.7302	NaN	19.1533	18.5804	NaN	19.4118	19.0766	2	2	2	14.1	14.1	14.1	26.377	0.005304	2.5459	35118000	5
280	A6NHL2-2;A6NHL2	A6NHL2-2;A6NHL2	Tubulin alpha chain-like 3	TUBAL3	NaN	19.2729	21.8628	NaN	NaN	17.636	NaN	NaN	NaN	NaN	NaN	4	2	2	12.3	8.4	8.4	45.517	0.0023627	2.9568	184200000	2
281	D6R9V6;A6NJ38;A6NHM7;Q7Z5H3-4;Q7Z5H3-3;Q7Z5H3;Q7Z5H3-5;Q7Z5H3-2	D6R9V6;A6NJ38;A6NHM7;Q7Z5H3-4;Q7Z5H3-3;Q7Z5H3;Q7Z5H3-5;Q7Z5H3-2	Rho GTPase-activating protein 22	ARHGAP22	20.7603	NaN	NaN	20.4292	17.6486	22.2646	21.2343	20.8872	22.0638	20.8025	19.704	2	2	2	2.8	2.8	2.8	56.669	0.0095448	2.1826	562980000	3
282	A6NHQ2;R4GMW7	A6NHQ2;R4GMW7	rRNA/tRNA 2-O-methyltransferase fibrillarin-like protein 1	FBLL1	22.8216	23.9639	24.2951	23.9352	24.7107	20.8596	20.8506	22.621	20.4634	21.5847	20.8929	12	10	10	38.7	35.4	35.4	34.675	0	64.162	2612500000	57
283	A6NHR9-2;A6NHR9;J3KTL8;A6NHR9-3	A6NHR9-2;A6NHR9;J3KTL8;A6NHR9-3	Structural maintenance of chromosomes flexible hinge domain-containing protein 1	SMCHD1	14.2082	14.5628	16.8188	13.5333	15.7818	NaN	15.7237	16.0532	13.4098	13.3051	16.8392	4	4	4	2.5	2.5	2.5	215.74	0	15.108	106440000	12
284	P14598;A6NI72;P14598-2;A8MVU1	P14598;A6NI72;P14598-2;A8MVU1	Neutrophil cytosol factor 1;Putative neutrophil cytosol factor 1B;Putative neutrophil cytosol factor 1C	NCF1;NCF1B;NCF1C	NaN	NaN	NaN	NaN	NaN	NaN	17.2067	15.7541	19.1309	NaN	16.2935	2	2	2	4.6	4.6	4.6	44.651	0.00021377	3.9733	25640000	6
285	A6NIH7;K7EJU3;K7EN86;C9JSK0;Q13432-2;Q13432	A6NIH7	Protein unc-119 homolog B	UNC119B	18.5885	NaN	17.9481	17.6686	16.7004	21.7319	NaN	NaN	NaN	NaN	15.3894	3	3	3	18.3	18.3	18.3	28.136	0.00022548	4.7322	80778000	3
286	A6NIW2;Q5JSL3	A6NIW2;Q5JSL3	Dedicator of cytokinesis protein 11	DOCK11	20.4846	NaN	19.6864	NaN	18.6229	20.5746	16.4401	NaN	19.0571	NaN	18.9597	11	11	9	6.6	6.6	5.9	238.1	0	27.624	815500000	22
287	A6NJD9;A8MVT4;A8MYK1;Q16540;H7C2P7	A6NJD9;A8MVT4;A8MYK1;Q16540;H7C2P7	39S ribosomal protein L23, mitochondrial	MRPL23	21.8331	19.866	21.1499	20.2668	21.119	18.9758	21.3612	21.5647	21.1885	20.7651	21.354	3	3	3	27.6	27.6	27.6	18.529	0	22.41	324780000	21
288	A6NKC4;P12314;A0A087WXZ6;Q92637;P12314-2;A0A087WVS4;A0A087WUG7;C9JSN8;Q92637-3;Q92637-2	A6NKC4;P12314;A0A087WXZ6;Q92637;P12314-2;A0A087WVS4;A0A087WUG7;C9JSN8;Q92637-3;Q92637-2	Putative high affinity immunoglobulin gamma Fc receptor IC;High affinity immunoglobulin gamma Fc receptor I;High affinity immunoglobulin gamma Fc receptor IB	FCGR1C;FCGR1A;FCGR1B	21.4299	19.0184	NaN	17.464	NaN	20.5225	22.0777	20.7984	20.9324	19.2235	20.9138	4	4	4	13.9	13.9	13.9	32.163	0	12.494	346780000	21
289	A6NLH6;Q9P003	A6NLH6;Q9P003	Protein cornichon homolog 4	CNIH4	25.062	25.0365	24.6128	24.6569	24.7108	23.9142	25.5602	25.5613	25.4635	25.5243	24.954	1	1	1	14.6	14.6	14.6	15.771	0	12.266	890560000	33
290	E9PJK1;E9PRJ8;H0YDL9;H0YDJ9;E9PIF1;A6NMH8;P60033;E9PM31;H0YEE2	E9PJK1;E9PRJ8;H0YDL9;H0YDJ9;E9PIF1;A6NMH8;P60033	Tetraspanin;CD81 antigen	CD81	26.1322	23.2743	24.0672	23.6707	24.8893	26.0546	23.936	24.5063	23.9615	23.3381	24.1975	4	4	4	40.6	40.6	40.6	17.963	0	234.44	2064000000	93
291	A6NNI4;G8JLH6;P21926;F5GXT1;A0A087WZG3;A0A087WU13	A6NNI4;G8JLH6;P21926	Tetraspanin;CD9 antigen	CD9	28.1126	28.2704	26.1635	28.1981	26.8862	27.7598	27.4955	27.4625	27.375	27.0854	26.7734	7	7	7	40.9	40.9	40.9	17.764	0	183.19	13481000000	145
292	A6NNK5;Q12888;Q12888-2;Q12888-3;C9JXV0;H7BZY0;H7C3N7;M0R142;H7C151;H7C495	A6NNK5;Q12888;Q12888-2;Q12888-3	Tumor suppressor p53-binding protein 1	TP53BP1	19.8111	20.515	22.5466	18.9708	22.5675	15.9345	15.7812	18.8841	NaN	17.4897	18.6094	29	29	29	22.3	22.3	22.3	209.02	0	323.31	1637500000	65
293	A6NNN6;E7ETA6;Q15154-2;Q15154;H0YBA1;E9PGW9;E7EV93;Q15154-3	A6NNN6;E7ETA6;Q15154-2;Q15154	Pericentriolar material 1 protein	PCM1	16.6788	19.2333	18.0023	NaN	18.9449	NaN	16.9768	16.6765	NaN	NaN	16.6081	6	6	6	3.4	3.4	3.4	210.13	0	9.1915	177600000	6
294	A6PVN5;Q15257-3;Q15257-2;Q15257;F6WIT2;A6PVN6;Q5T949;Q5T948;A6PVN9;Q68CR8;A6PVN8;C9IZ76;Q15257-4;B7ZBQ0;A6PVN7;B7ZBP9;B7ZBP7;B4DDQ6;H0Y6E5	A6PVN5;Q15257-3;Q15257-2;Q15257;F6WIT2;A6PVN6;Q5T949;Q5T948;A6PVN9;Q68CR8;A6PVN8;C9IZ76;Q15257-4	Serine/threonine-protein phosphatase 2A activator	PPP2R4;DKFZp781M17165	21.8947	21.9916	21.6778	21.9061	21.8758	21.513	22.3463	20.9158	21.4182	22.2703	18.7948	6	6	6	29.8	29.8	29.8	37.375	0	30.603	798350000	30
295	A6QRH7;Q5HY75;D3DWX8;P98173-3;P98173-2;P98173	A6QRH7;Q5HY75;D3DWX8;P98173-3;P98173-2;P98173	Protein FAM3A	FAM3A	NaN	NaN	21.0847	NaN	21.592	22.8853	NaN	NaN	NaN	NaN	NaN	2	2	2	11.7	11.7	11.7	17.362	0.0027338	2.8703	131330000	2
296	A6XMV5;Q9NP55	A6XMV5;Q9NP55	BPI fold-containing family A member 1	BPIFA1	NaN	NaN	19.8791	NaN	22.4152	NaN	NaN	NaN	NaN	NaN	21.0476	4	4	4	25.6	25.6	25.6	25.257	0	12.345	75990000	7
297	A6XND1;A6XND0;P17936;P17936-2;H0Y485;H0Y5K2;B3KWK7;C9JMX4	A6XND1;A6XND0;P17936;P17936-2;H0Y485;H0Y5K2;B3KWK7	Insulin-like growth factor-binding protein 3	IGFBP3	18.0394	19.4662	20.251	28.2814	20.2914	17.863	NaN	NaN	NaN	NaN	NaN	3	3	3	13.7	13.7	13.7	28.98	0	5.7223	5940000000	5
298	A6ZKI3;Q9BWD3;Q17RB0	A6ZKI3	Protein FAM127A	FAM127A	20.2681	NaN	20.7923	NaN	20.4307	24.1052	NaN	17.0103	18.1887	NaN	NaN	3	3	3	16.8	16.8	16.8	13.171	0.00042445	3.8652	189990000	7
299	A8K2U0;H0YGG5;A8K2U0-2;H0YH14;F5GXP1;F5GYG7	A8K2U0;H0YGG5;A8K2U0-2	Alpha-2-macroglobulin-like protein 1	A2ML1	23.2047	15.7771	NaN	21.5067	NaN	17.9002	21.9026	23.229	24.5081	20.0832	19.6433	32	32	32	29.6	29.6	29.6	161.1	0	169.67	3888600000	113
300	A8MQ02;J3KN01;P55196-1;P55196;P55196-5;Q5TIG5;P55196-2;P55196-6;P55196-3;H0Y8L4;H0Y9I0	A8MQ02;J3KN01;P55196-1;P55196;P55196-5;Q5TIG5;P55196-2;P55196-6;P55196-3	Afadin	MLLT4	18.1627	15.9248	18.8268	16.3326	19.0833	15.3151	19.0219	18.6023	18.6425	18.5896	18.6048	6	6	6	4.8	4.8	4.8	201.8	0	13.875	378950000	21
301	A8MT02;P14678-2;P14678;P14678-3;J3QLE5;P63162;P63162-2;J3KRY3;S4R3P3	A8MT02;P14678-2;P14678;P14678-3;J3QLE5;P63162;P63162-2;J3KRY3;S4R3P3	Small nuclear ribonucleoprotein-associated proteins B and B;Small nuclear ribonucleoprotein-associated protein N	SNRPB;SNRPN	24.512	25.637	25.5048	25.4117	25.7303	24.6642	23.6781	24.8187	23.4854	24.5985	24.3892	7	7	7	25.3	25.3	25.3	29.975	0	32.315	6705800000	88
302	M0QYV0;A8MT37;P49840	M0QYV0;A8MT37;P49840	Glycogen synthase kinase-3 alpha	GSK3A	19.064	17.9841	19.6435	19.4521	20.2544	22.0987	NaN	NaN	NaN	17.0488	18.6047	5	5	3	30.5	30.5	21.6	19.274	0	17.763	123890000	9
303	H7C3B7;A8MTX4;A8MYG7;Q9UPM9-2;Q9UPM9	H7C3B7;A8MTX4;A8MYG7;Q9UPM9-2;Q9UPM9	B9 domain-containing protein 1	B9D1	21.1028	17.1236	20.8439	17.3426	20.9065	22.258	NaN	NaN	NaN	NaN	NaN	2	2	2	20.3	20.3	20.3	14.93	0.0023645	2.9647	79970000	3
304	A8MTY9;O14972-2;O14972;A8MY26	A8MTY9;O14972-2;O14972;A8MY26	Down syndrome critical region protein 3	DSCR3	19.0408	19.2178	19.8576	18.4422	19.4977	20.8287	16.6936	18.2005	18.018	18.5278	17.5922	2	2	2	8	8	8	27.958	0.00022326	4.5619	98286000	7
305	A8MUA9;A8MU27;P61956-2;Q6EEV6;P61956;P55854;P55854-2	A8MUA9;A8MU27;P61956-2;Q6EEV6;P61956;P55854;P55854-2	Small ubiquitin-related modifier 2;Small ubiquitin-related modifier 4;Small ubiquitin-related modifier 3	SUMO3;SUMO2;SUMO4	NaN	21.216	22.8451	NaN	22.374	23.9852	NaN	NaN	NaN	NaN	NaN	1	1	1	8.9	8.9	8.9	15.317	0	10.021	348600000	8
306	F8WDS8;C9J0U9;D3YTH5;A8MUM1;Q53HC9;F8WDX0;F8WB12	F8WDS8;C9J0U9;D3YTH5;A8MUM1;Q53HC9;F8WDX0;F8WB12	Protein TSSC1	TSSC1	19.3044	20.6737	22.134	20.3109	21.1287	22.1569	20.6934	18.7769	20.3755	20.5509	20.9754	3	3	3	31.8	31.8	31.8	15.131	0	14.341	211340000	12
307	H7BY10;K7EJV9;K7ERT8;A8MUS3;P62750;K7EMA7	H7BY10;K7EJV9;K7ERT8;A8MUS3;P62750;K7EMA7	60S ribosomal protein L23a	RPL23A	25.4014	26.5862	25.7212	25.9261	26.3808	22.63	23.9952	24.3031	23.863	26.2444	24.1029	8	8	8	36.7	36.7	36.7	17.692	0	35.51	4676600000	67
308	A8MUX0	A8MUX0	Keratin-associated protein 16-1	KRTAP16-1	NaN	20.6351	NaN	26.1766	NaN	NaN	NaN	NaN	NaN	NaN	NaN	8	8	8	16.1	16.1	16.1	53.912	0	142.87	1084700000	13
309	P62308;A8MWD9;Q49AN9;F5H013;C9JVQ0	P62308;A8MWD9;Q49AN9;F5H013;C9JVQ0	Small nuclear ribonucleoprotein G;Putative small nuclear ribonucleoprotein G-like protein 15	SNRPG;SNRPGP15	25.2296	25.8734	26.3612	25.5975	26.4281	21.6167	25.0653	24.5343	25.0153	22.1372	23.8118	4	4	4	35.5	35.5	35.5	8.496	0	7.1093	1432500000	12
310	H7C2N5;A8MWY0-2;A8MWY0-3;A8MWY0;C9JA41	H7C2N5;A8MWY0-2;A8MWY0-3;A8MWY0;C9JA41	UPF0577 protein KIAA1324-like	KIAA1324L	NaN	NaN	NaN	NaN	17.8103	NaN	NaN	NaN	NaN	NaN	NaN	2	2	2	3.5	3.5	3.5	106.27	0.0027312	2.8533	12411000	3
311	A8MXP8;Q14257;Q14257-2;H0YL43	A8MXP8;Q14257;Q14257-2	Reticulocalbin-2	RCN2	22.1399	21.4846	21.5216	22.3386	21.2063	20.9932	19.4807	19.8597	19.9173	20.8838	21.2729	4	4	4	28.7	28.7	28.7	24.796	0	14.792	242660000	8
312	A8MXP9;P43243;D6REM6;D6R991;H0Y8T4;B3KM87;P43243-2;D6RBK5;Q68E03;D6RBI2;D6RE02;D6RIA2;D6RAM9;D6RAY2;D6R8Z5	A8MXP9;P43243;D6REM6;D6R991;H0Y8T4	Matrin-3	MATR3	24.5598	25.8414	25.7216	24.9327	25.9249	22.9186	23.2494	24.7787	22.8201	23.9576	24.0254	32	32	32	42.1	42.1	42.1	99.966	0	323.31	16574000000	339
313	A8MZH8;A8MXQ1;P53801	A8MZH8;A8MXQ1;P53801	Pituitary tumor-transforming gene 1 protein-interacting protein	PTTG1IP	21.9473	20.7843	NaN	21.3471	21.7952	20.9298	21.6889	NaN	21.6793	21.6929	NaN	1	1	1	16.8	16.8	16.8	11.598	0	15.582	214210000	7
314	A8MXV4	A8MXV4	Nucleoside diphosphate-linked moiety X motif 19, mitochondrial	NUDT19	21.2546	19.2364	20.3356	18.4763	21.3014	19.2607	20.7266	21.1408	20.9861	19.8624	20.928	8	8	8	25.9	25.9	25.9	42.233	0	14.174	369450000	24
315	A8MXZ4;Q9NQ84;Q9NQ84-2	A8MXZ4;Q9NQ84;Q9NQ84-2	G-protein coupled receptor family C group 5 member C	GPRC5C	19.4539	NaN	NaN	NaN	NaN	NaN	NaN	19.3189	19.4245	19.2073	NaN	1	1	1	3.2	3.2	3.2	50.111	0	5.9396	40216000	5
316	C9JBG0;A8MYQ9;E7ES60;Q9BZG1-4;Q9BZG1;V9GY61;K7EJW7;K7EIF2;H7C0Y7;C9JY26;Q9BZG1-2	C9JBG0;A8MYQ9;E7ES60;Q9BZG1-4;Q9BZG1;V9GY61;K7EJW7;K7EIF2;H7C0Y7;C9JY26;Q9BZG1-2	Ras-related protein Rab-34	RAB34	17.4824	17.8039	NaN	18.8384	18.1632	18.0107	17.6646	18.1435	18.0532	NaN	NaN	2	2	2	10.9	10.9	10.9	23.896	0.0027306	2.8509	37531000	4
317	A8MZ84;D3YTC8;Q6GTX8-3;Q6GTX8-2;Q6GTX8	A8MZ84;D3YTC8;Q6GTX8-3;Q6GTX8-2;Q6GTX8	Leukocyte-associated immunoglobulin-like receptor 1	LAIR1	19.8883	NaN	NaN	NaN	18.2457	19.3295	19.5003	NaN	NaN	NaN	17.9129	1	1	1	7.1	7.1	7.1	29.69	0	18.849	69780000	2
318	J3QL64;A8MZH3;H7BYR8;P02686-6;P02686-5;P02686-4;P02686-3;P02686;E9PMR5;H0YF02;H0YEA2;J3QKL5;J3QQK6;E9PNZ1;E9PKX9;E9PJ72;J3KT34;F5H7N4;F8WEU6;C9J6H1;P02686-2;E9PLU9;E9PLQ9;E9PQE7;E9PSE2;J3KS94;J3KT01	J3QL64;A8MZH3;H7BYR8;P02686-6;P02686-5;P02686-4;P02686-3;P02686;E9PMR5;H0YF02;H0YEA2;J3QKL5;J3QQK6;E9PNZ1;E9PKX9;E9PJ72;J3KT34;F5H7N4;F8WEU6;C9J6H1;P02686-2	Myelin basic protein	MBP	23.0286	18.6878	18.1581	NaN	NaN	23.5465	NaN	19.6091	NaN	NaN	18.3722	6	6	6	38.2	38.2	38.2	17.119	0	10.832	301690000	8
319	E9PCT1;A9Z1X7;Q8IYB3-2;Q8IYB3;M0R088;M0R1E7;M0QXG5	E9PCT1;A9Z1X7;Q8IYB3-2;Q8IYB3;M0R088;M0R1E7	Serine/arginine repetitive matrix protein 1	SRRM1	17.5348	21.1501	20.8648	19.3842	21.1232	17.1056	17.6426	19.418	18.1228	17.3848	17.726	4	4	4	5.7	5.7	5.7	93.435	0	15.108	463130000	15
320	B0I1T2;B0I1T2-4;B0I1T2-3;F8WEW9;B0I1T2-2	B0I1T2;B0I1T2-4	Unconventional myosin-Ig;Minor histocompatibility antigen HA-2	MYO1G	20.6971	16.4406	17.5312	16.2942	14.2848	18.1712	20.7001	18.4188	19.598	19.3367	20.4463	21	21	21	25	25	25	116.44	0	83.095	1085600000	40
321	B0QY16;Q6ICG6-3;Q6ICG6;Q6ICG6-2	B0QY16;Q6ICG6-3;Q6ICG6;Q6ICG6-2	Uncharacterized protein KIAA0930	KIAA0930	NaN	19.5342	NaN	19.065	NaN	17.4935	16.9939	NaN	16.503	17.3558	NaN	2	2	2	7.3	7.3	7.3	32.451	0.0076251	2.3352	32017000	4
322	B0QY89;Q9Y262;Q9Y262-2;B0QY90;C9JHP4;C9K0Q7;H7C3A0;H0Y7E6	B0QY89;Q9Y262;Q9Y262-2;B0QY90	Eukaryotic translation initiation factor 3 subunit L	EIF3L	22.318	23.35	23.5323	22.5311	23.9893	20.9508	23.1462	22.9136	22.669	23.3464	22.1492	21	21	21	40	40	40	70.901	0	156.64	3249300000	106
323	B0QYK0;Q01844-6;Q01844-3;Q01844;Q01844-5;C9JGE3;Q01844-2;H7BY36;F8WC90;Q01844-4	B0QYK0;Q01844-6;Q01844-3;Q01844;Q01844-5;C9JGE3;Q01844-2;H7BY36	RNA-binding protein EWS	EWSR1	21.6659	23.127	23.0823	22.5373	23.6246	20.3007	21.3919	22.2647	20.2061	20.925	20.8855	6	6	6	15.2	15.2	15.2	64.929	0	88.758	1283300000	50
324	H3BPC4;H3BQQ9;B0QYN7;P63279	H3BPC4;H3BQQ9;B0QYN7;P63279	SUMO-conjugating enzyme UBC9	UBE2I	NaN	24.987	24.5443	24.1432	23.5685	20.3447	NaN	NaN	NaN	NaN	20.6912	3	3	3	57.1	57.1	57.1	7.8891	0	7.8106	366850000	10
325	F2Z2V0;B0QZ18;Q99829;A6PVH9;E7ENH5;Q5JX58;Q5JX59;Q5JX60;Q5JX44;Q5JX45;Q5JX61;Q5JX52;Q5JX56;Q5JX54;Q5JX55;H0Y524;Q5JX53;Q5JX57;E7EV27	F2Z2V0;B0QZ18;Q99829;A6PVH9;E7ENH5;Q5JX58;Q5JX59;Q5JX60;Q5JX44;Q5JX45	Copine-1	CPNE1	21.6077	22.3357	22.8685	21.8385	22.7453	21.9594	21.6275	20.814	20.1769	22.3186	22.3223	9	9	9	18.9	18.9	18.9	58.634	0	26.748	1083500000	67
326	B0YIW2;P02656	B0YIW2;P02656	Apolipoprotein C-III	APOC3	23.2926	23.4977	23.4997	23.0627	23.4273	23.4913	23.6031	21.7262	21.4477	NaN	23.7826	2	2	2	23.1	23.1	23.1	12.815	0	36.271	982830000	33
327	B0YIW6;P48444;P48444-2;Q6P1Q5;E9PK34	B0YIW6;P48444;P48444-2	Coatomer subunit delta	ARCN1	22.1292	22.5525	23.6173	22.7703	23.1919	19.8285	23.2272	22.3208	22.9096	22.8155	22.7032	17	17	17	32.2	32.2	32.2	61.626	0	65.103	2687600000	103
328	B1AH87;P30536	B1AH87;P30536	Translocator protein	TSPO	27.3213	25.8099	25.2675	27.4253	23.0908	25.9481	26.9909	27.0464	27.6232	27.3516	27.0655	4	4	4	43	43	43	11.896	0	46.46	8286900000	81
329	B1AHA8;P09601	B1AHA8;P09601	Heme oxygenase 1	HMOX1	21.0189	21.4934	NaN	NaN	NaN	22.6997	21.2145	19.2204	19.0571	20.7419	19.6047	5	5	5	44.9	44.9	44.9	21.583	0	10.063	225980000	11
330	B1AHD1;P55769	B1AHD1;P55769	NHP2-like protein 1;NHP2-like protein 1, N-terminally processed	NHP2L1	24.0657	25.9559	25.4685	25.5142	25.7133	23.638	24.8002	25.0004	23.8083	24.1593	23.9099	6	6	6	44.7	44.7	44.7	14.627	0	107.87	3798200000	64
331	B1AHR1;Q9UH03-2;Q9UH03;B1AHR2	B1AHR1;Q9UH03-2;Q9UH03	Neuronal-specific septin-3	2003-09-01	22.9204	NaN	21.2877	NaN	20.9663	23.0992	NaN	NaN	NaN	NaN	NaN	5	5	5	19	19	19	33.601	0	30.518	455050000	15
332	C9J0C0;C9JBA0;B1AJU2;E2QRE5;Q9Y228-3;Q9Y228-2;Q9Y228	C9J0C0;C9JBA0;B1AJU2;E2QRE5;Q9Y228-3;Q9Y228-2;Q9Y228	TRAF3-interacting JNK-activating modulator	TRAF3IP3	23.7468	NaN	20.0493	NaN	NaN	21.8423	22.609	NaN	NaN	NaN	NaN	2	2	2	23.5	23.5	23.5	11.636	0	12.035	259900000	2
333	B1AJY5;B1AJY7;O75832;B1AJY6;O75832-2	B1AJY5;B1AJY7;O75832	26S proteasome non-ATPase regulatory subunit 10	PSMD10	NaN	20.1954	21.2035	19.3625	21.0531	18.3218	NaN	NaN	19.4066	19.9323	NaN	3	3	3	25.4	25.4	25.4	20.217	0.0051282	2.5693	113120000	3
334	B1AK53	B1AK53	Espin	ESPN	NaN	NaN	NaN	NaN	NaN	NaN	NaN	17.5655	16.9998	NaN	16.9416	1	1	1	1.5	1.5	1.5	91.732	0.003487	2.7748	14429000	2
335	B1AKM8;B1AKM6;H0Y7P7;Q9UG56-2;Q9UG56	B1AKM8;B1AKM6;H0Y7P7;Q9UG56-2;Q9UG56	Phosphatidylserine decarboxylase proenzyme;Phosphatidylserine decarboxylase alpha chain;Phosphatidylserine decarboxylase beta chain	PISD	21.3789	18.0086	20.4401	18.7124	20.8142	18.3898	21.0158	21.1924	NaN	19.508	20.5496	4	4	4	18.9	18.9	18.9	26.282	0	6.9231	221240000	7
336	F8WCR2;B1AKV4;B1AKV2;F6UTR7;B1AKV6;B1AKV3;Q9NVA1-4;Q9NVA1-2;Q9NVA1	F8WCR2;B1AKV4;B1AKV2;F6UTR7;B1AKV6;B1AKV3;Q9NVA1-4;Q9NVA1-2;Q9NVA1	Ubiquinol-cytochrome-c reductase complex assembly factor 1	UQCC1	20.7274	NaN	20.2941	19.1461	20.6019	NaN	20.7363	20.2617	20.7536	20.3806	20.7921	1	1	1	9.7	9.7	9.7	13.821	0.00082833	3.5397	127280000	5
337	B1AKY9;P50993;H0Y7C1	B1AKY9;P50993;H0Y7C1	Sodium/potassium-transporting ATPase subunit alpha-2	ATP1A2	26.1366	20.2405	21.2542	19.8761	22.8288	25.9326	14.1034	18.3107	22.0169	18.097	NaN	41	26	24	43.7	26.9	24.1	110.86	0	270.8	9261500000	119
338	H0Y6Y8;B1AL05;Q8N983-4;Q8N983-3;Q8N983-2;Q8N983;Q8N983-6;Q8N983-7;H0YBU8;M0R051	H0Y6Y8;B1AL05;Q8N983-4;Q8N983-3;Q8N983-2;Q8N983;Q8N983-6;Q8N983-7;H0YBU8	39S ribosomal protein L43, mitochondrial	MRPL43	22.2084	18.3457	21.4871	NaN	21.6301	19.3974	20.5641	20.4073	21.5012	20.9296	21.8476	3	3	3	20.1	20.1	20.1	18.657	0	6.1844	319250000	15
339	B1AMB1;B1AMB2;Q9BPZ7-5;Q9BPZ7-6;Q9BPZ7-3;Q9BPZ7-2;Q9BPZ7	B1AMB1;B1AMB2;Q9BPZ7-5;Q9BPZ7-6;Q9BPZ7-3;Q9BPZ7-2;Q9BPZ7	Target of rapamycin complex 2 subunit MAPKAP1	MAPKAP1	NaN	NaN	18.9626	NaN	19.6286	19.9349	NaN	NaN	NaN	NaN	NaN	1	1	1	15.1	15.1	15.1	10.36	0.00041938	3.7094	6971400	1
340	B1AMS2;Q14141-2;Q14141-4;Q14141;Q14141-3	B1AMS2;Q14141-2;Q14141-4;Q14141	Septin-6	2006-09-01	21.3626	NaN	21.3851	17.3853	21.4465	19.2587	20.171	NaN	19.4907	18.9014	19.3334	10	3	3	31.3	15.8	15.8	49.303	0	182.71	373520000	12
341	R4GNH9;R4GMQ7;B1AMU7;B1AMU3;B1AMU4;Q9Y3B2	R4GNH9;R4GMQ7;B1AMU7;B1AMU3;B1AMU4;Q9Y3B2	Exosome complex component CSL4	EXOSC1	NaN	NaN	NaN	NaN	NaN	NaN	NaN	NaN	NaN	NaN	NaN	1	1	1	11.5	11.5	11.5	15.105	0.0049599	2.6114	0	1
342	B1AMW1;P19256-2;P19256-3;P19256;H0YDI1	B1AMW1;P19256-2;P19256-3;P19256	Lymphocyte function-associated antigen 3	CD58	23.6394	20.1921	20.9106	21.3914	20.7449	22.4025	23.6446	23.4897	23.4625	23.4525	22.9568	3	3	3	13.8	13.8	13.8	27.018	0	8.1839	697760000	8
343	B1AN48;Q9UBC9	B1AN48;Q9UBC9	Small proline-rich protein 3	SPRR3	23.2811	NaN	NaN	22.0845	NaN	18.6054	21.9557	22.6981	21.5362	22.3177	21.9721	4	4	4	25.2	25.2	25.2	17.058	0	15.948	689300000	10
344	B1ANH5;B1ANH0;B1ANG9;Q16774;Q16774-2;B1ANH2;Q16774-3;B1ANH6;B1ANH3	B1ANH5;B1ANH0;B1ANG9;Q16774;Q16774-2;B1ANH2;Q16774-3	Guanylate kinase	GUK1	NaN	NaN	20.9142	20.2247	20.5907	21.071	NaN	19.4212	18.8953	NaN	NaN	3	3	3	21.6	21.6	21.6	21.999	0.00022007	4.3737	89901000	4
345	B1ANR0;Q13310-2;Q13310;Q13310-3;H0Y5F5;B1ANR1;H0YEQ8;H0YEU6;H0YCC8;H0YER0;H0Y6X6	B1ANR0;Q13310-2;Q13310;Q13310-3;H0Y5F5	Polyadenylate-binding protein;Polyadenylate-binding protein 4	PABPC4	21.0215	21.4488	21.4696	20.6632	21.5586	18.3647	20.3673	20.2641	19.693	21.1481	21.0732	14	6	5	27.8	10.1	8.6	67.97	0	11.936	914870000	24
346	B1AP13;P08174-2;H3BLV0;H7BY55;P08174-4;P08174;P08174-3;P08174-5;P08174-6;P08174-7;B1AP15	B1AP13;P08174-2;H3BLV0;H7BY55;P08174-4;P08174;P08174-3;P08174-5;P08174-6;P08174-7	Complement decay-accelerating factor	CD55	23.1023	20.6657	23.7764	21.8688	21.6006	19.9758	22.5315	24.3342	23.8893	20.823	21.254	13	13	13	35.6	35.6	35.6	49.338	0	61.711	2392500000	68
347	B1AP63;Q6GPG7;Q92633;Q92633-2	B1AP63;Q6GPG7;Q92633;Q92633-2	Lysophosphatidic acid receptor 1	LPAR1	22.884	NaN	NaN	NaN	NaN	23.3153	NaN	NaN	NaN	NaN	20.3185	2	2	2	9.3	9.3	9.3	20.564	0	7.0208	190660000	2
348	B1AUU8;P42566;S4R3U1	B1AUU8;P42566	Epidermal growth factor receptor substrate 15	EPS15	NaN	15.6732	16.9405	NaN	18.2606	NaN	17.8763	16.6119	NaN	17.087	18.7191	4	4	4	6.8	6.8	6.8	83.653	0	6.2995	75162000	13
349	C9JIZ6;B1AVU8;P07602;P07602-2;P07602-3;Q5BJH1	C9JIZ6;B1AVU8;P07602;P07602-2;P07602-3;Q5BJH1	Prosaposin;Saposin-A;Saposin-B-Val;Saposin-B;Saposin-C;Saposin-D	PSAP	24.8245	24.8787	26.0961	24.9095	26.6323	24.7181	25.0518	24.1441	24.7418	24.5823	23.9601	19	19	19	41	41	41	58.44	0	177.5	18593000000	176
350	E3W994;E7ERI8;E7EW49;B2RTR1;J3KR49;O75122;H7C4I5;B3KR06;E7ENG2;O75122-2	E3W994;E7ERI8;E7EW49;B2RTR1;J3KR49;O75122	CLIP-associating protein 2	CLASP2	17.4407	18.1335	18.8278	15.1662	16.7197	18.6639	NaN	NaN	NaN	13.9296	NaN	6	6	4	6.7	6.7	4.2	138.86	0	20.291	135050000	7
351	B3KRF7;E9PC66;P17029	B3KRF7;E9PC66;P17029	Zinc finger protein with KRAB and SCAN domains 1	ZKSCAN1	NaN	NaN	16.4467	17.6942	NaN	NaN	NaN	NaN	NaN	NaN	NaN	1	1	1	4.6	4.6	4.6	39.323	0.0045872	2.6321	7535000	1
352	B3KT61;Q86SE5;Q86SE5-3	B3KT61;Q86SE5;Q86SE5-3	RNA-binding Raly-like protein	RALYL	NaN	NaN	18.5613	NaN	19.1921	NaN	NaN	NaN	NaN	NaN	NaN	2	1	1	8.2	5.7	5.7	31.074	0	5.0732	18729000	2
353	F8W7U8;P49959-2;P49959;B3KTC7;F5GXT0;F5H742;F5H256	F8W7U8;P49959-2;P49959;B3KTC7	Double-strand break repair protein MRE11A	MRE11A	18.7604	21.9269	21.7335	21.2158	21.6539	19.8278	19.2967	18.9954	18.984	20.2337	20.5584	11	11	11	19.8	19.8	19.8	80.521	0	24.385	782000000	29
354	B3KUS5;Q70CQ3	B3KUS5;Q70CQ3	Ubiquitin carboxyl-terminal hydrolase;Ubiquitin carboxyl-terminal hydrolase 30	USP30	NaN	NaN	17.7478	NaN	19.6167	NaN	NaN	NaN	NaN	NaN	NaN	2	2	2	5.1	5.1	5.1	55.108	0.00042373	3.835	24577000	2
355	B3KV06;Q9H239;C0H5X0;A0A087X1Y9;Q9H239-2	B3KV06;Q9H239	Matrix metalloproteinase-28	MMP28	17.2084	NaN	NaN	20.6309	NaN	NaN	19.664	18.5784	18.1119	19.9756	17.8571	5	5	5	12.4	12.4	12.4	57.618	0	13.077	147460000	11
356	F8VUX1;F8VY35;F8VV59;B7Z9C2;F8W0J6;F5H4R6;H0YIV4;B3KV44;P55209-2;P55209;H0YHC3;F8W020;F8W118;F8VXI6;F8W543;H0YH88;F8VRJ2;F8VVB5;B7Z4K9	F8VUX1;F8VY35;F8VV59;B7Z9C2;F8W0J6;F5H4R6;H0YIV4;B3KV44;P55209-2;P55209;H0YHC3;F8W020;F8W118;F8VXI6;F8W543;H0YH88;F8VRJ2	Nucleosome assembly protein 1-like 1	NAP1L1	24.4789	23.7368	23.5948	23.2604	23.8273	23.6921	23.6689	23.5742	21.8268	23.1609	23.6534	6	5	5	40.1	35.9	35.9	27.724	0	63.718	1872900000	87
357	C9J976;C9J0A2;B3KVD8;Q8TBG9;Q8TBG9-2	C9J976;C9J0A2;B3KVD8;Q8TBG9;Q8TBG9-2	Synaptoporin	SYNPR	20.8301	NaN	NaN	21.0425	NaN	NaN	NaN	NaN	NaN	NaN	NaN	1	1	1	7	7	7	22.298	0.0029228	2.8363	39653000	1
358	B3KVN2;P49354-2;P49354;E9PPM9;H0YCW1;E9PQP6	B3KVN2;P49354-2;P49354;E9PPM9;H0YCW1;E9PQP6	Protein farnesyltransferase/geranylgeranyltransferase type-1 subunit alpha	FNTA	19.5294	19.7023	18.7235	18.8113	18.7602	19.702	19.525	18.0316	18.5147	19.1091	18.0188	2	2	2	7.5	7.5	7.5	27.443	0.0004185	3.6925	95065000	4
359	B3KW70;F5GYX4;H0YG03;Q13361-2;Q13361;H0YGS3;F5H7Z2;F5H2W4;F5H413	B3KW70;F5GYX4;H0YG03;Q13361-2;Q13361;H0YGS3;F5H7Z2;F5H2W4	Microfibrillar-associated protein 5	MFAP5	23.8905	19.226	25.493	25.5979	25.3376	24.8437	23.5306	25.2721	24.79	22.3757	24.0044	4	4	4	23.6	23.6	23.6	17.114	0	8.8639	2944600000	33
360	B4DDD8;B3KWE1;P12081-4;P12081;E7ETE2;B4E1C5;P12081-3;P12081-2	B4DDD8;B3KWE1;P12081-4;P12081;E7ETE2;B4E1C5;P12081-3;P12081-2	Histidine--tRNA ligase, cytoplasmic	HARS	20.405	20.3104	19.882	19.9841	19.7616	17.903	21.0915	17.0713	19.0841	20.34	18.2881	5	5	4	12.9	12.9	10.6	48.569	0	37.861	289270000	8
361	B3KY94;O14735-3;O14735;H3BUR9;O14735-2	B3KY94;O14735-3;O14735;H3BUR9	CDP-diacylglycerol--inositol 3-phosphatidyltransferase	CDIPT	19.8164	23.2102	22.7407	22.7173	22.9571	20.0804	23.0197	22.6386	22.4817	22.1605	22.3721	3	3	3	14.8	14.8	14.8	25.946	0	10.027	528430000	30
362	B4DDG0;B4E171;P41732	B4DDG0;B4E171;P41732	Tetraspanin;Tetraspanin-7	TSPAN7	18.9837	19.6885	22.152	NaN	23.543	NaN	NaN	NaN	NaN	NaN	NaN	2	2	2	9.4	9.4	9.4	29.351	0	137.17	164210000	3
363	B4DDJ5;P21757-2;P21757-3;P21757;H0YBY2;E5RI91;E5RFW8	B4DDJ5;P21757-2;P21757-3;P21757;H0YBY2	Macrophage scavenger receptor types I and II	MSR1	NaN	NaN	NaN	15.5857	NaN	19.2044	19.5679	NaN	18.5482	16.4596	19.2084	3	3	3	6.6	6.6	6.6	51.725	0	37.764	173600000	5
364	B4DE85;P48651-2;P48651	B4DE85;P48651-2;P48651	Phosphatidylserine synthase 1	PTDSS1	19.3811	20.6864	19.7818	19.6807	20.3595	18.329	21.6359	21.725	20.6765	21.1806	21.964	5	5	5	21.9	21.9	21.9	34.579	0	22.997	336160000	24
365	H3BQ48;Q2TA70;B4DFF3	H3BQ48;Q2TA70;B4DFF3	Battenin	CLN3	NaN	20.6658	NaN	19.0842	NaN	24.7902	NaN	NaN	NaN	NaN	NaN	1	1	1	6	6	6	20.73	0.00062189	3.5554	227110000	2
366	J3QKS7;B4DGM3;Q969G3-6;Q969G3-5;Q969G3-3;Q969G3-2;Q969G3-4;Q969G3;K7EMQ8;J3KT85;J3QR61;H7C048	J3QKS7;B4DGM3;Q969G3-6;Q969G3-5;Q969G3-3;Q969G3-2;Q969G3-4;Q969G3;K7EMQ8	SWI/SNF-related matrix-associated actin-dependent regulator of chromatin subfamily E member 1	SMARCE1	19.8228	21.005	20.9836	20.0438	20.5038	NaN	19.764	18.6118	19.3248	19.2034	19.6071	5	4	4	19.1	16.7	16.7	33.433	0	15.98	245680000	13
367	B4DHE8;Q96DH6-2;Q96DH6;B4DM51;Q96DH6-3;J3KTC1;J3QKT5	B4DHE8;Q96DH6-2;Q96DH6;B4DM51;Q96DH6-3;J3KTC1	RNA-binding protein Musashi homolog 2	MSI2	22.4874	24.215	23.6988	23.3049	24.0756	23.2466	18.7865	22.0584	19.8084	20.7482	20.8235	8	8	7	32.4	32.4	28.7	34.812	0	69.423	1066200000	31
368	B4DI03;K7EJQ7;Q9BY50	B4DI03;K7EJQ7;Q9BY50	Signal peptidase complex catalytic subunit SEC11;Signal peptidase complex catalytic subunit SEC11C	SEC11L3;SEC11C	23.85	19.5609	25.1369	21.4604	24.7265	22.5005	24.1998	20.0621	20.2899	20.8617	22.6116	6	6	6	37.8	37.8	37.8	17.404	0	29.154	1653100000	36
369	B4DI26;Q9Y6N1-2;Q9Y6N1	B4DI26;Q9Y6N1-2;Q9Y6N1	Cytochrome c oxidase assembly protein COX11, mitochondrial	COX11	NaN	NaN	NaN	18.6757	NaN	NaN	NaN	NaN	NaN	NaN	NaN	1	1	1	8.7	8.7	8.7	25.977	0.0014202	3.3077	22864000	1
370	Q08495-3;B4DI75;Q08495-2;Q08495;E5RGQ7;E5RJC0;E5RGQ0;E5RFK4	Q08495-3;B4DI75;Q08495-2;Q08495	Dematin	DMTN	19.368	18.1438	16.9992	17.2525	18.8334	NaN	NaN	NaN	NaN	NaN	17.2055	3	3	3	8.9	8.9	8.9	40.68	0.0014179	3.2922	39973000	2
371	C9JM82;B4DJ62;G3XAH0;Q99719;F8W9E5;E7EQM7;E7EPG2;E7EX32;Q99719-2;A0A087WWZ5	C9JM82;B4DJ62;G3XAH0;Q99719;F8W9E5;E7EQM7;E7EPG2;E7EX32;Q99719-2	Septin-5	2005-09-01	21.6469	19.3136	20.4516	18.4689	20.7326	21.5926	NaN	NaN	17.9376	17.9387	15.9853	5	5	5	20.9	20.9	20.9	34.672	0	9.4101	288660000	12
372	B4DJV2;O75390;H0YIC4;F8VRI6;F8VPA1;F8VPF9;F8VR34;F8W1S4;H0YH82;F8VRP1;F8VX68;F8VTT8;F8W4S1;F8W642;F8VZK9;F8VX07;F8VWQ5;F8W0J2;F8VU34	B4DJV2;O75390	Citrate synthase;Citrate synthase, mitochondrial	CS	27.6853	26.3967	26.3329	26.4716	26.5835	26.0626	28.0774	27.3155	27.9493	27.3753	27.6408	17	17	16	45.7	45.7	43.7	50.431	0	224.64	34618000000	393
373	B4DKB2;P42892-3;P42892-2;P42892-4;P42892	B4DKB2;P42892-3;P42892-2;P42892-4;P42892	Endothelin-converting enzyme 1	ECE1	20.8534	18.6671	20.0571	18.2422	19.7467	20.9265	19.1573	20.2375	18.9513	16.1828	19.2727	6	6	6	11.9	11.9	11.9	83.573	0	23.131	499530000	27
374	B4DKY1;P49589-2;P49589;P49589-3;C9JLN0;E9PRS8;E9PLP0	B4DKY1;P49589-2;P49589;P49589-3	Cysteine--tRNA ligase, cytoplasmic	CARS	20.6533	19.7984	21.6557	19.984	21.2479	20.7173	20.9796	17.7398	19.3603	20.024	16.5273	13	13	13	20.4	20.4	20.4	84.277	0	36.511	664700000	28
375	B4DLN1;P52815;I3L1E8;F6QW41	B4DLN1			23.4449	23.3035	22.5632	23.277	22.6283	21.1628	24.0545	23.481	23.7407	23.4991	23.819	14	14	5	39.6	39.6	14.3	48.099	0	50.156	3055500000	57
376	B4DLR8;P15559-3;P15559-2;P15559;H3BRK3;H3BNV2	B4DLR8;P15559-3;P15559-2;P15559;H3BRK3;H3BNV2	NAD(P)H dehydrogenase [quinone] 1	NQO1	24.3561	NaN	18.7979	NaN	18.6895	24.7149	NaN	NaN	18.4611	20.0591	NaN	5	5	5	29.7	29.7	29.7	22.793	0	67.415	608390000	11
377	B4DPQ0;P00736;F5H2D0;F5H1V0;F5H6Y3;F5H3N3	B4DPQ0;P00736;F5H2D0	Complement C1r subcomponent;Complement C1r subcomponent heavy chain;Complement C1r subcomponent light chain	C1R	20.1918	19.9347	18.6426	20.6945	19.0369	20.5715	22.5139	16.0483	18.5577	20.5262	21.0995	14	14	14	24.3	24.3	24.3	81.889	0	51.137	878630000	51
378	E9PRD9;E9PLK5;E9PQ75;E9PL76;B4DQB2;J3KQQ7;J3KQ55;J3QT03;O95498-5;O95498-3;O95498-4;O95498-2;O95498-6;O95498;E9PK31	E9PRD9;E9PLK5;E9PQ75;E9PL76;B4DQB2;J3KQQ7;J3KQ55;J3QT03;O95498-5;O95498-3;O95498-4;O95498-2;O95498-6;O95498;E9PK31	Vascular non-inflammatory molecule 2	VNN2	20.2007	NaN	NaN	NaN	NaN	NaN	21.9542	19.336	19.6071	18.8135	19.4584	2	2	2	37.3	37.3	37.3	11.498	0.00042301	3.8252	68277000	3
379	B4DQI6;Q13595-3;Q13595;Q13595-2	B4DQI6;Q13595-3;Q13595;Q13595-2	Transformer-2 protein homolog alpha	TRA2A	21.6766	22.7276	23.4022	21.2821	23.4152	NaN	21.2592	22.3638	21.1183	22.4978	21.4503	5	4	4	30.6	25.6	25.6	20.589	0	13.263	540910000	21
380	B4DR61;P61619;F8W776;Q8TC24;Q9H9S3-2;Q9H9S3-3;Q9H9S3;A6NK38;F2Z2C7;A6NIF9;C9JJV4;P61619-3;H7C1Q9;H7C069;H7C1S8	B4DR61;P61619;F8W776;Q8TC24;Q9H9S3-2;Q9H9S3-3;Q9H9S3	Protein transport protein Sec61 subunit alpha isoform 1;Protein transport protein Sec61 subunit alpha isoform 2	SEC61A1;SEC61A2	25.3635	25.1337	24.5311	25.3037	25.1156	23.7232	25.6371	25.5565	25.268	25.045	25.3984	10	10	7	16	16	12.2	52.949	0	104.12	9095200000	81
381	B4DRK2;E9PHB5;E7EPC8;Q9UQB3;Q9UQB3-2;D6R9A8	B4DRK2;E9PHB5;E7EPC8;Q9UQB3;Q9UQB3-2	Catenin delta-2	CTNND2	20.7427	NaN	NaN	NaN	17.7675	22.0801	NaN	NaN	NaN	NaN	NaN	8	6	6	9.9	8	8	97.979	0	18.357	393310000	12
382	B4DRN8;Q5W0Z9-2;Q5W0Z9-4;Q5W0Z9-3;Q5W0Z9	B4DRN8;Q5W0Z9-2;Q5W0Z9-4;Q5W0Z9-3;Q5W0Z9	Palmitoyltransferase;Probable palmitoyltransferase ZDHHC20	ZDHHC20	NaN	NaN	20.2512	19.1127	20.7862	18.8055	20.1241	19.4109	19.1613	19.4399	19.1162	2	2	2	13	13	13	33.743	0.00022036	4.3952	150630000	1
383	H3BLV9;Q5R363;B4DS61;Q96SB4;Q96SB4-3;H7C521;H7C5L6;A8MPP7;A8MPY5;E7ETV6;Q9UPE1-2;Q9UPE1-3;Q9UPE1-4;Q9UPE1;H7C2I2	H3BLV9;Q5R363;B4DS61;Q96SB4;Q96SB4-3	SRSF protein kinase 1	SRPK1	19.4504	19.2296	17.2365	18.5712	18.8749	18.7498	18.9138	19.6764	18.4737	18.9493	18.6243	6	6	4	11.6	11.6	8.5	76.039	0	11.574	181420000	11
384	B4DSN5;P18031	B4DSN5;P18031	Tyrosine-protein phosphatase non-receptor type;Tyrosine-protein phosphatase non-receptor type 1	PTPN1	21.9776	20.7148	19.439	20.5513	19.6966	17.2367	21.5119	21.3425	19.8486	21.0005	21.2754	6	6	6	23.8	23.8	23.8	41.26	0	47.192	607370000	26
385	B4DTF2;P13928-2;A0A096LPL1	B4DTF2	Annexin	ANXA8L1	NaN	16.9971	NaN	20.4507	NaN	NaN	NaN	NaN	NaN	17.8346	18.5977	10	1	0	50.4	9.3	0	30.492	0	6.7619	46315000	4
386	E9PGC0;P20936-2;B4DTL2;P20936	E9PGC0;P20936-2;B4DTL2;P20936	Ras GTPase-activating protein 1	RASA1	NaN	NaN	NaN	NaN	17.0717	NaN	15.78	17.0974	NaN	17.6977	17.1204	3	3	3	4.5	4.5	4.5	101.79	0.0027365	2.881	54594000	3
387	J3QSB7;B4DUC8;Q13126-7;Q13126-4;Q13126;Q13126-6;Q13126-5;Q13126-3;Q13126-2;F2Z2F3;F8WES2;J3KRN1	J3QSB7;B4DUC8;Q13126-7;Q13126-4;Q13126;Q13126-6;Q13126-5;Q13126-3;Q13126-2	Purine nucleoside phosphorylase;S-methyl-5-thioadenosine phosphorylase	MTAP	17.741	20.219	19.7017	19.9565	18.8522	20.0575	NaN	18.7652	19.1444	18.22	NaN	5	5	5	31.4	31.4	31.4	26.777	0	31.776	105470000	9
388	C9JAP5;C9JEN3;C9IYT2;F8WDY4;C9IZ27;C9JW19;C9JWV9;B4DUD2;Q969X1;C9JM62;C9JAK9;C9JN47;C9JI44;C9JDV0	C9JAP5;C9JEN3;C9IYT2;F8WDY4;C9IZ27;C9JW19;C9JWV9;B4DUD2;Q969X1;C9JM62;C9JAK9;C9JN47;C9JI44;C9JDV0	Protein lifeguard 3	TMBIM1	24.1694	NaN	23.1196	23.7997	21.8046	23.0532	23.1326	23.4411	23.1315	23.6763	22.9585	2	2	2	28.3	28.3	28.3	9.7926	0	10.632	235130000	14
389	B4DUX5;P50579;F8VRR3;F8VQZ7;P50579-2;G3V1U3;F8VSC4	B4DUX5;P50579;F8VRR3;F8VQZ7;P50579-2	Methionine aminopeptidase 2	METAP2	19.0324	20.6921	20.9321	21.0373	20.5334	20.8516	19.0664	19.1714	NaN	20.3296	17.8683	5	5	5	16.5	16.5	16.5	50.496	0	10.33	399400000	9
390	R4GNC0;B4DVL2;Q02083-2;Q02083;H0Y988;D6R9S9;Q02083-3	R4GNC0;B4DVL2;Q02083-2;Q02083;H0Y988;D6R9S9;Q02083-3	N-acylethanolamine-hydrolyzing acid amidase;N-acylethanolamine-hydrolyzing acid amidase subunit alpha;N-acylethanolamine-hydrolyzing acid amidase subunit beta	NAAA	NaN	16.8792	17.6178	NaN	18.9206	18.8046	18.6056	17.6859	NaN	17.9833	18.3919	2	2	2	12.6	12.6	12.6	24.725	0.0012308	3.437	34840000	2
391	B4DWR3;P61758	B4DWR3;P61758	Prefoldin subunit 3	VBP1	20.7078	21.3087	21.8195	19.8379	21.5769	19.2557	19.5586	17.5087	20.16	20.18	18.5397	5	5	5	26	26	26	22.254	0	7.1848	254660000	11
392	B4DXW4;Q9H078-3;Q9H078-2;H0YGM0;Q9H078-4;Q9H078;Q7Z777;F5H7A5;H0YFF5;F5GX99;F5H392	B4DXW4;Q9H078-3;Q9H078-2;H0YGM0;Q9H078-4;Q9H078;Q7Z777	Caseinolytic peptidase B protein homolog	CLPB	17.9242	15.1622	20.32	17.5104	20.8927	17.9091	19.3448	NaN	19.9095	17.6285	NaN	7	6	6	15.6	14.4	14.4	57.663	0	8.8419	171100000	5
393	B4DXZ6;P51114-2;P51114;E7EU85;E9PFF5;P51114-3;C9JZE0;C9JY20;C9JAJ4	B4DXZ6;P51114-2;P51114;E7EU85;E9PFF5;P51114-3	Fragile X mental retardation syndrome-related protein 1	FXR1	18.9458	20.4761	20.6738	19.5346	20.8125	18.8233	19.1405	19.7809	18.566	19.0436	19.8148	5	4	4	10.4	9	9	68.326	0	16.319	379130000	21
394	G3V4W0;B4DY08;G3V4C1;P07910-2;G3V576;G3V2Q1;P07910;P07910-4;G3V2D6;P07910-3;G3V5V7;G3V555;G3V575;G3V5X6;G3V3K6;G3V251;P0DMR1;O60812;B7ZW38;B2RXH8;B4DSU6;G3V4M8;G3V2H6;E5RJ39;Q86SE5-2	G3V4W0;B4DY08;G3V4C1;P07910-2;G3V576;G3V2Q1;P07910;P07910-4;G3V2D6;P07910-3;G3V5V7;G3V555;G3V575	Heterogeneous nuclear ribonucleoproteins C1/C2	HNRNPC	25.9789	27.3958	26.6581	26.178	26.9923	24.5037	24.5503	26.0218	24.1014	25.7667	24.8069	12	12	11	41.6	41.6	39.3	28.916	0	80.671	16081000000	353
395	B4DZ84;D3DX48;Q14168-6;Q14168-2;Q14168-3;Q14168;Q14168-4;Q14168-5;A0A087WVY2;E5RI47;A0A087X0C7;E5RK50;E5RJK0;E5RK44;E5RI32;E5RIU3	B4DZ84;D3DX48;Q14168-6;Q14168-2;Q14168-3;Q14168;Q14168-4;Q14168-5	MAGUK p55 subfamily member 2	MPP2	20.2673	NaN	22.8401	20.7678	23.3713	21.5575	NaN	NaN	NaN	NaN	21.0591	10	10	10	23.3	23.3	23.3	60.516	0	16.435	968820000	17
396	B4E0K5;Q16539-3;Q16539;Q16539-5;Q16539-4;E7EX54;B5TY33;H7C4E2	B4E0K5;Q16539-3;Q16539;Q16539-5;Q16539-4;E7EX54	Mitogen-activated protein kinase 14	MAPK14	18.2454	19.6975	17.3409	22.6034	NaN	22.0813	21.0831	19.4661	20.2484	17.9772	20.3104	5	5	1	21.2	21.2	3.9	32.357	0	13.513	286810000	11
397	B4E0T2;P50542-2;P50542-3;P50542;P50542-4;H0YGT8;F5GZ41;F5H0L9;F5GYB4;F5H3X7;F5H5C0;J3KPV0	B4E0T2;P50542-2;P50542-3;P50542;P50542-4	Peroxisomal targeting signal 1 receptor	PEX5	19.271	18.0746	20.1962	19.0352	19.5155	21.4933	17.3278	18.3099	17.4167	17.1611	18.7287	7	7	7	14.5	14.5	14.5	73.182	0	13.643	285220000	10
398	B4E1G1;Q9BUN8-2;Q9BUN8;E5RGY0	B4E1G1;Q9BUN8-2;Q9BUN8;E5RGY0	Derlin-1	DERL1	21.5645	17.892	23.1832	18.0863	19.5111	20.4317	22.783	22.5729	20.8781	22.4388	22.5333	4	4	4	22.5	22.5	22.5	17.033	0	7.4882	522480000	20
399	B4E1Z4;P00751;E7ETN3;H7C5H1;P00751-2;C9JRT3;E9PDZ0;H7C526	B4E1Z4;P00751;E7ETN3	Complement factor B;Complement factor B Ba fragment;Complement factor B Bb fragment	CFB	21.1356	21.6974	21.5061	19.7374	21.2806	19.5717	22.2085	16.2947	17.9574	22.3974	19.9205	17	17	15	15.5	15.5	13.8	140.94	0	96.51	1954200000	76
400	B4E3H6;H0YBT8;H0YAY0;E7EVI4;E7ET87;O75410-8;O75410-5;O75410-4;O75410-6;O75410-3;O75410-7;O75410;O75410-2	B4E3H6;H0YBT8;H0YAY0;E7EVI4;E7ET87;O75410-8;O75410-5;O75410-4;O75410-6;O75410-3;O75410-7;O75410;O75410-2	Transforming acidic coiled-coil-containing protein 1	TACC1	NaN	NaN	17.6311	NaN	NaN	NaN	NaN	NaN	NaN	NaN	NaN	1	1	1	4.5	4.5	4.5	27.573	0.0042324	2.6878	4262900	0
401	B5MBX2;P20062-2;P20062;C9J6W9	B5MBX2;P20062-2;P20062	Transcobalamin-2	TCN2	NaN	NaN	19.7292	NaN	19.6949	NaN	NaN	NaN	NaN	NaN	NaN	4	4	4	11.3	11.3	11.3	47.142	0	6.1255	41228000	8
402	B5MBZ0;Q9HC35-2;Q9HC35	B5MBZ0;Q9HC35-2;Q9HC35	Echinoderm microtubule-associated protein-like 4	EML4	18.788	20.3584	19.2846	19.6374	19.0202	NaN	19.2857	NaN	NaN	19.5381	15.942	4	4	4	6.7	6.7	6.7	110.18	0	8.228	381840000	6
403	B5MC53;B5MCF8;P39210;C9J473;H0Y6M5;E7EX18;G5E9F5;A8MPV4	B5MC53;B5MCF8;P39210;C9J473;H0Y6M5;E7EX18	Protein Mpv17	MPV17	23.4283	22.5194	22.7063	22.2316	22.6782	21.2479	22.9839	22.9217	23.0351	21.9363	23.3344	3	3	3	30	30	30	18.628	0	24.894	509950000	54
404	B5MC67;Q7Z6J6-2;Q7Z6J6;H7C282;F8WEJ8;F8WCI0;H0Y5N1;H0YNI9;H0YKW6	B5MC67;Q7Z6J6-2;Q7Z6J6;H7C282;F8WEJ8;F8WCI0;H0Y5N1	FERM domain-containing protein 5	FRMD5	NaN	NaN	NaN	NaN	NaN	19.0286	NaN	NaN	NaN	NaN	NaN	3	3	3	7.2	7.2	7.2	58.506	0.0002157	4.1146	19252000	3
405	B5MCA4;P16422;C9JKY3	B5MCA4;P16422;C9JKY3	Epithelial cell adhesion molecule	EPCAM	19.9985	21.8534	21.7551	23.2302	21.7952	NaN	19.5446	NaN	NaN	NaN	NaN	4	4	4	20.2	20.2	20.2	37.893	0	26.382	429770000	8
406	B5MCC5;B7Z264;B7Z2T4;E9PN83;Q15700-5;Q15700-3;Q15700;Q15700-4;Q15700-2;H7C325;E9PIW2;F8W750;Q5JUW8;Q92796-3;Q92796-2;Q92796;K7EQM6	B5MCC5;B7Z264;B7Z2T4;E9PN83;Q15700-5;Q15700-3;Q15700;Q15700-4;Q15700-2;H7C325;E9PIW2;F8W750	Disks large homolog 2	DLG2	NaN	18.3613	18.4466	NaN	17.4112	NaN	NaN	NaN	NaN	NaN	NaN	6	2	2	23.3	10.3	10.3	39.883	0	8.0282	19971000	2
407	B5MCE7;B5MCH7;E7ETZ4;Q9Y6E2;E9PFD4;Q75MG1	B5MCE7;B5MCH7;E7ETZ4;Q9Y6E2;E9PFD4	Basic leucine zipper and W2 domain-containing protein 2	BZW2	20.9473	21.5501	20.8307	21.2688	20.7978	23.025	21.2636	19.5074	20.7056	21.4961	20.8854	3	2	2	12	8.9	8.9	26.182	0	12.961	545400000	9
408	B5MCF9;O00541-2;O00541;B3KXD6;H7C267;Q674R7	B5MCF9;O00541-2;O00541;B3KXD6	Pescadillo homolog	PES1	20.2557	21.7855	22.5597	21.22	24.461	18.9215	21.3809	21.4709	21.4614	21.5631	20.8505	9	9	9	14.9	14.9	14.9	66.077	0	19.072	1938000000	29
409	B5MD46;Q9BXI6;Q9BXI6-2;H0Y2U5;H7C1Q1;H7C471;H0Y5R9;F8WCD1	B5MD46;Q9BXI6;Q9BXI6-2;H0Y2U5;H7C1Q1	TBC1 domain family member 10A	TBC1D10A	19.5761	18.1896	18.6474	17.7243	NaN	NaN	18.7946	20.241	19.7799	19.6249	19.026	3	3	3	9	9	9	47.913	0.00022242	4.5267	159990000	9
410	B5MDE0;Q96AA3;C9JP01	B5MDE0;Q96AA3;C9JP01	Protein RFT1 homolog	RFT1	21.4027	20.7817	19.3033	20.2654	19.6363	19.7931	20.6402	20.3708	20.58	20.9479	20.3436	4	4	4	7	7	7	55.835	0	5.6693	386510000	14
411	B5MDF5;P62826;J3KQE5;F5H018;B4DV51;H0YFC6;A0A087X0W0	B5MDF5;P62826;J3KQE5;F5H018;B4DV51	GTP-binding nuclear protein Ran	RAN	24.6472	26.1103	26.2592	26.3503	26.4345	24.8811	25.3903	24.4668	24.7629	25.186	22.8292	12	12	12	47.2	47.2	47.2	26.224	0	38.48	5951000000	125
412	Q99613;B5ME19;Q99613-2;H3BPE4;H3BPE3;H3BTY8	Q99613;B5ME19;Q99613-2	Eukaryotic translation initiation factor 3 subunit C;Eukaryotic translation initiation factor 3 subunit C-like protein	EIF3C;EIF3CL	24.0318	23.3431	23.4911	21.249	23.4633	21.3382	24.7576	25.2131	24.5899	23.7154	24.7002	22	22	22	29.8	29.8	29.8	105.34	0	55.059	10419000000	81
413	E7EW69;E7EX04;B5ME97;Q9P0V9-3;Q9P0V9;Q9P0V9-2;F5GYV2;F5H1F2	E7EW69;E7EX04;B5ME97;Q9P0V9-3;Q9P0V9;Q9P0V9-2	Septin-10	2010-09-01	20.8706	20.6955	20.5069	20.8859	20.6787	21.4096	20.9321	20.5448	20.5981	20.853	21.2772	7	5	5	17.8	12.2	12.2	52.145	0	40.684	607340000	33
414	B6VEX4;Q8IZP0-10;Q8IZP0-8;Q8IZP0-7;Q8IZP0-2;Q8IZP0-4;Q8IZP0-3;Q8IZP0-5;Q8IZP0-6;Q8IZP0-9;Q8IZP0;Q8IZP0-12;Q8IZP0-11	B6VEX4;Q8IZP0-10;Q8IZP0-8;Q8IZP0-7;Q8IZP0-2;Q8IZP0-4;Q8IZP0-3;Q8IZP0-5;Q8IZP0-6;Q8IZP0-9;Q8IZP0;Q8IZP0-12;Q8IZP0-11	Abl interactor 1	ABI1	23.7302	22.8743	21.8338	21.407	21.7397	22.8541	22.7384	22.842	22.6376	22.8088	22.1529	8	8	5	26.7	26.7	17.8	43.294	0	44.231	1628000000	57
415	H7C355;G3V195;B7WPE2;Q32P44	H7C355;G3V195;B7WPE2;Q32P44	Echinoderm microtubule-associated protein-like 3	EML3	NaN	20.2126	NaN	NaN	NaN	NaN	NaN	NaN	19.9566	19.8104	NaN	1	1	1	11.7	11.7	11.7	14.469	0	13.281	35358000	2
416	B7WPG3;C9IYN3;D6W592;Q8WVV9-5;Q8WVV9-4;Q8WVV9;H7C464;C9JJZ7;H7BXH8;Q8WVV9-3;Q8WVV9-2	B7WPG3;C9IYN3;D6W592;Q8WVV9-5;Q8WVV9-4;Q8WVV9	Heterogeneous nuclear ribonucleoprotein L-like	HNRNPLL;HNRPLL	20.2202	21.8247	20.778	20.9068	21.1376	17.2842	NaN	20.9213	19.0513	20.0234	18.6122	5	5	5	18.3	18.3	18.3	56.45	0	15.671	464150000	19
417	B7Z1P2;Q9H4M3-2;Q9H4M3;R4GNH4;R4GMZ8	B7Z1P2;Q9H4M3-2;Q9H4M3	F-box only protein 44	FBXO44	14.4467	15.2763	17.6851	14.8288	16.4739	20.8817	NaN	NaN	NaN	NaN	NaN	4	4	4	22.7	22.7	22.7	28.884	0	9.4317	46498000	6
418	B7Z1Q2;O60861-2;O60861-1;O60861-4;O60861	B7Z1Q2;O60861-2;O60861-1;O60861-4;O60861	Growth arrest-specific protein 7	GAS7	NaN	NaN	NaN	NaN	NaN	20.0208	NaN	NaN	NaN	NaN	NaN	2	2	2	10.3	10.3	10.3	34.206	0.0023562	2.9291	20212000	2
419	B7Z2B6;E9PFT7;P25054	B7Z2B6;E9PFT7;P25054	Adenomatous polyposis coli protein	APC	19.9756	19.0749	19.8582	21.3107	18.6018	20.0292	18.8658	NaN	NaN	NaN	NaN	2	2	2	2	2	2	126.17	0.00021501	4.0584	481460000	2
420	B7Z2R7;Q5T8D3-4;Q5T8D3-2;Q5T8D3-3;Q5T8D3	B7Z2R7;Q5T8D3-4;Q5T8D3-2;Q5T8D3-3;Q5T8D3	Acyl-CoA-binding domain-containing protein 5	ACBD5	19.69	NaN	18.208	18.3787	NaN	20.6565	17.8941	17.95	17.8175	17.8992	17.9595	2	2	2	4	4	4	58.792	0.00022267	4.5323	178060000	10
421	B7Z2Y2;Q14746-2;Q14746;V9GY21	B7Z2Y2;Q14746-2;Q14746	Conserved oligomeric Golgi complex subunit 2	COG2	15.071	17.8589	20.1915	18.0975	19.9304	15.6248	16.8061	16.9365	16.1241	17.7346	18.2641	5	5	5	11.3	11.3	11.3	76.078	0	16.696	188290000	5
422	H7C2W9;C9JU56;B7Z4E3;B7Z4C8;P62899-3;P62899;P62899-2;B8ZZK4	H7C2W9;C9JU56;B7Z4E3;B7Z4C8;P62899-3;P62899;P62899-2;B8ZZK4	60S ribosomal protein L31	RPL31	26.8274	28.053	27.606	27.5841	27.6594	25.4693	25.4824	27.4827	25.1651	27.3583	25.8959	5	5	5	42.6	42.6	42.6	12.701	0	11.337	9734300000	51
423	S4R3U6;F5GZ08;B7Z4G8;P51693;P51693-2;K7EMN4;K7EQJ4	S4R3U6;F5GZ08;B7Z4G8;P51693;P51693-2;K7EMN4;K7EQJ4	Amyloid-like protein 1;C30	APLP1	22.9476	20.4112	21.2229	20.4646	NaN	NaN	NaN	NaN	19.7355	NaN	NaN	2	2	2	6.9	6.9	6.9	32.295	0.0072761	2.3736	518850000	4
424	B7Z4W8;E9PD09;Q96HH9-5;Q96HH9-4;Q96HH9;Q96HH9-2;Q96HH9-3	B7Z4W8;E9PD09;Q96HH9-5;Q96HH9-4;Q96HH9;Q96HH9-2;Q96HH9-3	GRAM domain-containing protein 3	GRAMD3	19.1629	18.0103	16.7215	18.7403	17.9447	17.3253	NaN	18.3893	17.7412	18.1666	18.2621	1	1	1	5	5	5	36.041	0.0014107	3.2306	59831000	5
425	B7Z524;H0YDX7;J3QT46;Q9Y450-4;Q9Y450;H0YES5	B7Z524;H0YDX7;J3QT46;Q9Y450-4;Q9Y450;H0YES5	HBS1-like protein	HBS1L	18.446	NaN	19.2898	16.6925	18.927	19.7858	17.6281	NaN	16.8986	18.3813	17.6575	3	3	3	10.4	10.4	10.4	56.961	0	13.873	123620000	8
426	E7ES10;E7EVY3;B7Z574;E7ESM9;P20810-4;P20810-8;P20810;P20810-9;P20810-10;P20810-7;P20810-6;E9PCH5;P20810-2;P20810-5;E9PDE4;P20810-3;H0Y7F0;H0Y9H6;E7EQ12;E7EQA0;H0YD33;F8W7E0;H0YA91;D6RAA8;H0Y944;E9PSG1;D6RC54;E7EQK6	E7ES10;E7EVY3;B7Z574;E7ESM9;P20810-4;P20810-8;P20810;P20810-9;P20810-10;P20810-7;P20810-6;E9PCH5;P20810-2;P20810-5;E9PDE4;P20810-3;H0Y7F0;H0Y9H6;E7EQ12;E7EQA0;H0YD33	Calpastatin	CAST	23.6747	23.6384	17.7525	22.0072	19.3842	23.545	23.0564	22.4978	23.6063	23.5152	22.5071	14	14	14	37.4	37.4	37.4	69.749	0	68.316	2959300000	72
427	B7Z5P7;O60711;O60711-2	B7Z5P7;O60711;O60711-2	Leupaxin	LPXN	15.5177	NaN	NaN	NaN	NaN	15.8697	18.5725	NaN	15.6294	18.7079	18.2434	2	2	2	7.1	7.1	7.1	41.643	0.00022227	4.5143	39954000	10
428	C9J8P8;C9JAA7;C9JBY2;G5E9V7;G5E9V6;B7Z637;Q8IUR7-6;Q8IUR7-8;Q8IUR7-3;Q8IUR7-7;Q8IUR7-2;Q8IUR7	C9J8P8;C9JAA7;C9JBY2;G5E9V7;G5E9V6;B7Z637;Q8IUR7-6;Q8IUR7-8;Q8IUR7-3;Q8IUR7-7;Q8IUR7-2;Q8IUR7	Armadillo repeat-containing protein 8	ARMC8	19.9469	19.6142	21.0623	18.8528	19.9385	19.5041	19.1934	19.3423	18.6003	18.9549	18.9883	1	1	1	8.5	8.5	8.5	14.394	0.0017861	3.0628	78855000	1
429	B7Z683;Q12979-4;Q12979-2;Q12979;I3L1U8;I3L2P5;I3NI05;H0Y554;Q12979-3	B7Z683;Q12979-4;Q12979-2;Q12979;I3L1U8;I3L2P5;I3NI05;H0Y554;Q12979-3	Active breakpoint cluster region-related protein	ABR;BCR	17.9033	18.1971	18.9523	18.1247	18.3693	20.0409	16.714	17.346	NaN	16.7897	NaN	2	2	1	3.4	3.4	1.9	73.516	0.00022655	4.8031	132660000	6
430	B7Z685;D6RC99;E9PCN2;Q02153-2;Q02153-3;Q02153	B7Z685;D6RC99;E9PCN2;Q02153-2;Q02153-3;Q02153	Guanylate cyclase soluble subunit beta-1	GUCY1B3	NaN	NaN	17.3202	NaN	17.2935	16.9336	13.4198	NaN	NaN	NaN	NaN	2	2	2	4.2	4.2	4.2	62.761	0.003108	2.8123	19705000	2
431	B7Z6D5;Q96GQ7;A0A087X059	B7Z6D5;Q96GQ7;A0A087X059	Probable ATP-dependent RNA helicase DDX27	DDX27	19.9329	20.7255	18.7965	19.5144	19.0857	NaN	19.4354	20.1451	18.2104	19.238	18.8284	7	7	7	9.7	9.7	9.7	86.604	0	8.2088	342920000	9
432	K7EIJ4;B7Z7F3;Q9H6Z4-3;Q9H6Z4-2;Q9H6Z4	K7EIJ4;B7Z7F3;Q9H6Z4-3;Q9H6Z4-2;Q9H6Z4	Ran-binding protein 3	RANBP3	NaN	18.7725	22.2199	NaN	20.8554	19.6851	18.8338	16.9446	NaN	17.3602	18.2795	3	3	3	19.4	19.4	19.4	16.965	0	5.3978	100310000	4
433	F8WF16;B7Z8L1;F8W6A0;F8W0Q9;Q8NEY8-6;Q8NEY8-9;Q8NEY8-8;Q8NEY8-2;Q8NEY8-3;Q8NEY8	F8WF16;B7Z8L1;F8W6A0;F8W0Q9;Q8NEY8-6;Q8NEY8-9;Q8NEY8-8;Q8NEY8-2;Q8NEY8-3;Q8NEY8	Periphilin-1	PPHLN1	NaN	NaN	NaN	NaN	18.6528	NaN	NaN	NaN	NaN	NaN	NaN	1	1	1	3.6	3.6	3.6	34.86	0.001413	3.247	7830600	1
434	I3L3T4;I3L367;I3NI44;J3KQU4;I3L4I4;O75674-2;B7Z9E2;O75674;I3L1Q1;I3L4N3;I3L4G0;I3L1G1	I3L3T4;I3L367;I3NI44;J3KQU4;I3L4I4;O75674-2;B7Z9E2;O75674;I3L1Q1;I3L4N3;I3L4G0;I3L1G1	TOM1-like protein 1	TOM1L1	20.5866	NaN	NaN	NaN	19.5602	NaN	NaN	21.1536	20.2551	21.413	NaN	2	2	2	8.4	8.4	8.4	25.253	0.0084668	2.2287	100150000	5
435	B7Z9I1;Q5T4U5;P11310;P11310-2;H0YDT5;E9PJM9;E9PRX4	B7Z9I1;Q5T4U5;P11310;P11310-2	Medium-chain specific acyl-CoA dehydrogenase, mitochondrial	ACADM	24.7126	23.7634	24.5895	22.7955	24.8533	23.7645	23.9076	24.4671	24.2645	23.4517	23.6628	14	14	14	35.3	35.3	35.3	42.426	0	43.92	4301300000	92
436	B7Z9X4;H3BQJ4;Q9ULP0-2;Q9ULP0-8;Q9ULP0-5;Q9ULP0-7;Q9ULP0-3;Q9ULP0-6;Q9ULP0-4;Q9ULP0;H3BPQ3	B7Z9X4;H3BQJ4;Q9ULP0-2;Q9ULP0-8;Q9ULP0-5;Q9ULP0-7;Q9ULP0-3;Q9ULP0-6;Q9ULP0-4;Q9ULP0	Protein NDRG4	NDRG4	20.3018	NaN	18.6752	NaN	19.8276	NaN	NaN	NaN	17.8381	NaN	NaN	3	2	2	11.3	9.2	9.2	30.762	0	8.559	40264000	4
437	H0YLL8;B7ZAX5;Q01415-2;Q01415;H0YK30;H0YLL3	H0YLL8;B7ZAX5;Q01415-2;Q01415;H0YK30;H0YLL3	N-acetylgalactosamine kinase	GALK2	NaN	NaN	NaN	NaN	18.5654	20.537	18.6154	NaN	NaN	NaN	NaN	2	2	2	15.4	15.4	15.4	17.948	0.0023594	2.9443	25420000	3
438	B7ZC38;Q9NR46;B7ZC39;Q9NR46-2;F8WFB9;H7C1Z6	B7ZC38;Q9NR46;B7ZC39;Q9NR46-2	Endophilin-B2	SH3GLB2	21.6317	21.1203	22.9914	21.5221	23.0013	22.904	20.5456	20.8382	20.9598	20.8993	20.9296	8	8	8	23	23	23	44.361	0	52.795	1019500000	31
439	B7ZKJ8;Q14624-4;Q14624-3;Q14624-2;Q14624;H7C0L5	B7ZKJ8;Q14624-4;Q14624-3;Q14624-2;Q14624;H7C0L5	Inter-alpha-trypsin inhibitor heavy chain H4;70 kDa inter-alpha-trypsin inhibitor heavy chain H4;35 kDa inter-alpha-trypsin inhibitor heavy chain H4	ITIH4	21.4335	21.3747	21.7697	21.0297	22.063	20.4858	22.6829	19.3326	19.9493	22.105	20.7872	14	14	13	17.9	17.9	16.8	103.88	0	35.568	1721000000	77
440	B7ZM11;E7ENW1;Q8N5S3-2;Q8N5S3	B7ZM11;E7ENW1;Q8N5S3-2;Q8N5S3	Uncharacterized protein C2orf73	C2orf73	20.5287	NaN	NaN	22.9273	NaN	NaN	NaN	NaN	NaN	NaN	NaN	1	1	1	25.7	25.7	25.7	7.6165	0.0076293	2.3431	47444000	1
441	B7ZM99;Q6UB35;A0A087WVM4;Q4VXM1;Q4VXM0;H0Y327;Q6UB35-2	B7ZM99;Q6UB35;A0A087WVM4	Monofunctional C1-tetrahydrofolate synthase, mitochondrial	MTHFD1L	18.3386	NaN	18.2609	NaN	18.0509	17.4107	18.0119	17.5012	17.0015	18.4651	18.3612	3	3	2	3.2	3.2	2.6	105.89	0.00042644	3.9391	142070000	15
442	J3QR29;J3QKR5;B7ZVY7;J3QR44;P21127-6;P21127-9;P21127-8;P21127-3;P21127-2;P21127;Q5QPR4;Q5QPR3;P21127-12;P21127-4;P21127-5;P21127-10;Q9UQ88-4;Q9UQ88-3;Q9UQ88-2;Q9UQ88;Q9UQ88-10;Q9UQ88-5;Q9UQ88-9;Q9UQ88-8	J3QR29;J3QKR5;B7ZVY7;J3QR44;P21127-6;P21127-9;P21127-8;P21127-3;P21127-2;P21127;Q5QPR4;Q5QPR3;P21127-12;P21127-4;P21127-5;P21127-10;Q9UQ88-4;Q9UQ88-3;Q9UQ88-2;Q9UQ88;Q9UQ88-10;Q9UQ88-5;Q9UQ88-9	Cyclin-dependent kinase 11B;Cyclin-dependent kinase 11A	CDK11B;CDC2L1;CDK11A	17.6254	19.3274	20.0014	19.0568	19.9844	20.3458	19.4659	16.4263	15.5233	17.6809	17.2532	8	8	7	11.9	11.9	11.1	87.109	0	10.266	272720000	11
443	B8ZZB8;Q96F85-2;Q96F85	B8ZZB8;Q96F85-2;Q96F85	CB1 cannabinoid receptor-interacting protein 1	CNRIP1	21.0245	19.8093	21.0527	NaN	19.8908	21.9447	20.4714	NaN	20.5723	18.5836	18.9237	2	2	2	13.9	13.9	13.9	15.167	0.0058205	2.4432	169670000	6
444	B8ZZF8;Q9Y4Y9	B8ZZF8;Q9Y4Y9	U6 snRNA-associated Sm-like protein LSm5	LSM5	NaN	21.18	21.7375	20.6313	21.6748	NaN	NaN	19.893	NaN	NaN	NaN	1	1	1	29.7	29.7	29.7	7.0202	0.00022252	4.5271	47272000	6
445	B8ZZG1;Q9NZW5;C9J4Q3;C9JGI8	B8ZZG1;Q9NZW5;C9J4Q3	MAGUK p55 subfamily member 6	MPP6	19.5203	NaN	16.2116	NaN	NaN	21.3515	17.7284	NaN	NaN	NaN	NaN	6	6	6	16.1	16.1	16.1	48.757	0	18.743	130220000	7
446	B8ZZJ1;Q9BYI3;B8ZZA2;H7C0W7	B8ZZJ1;Q9BYI3;B8ZZA2;H7C0W7	Hyccin	FAM126A	18.8207	NaN	16.9947	NaN	17.3416	17.9889	18.8009	18.9215	17.5388	18.0145	19.0374	3	3	3	12.9	12.9	12.9	46.919	0	8.1799	68225000	10
447	J3KMX2;B9EGA3;Q92925-3;Q92925;Q92925-2;J3QWB6;F8VZ70;J3QQL7;F8VW95;C9JYI7	J3KMX2;B9EGA3;Q92925-3;Q92925;Q92925-2	SWI/SNF-related matrix-associated actin-dependent regulator of chromatin subfamily D member 2	SMARCD2	19.0492	21.1516	20.5445	21.1092	20.3994	17.3426	18.3064	19.8076	20.3752	20.747	20.7787	7	7	4	21.5	21.5	13.8	52.238	0	108.19	448010000	24
448	B9ZVT1;Q8IXT5	B9ZVT1;Q8IXT5	RNA-binding protein 12B	RBM12B	NaN	17.1309	17.0339	16.1613	18.0997	15.8609	NaN	NaN	15.0672	17.6627	15.771	3	3	3	3.7	3.7	3.7	102.7	0.00022051	4.3975	65284000	10
449	CON__Q92764;C4AM86;Q92764	CON__Q92764;C4AM86;Q92764	Keratin, type I cuticular Ha5	KRT35	18.5517	19.979	20.0167	24.1457	18.3641	19.8195	NaN	NaN	17.987	17.8515	NaN	11	2	2	20.9	3.8	3.8	47.596	0.00021529	4.0702	683920000	9
450	C4B7M2;Q96JI7-2;Q96JI7-3;Q96JI7	C4B7M2;Q96JI7-2;Q96JI7-3;Q96JI7	Spatacsin	SPG11	NaN	NaN	16.0173	NaN	NaN	15.2329	NaN	NaN	NaN	NaN	NaN	2	2	2	1.4	1.4	1.4	258.07	0.0042357	2.6962	18627000	5
451	C9IZF6;P41247-2;P41247	C9IZF6;P41247-2;P41247	Patatin-like phospholipase domain-containing protein 4	PNPLA4	NaN	NaN	18.791	NaN	18.9768	NaN	NaN	NaN	NaN	NaN	18.7559	2	2	2	16.8	16.8	16.8	20.649	0.0012237	3.3666	15535000	2
452	C9J3L8;C9J5W0;E9PAL7;C9IZQ1;P43307;P43307-2	C9J3L8;C9J5W0;E9PAL7;C9IZQ1;P43307;P43307-2	Translocon-associated protein subunit alpha	SSR1	24.7297	24.2213	24.686	23.3072	24.5143	23.4422	24.9993	24.3074	23.7299	24.5296	24.6704	4	4	4	19.2	19.2	19.2	29.573	0	19.911	3224900000	125
453	C9J0J7;G5E9Q6;P35080-2	C9J0J7;G5E9Q6;P35080-2	Profilin;Profilin-2	PFN2	23.865	24.0918	24.2784	24.0721	23.8493	26.9492	21.8367	20.9117	21.6227	NaN	21.1398	3	3	2	34.1	34.1	18.7	9.8402	0	28.835	1394500000	6
454	C9J0K6;P30626-2;P30626;P30626-3;B4DHQ6	C9J0K6;P30626-2;P30626;P30626-3;B4DHQ6	Sorcin	SRI	26.3671	25.6191	26.6659	26.1743	26.18	28.1963	24.2759	23.784	24.0769	24.7172	24.7675	12	12	12	85.2	85.2	85.2	17.605	0	142.71	11971000000	126
455	C9J177;Q15435-2;Q15435;C9JD73;H7C003;Q15435-5;Q15435-4;Q15435-3;B5MBZ8;H7C3Q5;H7C118;C9JRC4	C9J177;Q15435-2;Q15435;C9JD73;H7C003;Q15435-5;Q15435-4;Q15435-3;B5MBZ8	Protein phosphatase 1 regulatory subunit 7	PPP1R7	21.535	21.0638	22.4651	20.6755	21.661	21.4672	20.6953	20.7489	19.936	20.8252	20.9067	7	7	7	32.9	32.9	32.9	33.683	0	46.729	523070000	45
456	C9J2C4;O75190-2;O75190-3;O75190;C9JDX6;F8WCZ4;C9J2P2;E9PH18;C9JB42;C9JDR7;O75190-4;C9JN01;Q8WWF6	C9J2C4;O75190-2;O75190-3;O75190;C9JDX6;F8WCZ4;C9J2P2;E9PH18;C9JB42;C9JDR7;O75190-4	DnaJ homolog subfamily B member 6	DNAJB6	21.6991	20.0423	23.0582	20.7238	19.5494	22.581	21.0688	19.5467	21.4053	19.3874	20.0918	4	3	3	17.5	13.2	13.2	25.377	0.00021654	4.1555	331440000	3
457	G5E9D8;C9J2H1;Q86UX2-2;Q86UX2;A0A096LP62;Q86UX2-3;Q86UX2-4;H7C5A6	G5E9D8;C9J2H1;Q86UX2-2;Q86UX2;A0A096LP62;Q86UX2-3	Inter-alpha-trypsin inhibitor heavy chain H5	ITIH5	26.2654	25.9203	25.2432	25.8761	22.7325	21.5717	19.1618	20.6276	25.1911	25.4573	19.7772	16	16	16	27.1	27.1	27.1	78.437	0	76.267	15337000000	41
458	C9J2Y9;P30876;C9J4M6	C9J2Y9;P30876;C9J4M6	DNA-directed RNA polymerase;DNA-directed RNA polymerase II subunit RPB2	POLR2B	20.2519	20.8829	20.9908	21.1905	21.1883	20.4448	19.6004	19.2531	19.1221	20.4535	19.2886	19	19	19	19.6	19.6	19.6	133.06	0	31.88	1230200000	34
459	C9J381;P20839-2;P20839-4;P20839;P20839-3;P20839-7;P20839-5;P20839-6;C9K0R9;C9J029	C9J381;P20839-2;P20839-4;P20839;P20839-3;P20839-7;P20839-5;P20839-6;C9K0R9	Inosine-5-monophosphate dehydrogenase;Inosine-5-monophosphate dehydrogenase 1	IMPDH1	NaN	NaN	NaN	NaN	20.6978	NaN	NaN	NaN	NaN	NaN	NaN	5	4	4	14.6	13.1	13.1	55.277	0	30.197	44068000	4
460	C9J3D7;Q9UKG9;Q9UKG9-3	C9J3D7;Q9UKG9;Q9UKG9-3	Peroxisomal carnitine O-octanoyltransferase	CROT	16.8933	16.9382	NaN	18.3566	NaN	NaN	17.0756	16.668	17.3588	18.2932	17.187	3	3	3	7	7	7	65.883	0	7.9792	51230000	9
461	C9J3F6;Q92609;Q92609-2;C9JDR8	C9J3F6;Q92609;Q92609-2	TBC1 domain family member 5	TBC1D5	17.7234	17.8294	19.1356	17.722	NaN	17.9489	18.1906	17.3446	NaN	18.3148	17.7559	3	3	3	6.1	6.1	6.1	67.534	0	5.4708	89303000	5
462	C9J3M3;P58340;C9K0D3;P58340-2;P58340-5;P58340-4;P58340-3	C9J3M3;P58340;C9K0D3;P58340-2;P58340-5;P58340-4;P58340-3	Myeloid leukemia factor 1	MLF1	NaN	NaN	NaN	NaN	NaN	21.603	NaN	NaN	NaN	NaN	NaN	2	2	2	13.7	13.7	13.7	23.103	0	4.8893	31852000	2
463	C9JE01;C9JUS5;C9JBX7;C9J471;H0Y329;G8JLI5;Q9Y484;Q9Y484-3;Q9Y484-2;C9JVT3;C9J5L0;C9J0A8;C9JYH8	C9JE01;C9JUS5;C9JBX7;C9J471;H0Y329;G8JLI5;Q9Y484;Q9Y484-3;Q9Y484-2;C9JVT3;C9J5L0;C9J0A8;C9JYH8	WD repeat domain phosphoinositide-interacting protein 4	WDR45	18.8595	NaN	NaN	NaN	NaN	19.9675	18.0454	NaN	17.4246	NaN	NaN	2	2	2	15.8	15.8	15.8	17.995	0.0015959	3.1311	30892000	2
464	C9J494;Q9H000;Q9H000-2	C9J494;Q9H000;Q9H000-2	Probable E3 ubiquitin-protein ligase makorin-2	MKRN2	18.5463	18.5033	18.4829	18.3682	18.2544	22.0026	NaN	17.5655	NaN	18.4753	15.6584	4	4	4	11.4	11.4	11.4	46.68	0	8.1095	184350000	7
465	G5E9P4;C9J4B6;Q8N755-2;Q8N755;B5MC27	G5E9P4;C9J4B6;Q8N755-2;Q8N755;B5MC27	PQ-loop repeat-containing protein 3	PQLC3	NaN	20.8029	NaN	NaN	19.8048	NaN	18.6831	20.0895	18.355	17.3658	17.067	2	2	2	11.8	11.8	11.8	18.608	0	4.999	63624000	4
466	C9J4Z3;P61513;M0R0A1;Q6P4E4;E9PEL3;M0R2L6;G5E9R3;A6NKH3	C9J4Z3;P61513;M0R0A1;Q6P4E4;E9PEL3;M0R2L6;G5E9R3	60S ribosomal protein L37a	RPL37A	25.9461	26.5928	24.5189	26.1391	26.2783	23.2501	NaN	24.4938	23.6064	26.3056	23.2791	4	4	4	67.6	67.6	67.6	7.624	0	53.081	1938700000	20
467	C9J5N1;Q9BTE6;Q9BTE6-2;Q9BTE6-3;K7EQ85;L7N2F4	C9J5N1;Q9BTE6;Q9BTE6-2;Q9BTE6-3;K7EQ85;L7N2F4	Alanyl-tRNA editing protein Aarsd1	PTGES3L-AARSD1;AARSD1	NaN	NaN	17.3695	NaN	NaN	NaN	NaN	NaN	NaN	NaN	NaN	2	2	2	6.1	6.1	6.1	55.065	0.0083133	2.2655	8359300	2
468	C9J5X1;P08069;H0YMJ5	C9J5X1;P08069	Tyrosine-protein kinase receptor;Insulin-like growth factor 1 receptor;Insulin-like growth factor 1 receptor alpha chain;Insulin-like growth factor 1 receptor beta chain	IGF1R	17.2896	18.201	NaN	17.8959	16.9303	16.0511	16.7058	17.7581	17.749	17.2143	15.6623	4	4	4	3.2	3.2	3.2	154.79	0.00082645	3.5119	130380000	4
469	C9J650;P05408-2	C9J650;P05408-2	Neuroendocrine protein 7B2;N-terminal peptide;C-terminal peptide	SCG5	NaN	NaN	22.3415	NaN	22.3101	NaN	NaN	NaN	NaN	NaN	NaN	5	1	1	36.8	8.8	8.8	21.386	0	39.572	94629000	9
470	C9J719;C9JJ78;Q15125	C9J719;C9JJ78;Q15125	3-beta-hydroxysteroid-Delta(8),Delta(7)-isomerase	EBP	24.8314	21.4429	24.1038	25.1191	23.4684	22.052	25.4413	24.9722	24.8049	19.8332	24.8106	2	2	2	17.8	17.8	17.8	16.721	0	14.987	1062700000	22
471	F5GXT2;O43374-2;O43374;C9J798;F8W6L0;E7ERK1;H0YB35;E5RK78;E5RGQ8;H0YBU2;H0Y980	F5GXT2;O43374-2;O43374;C9J798;F8W6L0;E7ERK1;H0YB35	Ras GTPase-activating protein 4;Putative Ras GTPase-activating protein 4B	RASA4B;RASA4	16.8812	NaN	16.0085	NaN	16.5758	21.6235	NaN	NaN	NaN	NaN	NaN	9	9	9	12.3	12.3	12.3	85.357	0	16.877	196070000	7
472	E9PFH4;C9J7E5;Q9Y5L0-3;Q9Y5L0;Q9Y5L0-1;Q9Y5L0-5	E9PFH4;C9J7E5;Q9Y5L0-3;Q9Y5L0;Q9Y5L0-1;Q9Y5L0-5	Transportin-3	TNPO3	16.8355	18.4915	16.1421	18.5192	17.1704	NaN	18.494	16.9645	17.6704	18.2331	14.3369	3	3	3	4.7	4.7	4.7	96.669	0.00042481	3.8755	102060000	10
473	C9J7I2;F5H7K1;E7EWW0;Q7Z3J2-2;Q7Z3J2;H3BV68;H3BTI5;H3BVG8	C9J7I2;F5H7K1;E7EWW0;Q7Z3J2-2;Q7Z3J2;H3BV68	UPF0505 protein C16orf62	C16orf62	NaN	16.5527	16.1797	16.2483	NaN	17.4463	16.9645	14.5612	NaN	16.9481	15.1689	3	3	3	4.3	4.3	4.3	93.012	0.00062305	3.572	40076000	5
474	H7C5I5;C9J7K9;O15162-2;O15162;C9J9P4	H7C5I5;C9J7K9;O15162-2;O15162;C9J9P4	Phospholipid scramblase 1	PLSCR1	24.3919	20.2528	NaN	18.7358	NaN	21.858	24.2718	21.4426	23.76	23.1336	20.6566	3	3	3	21.6	21.6	21.6	18.91	0	5.4873	564090000	12
475	H7C0X4;C9J7S5;Q92685-2;Q92685	H7C0X4;C9J7S5;Q92685-2;Q92685	Dol-P-Man:Man(5)GlcNAc(2)-PP-Dol alpha-1,3-mannosyltransferase	ALG3	NaN	NaN	NaN	17.4792	16.8768	NaN	18.5997	17.6084	17.8832	17.3312	19.8367	2	2	2	6.2	6.2	6.2	36.898	0.00021877	4.2842	41678000	8
476	C9J8S2;Q99969	C9J8S2;Q99969	Retinoic acid receptor responder protein 2	RARRES2	NaN	NaN	21.4548	NaN	22.4947	NaN	NaN	NaN	NaN	NaN	18.967	3	3	3	32.1	32.1	32.1	17.813	0	8.3271	107700000	6
477	C9J8T6;Q14061	C9J8T6;Q14061	Cytochrome c oxidase copper chaperone	COX17	21.1289	NaN	22.3373	20.5276	22.7082	NaN	NaN	NaN	NaN	NaN	NaN	1	1	1	16.3	16.3	16.3	10.853	0	13.166	95738000	3
478	C9J9K3;P08865;A6NE09;C9JQR9	C9J9K3;P08865;A6NE09	40S ribosomal protein SA	RPSA;RPSAP58	26.0897	27.0973	26.9504	26.6298	26.9189	25.1632	26.681	25.99	25.7868	26.6055	26.0121	13	13	13	64	64	64	29.505	0	260.63	16387000000	251
479	C9J9V0;Q5THK1-3;Q5THK1-2;Q5THK1-4;Q5THK1	C9J9V0;Q5THK1-3;Q5THK1-2;Q5THK1-4;Q5THK1	Protein PRR14L	PRR14L	21.0251	21.2745	20.2663	21.0547	19.8327	19.7665	21.1055	20.595	NaN	20.8603	21.4466	1	1	1	9.4	9.4	9.4	19.347	0.0021705	2.9825	232530000	9
480	C9JA28;Q9UNL2;Q9UNL2-2	C9JA28;Q9UNL2;Q9UNL2-2	Translocon-associated protein subunit gamma	SSR3	21.5217	22.1087	19.7246	22.3458	18.515	17.452	22.43	22.7284	21.3614	22.6807	22.6493	1	1	1	8	8	8	20.161	0	9.3147	312050000	31
481	C9JAB2;Q16629-3;Q16629-2;Q16629-4;Q16629;F8WEA1	C9JAB2;Q16629-3;Q16629-2;Q16629-4;Q16629	Serine/arginine-rich splicing factor 7	SRSF7	25.7046	26.1724	26.2356	24.7323	26.3022	24.1988	24.9156	25.7753	25.0231	25.4409	24.9148	8	7	7	28.5	28.5	28.5	26.928	0	21.561	7603600000	49
482	C9JAW5;C9JNU6;Q9Y241;A8MV81;Q9Y241-2	C9JAW5;C9JNU6;Q9Y241;A8MV81;Q9Y241-2	HIG1 domain family member 1A, mitochondrial;HIG1 domain family member 1C	HIGD1A;HIGD1C	22.0475	22.435	24.0303	21.2984	23.2661	23.5663	22.0425	23.9093	21.9202	21.5637	23.8399	2	2	2	32.5	32.5	32.5	8.8131	0	27.335	388770000	29
483	C9JAX1;Q16595;H7C585;Q16595-2;Q16595-3	C9JAX1;Q16595;H7C585;Q16595-2;Q16595-3	Frataxin, mitochondrial;Frataxin intermediate form;Frataxin(56-210);Frataxin(78-210);Frataxin mature form	FXN	20.0577	NaN	21.3342	NaN	21.2097	NaN	20.1057	20.2504	21.2016	19.5259	18.7534	2	2	2	20.7	20.7	20.7	14.91	0	5.9099	97156000	7
484	C9JBF9;Q8N136-2;Q8N136	C9JBF9;Q8N136-2;Q8N136	Dynein assembly factor with WDR repeat domains 1	DAW1	19.1991	NaN	NaN	NaN	NaN	20.6813	NaN	NaN	18.8139	NaN	NaN	2	2	2	6.8	6.8	6.8	40.545	0.0014199	3.3052	94231000	2
485	E9PMC3;F5H8L4;C9JBG5;Q8NBJ9;Q8NBJ9-2	E9PMC3;F5H8L4;C9JBG5;Q8NBJ9;Q8NBJ9-2	SID1 transmembrane family member 2	SIDT2	19.438	19.4749	19.0679	19.0247	19.6271	NaN	19.7468	19.7258	19.3081	20.5458	20.6212	2	2	2	20	20	20	12.51	0.005654	2.4869	59683000	8
486	C9JBI3;P78330;C9JEJ7;F8WD74	C9JBI3;P78330	Phosphoserine phosphatase	PSPH	19.0794	21.497	18.7347	22.196	22.3698	22.0081	20.383	18.8396	18.9718	20.3351	NaN	3	3	3	18.7	18.7	18.7	20.745	0.00021345	3.9602	293630000	4
487	E9PNC7;E9PQX9;C9JCC6;Q14919;Q14919-2	E9PNC7;E9PQX9;C9JCC6;Q14919;Q14919-2	Dr1-associated corepressor	DRAP1	21.2504	21.8954	21.743	21.0423	21.4297	20.6514	20.1718	20.8064	20.35	20.7302	20.9888	2	2	2	14.1	14.1	14.1	16.658	0.0014193	3.3037	180280000	4
488	C9JE12;C9JCW7;Q9BVT8	C9JE12;C9JCW7;Q9BVT8	Transmembrane and ubiquitin-like domain-containing protein 1	TMUB1	22.1208	22.2192	20.4176	22.3138	19.988	20.5296	23.1156	22.8262	23.1066	20.9909	21.4522	4	4	4	34.9	34.9	34.9	16.12	0	5.2713	307550000	9
489	Q8N450;C9JD05;F8W946;Q9BXM9-2;Q9BXM9	Q8N450;C9JD05;F8W946;Q9BXM9-2;Q9BXM9	FSD1-like protein	FSD1L	NaN	NaN	NaN	NaN	NaN	18.9403	17.4166	NaN	NaN	NaN	NaN	1	1	1	4.8	4.8	4.8	34.58	0.00021763	4.2119	12882000	1
490	C9JE82;C9JVC9;Q9NY47-4;Q9NY47-2;Q9NY47-3;Q9NY47;Q9NY47-5	C9JE82;C9JVC9;Q9NY47-4;Q9NY47-2;Q9NY47-3;Q9NY47;Q9NY47-5	Voltage-dependent calcium channel subunit alpha-2/delta-2;Voltage-dependent calcium channel subunit alpha-2-2;Voltage-dependent calcium channel subunit delta-2	CACNA2D2	18.8466	16.0233	14.9958	17.3346	17.8271	NaN	NaN	15.2305	NaN	NaN	NaN	6	4	4	5.9	5.2	5.2	129.21	0	5.6442	72634000	6
491	C9JEH7;P22090	C9JEH7;P22090	40S ribosomal protein S4, Y isoform 1	RPS4Y1	20.6743	20.4157	NaN	NaN	18.9266	NaN	NaN	20.8428	19.0436	20.5941	NaN	12	4	2	42	17.6	13	29.383	0	16.042	159060000	14
492	C9JEJ2;P49585;H7C1T3;C9J050;C9J2E1;C9JPY0;H7BZN1;Q9Y5K3-2;Q9Y5K3-4;Q9Y5K3-3;Q9Y5K3;C9JVS0;F8WAZ5;F2Z2B1	C9JEJ2;P49585;H7C1T3;C9J050;C9J2E1	Choline-phosphate cytidylyltransferase A	PCYT1A	20.308	20.2456	19.476	20.102	20.281	21.3439	19.3959	20.1917	19.2315	19.3671	16.4807	5	5	5	18.4	18.4	18.4	43.263	0	11.202	412080000	19
493	C9JEV0;P25311;H7BZJ8	C9JEV0;P25311	Zinc-alpha-2-glycoprotein	AZGP1	18.9181	21.3236	20.5796	NaN	19.882	NaN	21.1697	NaN	NaN	21.6294	17.3757	3	3	3	21.6	21.6	21.6	26.353	0	18.113	200130000	9
494	C9JEV9;O95639-3;O95639-2;O95639;C9K0K2;B7Z7B0;H7C016	C9JEV9;O95639-3;O95639-2;O95639;C9K0K2;B7Z7B0;H7C016	Cleavage and polyadenylation specificity factor subunit 4	CPSF4	20.4782	22.4743	19.3272	21.4972	19.4458	17.9998	20.3905	18.4262	20.7606	20.6526	22.0462	2	2	2	12.8	12.8	12.8	23.653	0.0042259	2.6714	304200000	6
495	C9JF17;P05090;C9JX71;F8WBT9	C9JF17;P05090;C9JX71	Apolipoprotein D	APOD	25.419	25.765	23.76	23.0077	23.3415	27.7866	25.0807	22.8786	23.6553	24.1376	22.8185	7	7	6	33	33	30.2	24.158	0	127.67	5902500000	63
496	H7C0S2;C9JF58;Q8WVF1-2;Q8WVF1-3;Q8WVF1;Q8WVF1-4	H7C0S2;C9JF58;Q8WVF1-2;Q8WVF1-3;Q8WVF1;Q8WVF1-4	Protein OSCP1	OSCP1	18.0147	NaN	19.7011	NaN	18.7123	17.8529	NaN	NaN	NaN	NaN	NaN	2	2	2	13.3	13.3	13.3	29.145	0	4.891	32102000	5
497	C9JFE4;Q13098-5;Q13098;Q13098-7;A0A096LP07;A0A096LPJ3;A8K070;Q13098-6;J3QQX0;J3QS84;J3QS88;J3KTB0;J3QLE8;J3QLT0;J3QL53;J3KRE8;J3KSA5;J3KRJ4	C9JFE4;Q13098-5;Q13098;Q13098-7;A0A096LP07;A0A096LPJ3;A8K070;Q13098-6	COP9 signalosome complex subunit 1	GPS1	20.9185	21.9639	23.0665	20.7542	23.0657	21.5632	21.1901	19.1576	19.054	20.0312	19.9647	9	9	9	22.1	22.1	22.1	53.371	0	20.349	922100000	27
498	C9JFR7;P99999;CON__P62894	C9JFR7;P99999	Cytochrome c	CYCS	26.2118	25.1019	25.7587	25.3538	25.7056	24.4679	25.9667	25.2402	26.3771	25.4268	25.6045	6	6	6	57.4	57.4	57.4	11.333	0	21.962	4847600000	96
499	C9JFV4;Q8IZL8;E7EV54;I3L445;I3L4P1;I3L1P4;I3L4M7	C9JFV4;Q8IZL8;E7EV54	Proline-, glutamic acid- and leucine-rich protein 1	PELP1	20.2648	22.2398	21.5645	21.8557	21.8241	17.9186	20.7434	21.6272	19.3955	19.6724	20.7584	19	19	19	24.9	24.9	24.9	124.94	0	61.324	1249000000	76
500	C9JW66;J3KPK1;C9JFZ1;J3KQV8;O43426-5;O43426-4;O43426-2;O43426	C9JW66;J3KPK1;C9JFZ1;J3KQV8;O43426-5;O43426-4;O43426-2;O43426	Synaptojanin-1	SYNJ1	17.4696	NaN	18.4582	NaN	17.7007	16.8533	NaN	NaN	NaN	NaN	16.7046	2	2	2	3.9	3.9	3.9	77.594	0.001029	3.4682	44094000	2
501	C9JG41;Q9NQX7-2;Q9NQX7;F5H4I5;E7EUS6;B8ZZM6;Q9NQX7-3	C9JG41;Q9NQX7-2;Q9NQX7;F5H4I5;E7EUS6;B8ZZM6;Q9NQX7-3	Integral membrane protein 2C;CT-BRI3	ITM2C	21.4263	NaN	22.3191	17.9591	19.468	19.0457	NaN	17.1447	NaN	NaN	NaN	4	4	4	35	35	35	20.056	0	15.845	119020000	10
502	C9JG87;Q9NYK5;Q9NYK5-2	C9JG87;Q9NYK5;Q9NYK5-2	39S ribosomal protein L39, mitochondrial	MRPL39	21.8203	20.903	21.5069	20.2522	21.5123	19.3625	21.8346	21.7897	22.1937	21.2619	22.2436	8	8	8	30.6	30.6	30.6	34.032	0	15.459	726870000	30
503	C9JXQ7;C9JHH5;Q9Y6I9;C9JL43;C9JUC3;C9J7N0;A0A087WTU3	C9JXQ7;C9JHH5;Q9Y6I9;C9JL43;C9JUC3;C9J7N0;A0A087WTU3	Testis-expressed sequence 264 protein	TEX264	19.7781	NaN	19.5201	NaN	20.6934	NaN	21.1877	20.9959	20.7051	19.9471	20.2597	2	2	2	10.2	10.2	10.2	24.129	0.00021358	3.9655	145530000	3
504	C9JJU1;C9JMY2;C9JHH7;C9JWG4;C9JNK4;Q8WUX1	C9JJU1;C9JMY2;C9JHH7;C9JWG4;C9JNK4;Q8WUX1	Sodium-coupled neutral amino acid transporter 5	SLC38A5	NaN	NaN	NaN	20.4051	NaN	NaN	NaN	NaN	NaN	20.2288	NaN	1	1	1	10.4	10.4	10.4	17.467	0.0015924	3.1056	23556000	1
505	H7C0W2;C9JHL4;Q9H3P2;H7C3C2;F8W954;F8WF98;H7C2M8;C9JEM7;H7C2C7;H0Y3X6	H7C0W2;C9JHL4;Q9H3P2;H7C3C2;F8W954;F8WF98;H7C2M8;C9JEM7;H7C2C7;H0Y3X6	Negative elongation factor A	NELFA	NaN	20.1916	18.9114	19.509	19.8924	NaN	17.2453	18.4441	NaN	17.5894	17.9054	2	2	2	13.4	13.4	13.4	20.591	0.0063706	2.414	43646000	1
506	C9JPA8;C9JY46;C9JHN8;Q7L5D6-2;Q7L5D6	C9JPA8;C9JY46;C9JHN8;Q7L5D6-2;Q7L5D6	Golgi to ER traffic protein 4 homolog	GET4	19.1349	19.5952	20.6293	NaN	20.12	19.0033	19	NaN	19.0132	NaN	18.662	2	2	2	12.2	12.2	12.2	16.543	0.005138	2.5904	48982000	2
507	C9JHW1;E7ESB6;I1E4Y6;Q6Y7W6-4;Q6Y7W6-5;Q6Y7W6;Q6Y7W6-3;C9JW88;F8WCD5;C9JPV7;C9JXQ0;C9J0V6;C9JHT0;C9JRZ2;C9J7G1;B8ZZD2	C9JHW1;E7ESB6;I1E4Y6;Q6Y7W6-4;Q6Y7W6-5;Q6Y7W6;Q6Y7W6-3	PERQ amino acid-rich with GYF domain-containing protein 2	GIGYF2	20.3661	23.7916	19.1849	24.3198	19.5638	18.8541	19.9998	23.8914	22.7261	21.3431	20.7673	4	4	4	9.6	9.6	9.6	81.788	0	12.294	2095800000	24
508	C9JIF9;P13798;H7C393;C9JLK2;H7C1U0;F8WEH5	C9JIF9;P13798	Acylamino-acid-releasing enzyme	APEH	20.9744	20.8022	20.4891	18.8664	21.3843	18.9393	19.9429	18.3315	19.8007	19.3873	18.3464	9	9	9	14.4	14.4	14.4	81.673	0	27.15	454190000	26
509	C9JIZ1;C9J5E5;C9JHS7;C9JHZ8;C9JES8;C9JZI8;C9JT62;C9JK79;C9JBS3;C9JEJ8;A0A088AWM1;C9JHN6;C9JHS9;C9J739;C9JMQ6;C9JQ82	C9JIZ1;C9J5E5;C9JHS7;C9JHZ8;C9JES8;C9JZI8;C9JT62;C9JK79		HDLBP	NaN	19.2736	NaN	19.4789	18.9028	NaN	NaN	19.6738	NaN	NaN	NaN	6	1	1	38.8	7.6	7.6	24.708	0.00022624	4.7843	40364000	5
510	C9JJ19;P82930;A0A087WUZ8	C9JJ19;P82930;A0A087WUZ8	28S ribosomal protein S34, mitochondrial	MRPS34	22.5559	22.1176	22.5613	21.9632	22.7853	20.6193	22.4058	22.6263	22.2616	22.4109	22.7412	8	8	8	42.2	42.2	42.2	26.332	0	20.45	939020000	63
511	C9JJX6;E9PDC3;O00192-2;O00192	C9JJX6;E9PDC3;O00192-2;O00192	Armadillo repeat protein deleted in velo-cardio-facial syndrome	ARVCF	19.5385	18.9382	18.2686	17.8492	18.8741	19.2164	NaN	16.5649	17.493	17.6075	17.5394	7	7	7	11.9	11.9	11.9	96.827	0	22.154	193160000	22
512	C9JLU1;P52434;P52434-3;P52434-2;P52434-5;P52434-4	C9JLU1;P52434;P52434-3;P52434-2;P52434-5;P52434-4	DNA-directed RNA polymerases I, II, and III subunit RPABC3	POLR2H	19.8897	20.8379	21.0805	20.8	21.9095	17.9408	18.5137	19.0311	18.4257	19.4553	18.5161	4	4	4	31.5	31.5	31.5	16.996	0	8.1341	139770000	13
513	C9JN15;C9JM79;E9PG73;Q13427-2;Q13427	C9JN15;C9JM79;E9PG73;Q13427-2;Q13427	Peptidyl-prolyl cis-trans isomerase;Peptidyl-prolyl cis-trans isomerase G	PPIG	18.4951	20.5921	20.9809	18.8834	21.7131	NaN	NaN	19.4076	NaN	NaN	NaN	2	2	2	8.5	8.5	8.5	27.409	0.0016016	3.157	133900000	3
514	C9JME2;Q9Y4F1;Q9Y4F1-2;M0R262;M0QYB0;H0Y783;M0QXT1;Q9Y4F1-3	C9JME2;Q9Y4F1;Q9Y4F1-2	FERM, RhoGEF and pleckstrin domain-containing protein 1	FARP1	20.8604	17.5846	21.2271	18.0903	22.3091	20.2418	NaN	17.754	16.8527	14.2685	17.6748	16	16	15	15.6	15.6	15.6	122.09	0	40.207	936680000	38
515	C9JMV9	C9JMV9		ABHD14A-ACY1	NaN	NaN	NaN	17.0497	NaN	19.8633	18.5785	17.59	18.4421	NaN	NaN	3	2	0	7.7	3.9	0	56.435	0.0083102	2.264	63066000	2
516	H7C0U0;F8WCQ4;C9JNP8;Q9H300-2;Q9H300	H7C0U0;F8WCQ4;C9JNP8;Q9H300-2;Q9H300	Presenilins-associated rhomboid-like protein, mitochondrial;P-beta	PARL	20.1568	NaN	NaN	NaN	19.106	18.6729	20.7238	20.5513	20.6443	20.5981	20.6351	1	1	1	12.6	12.6	12.6	17.608	0.00123	3.4281	95897000	12
517	C9JNV2;P41223;P41223-2;C9JCD9	C9JNV2;P41223;P41223-2	Protein BUD31 homolog	BUD31	20.228	21.7673	21.1293	20.2975	21.5871	19.1144	20.1202	20.4118	20.8235	20.239	20.2065	3	3	3	23.5	23.5	23.5	13.568	0	12.201	161870000	21
518	C9JXB8;C9JNW5;P83731	C9JXB8;C9JNW5;P83731	60S ribosomal protein L24	RPL24	24.8449	25.7177	25.7651	25.234	26.0815	23.3094	23.5783	23.6334	23.0114	24.965	24.9354	5	5	5	39.7	39.7	39.7	14.369	0	17.009	2737900000	64
519	C9JNY7;H7C4X7;P05408	C9JNY7;H7C4X7;P05408	Neuroendocrine protein 7B2;N-terminal peptide;C-terminal peptide	SCG5	NaN	NaN	25.079	NaN	25.5843	NaN	NaN	NaN	NaN	NaN	NaN	5	5	1	37.1	37.1	9.3	21.457	0	107.56	771770000	28
520	C9JP00;Q9NR56-3;Q9NR56-4;Q9NR56-7;Q9NR56-6;Q9NR56-2;Q9NR56-5;Q9NR56;H7C4T5;Q86VM6;C9J4T8;B1AKI6;Q9NUK0-4;Q9NUK0-3;Q9NUK0-2;Q9NUK0	C9JP00;Q9NR56-3;Q9NR56-4;Q9NR56-7;Q9NR56-6;Q9NR56-2;Q9NR56-5;Q9NR56;H7C4T5;Q86VM6	Muscleblind-like protein 1	MBNL1	22.8221	23.3331	23.3957	22.6368	22.6134	21.78	21.4831	22.3786	20.7375	23.0348	23.4381	3	3	2	8.9	8.9	5.7	37.898	0	7.4892	1162700000	19
521	C9JQ41;H7C525;Q4VC31	C9JQ41;H7C525;Q4VC31	Coiled-coil domain-containing protein 58	CCDC58	21.4824	21.9889	21.6814	21.622	21.7872	20.764	22.1201	21.9171	22.3113	22.2239	22.18	2	2	2	21.5	21.5	21.5	15.296	0.00022528	4.7214	306730000	6
522	C9JQ42;P46976-2;P46976;G5E9W8;P46976-3;C9J8R8;C9J7C7	C9JQ42;P46976-2;P46976;G5E9W8;P46976-3	Glycogenin-1	GYG1	24.2621	21.9706	23.7112	22.0093	23.7264	24.1671	23.0018	21.3294	21.5595	20.6013	21.7786	5	5	5	21.1	21.1	21.1	29.978	0	16.609	1180100000	16
523	C9JQD4;O43447;H0YEL5;O43447-2;A6NM32	C9JQD4;O43447;H0YEL5;O43447-2	Peptidyl-prolyl cis-trans isomerase;Peptidyl-prolyl cis-trans isomerase H	PPIH	20.0243	22.384	22.298	21.2468	22.0652	20.0402	20.7753	20.3024	20.5794	21.1456	20.989	3	3	3	22.2	22.2	22.2	15.8	0.00022472	4.6865	367570000	10
524	E9PDR0;C9JQS9;E7EX59;P05166;P05166-2;E7EUY3;E7ETT1;E7ETT4;E9PEC3;F8WBI9;E7ENC1;H7C5C9;C9JVW9;C9JVY9;C9JAW3	E9PDR0;C9JQS9;E7EX59;P05166;P05166-2;E7EUY3;E7ETT1;E7ETT4;E9PEC3;F8WBI9	Propionyl-CoA carboxylase beta chain, mitochondrial	PCCB	23.5006	21.6324	21.4628	21.2323	21.9307	20.4972	23.0005	22.7724	23.7736	21.8451	23.8348	21	21	21	53.3	53.3	53.3	59.403	0	307.17	2647100000	131
525	C9JQV0;Q9BRJ6;H7C0T1;H7C2R9	C9JQV0;Q9BRJ6;H7C0T1;H7C2R9	Uncharacterized protein C7orf50	C7orf50	20.2764	23.5022	21.7084	21.854	22.2767	NaN	NaN	21.1472	18.6386	21.1471	19.6174	5	5	5	42.2	42.2	42.2	21.883	0	26.324	349610000	17
526	C9JQV3;Q8N1F8;H7C2J7;Q8N1F8-2;H7C236	C9JQV3;Q8N1F8	Serine/threonine-protein kinase 11-interacting protein	STK11IP	15.2302	14.7777	17.8331	NaN	17.7383	NaN	NaN	NaN	14.0489	14.0924	13.5509	5	5	5	5.7	5.7	5.7	120.26	0	9.6716	36321000	7
527	C9JR52;P21246	C9JR52;P21246	Pleiotrophin	PTN	20.5735	21.8159	25.713	23.6799	24.8857	NaN	NaN	21.2563	NaN	17.6557	NaN	4	4	4	23.5	23.5	23.5	18.877	0	5.7026	1089000000	15
528	C9JRD2;C9JXB9;P25686-2;P25686;C9J1G2;E7ETU0;C9JX00;Q8NHS0	C9JRD2;C9JXB9;P25686-2;P25686;C9J1G2;E7ETU0;C9JX00	DnaJ homolog subfamily B member 2	DNAJB2	22.3259	19.3527	22.0982	21.3949	21.8167	25.7041	17.752	17.336	20.6429	20.1294	18.8841	9	9	8	48.7	48.7	44.3	25.411	0	55.61	997740000	20
529	C9JRZ6;Q9NX63;F8WAR4	C9JRZ6;Q9NX63	MICOS complex subunit MIC19	CHCHD3	24.6935	23.4228	24.4885	24.4459	24.889	23.441	24.5904	23.8585	24.6158	23.2501	24.5297	6	6	6	26.7	26.7	26.7	26.694	0	135.71	4756600000	68
530	C9JTA8;Q3KRA6	C9JTA8;Q3KRA6	UPF0538 protein C2orf76	C2orf76	NaN	NaN	NaN	NaN	NaN	21.8489	NaN	NaN	NaN	NaN	NaN	2	2	2	28.2	28.2	28.2	9.6541	0.00022183	4.4846	22663000	2
531	C9JTE9;Q9UHQ4;Q9UHQ4-2;H7C5E2;B7Z2L0;H0Y7N8;C9IYK6;F8WB99;C9JGJ9;C9JP06;F8WDG1	C9JTE9;Q9UHQ4;Q9UHQ4-2;H7C5E2;B7Z2L0;H0Y7N8;C9IYK6;F8WB99	B-cell receptor-associated protein 29	BCAP29	21.8505	22.1839	20.675	21.6241	21.6338	21.2545	21.4091	20.6251	20.6567	20.8502	21.653	6	6	6	25.7	25.7	25.7	26.953	0	18.237	544490000	31
532	C9JTT8;Q68DU7;H7C1N3;O15155-2;O15155	C9JTT8;Q68DU7;H7C1N3;O15155-2;O15155	BET1 homolog	BET1;DKFZp781C0425	NaN	NaN	23.3934	NaN	24.312	NaN	NaN	22.8086	NaN	22.5529	22.6686	1	1	1	11.2	11.2	11.2	11.056	0	5.005	260060000	4
533	E9PEC4;C9JUH3;Q9BSQ5-3;Q9BSQ5;Q9BSQ5-2;Q9BSQ5-4	E9PEC4;C9JUH3;Q9BSQ5-3;Q9BSQ5;Q9BSQ5-2;Q9BSQ5-4	Cerebral cavernous malformations 2 protein	CCM2	20.8872	18.7882	18.3937	19.9442	18.357	19.9158	20.5016	20.9587	20.1376	19.3435	20.2775	2	2	2	9.6	9.6	9.6	29.794	0.0031098	2.8196	164390000	2
534	C9JV77;P02765;CON__P12763	C9JV77;P02765	Alpha-2-HS-glycoprotein;Alpha-2-HS-glycoprotein chain A;Alpha-2-HS-glycoprotein chain B	AHSG	22.2221	24.9799	22.6711	28.2006	23.7658	24.5283	23.2686	NaN	NaN	22.949	21.1267	8	8	8	36.7	36.7	36.7	39.411	0	304.02	7034800000	117
535	C9JVE2;Q96GG9;C9JRU6;C9J0B2;C9JUW4;C9J8R4	C9JVE2;Q96GG9;C9JRU6;C9J0B2;C9JUW4;C9J8R4	DCN1-like protein;DCN1-like protein 1	DCUN1D1	18.0261	18.3621	18.6844	19.4073	18.5362	NaN	17.8128	17.2908	18.5587	19.3493	NaN	2	2	2	9.8	9.8	9.8	28.305	0	8.4192	49633000	6
536	C9JVN9;Q9H9P8-2;Q9H9P8;G3V272;G3V5S1	C9JVN9;Q9H9P8-2;Q9H9P8;G3V272	L-2-hydroxyglutarate dehydrogenase, mitochondrial	L2HGDH	19.5874	20.3703	20.4655	18.8255	20.8328	NaN	18.2201	19.8535	19.8564	16.9266	18.7749	6	6	6	17.5	17.5	17.5	48.475	0	10.975	255090000	15
537	C9JW69;P18754;P18754-2;C9JRH2;C9JMJ4;C9J3R0;C9JQZ4	C9JW69;P18754;P18754-2;C9JRH2;C9JMJ4;C9J3R0;C9JQZ4	Regulator of chromosome condensation	RCC1	21.6464	23.1475	21.1279	23.0955	20.5668	20.5629	20.2574	22.1313	21.1663	20.1747	21.6507	9	9	9	31.7	31.7	31.7	39.584	0	54.91	819180000	36
538	C9JW74;Q5EB52-2;Q5EB52;R4GN52;C9JWU9;C9JSW2;Q5EB52-3;C9JRA9;C9JCM6	C9JW74;Q5EB52-2;Q5EB52;R4GN52;C9JWU9;C9JSW2;Q5EB52-3	Mesoderm-specific transcript homolog protein	MEST	19.8246	17.8065	19.5422	NaN	19.8881	16.632	NaN	18.9128	NaN	NaN	17.9568	3	3	3	16.2	16.2	16.2	34.348	0.0014231	3.3366	53923000	5
539	C9JWC5;Q8IYM9-2;Q8IYM9;C9JIU5;C9J060;H7C376;H7C262;H7C2K0;H7BZD3	C9JWC5;Q8IYM9-2;Q8IYM9;C9JIU5;C9J060	E3 ubiquitin-protein ligase TRIM22	TRIM22	19.7817	20.1555	18.9573	19.3248	15.9921	19.7938	20.7808	20.1727	20.1737	20.3858	20.5783	5	5	5	20.3	20.3	20.3	34.866	0	6.6	240760000	10
540	C9JYY6;Q92823-3;Q92823-6;Q92823-2;Q92823;Q92823-5;F8W775;Q92823-4;A0A087X2B3;C9JH43;C9JUR7;C9JF43	C9JYY6;Q92823-3;Q92823-6;Q92823-2;Q92823;Q92823-5;F8W775;Q92823-4;A0A087X2B3	Neuronal cell adhesion molecule	NRCAM	22.5702	15.5303	19.5837	15.5251	20.7117	22.2696	NaN	19.2833	NaN	20.361	18.205	18	18	18	23.5	23.5	23.5	133.81	0	142.04	1055200000	43
541	C9JZ87;Q9NUM4;F2Z3N7;C9J998	C9JZ87;Q9NUM4;F2Z3N7	Transmembrane protein 106B	TMEM106B	22.1674	NaN	22.1511	18.836	22.0843	NaN	21.0656	20.5919	21.4374	20.4164	19.486	3	3	3	36.4	36.4	36.4	12.201	0	6.3934	176930000	3
542	C9JZR2;O60716-21;O60716-19;O60716-18;O60716-17;O60716-13;O60716-11;O60716-10;O60716-9;O60716-5;O60716-3;O60716-2;O60716;O60716-24;O60716-23;O60716-22;O60716-20;O60716-16;O60716-15;O60716-14;O60716-12;O60716-8;O60716-7;O60716-6;O60716-4;O60716-29;O60716-27;O60716-26;O60716-25;O60716-32;O60716-31;O60716-30;O60716-28;E9PRE2;E9PKY0;H0YC95;E9PKL1	C9JZR2;O60716-21;O60716-19;O60716-18;O60716-17;O60716-13;O60716-11;O60716-10;O60716-9;O60716-5;O60716-3;O60716-2;O60716;O60716-24;O60716-23;O60716-22;O60716-20;O60716-16;O60716-15;O60716-14;O60716-12;O60716-8;O60716-7;O60716-6;O60716-4;O60716-29;O60716-27;O60716-26;O60716-25;O60716-32;O60716-31;O60716-30;O60716-28	Catenin delta-1	CTNND1	24.967	25.3541	23.6239	25.0176	24.0968	23.59	25.2065	25.7205	25.2711	25.2746	25.071	35	35	35	48.6	48.6	48.6	104.85	0	323.31	20399000000	488
543	C9K058;H7BZ14;Q9H2H8;F8WC82;C9J4N2;B8ZZ77;Q9H2H8-2	C9K058;H7BZ14;Q9H2H8;F8WC82;C9J4N2;B8ZZ77;Q9H2H8-2	Peptidyl-prolyl cis-trans isomerase;Peptidyl-prolyl cis-trans isomerase-like 3	PPIL3	21.0327	21.5844	21.6003	NaN	19.409	21.073	NaN	NaN	NaN	NaN	NaN	2	2	2	26.2	26.2	26.2	9.0341	0.00022188	4.4857	68228000	4
544	C9K0W8;H3BU86;O14662-2;O14662-4;O14662-5;O14662;O14662-6;Q96NX8;F8W9Z6;B7ZBM8;O14662-3	C9K0W8;H3BU86;O14662-2;O14662-4;O14662-5;O14662;O14662-6	Syntaxin-16	STX16;STX16-NPEPL1	20.4822	18.5388	20.7266	19.7016	20.3527	17.9482	20.4867	19.5508	17.5895	20.0547	19.2867	3	3	3	11.1	11.1	11.1	35.081	0	10.995	200870000	24
545	CON__A2AB72	CON__A2AB72			NaN	19.7031	17.9185	23.6804	NaN	16.3911	NaN	NaN	NaN	NaN	NaN	5	2	2	7.1	2.4	2.4	51.152	0	20.348	482790000	5
546	F8W7U0;CON__ENSEMBL:ENSBTAP00000001528;Q15811-6;Q15811-12;Q15811-11;Q15811-3;Q15811-10;Q15811-7;Q15811-2;Q15811-4;Q15811-9;Q15811-8;Q15811	F8W7U0;CON__ENSEMBL:ENSBTAP00000001528;Q15811-6;Q15811-12;Q15811-11;Q15811-3;Q15811-10;Q15811-7;Q15811-2;Q15811-4;Q15811-9;Q15811-8;Q15811	Intersectin-1	ITSN1	16.9592	17.5733	NaN	NaN	NaN	NaN	17.6106	16.9381	15.1001	17.6138	15.7218	1	1	1	1.1	1.1	1.1	130.01	0	8.6244	64572000	3
547	CON__O43790;O43790;U3KPR1	CON__O43790;O43790	Keratin, type II cuticular Hb6	KRT86	21.3349	29.7127	28.4261	32.2791	21.6201	27.9331	19.1805	20.8456	20.1685	19.5826	20.3328	50	49	3	87.4	87.4	10.7	53.5	0	323.31	228550000000	1239
548	CON__O76009;O76009;CON__Q6NTB9	CON__O76009;O76009;CON__Q6NTB9	Keratin, type I cuticular Ha3-I	KRT33A	NaN	21.138	NaN	22.5813	NaN	18.5186	NaN	NaN	NaN	NaN	NaN	32	4	4	67.6	13.1	13.1	45.935	0	21.891	268760000	8
549	CON__O76011	CON__O76011			NaN	26.5929	25.0641	29.4032	18.3922	24.4691	18.4277	NaN	18.6809	18.0442	19.2375	36	19	1	90.6	53.8	3	44.689	0	323.31	21817000000	205
550	CON__O76013;O76013;O76013-2	CON__O76013;O76013;O76013-2	Keratin, type I cuticular Ha6	KRT36	20.7723	24.3502	23.5738	27.7391	17.7758	21.0198	20.4325	20.3842	20.3648	20.6417	19.6647	33	29	21	65.7	60.4	44.8	52.247	0	293.89	8328100000	122
551	CON__O76015;O76015;REV__Q7Z3S9-2	CON__O76015;O76015	Keratin, type I cuticular Ha8	KRT38	20.9751	26.1926	25.4618	29.8416	19.5726	23.673	20.4901	16.6041	15.7373	NaN	NaN	30	26	14	85.3	77.6	61.6	50.49	0	323.31	28687000000	220
552	CON__O95678;O95678;CON__P07744;H0YID6;Q13515	CON__O95678;O95678	Keratin, type II cytoskeletal 75	KRT75	18.3835	27.2396	24.2504	28.3734	18.1964	24.2379	NaN	17.7116	16.6447	NaN	17.8838	38	18	15	50.1	29.6	24.7	59.504	0	262.2	19150000000	77
553	CON__P00761	CON__P00761			28.9951	28.6513	28.593	28.5182	28.3656	28.3649	28.781	28.5234	28.5427	28.2743	28.3848	4	4	4	25.1	25.1	25.1	24.409	0	185.51	58619000000	121
554	CON__P01966	CON__P01966			25.6281	24.1849	22.433	23.351	24.7065	22.6717	23.5615	21.6734	22.6608	23.4822	21.1318	5	1	1	34.5	10.6	10.6	15.184	0.00022085	4.4139	1491200000	96
555	CON__P02533;P02533;K7ENV3;CON__Q7Z3Y9;Q7Z3Y9	CON__P02533;P02533	Keratin, type I cytoskeletal 14	KRT14	31.554	32.2997	29.3688	32.3813	25.0465	28.7547	31.6747	32.1108	31.8304	32.4016	31.6089	52	52	11	80.3	80.3	31.6	51.621	0	323.31	1232800000000	7796
556	CON__P02538;P02538	CON__P02538;P02538	Keratin, type II cytoskeletal 6A	KRT6A	29.8659	29.7288	26.8682	31.0905	25.1013	27.2845	30.2277	29.7584	30.2214	31.2356	29.77	58	35	5	67	50.9	7.8	60.044	0	323.31	410750000000	1924
557	CON__P02768-1;P02768;B7WNR0;H0YA55;D6RHD5;C9JKR2;P02768-2;A0A087WWT3;Q8IUK7;H7C013	CON__P02768-1;P02768;B7WNR0;H0YA55;D6RHD5;C9JKR2;P02768-2;A0A087WWT3;Q8IUK7	Serum albumin	ALB	30.4376	32.0136	29.9287	29.976	30.7617	29.8206	31.3927	26.8525	28.567	31.521	28.5642	60	60	53	80	80	74.4	69.366	0	323.31	767690000000	4649
558	CON__P02769	CON__P02769			18.6878	NaN	17.2715	NaN	NaN	NaN	NaN	NaN	NaN	NaN	NaN	8	1	1	8.9	2	2	69.293	0.0079718	2.2976	26122000	1
559	CON__P04259	CON__P04259			21.6819	22.1306	18.74	24.705	NaN	20.3134	NaN	NaN	NaN	20.2464	19.6313	56	2	1	65.4	4.4	1.4	59.998	0	40.757	1407700000	9
560	CON__P05784	CON__P05784			18.1021	NaN	18.8391	16.711	19.9203	NaN	16.213	21.0007	16.8035	18.251	20.0742	12	2	2	28.1	10.2	10.2	47.538	0	5.7795	177730000	8
561	CON__P05787;P05787;P05787-2;F8VUG2;F8W1U3;F8VP67;CON__Q9H552;F8VRG4;CON__H-INV:HIT000016045;F8VQY3;CON__REFSEQ:XP_092267;Q8IWY7;H0YIB2	CON__P05787;P05787;P05787-2;F8VUG2;F8W1U3	Keratin, type II cytoskeletal 8	KRT8	28.7695	29.216	28.3661	29.1116	27.8629	24.9698	28.1714	28.1455	28.3622	28.2036	28.0395	44	32	17	78.9	67.1	43.1	53.704	0	323.31	122940000000	1181
562	CON__P08727;K7EMS3	CON__P08727;K7EMS3		KRT19	31.4518	31.4555	28.1152	31.2285	26.1017	27.6974	31.4125	31.0945	31.557	31.1467	31.2222	46	33	1	92.2	80.5	7.5	44.091	0	323.31	739720000000	6065
563	CON__P08729	CON__P08729			27.5671	28.8593	24.5121	25.6439	21.7346	23.9536	23.4194	27.4617	26.4075	25.0777	21.618	38	30	3	64.2	56.1	2.1	51.417	0	323.31	38448000000	336
564	CON__P08730-1	CON__P08730-1			23.0873	24.6007	20.3878	22.8055	18.5112	20.5767	22.7281	20.3153	21.4355	25.8234	25.9048	21	2	2	41.6	5.7	5.7	47.754	0	14.631	5526800000	57
565	CON__P08779;P08779;K7ENW6;CON__Q9Z2K1;CON__Q3ZAW8	CON__P08779;P08779	Keratin, type I cytoskeletal 16	KRT16	26.5341	26.8677	23.7047	29.3789	19.3219	23.7868	27.7218	27.5052	28.3724	29.338	28.0739	49	31	28	83.3	59.6	59.6	51.267	0	323.31	88151000000	809
566	CON__P12035;P12035	CON__P12035;P12035	Keratin, type II cytoskeletal 3	KRT3	22.0175	21.3056	17.3367	21.37	NaN	15.8609	21.4803	21.5838	21.7482	21.2889	21.3532	16	3	2	16.7	7.5	5.9	64.503	0	8.8607	861180000	66
567	CON__P13645;P13645	CON__P13645;P13645	Keratin, type I cytoskeletal 10	KRT10	22.842	23.1656	23.3251	22.7351	21.3514	21.8089	22.2255	22.4482	21.5052	21.8145	22.2428	18	12	10	27.8	21.6	20.1	59.51	0	60.62	1954400000	46
568	CON__P13646-1;K7EQH6;K7EMJ2	CON__P13646-1			31.7079	27.664	24.7029	27.7304	20.5485	25.459	31.0212	30.5958	31.2975	30.3454	30.2249	40	34	4	73.4	62.9	4.1	49.586	0	323.31	419620000000	1809
569	CON__P13647;P13647;F8W0C6;H0YIN9;F8VV57;F8VU69	CON__P13647;P13647	Keratin, type II cytoskeletal 5	KRT5	32.858	32.8862	29.8984	32.632	26.3305	29.4446	32.4768	32.54	32.6933	32.7796	32.2145	62	62	4	64.9	64.9	7.5	62.378	0	323.31	1967600000000	5946
570	CON__P19012;A8MT21;P19012-2;C9JTG5	CON__P19012;A8MT21;P19012-2	Keratin, type I cytoskeletal 15	KRT15	27.1222	27.4425	21.9546	28.1296	20.9503	22.9139	25.4357	23.3199	24.8278	24.6795	23.809	39	25	2	94.3	73.7	4.8	49.167	0	323.31	25958000000	354
571	CON__P19013;P19013	CON__P19013;P19013	Keratin, type II cytoskeletal 4	KRT4	20.9579	NaN	20.1473	20.0493	NaN	NaN	NaN	NaN	NaN	NaN	18.6101	9	4	4	15.5	7.6	7.6	63.91	0	23.996	175420000	3
572	CON__P35527;P35527;K7EQQ3	CON__P35527;P35527	Keratin, type I cytoskeletal 9	KRT9	19.4882	20.7582	20.2446	21.5481	19.3393	20.271	20.3569	20.9752	19.2639	21.2993	19.3951	9	8	8	17.5	16.4	16.4	62.129	0	30.063	589840000	29
573	CON__P35908;P35908;CON__Q3TTY5	CON__P35908;P35908	Keratin, type II cytoskeletal 2 epidermal	KRT2	20.2272	19.3549	19.2708	19.8561	15.341	19.4609	18.5608	19.8028	18.7818	16.7283	18.6239	19	6	6	24.2	11.3	11.3	65.865	0	24.625	325740000	14
574	CON__P48668;P48668	CON__P48668;P48668	Keratin, type II cytoskeletal 6C	KRT6C	22.3681	26.1573	21.2704	25.8109	NaN	22.1113	20.0709	19.1769	19.2944	21.3333	20.5653	57	7	3	67	9	3.9	60.024	0	134.54	5500300000	48
575	CON__P78386;P78386;F5GYI5	CON__P78386;P78386;F5GYI5	Keratin, type II cuticular Hb5	KRT85	17.4179	26.567	24.6454	29.1281	NaN	24.7568	16.433	17.8052	20.7072	18.9874	NaN	45	21	16	81.9	44.2	37.3	55.802	0	323.31	26771000000	378
576	CON__Q04695;Q04695;F5GWP8;K7EPJ9;K7ESE1;K7ELP7	CON__Q04695;Q04695;F5GWP8	Keratin, type I cytoskeletal 17	KRT17	28.0916	30.4758	27.2752	30.1014	22.09	26.717	27.9787	27.351	27.9512	29.4326	28.4168	49	26	7	87.5	62.5	26.9	48.105	0	323.31	173850000000	2256
577	CON__Q14525;Q14525;A0A087X2I6	CON__Q14525;Q14525;A0A087X2I6	Keratin, type I cuticular Ha3-II	KRT33B	27.3095	28.6357	27.127	31.5783	22.8675	27.1959	26.8682	26.5114	26.9021	25.6949	26.0059	41	40	14	92.1	92.1	27.7	46.213	0	323.31	132380000000	1132
578	CON__Q14533;A0A087X106;Q14533	CON__Q14533;A0A087X106;Q14533	Keratin, type II cuticular Hb1	KRT81	NaN	17.6684	NaN	22.4873	NaN	NaN	NaN	NaN	NaN	NaN	NaN	49	2	2	78.4	5	5	54.971	0	8.1075	194810000	7
579	CON__Q14CN4-1;Q14CN4-3;Q14CN4-2;Q14CN4;CON__Q6IME9;H0YIG3	CON__Q14CN4-1;Q14CN4-3;Q14CN4-2;Q14CN4;CON__Q6IME9	Keratin, type II cytoskeletal 72	KRT72	NaN	NaN	NaN	18.3554	NaN	NaN	NaN	NaN	NaN	NaN	NaN	10	2	0	11.9	4.7	0	55.877	0.0016071	3.2041	12074000	2
580	CON__Q9UE12;CON__Q15323;Q15323	CON__Q9UE12;CON__Q15323;Q15323	Keratin, type I cuticular Ha1	KRT31	17.6505	27.2715	25.4947	30.3685	17.167	25.5411	17.6612	19.0082	19.0811	14.3613	NaN	37	18	7	88.2	51.2	29.1	47.237	0	323.31	47736000000	331
581	E9PHK0;CON__Q2KIS7;P05452	E9PHK0;CON__Q2KIS7;P05452	Tetranectin	CLEC3B	19.5491	19.9499	18.9554	NaN	20.4001	NaN	22.0361	NaN	NaN	19.5554	NaN	2	2	2	14.4	14.4	14.4	17.794	0.0002139	3.9891	99434000	5
582	CON__Q32MB2;Q86Y46;Q86Y46-2;H0YIC5;CON__Q3SY84;Q3SY84	CON__Q32MB2;Q86Y46;Q86Y46-2;H0YIC5;CON__Q3SY84;Q3SY84	Keratin, type II cytoskeletal 73;Keratin, type II cytoskeletal 71	KRT73;KRT71	18.4885	NaN	16.7375	20.3448	NaN	NaN	20.243	19.5097	19.3024	20.0429	19.7415	10	3	2	17.8	9.3	7	58.923	0.0029172	2.8217	315280000	10
583	CON__Q3KNV1;P08729	CON__Q3KNV1;P08729	Keratin, type II cytoskeletal 7	KRT7	23.9554	24.6021	20.8758	20.562	17.934	20.1267	20.4741	23.5694	22.7861	21.474	17.5092	38	4	3	67.6	5.5	4.3	51.385	0	6.9739	2442100000	43
584	CON__Q3SX09	CON__Q3SX09			NaN	19.7944	19.6611	NaN	20.3967	NaN	19.5548	NaN	19.8625	NaN	NaN	3	1	0	14.9	5.5	0	22.06	0.0014242	3.3398	53264000	1
585	CON__Q5XQN5	CON__Q5XQN5			24.9965	26.1671	24.5389	25.9558	24.3479	21.1028	24.5623	24.8879	25.1035	24.8417	24.4409	47	4	0	46.3	5.2	0	62.936	0	23.546	12943000000	43
586	CON__Q6IFU5;Q6A162;G3V1C2	CON__Q6IFU5;Q6A162;G3V1C2	Keratin, type I cytoskeletal 40	KRT40	NaN	NaN	NaN	21.2496	NaN	NaN	NaN	NaN	NaN	NaN	NaN	6	2	2	10.9	3.9	3.9	48.139	0.00062409	3.5985	47373000	2
587	CON__Q6IFU6;Q6A163;J3QRE9	CON__Q6IFU6;Q6A163	Keratin, type I cytoskeletal 39	KRT39	19.8605	21.2369	20.3499	25.9738	NaN	20.4992	NaN	NaN	NaN	NaN	17.7418	24	23	21	54.2	52.7	49.1	55.651	0	187.51	2335200000	51
588	CON__Q6IFX2	CON__Q6IFX2			NaN	18.0494	NaN	16.9677	NaN	NaN	17.2927	17.3036	18.2099	19.5521	17.7073	27	2	2	37.8	7.1	7.1	50.133	0.00041762	3.6508	66253000	5
589	CON__Q6KB66-1;Q6KB66-2;Q6KB66;Q6KB66-3;CON__Q0VBK2	CON__Q6KB66-1;Q6KB66-2;Q6KB66;Q6KB66-3	Keratin, type II cytoskeletal 80	KRT80	18.9568	20.3054	16.3863	21.9783	17.3332	15.8367	17.1846	NaN	16.0503	17.3655	NaN	9	9	9	23.5	23.5	23.5	50.525	0	29.122	243440000	11
590	CON__Q6NT21;P78385;CON__P78385	CON__Q6NT21;P78385;CON__P78385	Keratin, type II cuticular Hb3	KRT83	23.2674	26.198	25.4445	29.2684	17.7086	25.0461	22.8366	21.8683	22.7561	21.6087	21.2196	50	14	9	89	33.5	24.1	54.195	0	323.31	28518000000	284
591	CON__Q7Z3Y7;Q7Z3Y7;CON__Q148H6;CON__Q7Z3Y8;Q7Z3Y8	CON__Q7Z3Y7;Q7Z3Y7;CON__Q148H6	Keratin, type I cytoskeletal 28	KRT28	19.3997	20.0966	19.6216	25.7446	NaN	17.253	NaN	NaN	NaN	14.9186	17.6144	14	11	10	34	28.8	28.8	53.025	0	249.44	1658400000	30
592	CON__Q7Z794;Q7Z794	CON__Q7Z794;Q7Z794	Keratin, type II cytoskeletal 1b	KRT77	NaN	21.8753	24.5598	23.9913	15.5837	22.7423	19.7909	18.1137	16.9901	17.0624	NaN	22	17	12	42.6	37.5	25.1	61.802	0	104.33	1840600000	21
593	CON__Q8IUT8	CON__Q8IUT8			NaN	18.3449	NaN	20.1981	NaN	NaN	NaN	NaN	NaN	NaN	NaN	36	1	0	80.5	3.7	0	49.411	0.004221	2.6655	38396000	1
594	CON__Q8N1A0;Q8N1A0-2;Q8N1A0	CON__Q8N1A0;Q8N1A0-2;Q8N1A0	Keratin-like protein KRT222	KRT222	NaN	20.4603	NaN	NaN	NaN	NaN	NaN	NaN	NaN	NaN	NaN	4	3	3	16.9	13.9	13.9	34.157	0	31.023	30296000	2
595	CON__Q922U2	CON__Q922U2			NaN	NaN	NaN	NaN	NaN	NaN	NaN	18.1175	NaN	19.3719	19.0339	36	1	1	39.8	2.4	2.4	61.766	0.0079777	2.3074	50987000	2
596	CON__Q9BYQ5;Q9BYR2;Q9BQ66;Q9BYQ5;Q9BYR0;A0A087WX21	CON__Q9BYQ5;Q9BYR2;Q9BQ66;Q9BYQ5;Q9BYR0;A0A087WX21	Keratin-associated protein 4-5;Keratin-associated protein 4-12;Keratin-associated protein 4-6;Keratin-associated protein 4-7	KRTAP4-5;KRTAP4-12;KRTAP4-6;KRTAP4-7	NaN	20.6623	NaN	25.2468	NaN	19.6841	NaN	NaN	NaN	NaN	NaN	3	3	2	13.7	13.7	9.3	21.825	0	39.705	685850000	5
597	CON__Q9BYR4;Q9BYR4	CON__Q9BYR4;Q9BYR4	Keratin-associated protein 4-3	KRTAP4-3	NaN	NaN	NaN	22.268	NaN	NaN	NaN	NaN	NaN	NaN	NaN	2	2	2	12.8	12.8	12.8	20.504	0.00021659	4.1558	70708000	2
598	CON__Q9BYR8;Q9BYR8	CON__Q9BYR8;Q9BYR8	Keratin-associated protein 3-1	KRTAP3-1	NaN	26.4949	24.6375	29.6502	NaN	24.2657	NaN	NaN	NaN	NaN	NaN	3	3	3	55.1	55.1	55.1	10.539	0	29.059	2950200000	29
599	F5H1T9;CON__Q9BYR9;F5H6S0;Q9BYT5;Q9BYU5;Q9BYR9;P0C7H8	F5H1T9;CON__Q9BYR9;F5H6S0;Q9BYT5;Q9BYU5;Q9BYR9;P0C7H8	Keratin-associated protein 2-2;Keratin-associated protein 2-1;Keratin-associated protein 2-4;Keratin-associated protein 2-3	KRTAP2-1;KRTAP2-2;KRTAP2-4;KRTAP2-3	NaN	26.7195	23.5387	30.0295	NaN	24.6855	NaN	NaN	NaN	NaN	NaN	10	10	10	51.6	51.6	51.6	13.054	0	323.31	9964300000	29
600	CON__Q9C075;Q9C075;Q9C075-2;J3QR55;CON__Q99PS0;Q9UFN7;K7EPI0	CON__Q9C075;Q9C075;Q9C075-2	Keratin, type I cytoskeletal 23	KRT23	20.9116	20.9566	18.6143	25.3364	17.5973	20.1326	NaN	17.8013	NaN	15.2593	NaN	19	16	16	55.7	51.4	51.4	48.131	0	261	1565900000	43
601	CON__Q9NSB2;CON__Q6ISB0;Q9NSB2	CON__Q9NSB2;CON__Q6ISB0;Q9NSB2	Keratin, type II cuticular Hb4	KRT84	18.2869	20.4362	17.8699	25.6772	17.082	17.2293	17.9722	NaN	NaN	17.9387	17.3735	34	27	26	64.5	57	55.5	64.895	0	309.47	2207500000	45
602	CON__REFSEQ:XP_986630	CON__REFSEQ:XP_986630			NaN	24.7842	23.7143	26.9988	NaN	23.1449	NaN	NaN	NaN	NaN	NaN	17	3	3	32.4	4.8	4.8	53.728	0	92.88	6139300000	14
603	D3DQH8;P09486;F5GY03;E5RK62	D3DQH8;P09486;F5GY03;E5RK62	SPARC	SPARC	23.6037	22.2088	24.2926	21.5129	24.8636	24.7695	22.5475	22.8411	21.0819	24.1108	22.7627	5	5	5	20.3	20.3	20.3	36.051	0	35.113	2388400000	50
604	H0Y3P2;D3DQV9;P78344-2;P78344;H0YCH5;H0YD77;H0YEC5;E9PKF8;H0YE22;H0YCF8;H0YE44;H0YEN8;H0YDC0;H0YD99	H0Y3P2;D3DQV9;P78344-2;P78344;H0YCH5	Eukaryotic translation initiation factor 4 gamma 2	EIF4G2	21.0207	20.3596	21.3597	20.0509	20.7709	23.1814	21.0355	20.5142	20.0217	20.7383	20.8431	24	24	24	28	28	28	98.117	0	62.956	1572900000	83
605	D3DSM0;A0A087WX36	D3DSM0;A0A087WX36	Integrin beta	ITGB2	19.4125	17.6469	17.3573	19.2286	17.0112	17.4731	19.0262	18.2707	18.8316	18.4107	19.2863	21	1	1	36.8	2.5	2.5	78.354	0	26.634	314830000	18
606	D3DTX6;Q96SB3	D3DTX6;Q96SB3	Neurabin-2	PPP1R9B	19.8768	18.4509	NaN	18.4279	18.2731	NaN	NaN	17.23	NaN	18.2166	NaN	3	3	3	4	4	4	89.333	0	5.6611	95504000	5
607	D3YTB1;F8W727;P62910;D3YTI8	D3YTB1;F8W727;P62910	60S ribosomal protein L32	RPL32	26.4893	27.5782	27.1305	26.8453	27.1462	25.1332	25.5547	27.0584	25.2754	27.2111	26.1649	7	7	7	51.9	51.9	51.9	15.616	0	60.649	8828400000	64
608	D3YTB5;P51617-4;P51617-2;P51617-3;P51617;H7C224;H7C2I6;F8WAB6;H7C3C1;F6U4U2;P51955-3;P51955-2;P51955-4;P51955	D3YTB5;P51617-4;P51617-2;P51617-3;P51617;H7C224	Interleukin-1 receptor-associated kinase 1	IRAK1	17.1045	15.9752	NaN	15.995	NaN	21.0637	NaN	NaN	15.3117	NaN	NaN	7	7	7	14	14	14	76.059	0	36.752	87610000	8
609	D3YTC7;Q9UBM1;Q9UBM1-3;Q9UBM1-2	D3YTC7;Q9UBM1;Q9UBM1-3;Q9UBM1-2	Phosphatidylethanolamine N-methyltransferase	PEMT	NaN	21.309	21.3316	21.1462	21.7488	NaN	NaN	NaN	NaN	NaN	NaN	1	1	1	6.2	6.2	6.2	22.861	0	8.7573	51828000	2
610	E7ENA2;D3YTF8;D3YTF9;Q9NNW7-2;Q9NNW7;A0A096LNN4;Q9NNW7-3;A0A096LPK7;A0A096LPD9;E7EWK1;Q9NNW7-4;A0A096LPH4;A0A096LP96;A0A096LPB7;A0A096LNY7	E7ENA2;D3YTF8;D3YTF9;Q9NNW7-2;Q9NNW7;A0A096LNN4;Q9NNW7-3;A0A096LPK7;A0A096LPD9;E7EWK1;Q9NNW7-4	Thioredoxin reductase 2, mitochondrial	TXNRD2	22.5739	19.6048	21.4535	20.7971	22.7831	19.817	22.6466	22.7317	23.0065	22.2985	22.9073	12	12	12	41.9	41.9	41.9	53.567	0	127.85	1564700000	54
611	D3YTG3;Q7Z7G0;Q5JPC9;E9PPR9;H0YEA0;H7C556;H0Y897;Q7Z7G0-2;Q7Z7G0-3;Q7Z7G0-4	D3YTG3;Q7Z7G0;Q5JPC9	Target of Nesh-SH3	ABI3BP;DKFZp667H216	NaN	NaN	NaN	NaN	NaN	17.709	NaN	NaN	NaN	NaN	NaN	3	3	3	2.7	2.7	2.7	195.32	0	6.2968	20784000	3
612	D6R934;P02746;D6RGJ1	D6R934;P02746	Complement C1q subcomponent subunit B	C1QB	25.4399	24.8506	24.2569	26.0456	22.8597	25.7085	26.2972	23.8419	25.078	25.039	26.0222	9	9	9	45	45	45	26.459	0	134.91	7974800000	133
613	D6R938;E9PBG7;E9PF82;Q13557-8;Q13557-10;Q13557;Q13557-6;Q13557-11;Q13557-12;Q13557-9;Q13557-5;Q13557-3;Q13557-4;H0Y9J2;H0Y9C2;E9PBE8;E7EQE4;D6RHX9;D6RFJ0;E7ERS6;E7ETC9	D6R938;E9PBG7;E9PF82;Q13557-8;Q13557-10;Q13557;Q13557-6;Q13557-11;Q13557-12;Q13557-9;Q13557-5;Q13557-3;Q13557-4	Calcium/calmodulin-dependent protein kinase type II subunit delta	CAMK2D	24.8283	23.0511	23.2386	22.5823	22.9359	24.9085	22.966	23.3741	22.6903	22.7838	23.4601	16	16	10	39.6	39.6	26.7	56.298	0	69.651	4295800000	97
614	D6R955;D6R9U1;H0YJC8;P78337	D6R955;D6R9U1;H0YJC8;P78337	Pituitary homeobox 1	PITX1	NaN	18.5842	NaN	18.6866	NaN	NaN	NaN	NaN	NaN	NaN	NaN	2	1	1	32.5	17.5	17.5	12.445	0.00021697	4.1836	4889400	1
615	D6RDN3;D6RI05;D6RBA5;D6RGY3;D6R960;Q6PUV4	D6RDN3;D6RI05;D6RBA5;D6RGY3;D6R960;Q6PUV4	Complexin-2	CPLX2	NaN	NaN	21.4544	NaN	19.3752	NaN	NaN	NaN	NaN	NaN	NaN	1	1	1	37.8	37.8	37.8	4.1286	0.00062435	3.6017	14214000	1
616	D6R994;Q5U5X0;D6RBV5	D6R994;Q5U5X0;D6RBV5	Complex III assembly factor LYRM7	LYRM7	21.3239	NaN	21.9378	NaN	22.1354	NaN	NaN	20.4014	NaN	NaN	20.8724	2	2	2	41.5	41.5	41.5	6.1932	0	7.1298	43661000	7
617	D6R9J9;E7EM50;D6RFE8;E7EWV1;Q5H8A4-5;Q5H8A4-4;Q5H8A4-2;Q5H8A4;Q5H8A4-6	D6R9J9;E7EM50;D6RFE8;E7EWV1;Q5H8A4-5;Q5H8A4-4;Q5H8A4-2;Q5H8A4;Q5H8A4-6	GPI ethanolamine phosphate transferase 2	PIGG	18.3994	17.5629	20.3231	17.7367	20.0419	NaN	19.7351	NaN	17.4616	NaN	17.3238	2	2	2	15	15	15	20.969	0	4.9175	58832000	4
618	D6R9S7;D6RHE3;D6RDB0;Q96GZ6-6;Q96GZ6-7;Q96GZ6-5;Q96GZ6-9;Q96GZ6-2;Q96GZ6;D6RF72;D6R9M9;D6R9X6;D6RDM3;Q96GZ6-8;Q8IVJ1;Q96JW4	D6R9S7;D6RHE3;D6RDB0;Q96GZ6-6;Q96GZ6-7;Q96GZ6-5;Q96GZ6-9;Q96GZ6-2;Q96GZ6;D6RF72;D6R9M9;D6R9X6	Solute carrier family 41 member 3	SLC41A3	19.0849	20.463	21.1302	20.9224	22.1617	18.9197	18.2096	18.8914	17.971	17.4693	18.3644	3	3	3	27	27	27	16.43	0	6.6125	120690000	11
619	D6R9Z7;P15954	D6R9Z7;P15954	Cytochrome c oxidase subunit 7C, mitochondrial	COX7C	22.2456	22.2599	23.947	22.3962	23.3725	23.1554	22.7581	22.4148	22.7263	22.5055	20.9649	2	2	2	26.8	26.8	26.8	6.3824	0.0084824	2.2464	565980000	9
620	D6RA31;E7EPV7;P37840-2;P37840	D6RA31;E7EPV7;P37840-2;P37840	Alpha-synuclein	SNCA	22.3148	NaN	NaN	NaN	21.9448	22.1005	NaN	21.7112	21.2667	NaN	20.5623	1	1	1	19.4	19.4	19.4	6.8769	0	19.617	127530000	3
621	Q4VXL4;D6RAA5;Q4VXL8;E7EMZ9;E9PBC6;O95359-2;O95359-6;O95359-1;O95359-5;O95359-3;O95359;H0Y9C3;H0Y9Y7;H0Y911;E9PGB3	Q4VXL4;D6RAA5;Q4VXL8;E7EMZ9;E9PBC6;O95359-2;O95359-6;O95359-1;O95359-5;O95359-3;O95359	Transforming acidic coiled-coil-containing protein 2	TACC2	NaN	17.9781	18.4879	NaN	17.634	NaN	17.601	NaN	16.9961	18.8053	18.6533	3	3	3	6.3	6.3	6.3	64.675	0	5.648	90701000	3
622	D6RAN8;Q9P0M9;H7C5U8;D6RE11;B3KN43	D6RAN8;Q9P0M9;H7C5U8	39S ribosomal protein L27, mitochondrial	MRPL27	23.7203	23.1901	23.9096	22.9376	23.7941	21.9252	24.2826	24.1663	24.2123	23.1576	24.3001	5	5	5	64.5	64.5	64.5	10.474	0	35.729	1270900000	21
623	D6RAQ0;D6RIG1;Q08499-11	D6RAQ0;D6RIG1;Q08499-11		PDE4D	NaN	NaN	NaN	21.119	NaN	NaN	NaN	NaN	NaN	NaN	NaN	1	1	1	21.3	21.3	21.3	8.6757	0.0053	2.5377	13665000	1
624	D6RAR4;Q04756	D6RAR4;Q04756	Hepatocyte growth factor activator;Hepatocyte growth factor activator short chain;Hepatocyte growth factor activator long chain	HGFAC	NaN	NaN	NaN	17.8666	NaN	NaN	NaN	NaN	NaN	NaN	NaN	1	1	1	2.9	2.9	2.9	71.482	0.0098576	2.152	6691800	1
625	D6RB01;Q9Y6X4;D6RC41;D6R953	D6RB01;Q9Y6X4	Soluble lamin-associated protein of 75 kDa	FAM169A	19.1823	21.9348	21.9563	20.119	22.4811	19.3941	NaN	NaN	NaN	NaN	NaN	9	9	9	23.8	23.8	23.8	68.054	0	53.28	474290000	23
626	D6RBG8;U3KQ81;D6RFI4;Q99697-3;O75364;Q99697;Q99697-2	D6RBG8;U3KQ81;D6RFI4;Q99697-3;O75364;Q99697;Q99697-2	Pituitary homeobox 2;Pituitary homeobox 3	PITX2;PITX3	22.2966	23.908	21.2996	22.8147	21.1166	NaN	22.5876	23.1593	22.4529	22.2086	20.887	2	2	1	22	22	7.6	14.117	0	17.415	490580000	22
627	D6RBS5;Q8IZ81;D6RHX2;V9GY58	D6RBS5;Q8IZ81;D6RHX2	ELMO domain-containing protein 2	ELMOD2	20.7656	20.6482	22.2585	19.9683	22.6259	NaN	22.8552	22.4772	21.8492	22.0326	22.5142	5	5	5	32.1	32.1	32.1	20.204	0	11.43	548050000	23
628	D6RBW1;P06730;P06730-3;P06730-2;H0Y8J7;D6RFJ3	D6RBW1;P06730;P06730-3;P06730-2;H0Y8J7	Eukaryotic translation initiation factor 4E	EIF4E	20.9829	22.9276	22.2887	21.9144	22.9566	21.6193	21.4573	20.4143	19.4886	21.6968	20.4682	6	6	6	25.3	25.3	25.3	28.512	0	12.381	678310000	18
629	D6RC52;D6RCB9;Q9NX24;H0YC83;J3QSY4	D6RC52;D6RCB9;Q9NX24;H0YC83;J3QSY4	H/ACA ribonucleoprotein complex subunit 2	NHP2	23.9041	24.7459	24.1349	24.043	24.7716	22.5533	22.052	24.0162	21.8203	23.6662	23.4161	4	4	4	53.8	53.8	53.8	15.017	0	68.781	892600000	55
630	D6RCD0;Q8NBQ5	D6RCD0;Q8NBQ5	Estradiol 17-beta-dehydrogenase 11	HSD17B11	24.0899	21.279	24.4917	22.6408	23.9656	24.0906	24.5032	22.5813	22.9694	23.0704	23.3464	10	10	10	43	43	43	28.102	0	130.47	3121500000	90
631	D6RDY5;Q5HYF5;D6RDG2;Q8TEA7-3;Q8TEA7-2;Q8TEA7	D6RDY5;Q5HYF5;D6RDG2;Q8TEA7-3;Q8TEA7-2;Q8TEA7	TBC domain-containing protein kinase-like protein	TBCK;DKFZp313C1916	NaN	NaN	24.9547	NaN	NaN	NaN	NaN	NaN	NaN	NaN	NaN	2	2	2	16.2	16.2	16.2	11.753	0.0081527	2.2917	162590000	2
632	D6REA1;Q9H173;A0RZB6	D6REA1;Q9H173	Nucleotide exchange factor SIL1	SIL1	19.9787	20.0381	21.9502	NaN	23.3148	NaN	17.3946	NaN	18.9149	NaN	20.3122	8	8	8	17.3	17.3	17.3	52.748	0	11.175	389840000	12
633	D6REB4;Q9H074-3;Q9H074-2;Q9H074;D6RJF2;D6RJ02;D6R9H8;D6RD97	D6REB4;Q9H074-3;Q9H074-2;Q9H074;D6RJF2	Polyadenylate-binding protein-interacting protein 1	PAIP1	19.9142	21.3948	20.7505	19.0991	20.3922	NaN	20.7525	20.2187	17.213	20.3828	20.6675	6	6	6	23.1	23.1	23.1	39.908	0	10.934	271900000	25
634	D6REB5;P35475;P35475-2	D6REB5;P35475;P35475-2	Alpha-L-iduronidase	IDUA	17.6283	17.8328	17.9378	19.2827	18.7314	NaN	17.9647	17.3314	18.0226	19.0863	NaN	2	2	2	4.6	4.6	4.6	57.868	0.00041745	3.649	99798000	1
635	D6RGI3;D6RER5;Q9NVA2;Q9NVA2-2;D6RDU5;H0Y961;D6RDP1;D6R9Y6;H0Y9G8	D6RGI3;D6RER5;Q9NVA2;Q9NVA2-2;D6RDU5;H0Y961	Septin-11	2011-09-01	24.8507	23.4372	24.7327	22.6019	24.8027	24.9036	23.4646	23.1371	22.6236	23.5769	23.4202	14	14	6	38.4	38.4	18.1	49.005	0	174.48	5672300000	88
636	D6REX3;O94979-6;O94979-3;O94979-10;O94979-4;O94979-9;O94979-2;O94979;O94979-8;H7BXG7;O94979-7;D6RHZ5;O94979-5;H0YAB3;H0Y8V7;H0Y9K1;H0Y8W8;H0Y9T9;H0YAF5;D6RE64;D6RCQ9;H0Y9V3	D6REX3;O94979-6;O94979-3;O94979-10;O94979-4;O94979-9;O94979-2;O94979;O94979-8;H7BXG7;O94979-7;D6RHZ5;O94979-5	Protein transport protein Sec31A	SEC31A	23.0689	22.4254	24.2387	23.0318	24.2028	21.6391	23.6894	23.0576	22.6954	23.2067	23.7534	26	26	26	27	27	27	136.22	0	288.37	7037700000	193
637	D6RF35;P02774;P02774-3;P02774-2;D6RBJ7;D6RF20;CON__Q3MHN5;CON__ENSEMBL:ENSBTAP00000018229	D6RF35;P02774;P02774-3;P02774-2;D6RBJ7	Vitamin D-binding protein	GC	22.7294	24.8346	23.2073	22.7699	23.3464	22.4346	24.5445	NaN	20.7131	24.461	19.7389	16	16	16	39.1	39.1	39.1	53.02	0	148.65	3684100000	73
638	D6RF48;Q9P2W9;D6RC71;D6RD65;H0YAL4	D6RF48;Q9P2W9	Syntaxin-18	STX18	19.7589	19.3757	18.0685	17.4581	20.0367	16.1077	19.3504	19.5231	16.6975	19.2618	19.4611	3	3	3	9.4	9.4	9.4	35.42	0.00022676	4.8315	168240000	12
639	H0Y9A1;D6RFI3;E7EQR8;Q9GZM5;D6RGY8	H0Y9A1;D6RFI3;E7EQR8;Q9GZM5;D6RGY8	Protein YIPF3;Protein YIPF3, 36 kDa form III	YIPF3	20.7312	20.6021	NaN	20.0829	NaN	18.9786	20.7205	21.4918	20.9829	21.4841	21.501	2	2	2	11.8	11.8	11.8	15.228	0.0053091	2.5515	208230000	5
640	D6RGG3;Q99715;Q99715-4;A0A087X0A8;Q99715-2;H0Y4P7;H0Y5N9;H0Y991	D6RGG3;Q99715;Q99715-4;A0A087X0A8;Q99715-2	Collagen alpha-1(XII) chain	COL12A1	24.4258	24.0463	23.6929	22.2466	23.8615	22.5136	24.5718	24.0132	22.8282	25.0135	24.9321	100	100	100	42.1	42.1	42.1	333.2	0	323.31	36078000000	1029
641	D6RIE3;P14406;D6RGV5;H0UI06;D6R9C3;D6RA35	D6RIE3;P14406;D6RGV5;H0UI06	Cytochrome c oxidase subunit 7A2, mitochondrial	COX7A2	25.2153	24.4006	24.2284	24.3658	24.5263	23.4966	23.3013	21.4101	23.3092	23.1487	19.744	3	3	3	34.1	34.1	34.1	10.264	0	24.282	1054200000	35
642	D6RIY6;Q06265-3;Q06265-4;Q06265;Q06265-2;H0Y9L5;D6R905	D6RIY6;Q06265-3;Q06265-4;Q06265;Q06265-2;H0Y9L5;D6R905	Exosome complex component RRP45	EXOSC9	NaN	19.8717	16.5645	17.2306	17.8551	NaN	NaN	18.104	NaN	17.862	18.2835	2	2	2	5	5	5	46.977	0.0056604	2.5034	38865000	6
643	D6RJ07;Q9UL40-3;Q9UL40;B7Z6B6;B7Z6Q2;B7Z4J8;Q9UL40-2;B7Z4N4	D6RJ07;Q9UL40-3;Q9UL40;B7Z6B6;B7Z6Q2;B7Z4J8;Q9UL40-2	Zinc finger protein 346	ZNF346	NaN	21.3967	19.7681	20.3642	20.6272	NaN	NaN	NaN	NaN	NaN	NaN	3	3	3	11.3	11.3	11.3	34.645	0	6.2165	105970000	1
644	E2QRP0;E5RGU1;O60934	E2QRP0;E5RGU1;O60934	Nibrin	NBN	NaN	21.0205	22.2374	NaN	21.6344	20.0029	NaN	NaN	NaN	NaN	NaN	2	2	2	43.1	43.1	43.1	6.2692	0.0015943	3.116	45511000	3
645	E5RFP0;Q8WVJ2	E5RFP0;Q8WVJ2	NudC domain-containing protein 2	NUDCD2	NaN	21.2215	21.2238	NaN	NaN	25.1897	19.9317	24.1621	19.566	21.0374	19.99	2	2	2	15.2	15.2	15.2	14.745	0	6.4423	406830000	2
646	E5RIY0;E5RFT4;Q8N4L2;E5RJC2;E5RIP9	E5RIY0;E5RFT4;Q8N4L2	Type 2 phosphatidylinositol 4,5-bisphosphate 4-phosphatase	TMEM55A	18.9099	NaN	21.2503	NaN	21.9993	19.7332	17.7155	18.1108	NaN	NaN	NaN	4	4	4	49.4	49.4	49.4	17.745	0	13.347	101920000	11
647	E5RGS4;O60925	E5RGS4;O60925	Prefoldin subunit 1	PFDN1	19.5927	20.0487	21.9892	20.6611	21.4913	20.6638	NaN	NaN	19.0525	20.1495	NaN	3	3	3	24.8	24.8	24.8	13.466	0	6.7181	119850000	6
648	E5RGT2;Q96MH6-2;Q96MH6;Q49A68;H0YC64;E5RJN2;E5RHU1;E5RJI9;H0YAY9;H0YAX4;E5RJ96	E5RGT2;Q96MH6-2;Q96MH6;Q49A68;H0YC64;E5RJN2;E5RHU1;E5RJI9	Transmembrane protein 68	TMEM68	21.1028	21.6565	21.186	22.1791	21.4205	20.8295	21.0496	21.4056	20.5795	20.9573	20.6823	4	4	4	30.1	30.1	30.1	16.126	0	5.7245	261710000	11
649	E5RGY9;E9PDG8;O60641-3;O60641-4;O60641;E5RFU0;E5RHK9;E5RFC6;E5RK51;E5RIJ5	E5RGY9;E9PDG8;O60641-3;O60641-4;O60641;E5RFU0;E5RHK9;E5RFC6;E5RK51;E5RIJ5	Clathrin coat assembly protein AP180	SNAP91	22.1263	NaN	20.2748	19.3114	21.0152	20.9039	22.2295	21.1738	20.9782	NaN	20.6151	4	2	1	7	3.6	2.6	61.035	0	5.0608	464470000	4
650	E5RHT6;E5RHC5;F8W1U7;F8VWH9;Q8N6T3-5;Q8N6T3-3;Q8N6T3;Q8N6T3-2;Q8N6T3-4	E5RHT6;E5RHC5;F8W1U7;F8VWH9;Q8N6T3-5;Q8N6T3-3;Q8N6T3;Q8N6T3-2;Q8N6T3-4	ADP-ribosylation factor GTPase-activating protein 1	ARFGAP1	NaN	18.5642	21.0029	19.9502	20.7916	NaN	19.1352	NaN	NaN	20.1264	18.9389	4	4	4	21.3	21.3	21.3	26.555	0	15.417	120640000	7
651	E5RIW3;E5RJD8;E5RHG6;O75347;E5RIX8;O75347-2	E5RIW3;E5RJD8;E5RHG6;O75347	Tubulin-specific chaperone A	TBCA	18.3762	23.0697	NaN	19.7098	22.7976	21.484	19.6484	NaN	21.6351	20.983	20.0084	3	3	3	42.9	42.9	42.9	10.08	0	14.137	197480000	4
652	E5RHG8;Q15369;Q15369-2;R4GMY8	E5RHG8;Q15369;Q15369-2;R4GMY8	Transcription elongation factor B polypeptide 1	TCEB1	23.3239	23.4284	24.2469	22.8062	24.0322	23.2109	23.5798	21.7704	22.9092	23.0389	21.7211	6	6	6	74.2	74.2	74.2	9.9601	0	31.415	915210000	28
653	E5RHK8;Q9UQ16-2;Q9UQ16-3;Q9UQ16;Q9UQ16-4;Q9UQ16-5;E5RIK2	E5RHK8;Q9UQ16-2;Q9UQ16-3;Q9UQ16;Q9UQ16-4;Q9UQ16-5;E5RIK2	Dynamin-3	DNM3	18.731	NaN	18.7748	NaN	18.2314	17.4638	NaN	NaN	NaN	NaN	NaN	13	3	3	25.7	8.5	8.5	72.889	0	13.615	72038000	6
654	E5RHN5;Q92561	E5RHN5;Q92561	Phytanoyl-CoA hydroxylase-interacting protein	PHYHIP	23.6634	21.3264	20.4419	18.4329	19.3873	23.3736	23.0188	NaN	21.6747	NaN	22.365	4	4	1	12.9	12.9	3.6	28.29	0.00022178	4.4817	844060000	5
655	E5RI99;P62888;E5RJH3	E5RI99;P62888;E5RJH3	60S ribosomal protein L30	RPL30	27.3952	27.2872	26.8769	26.6213	26.5879	25.3545	26.5999	27.1137	26.0933	26.9988	26.6525	6	6	6	61.4	61.4	61.4	12.656	0	323.31	11157000000	137
656	E5RIP4;Q15043-2;Q15043-3;Q15043;E5RFZ8;E5RGA7;E5RJ40;E5RJG5	E5RIP4;Q15043-2;Q15043-3;Q15043;E5RFZ8;E5RGA7;E5RJ40;E5RJG5	Zinc transporter ZIP14	SLC39A14	21.5439	23.2778	21.698	24.4944	21.1812	20.1372	20.9584	20.2076	19.9624	19.3254	20.7221	3	3	3	29	29	29	17	0	22.421	472840000	22
657	E5RJR5;P63208;E7ERH2;F8W8N3;P63208-2;E5RGM3	E5RJR5;P63208;E7ERH2;F8W8N3;P63208-2;E5RGM3	S-phase kinase-associated protein 1	SKP1	25.2294	24.5892	25.0109	23.6706	24.2858	24.5719	23.2774	22.6386	22.5462	23.1167	22.2481	8	8	7	52.8	52.8	35.6	18.72	0	25.476	2442100000	59
658	E5RJZ9;O75525-2;O75525;E5RG12;H0YAQ3;H0YAQ1	E5RJZ9;O75525-2;O75525;E5RG12;H0YAQ3;H0YAQ1	KH domain-containing, RNA-binding, signal transduction-associated protein 3	KHDRBS3	19.8925	19.2395	21.0825	19.9472	19.507	NaN	18.8399	NaN	18.9667	20.2943	20.425	5	4	4	16.6	14.3	14.3	29.48	0	5.2749	151710000	3
659	E5RK69;H0YC77	E5RK69	Annexin	ANXA6	18.6684	18.5634	NaN	19.1291	21.3136	18.674	NaN	NaN	NaN	NaN	NaN	28	1	1	57.2	3	3	51.776	0	32.438	145260000	4
660	E7EM64;Q7L5N1;H7C3T0	E7EM64;Q7L5N1	COP9 signalosome complex subunit 6	COPS6	22.0285	22.0796	24.1871	21.8328	24.1069	22.8016	22.6996	21.7439	21.0336	21.8629	22.102	9	9	9	39	39	39	36.064	0	30.127	1171400000	46
661	E7EM83;Q92932-4;Q92932;Q92932-3;Q92932-2	E7EM83;Q92932-4;Q92932;Q92932-3;Q92932-2	Protein-tyrosine-phosphatase;Receptor-type tyrosine-protein phosphatase N2	PTPRN2	16.7637	17.022	21.0374	NaN	20.4735	16.5699	17.8143	17.9152	17.0301	15.9409	18.4101	7	6	6	11	9.5	9.5	106.99	0	23.067	288050000	14
662	E7EMB1;Q9UH65;E9PJK8;E9PJM7	E7EMB1;Q9UH65	Switch-associated protein 70	SWAP70	17.0448	21.3761	16.9213	17.7084	16.3295	18.2397	17.6619	NaN	17.69	19.1226	17.7203	8	8	8	15.9	15.9	15.9	62.032	0	18.531	232390000	12
663	E7EMC7;Q13501-2;Q13501;E9PFW8;C9JRJ8	E7EMC7;Q13501-2;Q13501;E9PFW8	Sequestosome-1	SQSTM1	19.4714	19.5712	21.7104	19.9439	20.3919	21.3699	19.0653	18.1891	NaN	17.5338	19.1133	4	4	4	15.3	15.3	15.3	41.013	0	37.583	274890000	10
664	E7EMD6;O43572;J3QL61	E7EMD6;O43572	A-kinase anchor protein 10, mitochondrial	AKAP10	NaN	NaN	17.411	NaN	NaN	18.6237	NaN	NaN	NaN	21.6193	19.6016	3	3	3	5.8	5.8	5.8	67.751	0.00041649	3.6079	155230000	3
665	E7EMM4;Q13510;Q13510-2;Q13510-3	E7EMM4;Q13510;Q13510-2;Q13510-3	Acid ceramidase;Acid ceramidase subunit alpha;Acid ceramidase subunit beta	ASAH1	24.104	24.005	25.1131	24.1642	25.602	24.0638	23.7989	23.3902	23.9613	23.2065	22.8261	17	17	17	42.7	42.7	42.7	41.796	0	299.29	9139100000	220
666	E7EMN6;Q6NXS1;P41236;E7EUI7	E7EMN6;Q6NXS1;P41236	Protein phosphatase inhibitor 2-like protein 3;Protein phosphatase inhibitor 2	PPP1R2;PPP1R2P3	19.2661	20.3453	19.8614	19.8381	NaN	NaN	NaN	18.1495	NaN	19.1147	NaN	3	3	3	18.2	18.2	18.2	19.245	0.0056561	2.4902	42398000	2
667	H0Y9K5;E7EMR3;E7ES20;E7ENK1;E7ESV6;E7EUP0;E7EX52;E7EN28;E9PBG4;E7EW95;E7EVD6;E7ETE3;E7EUW2;Q9HAR2-2;Q9HAR2;Q9HAR2-4;Q9HAR2-3	H0Y9K5;E7EMR3;E7ES20;E7ENK1;E7ESV6;E7EUP0;E7EX52;E7EN28;E9PBG4;E7EW95;E7EVD6;E7ETE3;E7EUW2;Q9HAR2-2;Q9HAR2;Q9HAR2-4;Q9HAR2-3	Latrophilin-3	ADGRL3;LPHN3	17.0608	NaN	NaN	NaN	NaN	14.5869	NaN	NaN	NaN	NaN	NaN	2	2	2	2.7	2.7	2.7	102.31	0.00041736	3.6418	6936700	2
668	G3V2V8;J3KMY5;H0YIZ1;G3V3E8;E7EMS2;G3V3D1;P61916-2;P61916	G3V2V8;J3KMY5;H0YIZ1;G3V3E8;E7EMS2;G3V3D1;P61916-2;P61916	Epididymal secretory protein E1	NPC2	22.5287	22.7165	22.7885	23.0989	23.7097	23.2777	23.5962	23.1737	23.904	23.5336	22.3076	4	4	4	45.1	45.1	45.1	13.078	0	26.876	925010000	39
669	E7EMV2;E7ESP9;P07197;P07197-2	E7EMV2;E7ESP9;P07197	Neurofilament medium polypeptide	NEFM	24.3545	17.6628	17.0192	21.6432	17.2205	22.6895	NaN	17.2971	NaN	NaN	17.4328	21	16	16	32.7	27.2	27.2	78.881	0	255.57	2044300000	45
670	E7ENQ1;G3XAA2;G5E948;E7EN19;E7ESS2;O95819-4;O95819-2;O95819;O95819-5;O95819-3;H7C360;E7EX83;C9J840;H7C0P6;E7ETN6;I3L1U1;H7C3Z6	E7ENQ1;G3XAA2;G5E948;E7EN19;E7ESS2;O95819-4;O95819-2;O95819;O95819-5;O95819-3;H7C360;E7EX83;C9J840;H7C0P6	Mitogen-activated protein kinase kinase kinase kinase 4	MAP4K4	19.2455	18.2287	17.0944	18.6909	17.2174	21.8532	18.9049	19.3277	17.8087	19.6674	19.7181	13	13	8	11.9	11.9	7.9	132.16	0	21.991	563630000	18
671	H0Y612;E7EN20;Q9UPN9-2;Q9UPN9	H0Y612;E7EN20;Q9UPN9-2;Q9UPN9	E3 ubiquitin-protein ligase TRIM33	TRIM33	NaN	16.1597	16.9858	16.7002	16.6015	NaN	NaN	NaN	NaN	NaN	NaN	1	1	1	1.5	1.5	1.5	98.891	0.0017868	3.0637	19628000	3
672	E7EN65;P15502-2;P15502-1;P15502-4;G3V0G6;E7ENM0;F8WAH6;P15502-13;P15502-5;P15502-10;P15502;P15502-9;P15502-7;P15502-6;P15502-12;E7ETP7;B3KRT8;E7EQH8;E7EWS8;E7ENW7	E7EN65;P15502-2;P15502-1;P15502-4;G3V0G6;E7ENM0;F8WAH6;P15502-13;P15502-5;P15502-10;P15502;P15502-9;P15502-7;P15502-6;P15502-12;E7ETP7	Elastin	ELN	21.3461	18.919	22.8994	NaN	19.8364	19.3958	NaN	22.7811	21.1611	NaN	19.5024	8	8	2	24.9	24.9	3.9	61.923	0	29.279	383480000	16
673	E7EN73;Q8IZA0-2;Q8IZA0;C9J519;Q8IZA0-3;B1AN15;H0Y4S8	E7EN73;Q8IZA0-2;Q8IZA0;C9J519;Q8IZA0-3;B1AN15	Dyslexia-associated protein KIAA0319-like protein	KIAA0319L	NaN	17.2876	18.9955	NaN	15.7313	17.0414	17.3035	18.8702	18.7051	18.442	18.2675	4	4	4	3.2	3.2	3.2	113.23	0.00021547	4.0801	104480000	7
674	E7END6;P04070;P04070-2;H7BYX9	E7END6;P04070;P04070-2;H7BYX9	Vitamin K-dependent protein C;Vitamin K-dependent protein C light chain;Vitamin K-dependent protein C heavy chain;Activation peptide	PROC	NaN	NaN	NaN	20.254	NaN	NaN	NaN	NaN	NaN	NaN	NaN	3	3	3	6.5	6.5	6.5	55.389	0.0023539	2.9235	26258000	2
675	E7ENL6;P12111-4	E7ENL6;P12111-4	Collagen alpha-3(VI) chain	COL6A3	17.7707	16.3559	18.7129	NaN	18.1201	15.5752	16.9232	17.8368	16.9733	16.0157	14.2394	128	1	0	57.9	0.4	0	278.11	0.0023557	2.9277	333460000	8
676	E7ENV7;Q86YQ8;Q86YQ8-2;Q9HCH3;Q9HCH3-2;Q8IYJ1;A0A087WX62;Q8IYJ1-2	E7ENV7;Q86YQ8;Q86YQ8-2	Copine-8	CPNE8	21.5528	19.9421	17.5108	20.2251	NaN	19.1025	22.1524	20.7562	21.5274	21.6136	20.9712	8	7	7	18.7	17	17	62.233	0	28.755	681730000	30
677	E7EV99;E7ENY0;P35611-2;P35611-6;P35611;P35611-3;P35611-4;H0Y9H2;P35611-5;D6RF25;D6RJE2;H0YFD8;H0YG19;D6RAH3	E7EV99;E7ENY0;P35611-2;P35611-6;P35611;P35611-3;P35611-4;H0Y9H2;P35611-5	Alpha-adducin	ADD1	24.4248	23.4025	23.3692	22.6726	23.8647	23.5384	22.1988	22.844	22.1057	21.7999	22.8489	19	19	18	38	38	36.7	70.055	0	167.14	3736900000	91
678	E7EW77;E7EP65;F8WAL6;Q9NYB9-2;Q9NYB9-4;Q9NYB9;E9PEZ7;Q9NYB9-3;H0Y6B5;F8WBL5;F8WAQ3;F8WEB9;H7C3Q7	E7EW77;E7EP65;F8WAL6;Q9NYB9-2;Q9NYB9-4;Q9NYB9;E9PEZ7;Q9NYB9-3	Abl interactor 2	ABI2	NaN	NaN	17.8075	NaN	19.2287	NaN	NaN	NaN	NaN	NaN	NaN	5	2	2	14.6	7.3	7.3	52.789	0.00022502	4.7082	17719000	2
679	E7EPB3;P50914	E7EPB3;P50914	60S ribosomal protein L14	RPL14	26.4773	26.5167	26.2625	27.0073	26.4737	25.0721	25.8535	26.765	25.5812	26.1042	26.4287	8	8	8	52.4	52.4	52.4	14.558	0	32.944	10330000000	134
680	E7EPG1;Q13201;Q13201-2	E7EPG1;Q13201	Multimerin-1;Platelet glycoprotein Ia*;155 kDa platelet multimerin	MMRN1	18.2148	NaN	16.6439	14.4895	20.2734	17.9302	NaN	18.1285	17.6369	NaN	15.1609	8	8	8	10.2	10.2	10.2	110.75	0	23.114	213220000	11
681	E7EPG3;Q99712;C9J0W5;F8VW46;C9JTX1;F8VX74;A8MTZ5;E7EWV2;A8MVK1	E7EPG3;Q99712	ATP-sensitive inward rectifier potassium channel 15	KCNJ15	19.0453	19.1429	NaN	18.8509	NaN	NaN	21.1512	20.5916	19.8049	21.9328	21.0576	3	3	3	13.1	13.1	13.1	27.315	0	5.3618	138640000	4
682	E7EWP2;E7EPJ7;O75962-5;O75962-2;O75962-4;O75962;A0A087X139;F5H228	E7EWP2;E7EPJ7;O75962-5;O75962-2;O75962-4;O75962;A0A087X139;F5H228	Triple functional domain protein	TRIO	NaN	NaN	14.8278	NaN	14.6652	NaN	NaN	NaN	NaN	NaN	NaN	2	2	2	1	1	1	262.68	0.007635	2.3497	8314700	3
683	E7EPM6;P33121-2;P33121;P33121-3;B7Z3Z9;D6RER0;H0Y9Z9;H0Y9U7;D6RG07	E7EPM6;P33121-2;P33121;P33121-3;B7Z3Z9;D6RER0	Long-chain-fatty-acid--CoA ligase 1	ACSL1	22.7323	20.8873	22.3514	22.5943	22.1617	22.081	22.1967	22.298	22.8586	21.7072	22.3343	19	19	17	37.5	37.5	34.6	74.281	0	57.796	2780000000	105
684	E7EPT4;P19404	E7EPT4;P19404	NADH dehydrogenase [ubiquinone] flavoprotein 2, mitochondrial	NDUFV2	24.6574	23.6095	24.3533	23.5991	24.4384	23.2103	24.0045	24.4954	24.4108	23.9881	23.3303	10	10	10	49.2	49.2	49.2	27.907	0	47.669	3190900000	144
685	E7EPZ9;P22105-3;A0A087X0I0;P22105-2;Q16473;C9J7W4;REV__Q96CG3	E7EPZ9;P22105-3	Tenascin-X	TNXB	22.3406	16.9403	23.4134	15.5182	22.6121	22.9566	20.1372	23.6821	24.3292	17.7086	22.3117	106	106	3	35.6	35.6	1.3	458.38	0	323.31	20502000000	480
686	I3L4Z6;E7EQ34;O14653;O14653-2;I3L1K7;I3L3V4;O14653-3;I3L0K1;I3NI02	I3L4Z6;E7EQ34;O14653;O14653-2;I3L1K7;I3L3V4;O14653-3;I3L0K1	Golgi SNAP receptor complex member 2	GOSR2	19.2321	20.8436	23.9621	22.1351	23.6247	20.5305	21.4498	20.3392	20.9831	21.0023	20.5972	4	4	4	34.5	34.5	34.5	19.496	0	13.294	516030000	21
687	E7EQB2;E7ER44;P02788;P02788-2;C9JCF5	E7EQB2;E7ER44;P02788;P02788-2	Lactotransferrin;Lactoferricin-H;Kaliocin-1;Lactoferroxin-A;Lactoferroxin-B;Lactoferroxin-C	LTF	25.9308	22.3801	25.9019	21.2835	24.2615	24.8453	26.218	25.2748	25.6974	23.4301	25.4678	38	38	36	66.5	66.5	63.5	76.625	0	323.31	23536000000	564
688	E9PCM6;E7EQN5;P98171;P98171-2;F8WAR0;C9JLA8;C9J5M2;S4R352;H7C2Z8;S4R314	E9PCM6;E7EQN5;P98171;P98171-2;F8WAR0	Rho GTPase-activating protein 4	ARHGAP4	13.919	NaN	NaN	NaN	NaN	19.1702	15.5783	13.7886	15.7394	14.4678	NaN	4	4	4	5.6	5.6	5.6	85.38	0	7.245	53079000	5
689	E7EQR4;P15311	E7EQR4;P15311	Ezrin	EZR	25.0863	25.3374	23.8904	25.0755	24.1092	23.9917	25.0071	24.2523	25.3905	24.4608	23.713	32	21	19	41.6	30.9	29.5	69.371	0	207.29	12025000000	183
690	E9PES6;E7ES08;E7EQU1;O15347	E9PES6;E7ES08;E7EQU1;O15347	High mobility group protein B3	HMGB3	20.2059	23.1574	NaN	22.7333	20.5074	18.7208	NaN	NaN	19.1714	22.4644	21.8434	3	3	3	26.1	26.1	26.1	17.522	0	7.1356	293830000	8
691	E7ER68;Q658Y4;G3V120	E7ER68;Q658Y4	Protein FAM91A1	FAM91A1	17.6763	17.4566	19.3049	16.3555	19.3626	16.6908	17.6501	17.9139	16.7145	17.6073	NaN	5	5	5	8.2	8.2	8.2	88.986	0	9.7651	125260000	13
692	E7ERD7;Q9UKU0-2;Q9UKU0-5;Q9UKU0-3;Q9UKU0;Q9UKU0-9;Q9UKU0-6;Q9UKU0-8;Q9UKU0-1;C9J8C7;Q9UKU0-7;C9JT10;C9JPA5;C9J4I1;C9JK59;C9J3Z0	E7ERD7;Q9UKU0-2;Q9UKU0-5;Q9UKU0-3;Q9UKU0;Q9UKU0-9;Q9UKU0-6;Q9UKU0-8;Q9UKU0-1;C9J8C7;Q9UKU0-7	Long-chain-fatty-acid--CoA ligase 6	ACSL6	19.2947	NaN	18.3432	14.6582	19.3935	19.3059	NaN	15.8335	NaN	16.9077	15.2992	6	6	5	12.1	12.1	10.8	75.246	0	10.22	112080000	10
693	E7ERW8;H9KV28;E9PHQ0;E9PEZ3;O60610-2;O60610-3;O60610;E7EMV0;E5RJ79;B4E2I7	E7ERW8;H9KV28;E9PHQ0;E9PEZ3;O60610-2;O60610-3;O60610;E7EMV0	Protein diaphanous homolog 1	DIAPH1	20.5306	23.541	20.6006	19.0134	23.4376	23.2689	23.5268	23.147	23.0189	23.268	19.0347	11	11	11	10.7	10.7	10.7	135.35	0	18.673	5732400000	26
694	E7ES19;P35443;G3XAP6;CON__ENSEMBL:ENSBTAP00000006074;P49747-2;P49747	E7ES19;P35443	Thrombospondin-4	THBS4	18.3595	18.5863	21.0211	18.3382	21.7466	17.1304	NaN	NaN	NaN	NaN	NaN	6	6	5	9.8	9.8	8.3	96.005	0	21.275	260360000	11
695	H0YBP1;E7ESA6;Q05397-2;Q8IYN9;Q05397;Q05397-5;Q05397-3;E9PEI4;H0YB16;H0YBZ1;Q05397-4;H0YB99;E5RJQ2;E5RG80;B4DWJ1;E9PBI4;Q05397-6;Q14289-2;Q14289	H0YBP1;E7ESA6;Q05397-2;Q8IYN9;Q05397;Q05397-5;Q05397-3;E9PEI4;H0YB16;H0YBZ1;Q05397-4	Focal adhesion kinase 1	PTK2	16.0239	18.2159	16.9471	18.0276	18.128	15.6401	18.2137	16.7369	NaN	16.5959	18.0735	5	5	5	4.8	4.8	4.8	115.45	0	6.7856	132320000	6
696	E7ESI2;G3V5T9;P24941-2;P24941	E7ESI2;G3V5T9;P24941-2;P24941	Cyclin-dependent kinase 2	CDK2	NaN	NaN	NaN	NaN	NaN	20.7963	NaN	NaN	NaN	NaN	NaN	3	2	2	13	9.7	9.7	27.164	0.00022361	4.57	30958000	2
697	E7ESK6;E9PBI9;P34741;E5RJB8;E5RHU3	E7ESK6;E9PBI9;P34741;E5RJB8;E5RHU3	Syndecan;Syndecan-2	SDC2	19.2186	NaN	19.1467	NaN	21.4023	NaN	NaN	20.5983	18.0592	NaN	NaN	2	2	2	15.2	15.2	15.2	18.388	0	8.0243	81248000	5
698	E7ESL0;J3KQY1;Q9NWU5;Q9NWU5-2;Q9NWU5-3	E7ESL0;J3KQY1;Q9NWU5;Q9NWU5-2;Q9NWU5-3	39S ribosomal protein L22, mitochondrial	MRPL22	22.3904	20.2438	21.6398	21.349	21.7884	19.2577	22.0809	22.105	22.5884	21.7302	22.2788	4	4	4	18.4	18.4	18.4	24.325	0	7.2625	643650000	18
699	E7ESP4;E7EMF1;E9PB77;D6RG08	E7ESP4;E7EMF1;E9PB77		ITGA2	20.7456	21.935	NaN	20.9179	NaN	19.9694	21.0021	21.3512	20.407	21.4396	21.2368	24	1	1	33.9	2.1	2.1	102.83	0	53.575	840290000	25
700	E7ESX1;Q9H2X0-5;Q9H2X0	E7ESX1;Q9H2X0-5;Q9H2X0	Chordin	CHRD	NaN	17.5384	15.4173	NaN	NaN	14.4907	NaN	NaN	NaN	NaN	NaN	2	2	2	3.1	3.1	3.1	101.96	0.00042571	3.915	11572000	2
701	E7ET49;Q8NCG7-2;Q8NCG7-4;Q8NCG7	E7ET49;Q8NCG7-2;Q8NCG7-4;Q8NCG7	Sn1-specific diacylglycerol lipase beta	DAGLB	18.9998	17.3427	15.997	18.6478	16.5602	14.6529	18.6265	17.71	18.2475	17.7223	19.0602	3	3	3	5.5	5.5	5.5	68.951	0	5.794	107030000	19
702	E7ETB3;Q9ULA0;E7EMB6;B9ZVU2;F8WAN0;C9JBE1;E7EPX3;E5RJ35;C9JRG3;C9J1E2	E7ETB3;Q9ULA0;E7EMB6	Aspartyl aminopeptidase	DNPEP	22.2533	24.3402	23.5854	23.6654	22.8162	22.7939	22.2911	21.1118	21.8935	21.966	21.6105	13	13	13	34.1	34.1	34.1	54.502	0	48.47	2214200000	46
703	G3XAM2;E7ETH0;P05156;A0A087X0I2	G3XAM2;E7ETH0;P05156	Complement factor I;Complement factor I heavy chain;Complement factor I light chain	CFI	17.4483	17.7571	17.5563	16.0958	16.5933	16.9077	19.4429	16.5142	17.5976	19.3912	NaN	3	3	3	6.8	6.8	6.8	65.059	0	7.7488	95356000	6
704	E7ETU5;F6Y5H0;P29558-2;P29558;E7EPF2	E7ETU5;F6Y5H0;P29558-2;P29558;E7EPF2	RNA-binding motif, single-stranded-interacting protein 1	RBMS1	19.0236	20.9857	20.2183	20.6641	20.2143	NaN	19.0728	19.1289	18.2101	19.3571	20.3173	2	2	1	8.1	8.1	4.1	40.147	0	9.9483	168890000	7
705	H0Y9G6;E7ETU7;P09001;E9PF06;D6RC14;D6RBQ5	H0Y9G6;E7ETU7;P09001;E9PF06	39S ribosomal protein L3, mitochondrial	MRPL3	21.8395	20.9195	21.991	19.8025	21.8397	19.1747	21.3576	21.1667	20.9922	20.7982	22.3561	5	5	5	18.5	18.5	18.5	40.47	0	16.639	741560000	30
706	E7ETU9;O00469;O00469-2;O00469-3;C9JXZ0	E7ETU9;O00469;O00469-2;O00469-3	Procollagen-lysine,2-oxoglutarate 5-dioxygenase 2	PLOD2	18.7119	NaN	NaN	20.9299	NaN	17.2692	NaN	15.0205	NaN	17.342	NaN	7	7	7	11.7	11.7	11.7	81.169	0	11.141	111380000	7
707	E7ETY2;Q13428-8;Q13428-7;Q13428-3;J3KQ96;Q13428-2;Q13428-6;Q13428;Q13428-4;Q13428-5;H0YA99	E7ETY2;Q13428-8;Q13428-7;Q13428-3;J3KQ96;Q13428-2;Q13428-6;Q13428;Q13428-4	Treacle protein	TCOF1	15.1755	19.3249	19.568	16.152	19.2488	17.0157	NaN	NaN	NaN	NaN	16.4676	9	9	9	8.3	8.3	8.3	152.3	0	25.399	198360000	14
708	E7ETY4;E9PC69;Q7KZI7-10;Q7KZI7-13;Q7KZI7-7;Q7KZI7-2;Q7KZI7-15;Q7KZI7-5;Q7KZI7-16;Q7KZI7-4;Q7KZI7-9;Q7KZI7-12;Q7KZI7-14;Q7KZI7-3;Q7KZI7-6;Q7KZI7-11;Q7KZI7-8;Q7KZI7;F5H4F6;F5H6N2;H0YNV4	E7ETY4;E9PC69;Q7KZI7-10;Q7KZI7-13;Q7KZI7-7;Q7KZI7-2;Q7KZI7-15;Q7KZI7-5;Q7KZI7-16;Q7KZI7-4;Q7KZI7-9;Q7KZI7-12;Q7KZI7-14;Q7KZI7-3;Q7KZI7-6;Q7KZI7-11;Q7KZI7-8;Q7KZI7;F5H4F6	Serine/threonine-protein kinase MARK2	MARK2	NaN	17.2365	18.5533	NaN	18.9954	17.0602	17.2044	17.6471	17.1642	NaN	17.6178	3	3	2	5.4	5.4	3.7	78.452	0	6.6706	79912000	2
709	E9PLT1;E7EU05;P16671;P16671-4;P16671-3;P16671-2;E7EX47	E9PLT1;E7EU05;P16671;P16671-4;P16671-3;P16671-2	Platelet glycoprotein 4	CD36	16.2857	NaN	NaN	19.1208	19.9798	19.8268	19.4536	17.1941	NaN	19.3452	18.5616	6	6	6	24.5	24.5	24.5	44.732	0	32.334	276700000	14
710	E7EU13;Q96P48-5;Q96P48-7;Q96P48-2;Q96P48-4;Q96P48-1;Q96P48-3;Q96P48;F5GWQ2;F5GWN4;F8WBT0	E7EU13;Q96P48-5;Q96P48-7;Q96P48-2;Q96P48-4;Q96P48-1;Q96P48-3;Q96P48;F5GWQ2;F5GWN4;F8WBT0	Arf-GAP with Rho-GAP domain, ANK repeat and PH domain-containing protein 1	ARAP1	17.1391	15.028	15.9333	NaN	15.696	18.0247	16.7462	NaN	15.5742	15.8448	NaN	2	2	2	2.3	2.3	2.3	134.64	0.0012318	3.4442	50548000	4
711	E7EU96;Q5U5J2;P68400;Q8NEV1;P68400-2;V9GYA2;V9GY80;A0A087WY74;V9GYW6;REV__E7EP72	E7EU96;Q5U5J2;P68400;Q8NEV1;P68400-2	Casein kinase II subunit alpha;Casein kinase II subunit alpha 3	CSNK2A1;CSNK2A3	24.3707	23.7102	23.9361	23.1001	24.0934	22.9767	23.691	23.9223	23.3253	23.472	23.7477	16	15	15	51.7	50.1	50.1	45.31	0	115.54	3661100000	87
712	E7EUF1;Q13822;Q13822-3;Q13822-2;E5RIA2;E5RJ49;E5RIB9;A0A087WT58;F8VUA0;A6NES4	E7EUF1;Q13822;Q13822-3;Q13822-2;E5RIA2	Ectonucleotide pyrophosphatase/phosphodiesterase family member 2	ENPP2	NaN	15.2961	18.4856	NaN	21.8858	NaN	NaN	NaN	NaN	NaN	NaN	14	14	14	18.8	18.8	18.8	101.55	0	30.288	226960000	17
713	E7EUP3;O95251-3;O95251-5;O95251-2;O95251-4;O95251	E7EUP3;O95251-3;O95251-5;O95251-2;O95251-4;O95251	Histone acetyltransferase;Histone acetyltransferase KAT7	KAT7	NaN	18.722	19.5218	18.7127	19.1994	NaN	NaN	NaN	NaN	NaN	NaN	3	3	3	8.9	8.9	8.9	49.859	0.0010294	3.4705	65642000	3
714	E7EX73;E9PGM1;E7EUU4;Q04637-6;Q04637-7;Q04637-5;Q04637-4;Q04637-3;Q04637;Q04637-8;Q04637-9;C9JF13;C9J6B6;C9K073;C9J2Z7;H7C044;H7C0V6;REV__Q8NEG2-2;REV__F5H7J8;REV__Q8NEG2;REV__C9JQZ6;REV__J3KQX6	E7EX73;E9PGM1;E7EUU4;Q04637-6;Q04637-7;Q04637-5;Q04637-4;Q04637-3;Q04637;Q04637-8;Q04637-9;C9JF13	Eukaryotic translation initiation factor 4 gamma 1	EIF4G1	21.4762	22.0097	22.1799	21.5616	22.4672	20.2999	21.5516	21.1973	20.6698	21.8275	21.6262	29	29	24	23.3	23.3	19.8	158.64	0	96.855	2961400000	113
715	E7EVA0;P27816-6;P27816;P27816-2;P27816-5;P27816-4;H7C4C5;B5MEG9;H0Y2V1;F8W9U4;H7C456	E7EVA0;P27816-6;P27816;P27816-2	Microtubule-associated protein;Microtubule-associated protein 4	MAP4	23.121	22.7285	23.2703	23.0221	23.5217	21.8654	22.2427	21.9578	21.6139	21.3961	22.0882	25	25	25	15.3	15.3	15.3	245.44	0	85.81	10202000000	116
716	E9PEY4;E7EVB6;O60941-6;O60941-7;O60941;O60941-5;O60941-2;O60941-4;O60941-3	E9PEY4;E7EVB6;O60941-6;O60941-7;O60941;O60941-5;O60941-2;O60941-4;O60941-3	Dystrobrevin;Dystrobrevin beta	DTNB	18.3565	19.1481	17.277	19.1475	18.2862	17.5137	NaN	19.186	17.5674	17.226	NaN	7	2	2	15.1	4.4	4.4	67.054	0	8.4895	121170000	7
717	H0Y5B5;E7EVG2;Q86U86-6;Q86U86-5;Q86U86-4;Q86U86-7;Q86U86-3;Q86U86-9;Q86U86-2;Q86U86-8;Q86U86;C9JQF1;C9JPI5;C9JCJ2;C9J053	H0Y5B5;E7EVG2;Q86U86-6;Q86U86-5;Q86U86-4;Q86U86-7;Q86U86-3;Q86U86-9;Q86U86-2;Q86U86-8;Q86U86	Protein polybromo-1	PBRM1	17.939	18.1307	17.8052	16.5458	18.0538	15.5984	15.0883	17.0759	NaN	15.5419	16.2042	5	5	5	4.4	4.4	4.4	126.29	0	7.0925	108110000	8
718	G5E9S8;G3V2E7;F8W6L3;G3V3H3;G3V5R9;E7EVH7;Q07866-8;Q07866-2;Q07866-3;Q07866;Q07866-7;Q07866-5;Q07866-10;Q07866-6;Q07866-4;Q07866-9;G3V2P7;H0YJU9;H0YJL0;H0YJT3;H0YG16;H0YGB8	G5E9S8;G3V2E7;F8W6L3;G3V3H3;G3V5R9;E7EVH7;Q07866-8;Q07866-2;Q07866-3;Q07866;Q07866-7;Q07866-5;Q07866-10;Q07866-6;Q07866-4;Q07866-9	Kinesin light chain 1	KLC1	20.7569	19.4591	22.5943	19.6606	22.0953	20.1493	20.5415	18.6658	19.7508	20.1333	17.922	15	15	10	31.3	31.3	20.6	62.506	0	34.869	787000000	30
719	E7EVJ5;Q96F07-2;Q96F07;H7C229;E7EW33;A0A087WWZ1;A0A087WTQ3;A0A087WVE1;A0A087WZL7	E7EVJ5;Q96F07-2;Q96F07;H7C229;E7EW33	Cytoplasmic FMR1-interacting protein 2	CYFIP2	19.3675	18.0541	18.1767	17.3513	19.04	19.3434	17.6622	17.8462	NaN	17.1545	17.7959	24	7	7	22.7	7	7	142.58	0	18.052	288860000	31
720	E7EVQ6;Q14534	E7EVQ6;Q14534	Squalene monooxygenase	SQLE	NaN	NaN	NaN	NaN	16.7655	NaN	16.0936	NaN	NaN	NaN	NaN	1	1	1	3.3	3.3	3.3	53.067	0.0081406	2.2836	5077600	1
721	E7EVW7;P14317;P14317-2	E7EVW7;P14317;P14317-2	Hematopoietic lineage cell-specific protein	HCLS1	22.7926	20.5939	22.3422	21.6424	22.1941	21.2846	22.3581	20.3541	21.4878	21.4454	22.0731	6	6	6	19.2	19.2	19.2	49.704	0	21.947	979510000	31
722	E7EVX8;Q8WWY3;E7EU94;E7ESX0;E7EN72;Q8WWY3-2;E7ESA8;Q8WWY3-3	E7EVX8;Q8WWY3;E7EU94;E7ESX0;E7EN72;Q8WWY3-2;E7ESA8;Q8WWY3-3	U4/U6 small nuclear ribonucleoprotein Prp31	PRPF31	16.9784	20.5443	21.8889	19.2912	21.5839	19.6969	18.1041	16.9521	NaN	17.0492	16.3141	5	5	5	16	16	16	54.766	0	23.8	248450000	15
723	E7EVY2;Q96AG3-2;Q96AG3;B7Z6C8;Q96AG3-3	E7EVY2;Q96AG3-2;Q96AG3;B7Z6C8;Q96AG3-3	Solute carrier family 25 member 46	SLC25A46	21.8915	18.7918	21.3072	21.0731	21.9867	19.4783	20.0829	20.7023	19.7973	21.1786	21.0598	3	3	3	16.4	16.4	16.4	28.57	0	5.1077	303670000	11
724	E7EVZ5;Q8NBM8	E7EVZ5;Q8NBM8	Prenylcysteine oxidase-like	PCYOX1L	21.6621	22.3668	22.7115	21.8878	22.5649	20.9403	20.2044	19.3259	20.3514	20.771	18.583	4	4	4	13.4	13.4	13.4	45.679	0	63.612	436340000	22
725	E7EWK3;Q9H2U1-3;Q9H2U1-2;Q9H2U1;H7C5F5	E7EWK3;Q9H2U1-3;Q9H2U1-2;Q9H2U1	ATP-dependent RNA helicase DHX36	DHX36	NaN	17.9433	18.3824	NaN	18.8822	17.7694	16.8347	15.6462	15.4131	16.3709	17.3113	3	3	3	4.3	4.3	4.3	91.43	0	7.1203	81847000	4
726	E7EWM1	E7EWM1		NCOA2	20.7339	19.4261	19.4082	19.9978	19.4137	19.8592	20.2568	19.6667	19.7032	20.1653	19.8822	1	1	1	1.3	1.3	1.3	102.73	0.0083056	2.2567	604560000	3
727	E9PID8;E7EWR4;P33240-2;P33240	E9PID8;E7EWR4;P33240-2;P33240	Cleavage stimulation factor subunit 2	CSTF2	18.4256	19.7259	20.964	18.0158	21.7369	NaN	NaN	NaN	15.9846	NaN	NaN	3	3	2	10.7	10.7	7.3	46.665	0	7.3676	155970000	5
728	E7EX17;P23588;F8VX11;B4DS13;F8W0K0;F8VRU1;F8VYE9;F8VSC7;F8VP89	E7EX17;P23588;F8VX11;B4DS13;F8W0K0;F8VRU1;F8VYE9;F8VSC7;F8VP89	Eukaryotic translation initiation factor 4B	EIF4B	19.9213	21.8558	21.411	19.5925	21.3017	16.7894	20.1357	19.729	19.8611	21.5148	21.1495	4	4	4	7.3	7.3	7.3	69.697	0	15.41	738430000	16
729	E7EX90;Q14203-3;Q14203-4;Q14203-5;Q6AWB1;E7EWF7;C9JZA4;C9JTE5;C9JJN7;C9JJD0;C9JKG6;E9PCY0;REV__H0Y8C5;REV__Q5VTR2	E7EX90;Q14203-3;Q14203-4;Q14203-5;Q6AWB1	Dynactin subunit 1	DCTN1;DKFZp686E0752	17.4701	16.8826	16.7573	16.7912	17.6989	16.1184	16.135	16.0684	15.4801	16.5644	15.6819	32	1	1	35.4	2.7	2.7	139.09	0.00042635	3.9354	84579000	9
730	F8VZJ2;F8W0W4;H0YHX9;Q13765;E9PAV3-2;E9PAV3;F8W1N5;F8VNW4;F8VZ58;Q9BZK3	F8VZJ2;F8W0W4;H0YHX9;Q13765;E9PAV3-2;E9PAV3;F8W1N5;F8VNW4	Nascent polypeptide-associated complex subunit alpha;Nascent polypeptide-associated complex subunit alpha, muscle-specific form	NACA	23.3369	25.0655	24.706	24.4118	24.416	23.1323	24.4052	23.1017	22.7368	24.7057	23.9444	4	4	4	40.4	40.4	40.4	15.016	0	45.955	1435400000	66
731	E9PB61;Q86V81	E9PB61;Q86V81	THO complex subunit 4	ALYREF	21.6721	23.5584	24.2081	23.461	24.172	20.4113	22.5405	22.2382	21.0947	22.1768	22.4948	5	5	5	24.2	24.2	24.2	27.557	0	42.252	1533100000	42
732	E9PBC5;H0YAC1;P03952;C9IYG8;C9JCT1;C9J075	E9PBC5;H0YAC1;P03952;C9IYG8;C9JCT1;C9J075	Plasma kallikrein;Plasma kallikrein heavy chain;Plasma kallikrein light chain	KLKB1	NaN	16.9745	16.7383	NaN	15.5311	NaN	18.3752	NaN	NaN	17.9278	NaN	2	2	2	5.6	5.6	5.6	61.838	0.00022696	4.8382	32368000	2
733	E9PBE3;Q8N3I7-2;Q8N3I7;F8WBR7	E9PBE3;Q8N3I7-2;Q8N3I7	Bardet-Biedl syndrome 5 protein	BBS5	19.1693	18.7476	20.3389	NaN	19.8318	20.6724	NaN	NaN	NaN	NaN	NaN	6	6	6	9.9	9.9	9.9	60.976	0	8.3796	177300000	7
734	E9PC52;Q16576;Q16576-2;Q5JP01	E9PC52;Q16576;Q16576-2;Q5JP01	Histone-binding protein RBBP7	RBBP7	NaN	22.5851	22.0082	20.461	22.3036	NaN	20.2547	NaN	18.9067	18.2406	NaN	5	2	2	10.6	6.7	6.7	46.938	0	5.9215	326100000	9
735	V9GYD9;Q5VZZ6;E9PC62;O95319-5;O95319-2;O95319;O95319-4;O95319-3;V9GY47	V9GYD9;Q5VZZ6;E9PC62;O95319-5;O95319-2;O95319;O95319-4;O95319-3	CUGBP Elav-like family member 2	CELF2	19.2374	21.5869	20.876	21.1277	21.1471	20.6388	20.1145	18.7636	16.794	NaN	20.2167	5	5	5	14.3	14.3	14.3	46.621	0	41.541	353640000	18
736	E9PCB6;Q9BYT8;H0YAK4;H0YAF7	E9PCB6;Q9BYT8;H0YAK4	Neurolysin, mitochondrial	NLN	19.0444	21.5257	18.2933	19.7312	NaN	18.39	NaN	16.9346	NaN	16.1621	20.3469	4	4	4	7.5	7.5	7.5	68.867	0	5.4039	336250000	6
737	H0YA68;E9PCD7;Q9Y2E5-2;Q9Y2E5	H0YA68;E9PCD7;Q9Y2E5-2;Q9Y2E5	Alpha-mannosidase;Epididymis-specific alpha-mannosidase	MAN2B2	NaN	NaN	NaN	NaN	17.338	NaN	NaN	NaN	NaN	NaN	NaN	3	3	3	4.2	4.2	4.2	107.51	0.00022619	4.7815	6461300	3
738	E9PCG9;Q02338;C9K0G7;H7C2W1;C9JM78;C9JQ90	E9PCG9;Q02338;C9K0G7	D-beta-hydroxybutyrate dehydrogenase, mitochondrial	BDH1	23.7729	22.7463	22.6357	23.5955	23.3259	20.4646	22.5356	22.7208	23.8397	20.8266	22.3598	12	12	12	62.5	62.5	62.5	29.012	0	30.777	1425900000	59
739	E9PCP0;P16520-2;P16520;F5H8J8;F5H100;F5H0S8	E9PCP0;P16520-2;P16520;F5H8J8;F5H100;F5H0S8	Guanine nucleotide-binding protein G(I)/G(S)/G(T) subunit beta-3	GNB3	NaN	NaN	23.0445	NaN	22.5379	NaN	NaN	NaN	NaN	NaN	NaN	6	4	4	18.3	13.3	13.3	37.118	0	36.241	206370000	7
740	E9PCT3;P51636-2;P51636	E9PCT3;P51636-2;P51636	Caveolin;Caveolin-2	CAV2	20.6121	20.8882	18.6746	21.2794	19.4033	21.7885	20.4846	20.5779	19.781	20.445	20.9958	1	1	1	15.9	15.9	15.9	12.953	0	6.9185	135460000	4
741	K7EJC8;E9PCW1;O95249;B4DQA8;G5E9T8;A0A087WYX5;O95249-2;F6RU00;Q96QI9	K7EJC8;E9PCW1;O95249;B4DQA8;G5E9T8;A0A087WYX5;O95249-2	Golgi SNAP receptor complex member 1	GOSR1	19.0578	19.5815	21.4204	19.347	20.8578	18.6799	NaN	19.9321	18.7074	19.3764	20.6962	4	4	4	15.3	15.3	15.3	26.989	0	5.8198	207710000	9
742	E9PCX7;H0Y8P5;D6RCR6	E9PCX7		NNT	17.9379	17.7263	18.7785	18.2227	18.0838	NaN	18.9307	18.729	19.219	18.1052	19.0833	32	1	1	38.6	1.5	1.5	99.728	0.00022114	4.4331	181630000	7
743	V9GYW9;E9PD55;E9PDJ2;P53805-3;P53805-2;P53805	V9GYW9;E9PD55;E9PDJ2;P53805-3;P53805-2;P53805	Calcipressin-1	RCAN1	NaN	NaN	NaN	NaN	NaN	21.9688	NaN	NaN	NaN	NaN	NaN	3	3	3	13.2	13.2	13.2	23.224	0.00022686	4.8328	45149000	2
744	E9PD68;Q14194;Q14194-2	E9PD68;Q14194;Q14194-2	Dihydropyrimidinase-related protein 1	CRMP1	22.6121	NaN	24.4646	18.288	24.2484	22.6569	NaN	17.0491	16.4637	NaN	NaN	22	18	18	57.7	50	50	62.029	0	168.77	2010300000	87
745	E9PDE8;O95757;D6RJ96	E9PDE8;O95757;D6RJ96	Heat shock 70 kDa protein 4L	HSPA4L	19.5028	18.4663	20.6454	16.435	19.859	18.737	17.4153	18.0966	19.6415	19.7767	NaN	14	12	12	24.1	20.4	20.4	91.953	0	25.424	394130000	20
746	E9PDF6;O43795-2;O43795;H7C2Y7;E7EQD9;C9JYW1;C9K0I9;C9JUP5	E9PDF6;O43795-2;O43795	Unconventional myosin-Ib	MYO1B	22.8614	23.1767	20.7587	21.5625	21.9846	19.9908	22.6685	23.2301	21.9999	22.205	22.8244	25	25	24	25.8	25.8	24.3	128.48	0	213.79	4519900000	162
747	E9PDI4;O00515;H0Y901	E9PDI4;O00515;H0Y901	Ladinin-1	LAD1	18.2752	16.6277	NaN	16.5157	NaN	NaN	18.4519	17.1211	17.9486	19.148	20.2568	4	4	4	7.9	7.9	7.9	58.677	0	7.9245	127100000	10
748	E9PDL2;P42658-2;E9PF59;P42658;A0A087WTG7	E9PDL2;P42658-2;E9PF59;P42658	Dipeptidyl aminopeptidase-like protein 6	DPP6	21.9326	NaN	16.0875	NaN	19.2149	20.7906	NaN	NaN	NaN	NaN	17.5679	8	8	8	15.4	15.4	15.4	86.326	0	15.428	335470000	15
749	E9PE17;I3L0E3;Q9Y2R5	E9PE17;I3L0E3;Q9Y2R5	28S ribosomal protein S17, mitochondrial	MRPS17;hCG_1984214	23.1898	21.4204	21.8718	21.7773	22.7196	21.1422	21.8677	22.4694	21.865	21.9703	22.2052	3	3	3	36.4	36.4	36.4	14.374	0	34.121	445960000	24
750	E9PHM6;F6QMI7;E9PEB9;Q03001;E7ERU0;F8W9J4;Q03001-8;E7ETB9;Q6P0N6;Q03001-9;Q03001-13;Q5T0V7	E9PHM6;F6QMI7;E9PEB9;Q03001;E7ERU0;F8W9J4;Q03001-8;E7ETB9;Q6P0N6;Q03001-9	Dystonin	DST	17.0298	14.1068	17.9693	15.6884	18.4521	16.9117	NaN	14.9347	14.5806	NaN	NaN	41	17	17	9.3	4	4	629.78	0	28.551	372150000	15
751	E9PEE8;P18564-2;P18564;A0A087WXP3	E9PEE8;P18564-2;P18564;A0A087WXP3	Integrin beta;Integrin beta-6	ITGB6	23.0456	21.996	16.2292	22.136	17.3529	21.4842	22.82	22.8868	21.9554	23.4331	23.1468	7	7	7	10.6	10.6	10.6	81.543	0	25.307	2697100000	57
752	H0Y547;E9PEJ6;P98196	H0Y547;E9PEJ6;P98196	Phospholipid-transporting ATPase;Probable phospholipid-transporting ATPase IH	ATP11A	NaN	NaN	17.0461	NaN	17.6691	NaN	NaN	NaN	NaN	NaN	NaN	1	1	1	2.5	2.5	2.5	106.51	0.00042544	3.9007	19249000	2
753	E9PEP6;O14786;E7EX60;Q5T7F0;O14786-3;O14786-2;Q5JWQ4;Q5JWQ6;H0Y4A0	E9PEP6;O14786;E7EX60;Q5T7F0;O14786-3;O14786-2;Q5JWQ4;Q5JWQ6	Neuropilin-1	NRP1	20.3991	18.4253	19.894	NaN	19.1979	19.6409	19.7539	19.2549	18.7866	18.6566	20.1376	8	8	8	14.1	14.1	14.1	101.3	0	17.765	448730000	17
754	E9PER6;O15530-2;O15530-3;O15530;Q6A1A2;O15530-4;O15530-5	E9PER6;O15530-2;O15530-3;O15530;Q6A1A2;O15530-4;O15530-5	3-phosphoinositide-dependent protein kinase 1;Putative 3-phosphoinositide-dependent protein kinase 2	PDPK1;PDPK2P	18.0408	23.7216	17.8751	18.0947	19.3214	NaN	NaN	17.3488	NaN	16.4928	17.3134	3	3	3	6.8	6.8	6.8	60.328	0.0004178	3.6555	471010000	5
755	E9PF05;Q8NBK3-2;Q8NBK3-4;Q8NBK3-5;Q8NBK3	E9PF05;Q8NBK3-2;Q8NBK3-4;Q8NBK3-5;Q8NBK3	Sulfatase-modifying factor 1	SUMF1	NaN	NaN	NaN	NaN	19.603	NaN	18.8153	NaN	NaN	NaN	NaN	1	1	1	6.2	6.2	6.2	25.707	0.00042167	3.7883	12576000	1
756	E9PF10;O75694-2;O75694	E9PF10;O75694-2;O75694	Nuclear pore complex protein Nup155	NUP155	22.0006	22.3305	22.4728	21.9691	22.966	20.8499	22.1951	22.1148	21.8496	22.3116	22.0662	25	25	25	22.2	22.2	22.2	148.09	0	170.7	3483500000	141
757	E9PF16;Q96CM8-3;Q96CM8;Q96CM8-2;Q96CM8-4;D6RF87	E9PF16;Q96CM8-3;Q96CM8;Q96CM8-2;Q96CM8-4	Acyl-CoA synthetase family member 2, mitochondrial	ACSF2	22.2333	22.8074	19.0785	23.0539	19.9583	21.4738	17.8487	20.0984	19.1307	NaN	17.7445	9	9	9	19.2	19.2	19.2	63.652	0	30.263	806230000	21
758	E9PF17;P13611-3;P13611;P13611-5;P13611-4;P13611-2;Q86W61;D6RGZ6	E9PF17;P13611-3;P13611;P13611-5;P13611-4;P13611-2	Versican core protein	VCAN	23.0862	19.9898	19.1414	18.9696	17.2883	23.1826	23.0349	21.4852	21.1758	22.054	22.0112	19	19	19	13.8	13.8	13.8	176.83	0	114.34	4492900000	99
759	E9PF18;Q16836;Q16836-3;Q16836-2	E9PF18;Q16836;Q16836-3;Q16836-2	Hydroxyacyl-coenzyme A dehydrogenase, mitochondrial	HADH	25.0664	24.4129	23.428	24.1049	23.957	23.386	24.0025	23.546	23.5593	23.2422	23.5323	11	11	11	47.8	47.8	47.8	35.236	0	169.26	4096100000	109
760	E9PF19;Q9Y4P3;Q96E41;A0A087WXC6;F8WCR3;F8WDI9	E9PF19;Q9Y4P3;Q96E41	Transducin beta-like protein 2	TBL2	22.2855	20.9761	24.0518	22.3027	23.5504	21.0156	21.633	22.0596	21.2174	21.5689	22.2171	9	9	9	29	29	29	45.935	0	93.595	2105200000	48
761	E9PGF5;E9PF55;Q9HBL0;A0A087WWW7;Q59G71;E7ERH1;E7EMG1;Q9HBL0-2;C9JI43;C9JFT7;C9J8K5	E9PGF5;E9PF55;Q9HBL0;A0A087WWW7;Q59G71	Tensin-1	TNS1	20.0958	20.2817	21.0859	17.7711	21.7854	21.5757	16.3261	19.0603	17.3667	16.9625	18.458	19	18	17	14.9	14.1	13.7	183.22	0	52.722	1245100000	35
762	E9PFK9;Q9UJ41-2;Q9UJ41-4;Q9UJ41-3;Q9UJ41	E9PFK9;Q9UJ41-2;Q9UJ41-4;Q9UJ41-3;Q9UJ41	Rab5 GDP/GTP exchange factor	RABGEF1	NaN	NaN	NaN	NaN	NaN	17.1393	NaN	15.7422	NaN	NaN	14.9744	3	3	3	5.2	5.2	5.2	58.394	0.0023576	2.9323	13948000	4
763	E9PFP8;P57721-5;P57721-4;P57721;J3QT27;P57721-2;P57721-3	E9PFP8;P57721-5;P57721-4;P57721;J3QT27;P57721-2;P57721-3	Poly(rC)-binding protein 3	PCBP3	NaN	NaN	18.3852	NaN	20.1152	NaN	NaN	NaN	NaN	NaN	NaN	8	3	3	32.4	14.4	14.4	38.187	0	9.775	34458000	4
764	E9PFR3;Q14738;H0Y8C4;Q14738-3;Q14738-2;H7C5Q9;H0YJ49	E9PFR3;Q14738;H0Y8C4;Q14738-3;Q14738-2;H7C5Q9	Serine/threonine-protein phosphatase 2A 56 kDa regulatory subunit delta isoform	PPP2R5D	19.168	20.1479	20.2396	19.6567	19.9508	22.4271	17.8256	18.7805	17.4312	18.751	18.4545	9	9	5	16.5	16.5	10.1	69.116	0	17.714	413070000	26
765	E9PFW2;O00462	E9PFW2;O00462	Beta-mannosidase	MANBA	NaN	NaN	NaN	NaN	16.7633	NaN	NaN	NaN	15.6338	NaN	NaN	1	1	1	2.1	2.1	2.1	94.411	0.00041754	3.6497	5835100	1
766	E9PG40;P05067-7;P05067-11;P05067-8;P05067-9;P05067;H7C0V9;P05067-10;P05067-3;P05067-4;P05067-5;P05067-6;H7C2L2;P05067-2	E9PG40;P05067-7;P05067-11;P05067-8;P05067-9;P05067;H7C0V9;P05067-10;P05067-3;P05067-4;P05067-5;P05067-6	Amyloid beta A4 protein;N-APP;Soluble APP-alpha;Soluble APP-beta;C99;Beta-amyloid protein 42;Beta-amyloid protein 40;C83;P3(42);P3(40);C80;Gamma-secretase C-terminal fragment 59;Gamma-secretase C-terminal fragment 57;Gamma-secretase C-terminal fragment 50;C31	APP	22.3391	20.6917	22.673	24.9207	22.9959	20.5185	21.2754	21.1722	20.1006	21.9203	21.1214	15	15	15	26.6	26.6	26.6	80.832	0	59.149	2712900000	59
767	Q5TG12;E9PGC5;Q15262;Q15262-2;Q15262-3;Q15262-4;H0Y6V4;H0Y6P5	Q5TG12;E9PGC5;Q15262;Q15262-2;Q15262-3;Q15262-4;H0Y6V4;H0Y6P5	Protein-tyrosine-phosphatase;Receptor-type tyrosine-protein phosphatase kappa	PTPRK	18.2497	16.9648	18.8628	18.0998	18.5771	NaN	NaN	18.4676	14.8904	NaN	17.8244	4	4	4	3.1	3.1	3.1	164.2	0.00021815	4.2521	163780000	5
768	E9PGC8;P78559;P78559-2	E9PGC8;P78559;P78559-2	Microtubule-associated protein 1A;MAP1A heavy chain;MAP1 light chain LC2	MAP1A	20.7402	16.4113	19.8257	17.7802	20.1313	21.0928	NaN	15.8487	NaN	NaN	14.7269	17	16	16	9.2	8.9	8.9	331.25	0	46.063	982900000	42
769	E9PGN7;P05155-2;P05155;P05155-3;H9KV48;H0YCA1	E9PGN7;P05155-2;P05155;P05155-3;H9KV48	Plasma protease C1 inhibitor	SERPING1	22.001	22.5623	21.4892	18.317	22.5251	20.0973	23.0186	NaN	18.0975	22.2835	17.9904	9	9	9	17.1	17.1	17.1	59.491	0	36.653	1008400000	22
770	E9PGT1;Q15631;H7C1D4;Q15631-2	E9PGT1;Q15631;H7C1D4;Q15631-2	Translin	TSN	21.6661	23.9478	22.422	22.9663	22.5125	24.8107	22.299	20.6884	21.3932	22.0297	18.7731	10	10	10	43.5	43.5	43.5	25.572	0	36.054	1282200000	43
771	E9PGT3;E9PRI4;Q15418;Q15418-2;Q15418-3;B1AXG1;E9PMM7;E9PAN7;B1AXG2;Q5SVM7;Q5SVM6;V9GXZ1;E7ERL6;E7EWQ5;J3QT34;Q96GX5-2;Q96GX5-3;Q96GX5;O60307;Q9Y2H9;Q6P0Q8-2;Q6P0Q8;O15021-2;O15021-3;O15021-1;O15021	E9PGT3;E9PRI4;Q15418;Q15418-2;Q15418-3	Ribosomal protein S6 kinase;Ribosomal protein S6 kinase alpha-1	RPS6KA1	21.4796	21.1422	20.2321	21.859	19.835	18.9607	22.176	21.5361	21.1823	21.9801	21.5369	14	14	6	22.4	22.4	11.3	81.471	0	38.013	1451600000	39
772	E9PGT6;Q99627-2;Q99627;H7C3S9	E9PGT6;Q99627-2;Q99627;H7C3S9	COP9 signalosome complex subunit 8	COPS8	20.15	21.7987	23.0639	21.15	23.0028	20.8683	21.1578	19.1665	17.5267	21.5075	22.176	4	4	4	43.9	43.9	43.9	19.344	0	14.701	303120000	18
773	E9PH70;Q9ULH0-2;Q9ULH0-4;Q9ULH0;H0Y8E4;Q9ULH0-3;H7C584;Q9ULH0-5	E9PH70;Q9ULH0-2;Q9ULH0-4;Q9ULH0;H0Y8E4;Q9ULH0-3	Kinase D-interacting substrate of 220 kDa	KIDINS220	19.2168	18.8526	18.8124	19.9485	18.5096	17.3505	19.2878	19.361	19.2331	20.7029	20.4701	11	11	11	9.7	9.7	9.7	145.47	0	13.085	639720000	33
774	E9PHF7;Q96RQ3;E9PG35;F5GYT8;G5E9X5	E9PHF7;Q96RQ3;E9PG35;F5GYT8;G5E9X5	Methylcrotonoyl-CoA carboxylase subunit alpha, mitochondrial	MCCC1	23.3656	22.7196	22.0662	22.2071	22.6206	20.196	22.5636	22.978	23.1575	21.7187	23.0672	13	13	13	29.4	29.4	29.4	68.331	0	131.87	2715100000	98
775	E9PHG5;Q6UW02;Q6UW02-2;Q8WZ13;C9J8K7;F8WBE2	E9PHG5;Q6UW02;Q6UW02-2;Q8WZ13;C9J8K7	Cytochrome P450 20A1	CYP20A1	21.4773	21.3201	20.1165	20.6556	20.7962	18.5304	21.5498	20.9601	20.5235	19.6059	20.022	10	10	10	26.4	26.4	26.4	53.448	0	29.908	621940000	34
776	E9PHI4;O94901-8;O94901;O94901-9;O94901-5;H0Y6N5;O94901-6;H7C2K3;H7C3X3;O94901-2;O94901-7;O94901-3;H7C019;C9JK55	E9PHI4;O94901-8;O94901;O94901-9;O94901-5;H0Y6N5;O94901-6	SUN domain-containing protein 1	SUN1	22.3477	23.2458	22.9358	22.6439	23.1366	20.8468	21.9625	22.7639	22.2477	21.7671	21.9365	21	21	1	30.4	30.4	1.3	91.112	0	45.588	2942800000	98
777	E9PHR9;Q9NRQ2-2;Q9NRQ2;C9J6E1	E9PHR9;Q9NRQ2-2;Q9NRQ2;C9J6E1	Phospholipid scramblase 4	PLSCR4	20.8649	18.7593	19.8887	NaN	NaN	21.9039	NaN	NaN	NaN	NaN	NaN	2	2	2	9.2	9.2	9.2	26.249	0.00021363	3.9678	55520000	3
778	E9PHV5;P28290-2;P28290-3;P28290;E7EUL7	E9PHV5;P28290-2;P28290-3;P28290;E7EUL7	Sperm-specific antigen 2	SSFA2	18.4887	14.8885	16.1133	19.0664	NaN	18.8665	15.4875	16.4584	16.7046	15.4891	16.2287	7	7	7	6.5	6.5	6.5	136.14	0	14.175	143490000	12
779	E9PHY5;O43491-4;E9PK52;O43491-3;I6L9B1;E9PII3;O43491-2;E9PQD2;E9PQN0;E9PRG1;E9PIG0;E9PJP4;E9PPC9	E9PHY5;O43491-4;E9PK52;O43491-3;I6L9B1;E9PII3;O43491-2	Band 4.1-like protein 2	EPB41L2	20.7351	21.0041	17.7264	18.6778	17.7818	20.289	NaN	NaN	17.7798	NaN	NaN	25	1	0	32.7	1.3	0	104.36	0	40.254	366680000	6
780	E9PHY8;Q8NDA8;Q8NDA8-2;Q8NDA8-7;Q8NDA8-6;Q8NDA8-4;Q8NDA8-3;Q8NDA8-5	E9PHY8;Q8NDA8;Q8NDA8-2	Maestro heat-like repeat-containing protein family member 1	MROH1	18.4437	17.1282	18.6731	18.3482	18.3324	18.5166	18.3315	14.1105	14.4244	17.7956	NaN	7	7	7	4.5	4.5	4.5	180.28	0	6.7467	245150000	10
781	Q5T6K7;E9PI99;Q5T6K5;Q13952-6;Q13952-7;Q13952-2;Q13952-5;Q13952-3;Q13952;E9PJA8;E9PQR2;Q13952-4	Q5T6K7;E9PI99;Q5T6K5;Q13952-6;Q13952-7;Q13952-2;Q13952-5;Q13952-3;Q13952;E9PJA8;E9PQR2;Q13952-4	Nuclear transcription factor Y subunit gamma	NFYC	21.3511	21.8238	19.835	20.6243	21.5422	NaN	21.1938	20.7341	20.7003	20.6805	21.1983	2	2	2	15.5	15.5	15.5	14.909	0.00042553	3.907	233600000	12
782	E9PIB2;G3V1A6;P57764	E9PIB2;G3V1A6;P57764	Gasdermin-D	GSDMD	19.0884	19.538	18.5731	19.421	18.5716	20.7177	19.5277	18.2122	18.4231	18.5889	19.0757	1	1	1	4.7	4.7	4.7	30.824	0.0015946	3.1165	112960000	8
783	E9PIE3;Q969G5	E9PIE3;Q969G5	Protein kinase C delta-binding protein	PRKCDBP	22.4278	23.0035	22.3675	21.7141	21.6152	22.0878	22.3887	22.4638	21.9199	22.6188	23.1611	5	5	5	17.7	17.7	17.7	31.088	0	16.732	1043500000	14
784	E9PIE4	E9PIE4		MTCH2	19.6192	20.0245	20.1541	20.7677	20.0797	NaN	21.6978	21.0094	21.5739	20.9117	22.9854	11	1	1	59.7	4.6	4.6	28.662	0	10.238	273280000	7
785	E9PN66;E9PKN9;E9PS55;E9PMW4;E9PQ46;E9PIN5;E9PIK4;U3KQ32;E9PKZ4;E9PPM1;O14683;E9PNB3;E9PMY0	E9PN66;E9PKN9;E9PS55;E9PMW4;E9PQ46;E9PIN5;E9PIK4;U3KQ32;E9PKZ4;E9PPM1;O14683;E9PNB3;E9PMY0	Tumor protein p53-inducible protein 11	TP53I11	23.7656	23.266	NaN	23.6091	23.6321	NaN	22.3355	24.0094	21.9054	22.9429	24.1302	3	3	3	54.8	54.8	54.8	6.8649	0	7.3119	453940000	4
786	E9PIM6;E9PNQ8;P04216;J3QRJ3	E9PIM6;E9PNQ8;P04216;J3QRJ3	Thy-1 membrane glycoprotein	THY1	28.3079	26.1072	27.0928	26.0378	26.8564	27.2153	24.2874	26.0027	25.0134	25.3658	25.9876	3	3	3	25.5	25.5	25.5	17.041	0	215.02	11403000000	92
787	E9PIP3;Q9Y4H4	E9PIP3;Q9Y4H4	G-protein-signaling modulator 3	GPSM3	20.1695	NaN	NaN	NaN	NaN	NaN	20.2385	NaN	19.1589	18.3941	19.7414	2	2	2	23.6	23.6	23.6	17.639	0	13.328	79927000	2
788	E9PIU3;H7BXM1;J3KQ12;Q96G97-4;H0YF20;E9PJK0;E9PSB5;F8W7Q8;Q96G97-3;Q96G97	E9PIU3;H7BXM1;J3KQ12;Q96G97-4;H0YF20;E9PJK0;E9PSB5;F8W7Q8;Q96G97-3;Q96G97	Seipin	BSCL2	24.1582	20.5495	23.8619	20.8549	24.0146	22.8121	20.7506	NaN	21.3162	20.4934	NaN	2	2	2	14.2	14.2	14.2	25.082	0	55.511	800360000	10
789	E9PIY1;Q9UKS6;E9PJ75;E9PNM9	E9PIY1;Q9UKS6;E9PJ75;E9PNM9	Protein kinase C and casein kinase substrate in neurons protein 3	PACSIN3	22.2872	22.55	17.5638	21.454	17.2523	20.495	22.3896	22.4329	22.5026	22.1085	21.6981	4	4	4	10.9	10.9	10.9	37.213	0	10.29	830860000	21
790	E9PJ29;Q86UD1	E9PJ29;Q86UD1	Out at first protein homolog	OAF	NaN	17.9439	NaN	20.3242	18.7606	NaN	NaN	NaN	NaN	NaN	NaN	1	1	1	7	7	7	18.091	0.0015927	3.1076	14063000	3
791	E9PJ42;Q5BJD5-3;Q5BJD5-2;Q5BJD5	E9PJ42;Q5BJD5-3;Q5BJD5-2;Q5BJD5	Transmembrane protein 41B	TMEM41B	22.5491	22.0847	20.0429	21.6909	21.5395	18.7582	21.8389	22.1988	21.4895	21.5072	21.3768	1	1	1	9.7	9.7	9.7	21.72	0	20.942	250290000	16
792	E9PJ55;Q9NUJ3;H0YES4	E9PJ55;Q9NUJ3	T-complex protein 11-like protein 1	TCP11L1	15.4323	NaN	18.0369	NaN	17.8651	15.6282	17.8011	NaN	NaN	NaN	NaN	4	4	4	6.4	6.4	6.4	67.238	0	5.2893	30745000	5
793	E9PRD4;H7C5A7;E9PJN0;O14734	E9PRD4;H7C5A7;E9PJN0;O14734	Acyl-coenzyme A thioesterase 8	ACOT8	20.6111	NaN	19.9831	19.8858	NaN	20.3251	19.8963	NaN	18.8213	19.5785	NaN	1	1	1	13.5	13.5	13.5	19.587	0.00021758	4.2085	100950000	4
794	E9PK09;E9PQN2;E9PKI6;E9PK91;Q9NYF8-3;Q9NYF8-2;Q9NYF8;Q9NYF8-4;E9PJA7;H0YF00	E9PK09;E9PQN2;E9PKI6;E9PK91;Q9NYF8-3;Q9NYF8-2;Q9NYF8;Q9NYF8-4;E9PJA7	Bcl-2-associated transcription factor 1	BCLAF1	20.7788	23.2693	23.6552	22.674	23.3961	18.9425	19.3897	21.1371	18.844	21.1097	21.1009	11	11	11	17.8	17.8	17.8	83.231	0	62.559	2099900000	40
795	E9PK12;Q9BT04-3;Q9BT04;Q9BT04-2	E9PK12;Q9BT04-3;Q9BT04;Q9BT04-2	Protein fuzzy homolog	FUZ	NaN	NaN	NaN	NaN	NaN	19.6713	NaN	NaN	NaN	NaN	NaN	2	2	2	8.7	8.7	8.7	40.673	0	7.1954	15029000	2
796	E9PK21;Q9UNP9-2;Q9UNP9;Q9UNP9-3	E9PK21;Q9UNP9-2;Q9UNP9;Q9UNP9-3	Peptidyl-prolyl cis-trans isomerase E	PPIE	17.7478	18.8659	19.2464	18.5576	18.5638	17.3997	NaN	18.8923	NaN	17.8713	NaN	1	1	1	12	12	12	22.788	0	11.596	35908000	4
797	E9PS17;E9PK59;Q96KG9-5;Q96KG9-3;Q96KG9-4;Q96KG9-6;Q96KG9-2;Q96KG9;E9PPN3;H0YCI6	E9PS17;E9PK59;Q96KG9-5;Q96KG9-3;Q96KG9-4;Q96KG9-6;Q96KG9-2;Q96KG9;E9PPN3	N-terminal kinase-like protein	SCYL1	19.4961	19.7582	21.034	19.7411	20.2683	18.9656	20.3445	19.7461	19.1007	20.0236	20.3007	6	6	6	12.8	12.8	12.8	85.718	0	16.706	515580000	27
798	E9PK67;E9PNI7;Q53GL7;E9PSG8;E9PLE8;E9PPU2;E9PQQ6;E9PM86;E9PSE7;E9PIA6;E9PIK9;E9PJI2;E9PPV8;F8W8G7;E9PPE7	E9PK67;E9PNI7;Q53GL7;E9PSG8;E9PLE8;E9PPU2;E9PQQ6;E9PM86;E9PSE7;E9PIA6;E9PIK9;E9PJI2;E9PPV8;F8W8G7;E9PPE7	Poly [ADP-ribose] polymerase 10	PARP10	NaN	17.1063	16.2869	NaN	NaN	18.3659	16.157	NaN	NaN	NaN	NaN	2	2	2	3.5	3.5	3.5	109.1	0.00021749	4.2069	40048000	2
799	E9PL74;H0YDE2;E9PKC0;Q6IQ23-3;Q6IQ23;Q6IQ23-2	E9PL74;H0YDE2;E9PKC0;Q6IQ23-3;Q6IQ23;Q6IQ23-2	Pleckstrin homology domain-containing family A member 7	PLEKHA7	20.3094	17.9971	17.7644	17.883	18.9282	19.9838	17.5032	NaN	19.0566	NaN	NaN	2	2	2	14.4	14.4	14.4	18.365	0.001608	3.2106	55797000	8
800	E9PKG1;H7C2I1;Q99873-3;Q99873-2;Q99873-4;Q99873;A0A087X1W2;E9PIX6;E9PQ98;E9PNR9;H0YDE4;E9PMW9;E9PI83;Q9NR22-2;Q9NR22	E9PKG1;H7C2I1;Q99873-3;Q99873-2;Q99873-4;Q99873;A0A087X1W2;E9PIX6;E9PQ98	Protein arginine N-methyltransferase 1	PRMT1	22.621	24.3774	24.4332	23.4694	24.469	22.321	23.2674	22.3685	22.2406	23.5689	22.4079	12	12	12	48	48	48	37.709	0	55.279	2729800000	84
801	E9PKH8;P11836	E9PKH8;P11836	B-lymphocyte antigen CD20	MS4A1	NaN	NaN	NaN	NaN	NaN	NaN	NaN	NaN	NaN	NaN	NaN	1	1	1	6.7	6.7	6.7	31.609	0	20.288	24972000	2
802	E9PKW1;Q9NS15-2;Q9NS15;H0YCX6;H0YC99	E9PKW1;Q9NS15-2;Q9NS15	Latent-transforming growth factor beta-binding protein 3	LTBP3	18.4456	16.8091	17.8839	18.2803	18.6941	NaN	NaN	21.0913	19.6568	NaN	18.1665	6	6	6	8.5	8.5	8.5	122.11	0	58.129	328360000	19
803	E9PL10;Q96K17;Q96K17-2	E9PL10;Q96K17	Transcription factor BTF3;Transcription factor BTF3 homolog 4	BTF3L4	NaN	21.7344	21.2	21.3611	19.8359	NaN	NaN	NaN	20.1637	21.5275	20.6158	3	3	3	24.1	24.1	24.1	15.779	0	6.5476	184810000	5
804	E9PL24;Q5VU43-2	E9PL24;Q5VU43-2	Myomegalin	PDE4DIP	NaN	NaN	16.7176	NaN	15.8691	NaN	NaN	NaN	NaN	NaN	NaN	4	1	1	5.4	1.4	1.4	126.95	0.00082542	3.4922	11733000	1
805	E9PL57;Q86V88-3;Q86V88-2;Q86V88	E9PL57;Q86V88-3;Q86V88-2;Q86V88	Magnesium-dependent phosphatase 1	NEDD8-MDP1;MDP1	NaN	18.6485	20.1471	17.9165	19.0623	20.4211	NaN	NaN	NaN	NaN	NaN	1	1	1	7.6	7.6	7.6	19.536	0.005136	2.5869	45251000	1
806	E9PLD3;E9PRG8	E9PLD3;E9PRG8	Uncharacterized protein C11orf98	C11orf98	NaN	NaN	NaN	NaN	19.5766	NaN	NaN	NaN	NaN	NaN	NaN	1	1	1	13.1	13.1	13.1	11.6	0.0056625	2.504	3909500	1
807	E9PS47;E9PLE4;Q9BVG9	E9PS47;E9PLE4;Q9BVG9	Phosphatidylserine synthase 2	PTDSS2	NaN	NaN	NaN	NaN	NaN	NaN	20.5554	NaN	NaN	20.9919	NaN	1	1	1	36.7	36.7	36.7	6.3166	0	4.9064	14506000	2
808	E9PLK3;P55786;P55786-2;A6NEC2;A6NEC2-2;H0YDG0;E9PP11;E9PJ74;H0YCQ5;E9PJY4;E9PPD4;E9PRQ5;A6NEC2-3;E9PI82	E9PLK3;P55786;P55786-2	Puromycin-sensitive aminopeptidase	NPEPPS	23.0569	22.6074	22.4764	22.7171	22.5268	22.9927	22.8073	21.1573	22.2169	22.8922	20.8206	27	27	27	33.4	33.4	33.4	102.99	0	85.936	3781800000	135
809	E9PLL6;P46776;E9PJD9;E9PLX7	E9PLL6;P46776;E9PJD9	60S ribosomal protein L27a	RPL27A	26.4544	27.11	26.8115	27.0984	27.0531	24.5699	24.3584	25.5872	24.0261	26.6359	25.4347	5	5	5	38.9	38.9	38.9	12.201	0	31.704	5667900000	61
810	E9PPJ5;E9PLM6;P21741;P21741-2	E9PPJ5;E9PLM6;P21741	Midkine	MDK	NaN	23.21	28.0169	24.8686	26.4991	NaN	NaN	19.7994	NaN	NaN	NaN	8	8	8	51.9	51.9	51.9	14.374	0	323.31	3261600000	33
811	I3L3B4;F8W9H0;E9PLN8;Q9BQB6-3;Q9BQB6-2;Q9BQB6	I3L3B4;F8W9H0;E9PLN8;Q9BQB6-3;Q9BQB6-2;Q9BQB6	Vitamin K epoxide reductase complex subunit 1	VKORC1	NaN	NaN	23.577	NaN	24.2012	23.0912	NaN	NaN	NaN	NaN	NaN	1	1	1	12.5	12.5	12.5	11.082	0	12.999	322370000	4
812	E9PLS4;E9PP98;Q9Y5Y5;Q9Y5Y5-2	E9PLS4;E9PP98;Q9Y5Y5;Q9Y5Y5-2	Peroxisomal membrane protein PEX16	PEX16	19.6914	NaN	NaN	NaN	19.2375	19.1057	NaN	19.2981	NaN	NaN	19.1278	1	1	1	8.8	8.8	8.8	17.996	0.0036694	2.7407	46265000	5
813	E9PLT0;O75534-2;O75534;O75534-3;O75534-4;E9PNG3	E9PLT0;O75534-2;O75534;O75534-3;O75534-4	Cold shock domain-containing protein E1	CSDE1	20.2249	20.3854	21.6571	19.6136	21.2141	21.0654	16.2695	19.833	19.2827	19.7856	19.7914	8	8	8	13.3	13.3	13.3	74.583	0	19.429	720340000	13
814	E9PMG1;H0YDT0;Q96D71-2;Q96D71-4;Q96D71-3;Q96D71;F2Z3L2;H0YE89;Q8NFH8-3;Q8NFH8-2;Q8NFH8-4;Q8NFH8	E9PMG1;H0YDT0;Q96D71-2;Q96D71-4;Q96D71-3;Q96D71;F2Z3L2	RalBP1-associated Eps domain-containing protein 1	REPS1	19.0173	18.5078	18.557	NaN	18.4027	NaN	NaN	17.9684	17.5651	16.9627	18.4874	3	3	3	3.8	3.8	3.8	80.435	0	6.4795	132780000	4
815	E9PMR4;P48509;E9PRJ3;E9PLZ6;K4DIB7	E9PMR4;P48509;E9PRJ3	Tetraspanin;CD151 antigen	CD151	24.0084	23.8155	22.7453	25.1498	23.5315	24.6337	23.2153	23.1312	23.1308	23.5567	22.2352	3	3	3	10	10	10	28.067	0	7.7595	1830700000	18
816	E9PMR6;Q9NZN5-2;Q9NZN5	E9PMR6;Q9NZN5-2;Q9NZN5	Rho guanine nucleotide exchange factor 12	ARHGEF12	19.0263	18.3281	18.2145	18.06	17.7642	17.8961	18.3369	18.5651	18.0708	18.5511	18.2837	6	6	6	4.3	4.3	4.3	161.91	0	6.1849	286100000	11
817	E9PMS6;F8WD26;J3KP06;Q8WWI1-3;Q8WWI1;Q8WWI1-4;Q8WWI1-2;E9PMP7;E9PMT2;Q8WWI1-5;H0Y424;H0YDG6;H0YE95	E9PMS6;F8WD26;J3KP06;Q8WWI1-3;Q8WWI1;Q8WWI1-4;Q8WWI1-2;E9PMP7;E9PMT2;Q8WWI1-5	LIM domain only protein 7	LMO7	16.1738	17.9058	15.7071	19.2302	17.6083	17.1219	NaN	18.0744	NaN	18.8355	18.8097	10	10	10	8.5	8.5	8.5	145.42	0	38.012	233200000	12
818	E9PMV2	E9PMV2		HLA-DQA1	25.459	20.5517	23.2659	24.1455	21.632	22.6337	22.8748	21.6341	23.4483	22.0841	22.9597	5	5	2	25.7	25.7	8.9	23.673	0	22	1248900000	44
819	E9PNK6;E9PPQ1;J3KNE7;Q16890-4;Q16890-3;Q16890-2;Q16890-5;Q16890;E9PNQ9	E9PNK6;E9PPQ1;J3KNE7;Q16890-4;Q16890-3;Q16890-2;Q16890-5;Q16890;E9PNQ9	Tumor protein D53	TPD52L1	NaN	20.0098	NaN	19.5706	18.9364	NaN	NaN	NaN	19.1169	19.6351	NaN	2	2	2	16.9	16.9	16.9	18.661	0	7.1684	40907000	5
820	E9PNL8;Q13574-6;Q13574-2;Q13574-4;Q13574-7;Q13574-5;Q13574-3;Q13574	E9PNL8;Q13574-6;Q13574-2;Q13574-4;Q13574-7;Q13574-5;Q13574-3;Q13574	Diacylglycerol kinase;Diacylglycerol kinase zeta	DGKZ	NaN	17.0668	NaN	NaN	NaN	NaN	NaN	NaN	NaN	NaN	NaN	1	1	1	1.7	1.7	1.7	78.927	0.0051272	2.5672	5766000	1
821	E9PNR2;Q13671-2;Q13671	E9PNR2;Q13671-2;Q13671	Ras and Rab interactor 1	RIN1	15.919	NaN	15.8063	15.7358	NaN	19.7549	16.5666	15.6107	17.0381	16.7794	16.9659	2	2	2	3.7	3.7	3.7	66.545	0.0021718	2.9927	48157000	12
822	E9PNW4;E9PR17;P13987;H0YET2	E9PNW4;E9PR17;P13987;H0YET2	CD59 glycoprotein	CD59	29.6749	27.6453	28.0738	27.7133	29.2626	29.1508	28.3711	28.5383	27.7211	28.509	28.7248	4	4	4	29.6	29.6	29.6	11.985	0	81.682	25632000000	59
823	E9PP16;Q8ND30-3;Q8ND30-2;Q8ND30;H0YET1	E9PP16;Q8ND30-3;Q8ND30-2;Q8ND30	Liprin-beta-2	PPFIBP2	16.4969	17.0607	NaN	NaN	NaN	NaN	18.1419	NaN	16.8397	18.7121	18.4533	4	2	2	6.7	3.5	3.5	81.379	0.0014176	3.2912	72628000	8
824	E9PP40;Q15048;E9PNL0;E9PRP5	E9PP40;Q15048;E9PNL0	Leucine-rich repeat-containing protein 14	LRRC14	NaN	NaN	15.7481	NaN	16.3418	19.5267	NaN	NaN	NaN	NaN	NaN	3	3	3	11.3	11.3	11.3	33.548	0.00042626	3.9313	18761000	3
825	Q4VAQ0;E9PP49;P25067	Q4VAQ0;E9PP49;P25067	Collagen alpha-2(VIII) chain	COL8A2	20.1417	NaN	19.0203	NaN	NaN	19.3992	NaN	19.2717	NaN	NaN	NaN	1	1	1	3	3	3	42.481	0.00021598	4.1352	54232000	3
826	E9PPI9;Q9NPD3	E9PPI9;Q9NPD3	Exosome complex component RRP41	EXOSC4	NaN	21.3198	20.3781	20.0438	22.1351	20.278	18.4985	20.6359	18.2459	20.7167	19.0529	2	2	2	15.4	15.4	15.4	16.579	0.001421	3.311	112150000	3
827	E9PPM8;Q9Y315;G3V158;E9PMH9;E9PML7;E9PPK3;E9PJ44;E9PJB9	E9PPM8;Q9Y315;G3V158;E9PMH9;E9PML7	Deoxyribose-phosphate aldolase	DERA	21.9796	21.9034	21.5201	21.1638	21.6726	21.0078	21.2783	21.2271	21.7903	22.1754	21.1306	6	6	6	30.2	30.2	30.2	30.517	0	20.954	738590000	45
828	E9PQ61;O75152;E9PBY7	E9PQ61;O75152;E9PBY7	Zinc finger CCCH domain-containing protein 11A	ZC3H11A	NaN	18.767	17.6653	16.2919	19.3604	NaN	NaN	NaN	NaN	15.8882	NaN	3	3	3	8.9	8.9	8.9	72.531	0	6.5171	68121000	7
829	E9PQ73;Q8TDW7-3;Q8TDW7;Q8TDW7-2	E9PQ73;Q8TDW7-3;Q8TDW7;Q8TDW7-2	Protocadherin Fat 3	FAT3	22.6878	20.6821	18.8194	20.1645	17.1661	24.023	20.9043	19.401	19.9112	19.6307	19.7298	2	2	2	0.6	0.6	0.6	488.84	0.0027387	2.8915	7477300000	24
830	H0YDN9;E9PQP3;G5E9L0;Q8N6H7-3;Q8N6H7-2;Q8N6H7;E9PMU9;E9PIY6	H0YDN9;E9PQP3;G5E9L0;Q8N6H7-3;Q8N6H7-2;Q8N6H7;E9PMU9;E9PIY6	ADP-ribosylation factor GTPase-activating protein 2	ARFGAP2	NaN	NaN	NaN	NaN	NaN	21.5243	NaN	NaN	NaN	NaN	NaN	2	2	2	9.7	9.7	9.7	25.691	0	5.7082	33178000	3
831	G3V1E1;E9PQT3;P17405-3;P17405-2;P17405-4;P17405	G3V1E1;E9PQT3;P17405-3;P17405-2;P17405-4;P17405	Sphingomyelin phosphodiesterase	SMPD1	NaN	NaN	18.9084	NaN	19.1037	NaN	NaN	NaN	NaN	NaN	NaN	1	1	1	3	3	3	39.842	0.005135	2.5832	16887000	1
832	E9PQW4;P27361-2;P27361-3;P27361;E9PJF0;E9PBK7;B3KR49;H0YDH9;H0YEX6;E9PRH7;Q16659	E9PQW4;P27361-2;P27361-3;P27361;E9PJF0;E9PBK7	Mitogen-activated protein kinase;Mitogen-activated protein kinase 3	MAPK3	22.4173	21.4005	21.1014	19.861	20.4049	23.5823	20.7099	20.1593	20.5825	20.9195	20.168	11	7	7	36.3	22.7	22.7	38.546	0	22.621	825610000	20
833	E9PR22;Q9UKR0;Q9UKR0-2	E9PR22;Q9UKR0;Q9UKR0-2	Kallikrein-12	KLK12	NaN	NaN	NaN	20.1248	NaN	NaN	NaN	NaN	NaN	NaN	NaN	1	1	1	18.6	18.6	18.6	19.376	0.00041876	3.6956	9146600	1
834	E9PR30;P62861	E9PR30;P62861	40S ribosomal protein S30	FAU	NaN	23.4333	19.9436	23.8562	24.0811	NaN	NaN	21.2508	NaN	23.1037	NaN	1	1	1	10.2	10.2	10.2	10.905	0.00082525	3.4889	340670000	12
835	E9PR38;H0YEH2;Q14671-4;Q14671;H0YDC5;Q8TB72-2;Q8TB72-4;Q8TB72-3;Q8TB72	E9PR38;H0YEH2;Q14671-4;Q14671	Pumilio homolog 1	PUM1	18.979	20.9149	19.7004	20.7838	19.8282	18.763	18.002	19.4902	NaN	19.9496	18.3688	4	4	1	5.1	5.1	1.6	100.5	0	32.541	316430000	9
836	E9PR44;P02511;A0A024R3B9;E9PJL7;E9PNH7;E9PRA8;E9PRS4;E9PS12;H0YCW8	E9PR44;P02511;A0A024R3B9;E9PJL7;E9PNH7;E9PRA8	Alpha-crystallin B chain	CRYAB	28.5645	27.2528	24.6156	29.2457	22.4797	31.2849	25.0161	25.0883	25.9091	26.9339	25.4855	13	13	13	69	69	69	20.03	0	323.31	57050000000	364
837	E9PRM7;Q96BI1	E9PRM7;Q96BI1	Solute carrier family 22 member 18	SLC22A18	NaN	20.7178	NaN	21.4282	NaN	NaN	21.9208	21.3469	21.1869	22.3446	NaN	2	2	2	5.8	5.8	5.8	34.952	0.00022477	4.6866	207870000	2
838	E9PRV7;P25098	E9PRV7;P25098	Beta-adrenergic receptor kinase 1	ADRBK1	19.8003	18.2952	18.7695	18.1354	17.3959	19.4096	19.2524	NaN	18.4003	NaN	18.6565	1	1	1	3.9	3.9	3.9	46.537	0.0042267	2.6718	119790000	2
839	E9PRY8;P29692-2;A0A087X1X7;H0YCK7;E9PIZ1;H0YE58;H0YE72;E9PQC9;E9PKH7;E9PNC8;E9PPY1;E9PJV8;E9PN56;E9PN71;E9PRL0;E9PQR8	E9PRY8;P29692-2;A0A087X1X7;H0YCK7	Elongation factor 1-delta	EEF1D	22.6662	24.0426	24.011	23.3083	24.129	21.7102	23.7896	22.6659	23.1196	23.7825	23.0741	14	14	4	27.7	27.7	9	76.569	0	189.5	5715800000	87
840	E9PS44;Q01628;H7BYV1;E9PQN9;P13164;Q01629	E9PS44;Q01628;H7BYV1;E9PQN9;P13164;Q01629	Interferon-induced transmembrane protein 3;Interferon-induced transmembrane protein 1;Interferon-induced transmembrane protein 2	IFITM3;IFITM2;IFITM1	26.5705	24.8202	24.6074	24.4519	23.6638	25.0944	23.5317	25.2629	24.1389	22.9922	24.6853	2	2	2	36.6	36.6	36.6	12.255	0	46.805	1135400000	17
841	E9PSD7;Q96BW1-3;Q96BW1	E9PSD7;Q96BW1-3;Q96BW1	Uracil phosphoribosyltransferase homolog	UPRT	NaN	NaN	19.1108	NaN	18.7374	NaN	NaN	NaN	NaN	NaN	NaN	1	1	1	7.5	7.5	7.5	19.485	0.0034863	2.7748	10032000	2
842	E9PSI1;G3V1B9;E9PNW2;E9PQI5;E9PQ80	E9PSI1;G3V1B9		TM9SF1	22.6172	22.5512	22.3082	20.5968	21.4056	17.1621	22.4338	21.8737	21.5797	22.5811	21.6716	8	8	0	13.5	13.5	0	92.386	0	24.748	1622300000	50
843	F1T0E5;Q9ULU8-2;Q9ULU8-3;Q9ULU8;Q9ULU8-4;H7C4T6;Q9ULU8-5;H7C4P2;H7C5J0;H7C538	F1T0E5;Q9ULU8-2;Q9ULU8-3;Q9ULU8;Q9ULU8-4	Calcium-dependent secretion activator 1	CADPS	18.0169	NaN	21.7905	NaN	21.4541	NaN	NaN	NaN	NaN	NaN	NaN	14	14	12	16.8	16.8	14.7	152	0	62.833	537430000	29
844	F1T0J2;Q14789;Q14789-2;E7EU81;H0Y867;H7C5I7	F1T0J2;Q14789;Q14789-2;E7EU81	Golgin subfamily B member 1	GOLGB1	19.7434	19.4526	21.0152	18.7448	21.0632	15.2457	19.0868	19.8758	19.0711	19.1902	19.3589	53	53	53	21.2	21.2	21.2	367.42	0	141.35	2272000000	108
845	F2Z2B9;Q9BSJ2;Q9BSJ2-4;Q9BSJ2-3;B3KTU7	F2Z2B9;Q9BSJ2;Q9BSJ2-4;Q9BSJ2-3	Gamma-tubulin complex component 2	TUBGCP2	NaN	16.2768	18.8568	17.312	19.0993	17.9286	NaN	NaN	NaN	NaN	NaN	4	4	4	7.6	7.6	7.6	82.603	0	7.2082	81808000	7
846	F2Z2J1;Q15349;Q15349-3;Q15349-2;B7Z3B5;D6R910;D6RHW7;D6RA62;D6RE03;D6RD75	F2Z2J1;Q15349;Q15349-3;Q15349-2;B7Z3B5;D6R910	Ribosomal protein S6 kinase;Ribosomal protein S6 kinase alpha-2	RPS6KA2	NaN	NaN	NaN	NaN	17.0193	NaN	NaN	NaN	NaN	NaN	NaN	9	3	3	12.5	4.2	4.2	85.633	0.00041815	3.6743	6376500	3
847	H0Y4W2;F2Z2U4;Q9Y4A5-2;Q9Y4A5	H0Y4W2;F2Z2U4;Q9Y4A5-2;Q9Y4A5	Transformation/transcription domain-associated protein	TRRAP	NaN	13.6138	16.2759	16.1792	16.3396	16.0061	15.5997	15.4984	15.5145	16.0138	15.6784	8	7	7	2.3	2.1	2.1	405.8	0	8.3364	164900000	9
848	F2Z357;J3KPC5;P47736;P47736-3;P47736-4;X6R8W7;P47736-2;Q5T3T1	F2Z357;J3KPC5;P47736;P47736-3;P47736-4;X6R8W7;P47736-2	Rap1 GTPase-activating protein 1	RAP1GAP	NaN	19.2593	20.4171	NaN	19.4051	18.8986	NaN	NaN	NaN	NaN	NaN	5	5	5	10.5	10.5	10.5	66.98	0	6.0426	93107000	5
849	F2Z3I4;Q5T371;Q5T370;Q8N5I2	F2Z3I4;Q5T371;Q5T370;Q8N5I2	Arrestin domain-containing protein 1	ARRDC1	NaN	18.7665	17.601	21.0209	20.1356	19.1683	NaN	19.0983	NaN	19.4146	20.9496	2	2	2	17.9	17.9	17.9	13.303	0.0016103	3.2215	70334000	4
850	F5GWE5;Q00169;I3L459;I3L4H1;I3L2X8;I3L4C0;I3L3W1;I3L471;I3L4U7;I3NI10	F5GWE5;Q00169;I3L459;I3L4H1;I3L2X8;I3L4C0	Phosphatidylinositol transfer protein alpha isoform	PITPNA	21.1894	21.5961	21.1666	20.6712	20.3634	21.625	21.0338	18.9637	19.7701	20.6256	17.0465	5	4	4	20.7	17.4	17.4	31.802	0	7.3029	510460000	6
851	F5GWI4;P00813;F5GXW0	F5GWI4;P00813;F5GXW0	Adenosine deaminase	ADA	NaN	NaN	NaN	NaN	NaN	NaN	18.0093	NaN	NaN	NaN	NaN	2	2	2	7.1	7.1	7.1	38.292	0	13.856	38294000	2
852	F5GWT4;Q9H4A3-2;Q9H4A3;Q9H4A3-5;Q9H4A3-6;Q9H4A3-7;Q9H4A3-4;F6UYG0	F5GWT4;Q9H4A3-2;Q9H4A3;Q9H4A3-5;Q9H4A3-6;Q9H4A3-7;Q9H4A3-4	Serine/threonine-protein kinase WNK1	WNK1	18.7179	17.4889	18.486	NaN	16.2987	19.1864	19.5097	17.8305	19.4558	18.2621	19.0243	4	4	4	2.2	2.2	2.2	225.5	0	5.5467	315340000	4
853	F5GWX5;Q14839;Q14839-2;O75052	F5GWX5;Q14839;Q14839-2	Chromodomain-helicase-DNA-binding protein 4	CHD4	19.0159	20.186	21.5402	19.8363	21.5099	17.8724	18.8368	18.568	18.08	19.2163	18.9736	20	20	13	12.3	12.3	8.3	217.1	0	36.587	1197700000	44
854	F5GWY6;K7ER35;F5GYE9;Q6IA86-4;Q6IA86-7;Q6IA86-2;Q6IA86-3;Q6IA86-5;Q6IA86;Q6IA86-6	F5GWY6;K7ER35;F5GYE9;Q6IA86-4;Q6IA86-7;Q6IA86-2;Q6IA86-3;Q6IA86-5;Q6IA86;Q6IA86-6	Elongator complex protein 2	ELP2	NaN	NaN	NaN	NaN	22.7412	21.2385	NaN	NaN	NaN	NaN	NaN	1	1	1	31.4	31.4	31.4	5.5004	0.00021631	4.149	28456000	1
855	F5GX71;H3BPB8;P34949;P34949-2;H3BMZ9;H3BPP3;H3BP57;H3BT48;H3BUZ9;H3BPU7;H3BPM5;H3BN01;H3BNY8;H3BT46;B4DYB8	F5GX71;H3BPB8;P34949;P34949-2;H3BMZ9;H3BPP3;H3BP57;H3BT48;H3BUZ9	Mannose-6-phosphate isomerase	MPI	20.4293	20.2908	19.0923	19.9089	19.1011	21.5012	19.1248	NaN	NaN	NaN	NaN	4	4	4	13.9	13.9	13.9	41.205	0	8.6542	158470000	5
856	F5GX77;Q9UI30-2;Q9UI30;F5GYQ2	F5GX77;Q9UI30-2;Q9UI30;F5GYQ2	Multifunctional methyltransferase subunit TRM112-like protein	TRMT112	20.1423	20.596	20.7645	20.5951	21.2938	22.9897	NaN	20.4847	21.0067	20.0909	20.7858	2	2	2	24.5	24.5	24.5	11.972	0	6.4999	219570000	2
857	F5H6J5;F5GX80;Q6NZY4-2;Q6NZY4	F5H6J5;F5GX80;Q6NZY4-2;Q6NZY4	Zinc finger CCHC domain-containing protein 8	ZCCHC8	NaN	NaN	NaN	NaN	19.2687	NaN	NaN	NaN	NaN	NaN	NaN	1	1	1	7	7	7	20.879	0.0034911	2.7859	8211400	1
858	Q5T321;F5GXV7;Q8NFP9;Q8NFP9-3;Q8NFP9-2	Q5T321;F5GXV7;Q8NFP9	Neurobeachin	NBEA	NaN	14.7376	17.6256	NaN	16.3094	NaN	NaN	NaN	NaN	NaN	NaN	7	5	5	2.9	2.1	2.1	327.55	0	6.7477	50343000	5
859	F5GXW6;O95415	F5GXW6;O95415	Brain protein I3	BRI3	21.7041	NaN	21.1626	21.3301	21.503	NaN	21.4469	20.1531	NaN	NaN	NaN	1	1	1	16.3	16.3	16.3	10.863	0	5.21	61588000	2
860	F5GXX5;P61803;F5H895	F5GXX5;P61803;F5H895	Dolichyl-diphosphooligosaccharide--protein glycosyltransferase subunit DAD1	DAD1	25.4522	25.3401	25.7686	25.0445	25.6658	24.5819	25.9819	25.3086	25.0658	25.035	25.258	4	4	4	47.1	47.1	47.1	9.5541	0	39.105	3295000000	106
861	F5GY05;Q96EK7;Q96EK7-2;Q96EK7-3	F5GY05;Q96EK7;Q96EK7-2	Constitutive coactivator of peroxisome proliferator-activated receptor gamma	FAM120B	NaN	14.0069	18.8147	14.9335	19.1777	18.5431	NaN	NaN	NaN	NaN	NaN	7	7	7	9	9	9	106.12	0	19.752	86062000	10
862	F5GY16;O15357-2;O15357	F5GY16;O15357-2;O15357	Phosphatidylinositol 3,4,5-trisphosphate 5-phosphatase 2	INPPL1	NaN	NaN	NaN	NaN	NaN	18.4015	NaN	NaN	NaN	NaN	NaN	1	1	1	14.2	14.2	14.2	14.565	0.00042221	3.8098	2770100	1
863	F5GY80;F5H7G1;P07358	F5GY80;F5H7G1;P07358	Complement component C8 beta chain	C8B	20.6628	23.1814	21.1874	24.2391	19.5997	21.6919	21.0186	18.283	19.8471	18.3936	19.2576	17	17	17	33.6	33.6	33.6	60.04	0	90.053	1364200000	36
864	F5H4U8;F5H7C6;F5GYF7;F5H248;Q9UBW8;F5H4Z0;F5H3M6;G3XAP1;F5GXT7	F5H4U8;F5H7C6;F5GYF7;F5H248;Q9UBW8	COP9 signalosome complex subunit 7a	COPS7A	19.2252	18.808	20.8721	NaN	20.7044	21.3233	NaN	18.8705	NaN	NaN	NaN	3	3	3	28.8	28.8	28.8	13.663	0	9.8097	62424000	4
865	H0YGR4;F5GYG5;Q9Y3B8;H0YH58;F5GX07;H0YG83;H0YG54;Q9Y3B8-2;Q9Y3B8-3;F5H7P1;Q9BTR4;F5H6P8;H0YG37;F5H784	H0YGR4;F5GYG5;Q9Y3B8;H0YH58;F5GX07;H0YG83;H0YG54;Q9Y3B8-2;Q9Y3B8-3	Oligoribonuclease, mitochondrial	REXO2	NaN	NaN	NaN	NaN	19.4492	18.0253	NaN	NaN	NaN	21.3029	20.8259	3	3	3	17.2	17.2	17.2	22.006	0	4.8571	64324000	6
866	F5GYN4;J3KR44;Q96FW1;F5H6Q1;F5GYJ8;F5H3F0;Q96FW1-2	F5GYN4;J3KR44;Q96FW1;F5H6Q1;F5GYJ8;F5H3F0;Q96FW1-2	Ubiquitin thioesterase OTUB1	OTUB1	22.1535	23.0053	23.4788	22.9273	23.0213	23.0835	22.8153	20.4926	20.5406	22.6716	22.1635	10	10	10	47.7	47.7	47.7	28.05	0	55.848	1232400000	57
867	F5GYQ1;P61421;R4GN72;J3QL14;H3BQJ1;H3BQB4;H3BSG7	F5GYQ1;P61421;R4GN72;J3QL14	V-type proton ATPase subunit d 1	ATP6V0D1	24.6901	22.0981	25.7468	23.4839	26.1199	23.8424	23.9711	23.6073	24.2317	24.0067	23.5392	14	14	14	43.6	43.6	43.6	44.659	0	152.69	5535900000	141
868	F5GZH3;F5H866;F5GZ38;Q9UF11-4;Q9UF11-2;F5GYU9;F5H1B8;Q9UF11-3;Q9UF11;F5H3M1;F5H190;F5H114;F5H0R6;F5GY87	F5GZH3;F5H866;F5GZ38;Q9UF11-4;Q9UF11-2;F5GYU9;F5H1B8;Q9UF11-3;Q9UF11;F5H3M1	Pleckstrin homology domain-containing family B member 1	PLEKHB1	NaN	NaN	22.199	NaN	21.949	25.0103	NaN	NaN	NaN	NaN	NaN	4	4	4	43.5	43.5	43.5	17.767	0	14.302	469260000	11
869	F5GZ78;P49023-4;P49023-2;P49023;P49023-3;H0YIE4	F5GZ78;P49023-4;P49023-2;P49023;P49023-3;H0YIE4	Paxillin	PXN	20.8028	19.2029	20.7876	21.2476	20.3419	20.02	21.533	19.0317	20.8294	21.622	21.5716	6	6	6	12.1	12.1	12.1	64.232	0	15.306	709570000	26
870	F5GZC2;F5H6C1;F5H1N2;F5H126;O43581;O43581-2;F5GX00;F5H8G7	F5GZC2;F5H6C1;F5H1N2;F5H126;O43581;O43581-2	Synaptotagmin-7	SYT7	NaN	NaN	21.2663	NaN	20.7647	NaN	NaN	NaN	NaN	NaN	NaN	6	6	6	19.5	19.5	19.5	50.699	0	13.865	116200000	6
871	F5GZI3;Q5VWU8;Q5VWV2;Q8TEW0-9;Q8TEW0-10;Q8TEW0-8;Q8TEW0-5;Q8TEW0-3;Q8TEW0-7;Q8TEW0-6;Q8TEW0-4;Q8TEW0-11;Q8TEW0-2;Q8TEW0	F5GZI3;Q5VWU8;Q5VWV2;Q8TEW0-9;Q8TEW0-10;Q8TEW0-8;Q8TEW0-5;Q8TEW0-3;Q8TEW0-7;Q8TEW0-6;Q8TEW0-4;Q8TEW0-11;Q8TEW0-2;Q8TEW0	Partitioning defective 3 homolog	PARD3	NaN	16.4959	NaN	NaN	NaN	16.7776	15.8727	17.4937	15.129	15.8222	NaN	2	2	2	4.7	4.7	4.7	82.063	0.0036715	2.7482	29550000	3
872	F5GZK2;Q96P44-3;Q96P44;Q96P44-2	F5GZK2;Q96P44-3;Q96P44;Q96P44-2	Collagen alpha-1(XXI) chain	COL21A1	NaN	NaN	19.6294	NaN	20.739	NaN	15.4643	NaN	16.4208	NaN	NaN	2	2	2	2	2	2	99.294	0.001225	3.3795	161640000	3
873	F5GZS6;J3KPF3;P08195-2;P08195-3;P08195;P08195-4;H0YFS2;F5H0E2;F5GZI0;H0YFX4;F5H867;F5GZR9	F5GZS6;J3KPF3;P08195-2;P08195-3;P08195;P08195-4	4F2 cell-surface antigen heavy chain	SLC3A2	24.5612	21.8688	21.6958	23.3888	21.5405	24.3531	23.7272	22.7621	23.0231	23.6804	23.3385	17	17	17	34.9	34.9	34.9	64.872	0	184.77	4954600000	130
874	F5GZZ9;Q86VB7-3;Q86VB7;Q86VB7-2;C9JHR8;Q86VB7-4;H0YGZ7	F5GZZ9;Q86VB7-3;Q86VB7;Q86VB7-2;C9JHR8;Q86VB7-4	Scavenger receptor cysteine-rich type 1 protein M130;Soluble CD163	CD163	22.1436	21.2718	20.389	17.4069	19.3506	22.9125	24.4435	20.4898	21.9385	22.9833	22.8351	24	24	24	27.7	27.7	27.7	120.32	0	323.31	5220500000	132
875	F5H008;Q9H267-2;Q9H267	F5H008;Q9H267-2;Q9H267	Vacuolar protein sorting-associated protein 33B	VPS33B	18.6763	18.7713	18.6398	NaN	19.5752	19.6939	18.0306	NaN	16.7593	17.9232	18.4765	6	6	6	14.2	14.2	14.2	67.605	0	20.929	170320000	6
876	F5H0B0;H0YC42;U3KQQ8;E5RFR7;H0YC44;P55327-8	F5H0B0;H0YC42			21.0622	21.6793	21.5664	21.1624	21.6786	19.9284	20.378	20.5697	20.8474	20.9292	20.5695	4	4	0	19.4	19.4	0	27.468	0	21.844	401260000	12
877	F5H0U5;Q9NZD2;F5GZ49;H0YFS9	F5H0U5;Q9NZD2;F5GZ49;H0YFS9	Glycolipid transfer protein	GLTP	19.2013	20.7701	19.6966	19.7656	19.4827	18.913	20.7182	19.2123	19.6089	19.7062	18.7872	2	2	2	12.1	12.1	12.1	21.659	0.00022614	4.7798	133330000	6
878	K7ES92;F5H1R4;K7ES98;K7EM85;Q92619;Q92619-2	K7ES92;F5H1R4;K7ES98;K7EM85;Q92619;Q92619-2	Minor histocompatibility protein HA-1;Minor histocompatibility antigen HA-1	HMHA1	14.7019	NaN	15.7302	NaN	17.2236	NaN	16.0181	NaN	NaN	NaN	NaN	3	3	3	5.3	5.3	5.3	84.622	0	5.4057	42454000	3
879	F5H283;Q92563	F5H283;Q92563	Testican-2	SPOCK2	NaN	NaN	25.2043	NaN	24.0851	17.8831	NaN	NaN	NaN	NaN	NaN	10	10	10	22.9	22.9	22.9	46.649	0	116.33	1360700000	16
880	F5H2U8;F5H2A4;P52926;F5H6H0;P52926-3;P52926-6;P52926-4;P52926-5;P52926-2	F5H2U8;F5H2A4;P52926;F5H6H0;P52926-3;P52926-6;P52926-4;P52926-5;P52926-2	High mobility group protein HMGI-C	HMGA2	NaN	23.228	NaN	NaN	NaN	NaN	20.8228	21.7962	20.8261	22.1519	21.4988	2	2	2	31.3	31.3	31.3	10.767	0	67.349	99215000	4
881	F5H2F4;P11586;V9GYY3	F5H2F4;P11586	C-1-tetrahydrofolate synthase, cytoplasmic;Methylenetetrahydrofolate dehydrogenase;Methenyltetrahydrofolate cyclohydrolase;Formyltetrahydrofolate synthetase;C-1-tetrahydrofolate synthase, cytoplasmic, N-terminally processed	MTHFD1	21.4821	21.2845	22.072	21.2281	21.8058	22.0437	21.526	20.1584	20.6476	21.3825	20.1427	18	18	18	20.5	20.5	20.5	110.61	0	40.751	2074800000	76
882	F5H2N6;Q9HCI6-2;Q9HCI6	F5H2N6;Q9HCI6-2;Q9HCI6	Uncharacterized protein KIAA1586	KIAA1586	20.3083	17.7831	NaN	NaN	19.6332	18.4227	NaN	NaN	NaN	18.1655	17.7628	3	3	3	4.1	4.1	4.1	86.686	0.0014139	3.2592	164680000	3
883	F5H2T0;O95163;H0YDF3	F5H2T0;O95163	Elongator complex protein 1	IKBKAP	16.5199	17.8965	20.1728	15.8554	20.1724	NaN	15.6701	16.6882	NaN	18.4636	NaN	7	7	7	9.5	9.5	9.5	111.47	0	13.133	174660000	12
884	F5H365;Q15436;Q15436-2;G3V4V1;G3V1W4;G3V3G5;G3V2R6;G3V5X8;G3V4Q2;G3V5K1	F5H365;Q15436;Q15436-2	Protein transport protein Sec23A	SEC23A	23.6193	22.836	22.9992	23.1604	23.0283	21.6576	23.9659	23.7925	23.1697	23.8342	24.0558	20	17	17	36.8	31.9	31.9	82.968	0	297.27	5289400000	150
885	F5H442;Q99816;Q99816-2	F5H442;Q99816;Q99816-2	Tumor susceptibility gene 101 protein	TSG101	21.5382	20.1388	21.5816	18.5678	21.483	21.2749	20.1065	18.5357	20.0394	20.0167	20.6329	4	4	4	11	11	11	40.917	0	10.354	393700000	8
886	I3L3M4;K7EP40;K7EL87;F5H496;I3L3X1;O95471-2;O95471	I3L3M4;K7EP40;K7EL87;F5H496;I3L3X1;O95471-2;O95471	Claudin;Claudin-7	CLDN7	NaN	NaN	NaN	NaN	NaN	NaN	21.3644	22.9969	21.9903	21.2069	NaN	1	1	1	20.5	20.5	20.5	8.8353	0	15.089	35314000	5
887	F5H699;H3BQ93;F5H4D1;P51828	F5H699;H3BQ93;F5H4D1;P51828	Adenylate cyclase type 7	ADCY7	NaN	NaN	NaN	19.7533	NaN	NaN	19.1772	16.4846	18.218	19.2054	18.6341	2	2	2	5.5	5.5	5.5	48.086	0.0015997	3.1422	75600000	2
888	F5H4M0;Q9H9H4;F5H1F6	F5H4M0;Q9H9H4;F5H1F6	Vacuolar protein sorting-associated protein 37B	VPS37B	18.6865	18.1587	NaN	17.8179	18.1508	18.6188	19.8949	18.5598	18.767	19.9435	18.5138	2	2	2	15.9	15.9	15.9	29.693	0	14.295	77429000	13
889	F5H5D3;Q9BQE3;F8VVB9;F8VQQ4;F8VS66;F8VRZ4;F8VWV9;F8VX09;F8VRK0;F8W0F6;Q9H853;F8VXZ7;C9K0S6	F5H5D3;Q9BQE3	Tubulin alpha-1C chain	TUBA1C	29.941	28.5044	28.3365	28.5165	28.4007	29.6787	28.0945	27.3104	27.2585	27.8845	28.0919	25	25	2	64.2	64.2	7.9	57.73	0	323.31	147460000000	1651
890	H0Y8R1;F5H5I6;H0YAK1;Q12849-5;Q12849	H0Y8R1;F5H5I6;H0YAK1;Q12849-5;Q12849	G-rich sequence factor 1	GRSF1	19.3687	18.4886	18.7968	17.3581	18.7085	17.7411	NaN	17.2462	NaN	NaN	17.5558	4	4	4	14.4	14.4	14.4	47.27	0.00042608	3.9246	66594000	3
891	F5H5P2;P12694;P12694-2;F5GXU9;M0R0C8;H0YH31	F5H5P2;P12694;P12694-2;F5GXU9;M0R0C8	2-oxoisovalerate dehydrogenase subunit alpha, mitochondrial	BCKDHA	23.6752	23.0112	23.2332	22.1881	23.4024	21.1472	23.1528	23.0281	23.5776	21.8671	22.7642	12	12	12	38.4	38.4	38.4	54.202	0	171.77	2734700000	99
892	F5H5P4;Q96D37;P15498-2;P15498;H0YDG2;Q9UKW4-2;Q9UKW4;Q9UKW4-4	F5H5P4;Q96D37;P15498-2;P15498	Proto-oncogene vav	VAV1	14.3481	NaN	NaN	NaN	NaN	18.9033	17.1559	NaN	16.7848	14.8638	18.1	7	7	7	10.9	10.9	10.9	91.729	0	8.2334	148810000	7
893	F5H669;Q8N684-2;Q8N684;Q8N684-3;J3QT54;F5H6M0;F5H047;C9J286;C9J323;F5H5B7;F5H1W4;F5H2K8;F5H6P5;F5H6A8;F5GXA3;C9JM38	F5H669;Q8N684-2;Q8N684;Q8N684-3;J3QT54;F5H6M0;F5H047	Cleavage and polyadenylation specificity factor subunit 7	CPSF7	20.9323	22.192	22.5612	21.0573	22.6558	20.0761	19.9464	20.1908	20.7637	20.7196	20.1852	7	7	7	19.5	19.5	19.5	41.265	0	16.635	715110000	29
894	F5H6B2;Q9UHN6-2;Q9UHN6	F5H6B2;Q9UHN6-2;Q9UHN6	Transmembrane protein 2	TMEM2	NaN	17.4823	NaN	NaN	NaN	NaN	NaN	16.2675	17.5241	NaN	17.1814	2	2	2	4.5	4.5	4.5	64.725	0.0058315	2.4567	31097000	2
895	F5H6E2;O00159-3;O00159;O00159-2;I3L501;I3L204;I3L4D4;I3L3Y6;I3L168;I3L3F5;REV__J3QQM9;REV__J3QRJ1;REV__Q96FV2-2;REV__Q96FV2;REV__J3QL71;G3V342	F5H6E2;O00159-3;O00159;O00159-2	Unconventional myosin-Ic	MYO1C	24.3772	24.3209	23.7303	24.1225	24.0081	23.3063	23.8912	24.4728	24.1908	24.0967	24.3449	41	41	40	47.3	47.3	46.6	118.99	0	300.61	14929000000	433
896	F5H6I7	F5H6I7		ATL3	18.5748	17.8548	17.575	18.0465	16.904	NaN	18.5869	18.2418	18.5803	18.1727	18.2163	17	1	1	45.7	3.1	3.1	58.772	0	18.364	93404000	3
897	F8VNX4;F5H6T4;P26010-2;P26010	F8VNX4;F5H6T4;P26010-2;P26010	Integrin beta;Integrin beta-7	ITGB7	NaN	NaN	NaN	NaN	NaN	NaN	20.1356	NaN	19.0467	NaN	20.7348	1	1	1	8.9	8.9	8.9	17.54	0.0081346	2.272	41261000	1
898	F5H6U7;Q9Y3E0;G3V1U5;F5GWD8;F5GXH6	F5H6U7;Q9Y3E0;G3V1U5	Vesicle transport protein GOT1B	GOLT1B	20.9506	19.9985	21.8667	21.7092	22.8375	21.1258	22.5311	21.2738	21.895	21.7577	21.136	3	3	3	18.8	18.8	18.8	14.307	0	11.514	204150000	23
899	F5H6Z0;Q00537-2;Q00537;E5RGN0;A0A087WZU2;Q00536;Q00536-3;Q00536-2;F8W1S5;H0YBX5;F8VZY6;K7ELV5;F8VQZ9;E5RJM2;E5RIU6;K7EJ83;A0A087WZZ9;H0YAZ9;A0A087WY43;Q9BVE2;E7EUK8;A0A087X209;J3QSD7;P06493;Q00526;Q96Q40-2;Q96Q40-4;Q96Q40-3;O94921-3;Q96Q40-5;Q96Q40;O94921-2;O94921;Q9NYV4-3;Q14004-2;Q9NYV4-2;Q9NYV4;Q14004	F5H6Z0;Q00537-2;Q00537;E5RGN0;A0A087WZU2;Q00536;Q00536-3;Q00536-2	Cyclin-dependent kinase 17;Cyclin-dependent kinase 16	CDK17;CDK16	23.1184	19.7044	20.103	21.9703	20.6584	22.6681	22.5583	23.9431	20.5527	23.0041	16.9172	5	3	3	15.3	10.9	10.9	53.533	0.00041789	3.6569	2249900000	24
900	F5H702;Q96GC5-3;Q96GC5;F5H8D0	F5H702;Q96GC5-3;Q96GC5	39S ribosomal protein L48, mitochondrial	MRPL48	21.0787	21.7024	21.6812	20.8333	21.6216	NaN	22.7816	22.3546	22.2572	21.8152	22.1564	4	4	4	40.7	40.7	40.7	12.77	0	13.669	286270000	20
901	J3QS47;J3QRH5;J3KSL5;F5H757;P49447	J3QS47;J3QRH5;J3KSL5;F5H757;P49447	Cytochrome b561	CYB561	23.1989	21.0024	24.4964	21.976	24.9926	NaN	22.2104	22.9988	22.4165	22.5318	21.2661	2	2	2	11.3	11.3	11.3	24.68	0	42.654	611740000	11
902	F5H7Q6;Q9H1J7;F5H364	F5H7Q6;Q9H1J7;F5H364	Protein Wnt;Protein Wnt-5b	WNT5B	NaN	16.7345	20.5825	NaN	NaN	NaN	NaN	NaN	17.2994	NaN	NaN	3	2	2	15.7	11.4	11.4	28.224	0.0014124	3.2392	27608000	2
903	F5H7S7;Q13576;E7EWC2;Q13576-3;Q13576-2;D6R939;E9PDT6;D6RDK8;D6R999;D6RGC6	F5H7S7;Q13576;E7EWC2;Q13576-3;Q13576-2;D6R939	Ras GTPase-activating-like protein IQGAP2	IQGAP2	22.3039	24.5635	21.3734	24.102	21.2959	20.4517	22.3055	23.0727	23.2293	22.687	21.9285	50	48	48	41.2	40.2	40.2	174.45	0	323.31	8792300000	191
904	F5H8B0;P08709-2;P08709	F5H8B0;P08709-2;P08709	Coagulation factor VII;Factor VII light chain;Factor VII heavy chain	F7	NaN	NaN	NaN	NaN	19.6945	18.4433	NaN	NaN	NaN	NaN	NaN	2	2	2	8.6	8.6	8.6	41.879	0.0015905	3.0921	21688000	3
905	F5H8F7;Q9UBL3-3;Q9UBL3;H0YAQ0;H0YBF6;Q9UBL3-2	F5H8F7;Q9UBL3-3;Q9UBL3;H0YAQ0;H0YBF6;Q9UBL3-2	Set1/Ash2 histone methyltransferase complex subunit ASH2	ASH2L	16.6461	18.3736	18.7664	17.7582	18.6902	NaN	17.1603	17.372	16.6957	16.804	16.9533	2	2	2	6.1	6.1	6.1	55.324	0	6.068	85643000	11
906	I3L0H8;F6QDS0;H3BQK0;Q9UMR2-2;Q9UMR2-4;Q9NUU7;Q9UMR2;I3L352;Q9UMR2-3;Q9NUU7-2;H3BTB3;H3BMQ5;H3BN59	I3L0H8;F6QDS0;H3BQK0;Q9UMR2-2;Q9UMR2-4;Q9NUU7;Q9UMR2;I3L352;Q9UMR2-3;Q9NUU7-2	ATP-dependent RNA helicase DDX19B;ATP-dependent RNA helicase DDX19A	DDX19A;DDX19B	19.4632	20.1767	NaN	19.5974	19.9305	21.0772	18.3658	17.5245	NaN	NaN	18.4051	4	4	4	8.7	8.7	8.7	50.519	0	5.7607	270160000	7
907	F6RY50;Q96FS4	F6RY50;Q96FS4	Signal-induced proliferation-associated protein 1	SIPA1	21.4558	20.2959	21.4838	19.8649	21.4622	19.3891	21.6689	20.7387	NaN	20.6857	21.3508	3	3	3	3.5	3.5	3.5	101.82	0.0023631	2.958	1186500000	5
908	H0YFA9;H7C3P4;F6S8M0;P15586-2;P15586;F5H4C6	H0YFA9;H7C3P4;F6S8M0;P15586-2;P15586;F5H4C6	N-acetylglucosamine-6-sulfatase	GNS	NaN	18.8021	19.4441	18.9203	20.3099	NaN	NaN	NaN	NaN	17.2872	NaN	2	2	2	7.3	7.3	7.3	34.608	0.0042365	2.6973	40641000	2
909	F6SFZ6;Q99571-3;Q99571;Q99571-2;F5H1M6	F6SFZ6;Q99571-3;Q99571;Q99571-2	P2X purinoceptor;P2X purinoceptor 4	P2RX4	NaN	16.2213	19.7077	17.9836	20.1984	NaN	NaN	NaN	NaN	NaN	NaN	3	3	3	8.8	8.8	8.8	37.979	0	5.4591	76947000	3
910	Q5JY88;F6SL11;O95258-2;O95258;O95258-3	Q5JY88;F6SL11;O95258-2;O95258;O95258-3	Brain mitochondrial carrier protein 1	SLC25A14	NaN	NaN	21.7004	NaN	18.0168	NaN	NaN	NaN	NaN	NaN	NaN	2	2	2	14.1	14.1	14.1	21.912	0	5.2003	36729000	2
911	F6SYF8;Q9UBP4;E9PKW6;E9PKK9;E9PHY3	F6SYF8;Q9UBP4;E9PKW6	Dickkopf-related protein 3	DKK3	18.8051	18.4322	18.7994	18.5183	21.805	18.2041	NaN	NaN	NaN	NaN	NaN	4	4	4	18.1	18.1	18.1	39.95	0	17.986	124400000	9
912	F6T1Q0;Q6L8Q7-2;Q6L8Q7	F6T1Q0;Q6L8Q7-2;Q6L8Q7	2,5-phosphodiesterase 12	PDE12	20.1019	19.6607	20.7923	19.7613	21.2914	19.2508	17.6386	18.8303	18.0364	NaN	17.7462	6	6	6	20.3	20.3	20.3	52.175	0	15.413	235140000	13
913	F8WCX5;F6VRR5;Q9BY77;Q6R954;F8WEE2;Q8WUT1;Q9BY77-2	F8WCX5;F6VRR5;Q9BY77;Q6R954;F8WEE2;Q8WUT1;Q9BY77-2	Polymerase delta-interacting protein 3	POLDIP3;PDIP46	17.8019	NaN	20.2306	24.0797	19.6582	NaN	25.0367	24.9449	24.3259	24.9183	24.8042	4	4	4	18.5	18.5	18.5	30.769	0	8.4179	3211300000	10
914	F6WFU6;Q9NZJ7-2;Q9NZJ7;H0Y8C3;Q5TDC2;Q9NZJ7-3;H7C196	F6WFU6;Q9NZJ7-2;Q9NZJ7;H0Y8C3;Q5TDC2	Mitochondrial carrier homolog 1	MTCH1	25.1076	24.2912	25.7768	23.443	25.204	23.9586	23.8361	24.5043	23.9533	23.0203	24.5279	12	12	12	35.5	35.5	35.5	39.97	0	43.273	4306200000	94
915	F6WQW2;P43487-2;P43487;C9JXG8;C9JJ34;C9JGV6;C9JDM3	F6WQW2;P43487-2;P43487;C9JXG8;C9JJ34;C9JGV6	Ran-specific GTPase-activating protein	RANBP1	20.7711	19.3871	19.463	20.2137	20.9295	20.9187	18.9606	17.4506	NaN	18.7858	18.8061	3	3	3	15.5	15.5	15.5	31.904	0	5.5622	169960000	8
916	F6WST4;Q9P0S3;Q53FV1;J3KTF9;F8VXD5	F6WST4;Q9P0S3;Q53FV1;J3KTF9;F8VXD5	ORM1-like protein 1;ORM1-like protein 2	ORMDL1;ORMDL2;ORMDL3	22.5927	21.2585	22.4735	22.0437	22.2808	21.5426	21.6361	22.3318	21.2214	20.8588	22.0309	2	1	1	23.9	13.8	13.8	12.27	0	11.667	186230000	12
917	F6X2W2;Q7Z3B1;Q7Z3B1-2	F6X2W2;Q7Z3B1;Q7Z3B1-2	Neuronal growth regulator 1	NEGR1	23.1267	NaN	21.7092	18.4026	22.4857	21.4322	NaN	NaN	NaN	17.7241	NaN	3	3	3	19.1	19.1	19.1	32.85	0	29.533	399160000	9
918	F6XEV2;Q9BPX6-2;Q9BPX6;Q9BPX6-3;S4R3D7;S4R3V1;E9PQV6;Q9BPX6-5;Q9BPX6-4;S4R3W3	F6XEV2;Q9BPX6-2;Q9BPX6;Q9BPX6-3;S4R3D7;S4R3V1;E9PQV6;Q9BPX6-5;Q9BPX6-4	Calcium uptake protein 1, mitochondrial	MICU1	18.5775	NaN	16.7433	NaN	NaN	NaN	NaN	16.6802	18.7657	19.4238	17.2297	4	4	4	12.1	12.1	12.1	54.578	0	6.807	59167000	9
919	F6XSS0;P18577-9;P18577;E7EQ47;P18577-4;P18577-10;P18577-11;Q02161;Q5VSJ9;Q5VSJ8;E7EU00;E7EMF2;P18577-14;P18577-8;P18577-7;P18577-2;P18577-5;P18577-6	F6XSS0;P18577-9;P18577;E7EQ47;P18577-4;P18577-10;P18577-11;Q02161	Blood group Rh(CE) polypeptide;Blood group Rh(D) polypeptide	RHCE;RHD	22.0902	19.0635	18.0201	19.2915	19.894	19.854	NaN	19.1752	18.6586	NaN	19.5666	3	3	3	9	9	9	43.931	0.0063599	2.4026	183860000	6
920	F6XZD3;Q8N283	F6XZD3;Q8N283	Ankyrin repeat domain-containing protein 35	ANKRD35	NaN	19.4014	18.4946	NaN	19.8543	22.2278	NaN	NaN	NaN	NaN	NaN	7	6	6	7.6	6.9	6.9	100.33	0	11.418	415270000	6
921	F8VNP4;P58166	F8VNP4;P58166	Inhibin beta E chain	INHBE	16.7881	15.8145	21.6388	16.375	16.8768	15.458	NaN	NaN	15.576	NaN	NaN	3	3	3	20.1	20.1	20.1	30.432	0	8.1247	49624000	3
922	F8VP71;F8VVQ3;F8VZA2;Q6P1Q0-4;Q6P1Q0-2;Q6P1Q0;Q6P1Q0-7;H0YIV5;F8VS60;F8W0R0;H0YHF4;F8VR33;F8VPY5;F8W1Z2;Q6P1Q0-5	F8VP71;F8VVQ3;F8VZA2;Q6P1Q0-4;Q6P1Q0-2;Q6P1Q0;Q6P1Q0-7	LETM1 domain-containing protein 1	LETMD1	20.9965	19.9048	21.8405	19.6183	21.2226	18.4993	20.9843	20.6809	21.5218	20.0791	20.0579	5	5	5	22.2	22.2	22.2	27.746	0	8.8575	321090000	15
923	F8VPD4;P27708;H7C2E4;H7BZB3;H7C3Z5	F8VPD4;P27708	CAD protein;Glutamine-dependent carbamoyl-phosphate synthase;Aspartate carbamoyltransferase;Dihydroorotase	CAD	20.5076	21.6041	20.4723	20.9592	20.2946	19.4982	19.8526	18.9049	18.0638	19.65	18.5363	28	28	28	17	17	17	236.02	0	89.153	1642600000	83
924	F8VQW0;F8VX73;F8VPI1;F8W201;F8W086;F8VR05;F8VQQ5;F8VSI7;F8VVJ4;P55061;P55061-2;F8W1G3	F8VQW0;F8VX73;F8VPI1;F8W201;F8W086;F8VR05;F8VQQ5;F8VSI7;F8VVJ4;P55061;P55061-2;F8W1G3	Bax inhibitor 1	TMBIM6	25.5084	22.679	20.1722	21.568	25.2786	23.6734	23.9374	23.2787	21.4333	NaN	25.0538	2	2	2	51.2	51.2	51.2	4.7756	0	33.961	750850000	11
925	F8VQD9;Q9BSB4	F8VQD9;Q9BSB4	Autophagy-related protein 101	ATG101	NaN	NaN	NaN	NaN	NaN	NaN	NaN	NaN	NaN	NaN	NaN	1	1	1	8.4	8.4	8.4	21.926	0.008473	2.2367	0	1
926	F8VQQ3;Q9HB07;F8VR84;H3BPH3	F8VQQ3;Q9HB07;F8VR84	UPF0160 protein MYG1, mitochondrial	C12orf10	NaN	19.9476	19.9464	19.9314	19.7911	21.7164	19.5462	18.8258	18.3945	19.3202	17.2443	5	5	5	15.9	15.9	15.9	33.819	0	19.698	224460000	18
927	F8VQR7;Q16527;F8VW96	F8VQR7;Q16527;F8VW96	Cysteine and glycine-rich protein 2	CSRP2	21.5592	20.9662	NaN	22.5724	21.3892	20.0483	19.8438	NaN	18.6945	NaN	NaN	4	4	4	31.6	31.6	31.6	20.677	0	13.423	232000000	5
928	F8VS61	F8VS61		KRT77	23.5838	24.5207	21.4793	23.4223	19.161	NaN	23.7408	23.5948	24.3001	24.3486	23.7068	5	1	1	23.8	3.2	3.2	25.378	0.0015974	3.1346	1605500000	5
929	F8VW54;F8VS78;F8VWE0;Q12999	F8VW54;F8VS78;F8VWE0;Q12999	Tetraspanin-31	TSPAN31	NaN	NaN	NaN	NaN	NaN	19.0912	20.4459	19.7956	20.2342	19.7192	NaN	1	1	1	14	14	14	9.9004	0.0023622	2.9564	19974000	3
930	F8VSC5;Q6P3W7;H0YI32;H0YIK6	F8VSC5;Q6P3W7	SCY1-like protein 2	SCYL2	18.3731	17.901	19.084	17.1232	19.4487	17.8131	18.6952	18.59	17.8604	18.7996	19.4512	3	3	3	6	6	6	77.053	0	6.2298	199280000	16
931	F8VSL3;P25208	F8VSL3;P25208	Nuclear transcription factor Y subunit beta	NFYB	NaN	NaN	20.6281	NaN	19.0511	NaN	NaN	NaN	NaN	NaN	NaN	1	1	1	9.9	9.9	9.9	14.548	0.0015936	3.1159	21638000	0
932	F8VU90;Q9NYL4-2;Q9NYL4;H0YHM7;E9PAR0	F8VU90;Q9NYL4-2;Q9NYL4	Peptidyl-prolyl cis-trans isomerase;Peptidyl-prolyl cis-trans isomerase FKBP11	FKBP11	24.0231	22.3972	26.0654	22.3124	25.3817	21.6764	24.5934	23.8822	23.1778	23.3144	23.9525	5	5	5	25.8	25.8	25.8	19.814	0	31.635	2562900000	55
933	F8VUA2;F8VVT7;Q9HD42	F8VUA2;F8VVT7;Q9HD42	Charged multivesicular body protein 1a	CHMP1A	18.7159	22.2908	21.1983	21.525	17.9643	21.3226	17.3743	21.0609	21.2652	21.852	20.0013	2	2	2	9.4	9.4	9.4	19.531	0.00042159	3.7872	263910000	4
934	F8VV56;F8W022;F8VWK8;P08962-3;P08962-2;P08962;F8VNT9	F8VV56;F8W022;F8VWK8;P08962-3;P08962-2;P08962;F8VNT9	Tetraspanin;CD63 antigen	CD63	24.6504	22.9979	26.2947	24.22	26.9174	24.3546	24.7371	23.7423	24.1945	23.904	23.8486	3	3	3	16.6	16.6	16.6	16.021	0	24.813	4939100000	45
935	F8VV64;Q63HR2-6;Q63HR2;Q63HR2-4;Q63HR2-2;Q63HR2-5	F8VV64;Q63HR2-6;Q63HR2;Q63HR2-4;Q63HR2-2;Q63HR2-5	Tensin-2	TNS2	16.5122	18.4279	21.6089	18.1677	21.2332	21.3401	NaN	16.2381	NaN	15.1311	16.5563	19	19	18	20.5	20.5	19.6	145.98	0	57.014	750220000	31
936	F8VVA7;P61923;F8W651;P61923-4;F8VYK5;F8VXB1;F8VUC5;F8W156;F8VYZ4;P61923-2;P61923-3;P61923-5;F8VXR1	F8VVA7;P61923;F8W651;P61923-4;F8VYK5;F8VXB1;F8VUC5;F8W156;F8VYZ4;P61923-2;P61923-3;P61923-5	Coatomer subunit zeta-1	COPZ1	20.0175	21.9524	22.7897	21.8736	22.7208	NaN	21.7289	19.3361	NaN	20.9848	19.4331	4	4	4	23.7	23.7	23.7	22.34	0	17.545	210320000	15
937	F8W1A2;F8VVB6;Q99435-4;Q99435;Q99435-2;Q99435-3;F8VZ72	F8W1A2;F8VVB6;Q99435-4;Q99435;Q99435-2;Q99435-3;F8VZ72	Protein kinase C-binding protein NELL2	NELL2	NaN	17.7199	19.5156	NaN	19.536	NaN	NaN	NaN	NaN	NaN	NaN	2	2	2	9.3	9.3	9.3	36.417	0.001226	3.3869	27609000	1
938	F8VVL1;O43583	F8VVL1;O43583	Density-regulated protein	DENR	NaN	20.0148	NaN	19.5562	18.6824	NaN	NaN	NaN	NaN	NaN	NaN	1	1	1	11.9	11.9	11.9	17.77	0.0012285	3.41	18008000	2
939	F8VWL0;Q12800-2;Q12800-3;Q12800-4;Q12800;F8VX55	F8VWL0;Q12800-2;Q12800-3;Q12800-4;Q12800	Alpha-globin transcription factor CP2	TFCP2	18.5449	19.1222	20.1998	20.7621	20.2775	20.2943	19.7309	20.5498	18.4485	19.1666	19.4868	4	4	4	12.6	12.6	12.6	43.933	0	6.2403	199840000	21
940	J3KPF0;F8VWT9;Q9Y4D8-4;Q9Y4D8;Q9Y4D8-2;V9GYT9	J3KPF0;F8VWT9;Q9Y4D8-4;Q9Y4D8;Q9Y4D8-2	Probable E3 ubiquitin-protein ligase HECTD4	HECTD4	13.013	16.2947	16.6051	15.3951	17.7023	NaN	15.3185	NaN	NaN	13.9897	NaN	4	4	4	1.2	1.2	1.2	468.65	0	5.5992	107890000	6
941	R4GNG3;F8WAK2;F8VXI9;Q14161-9;Q14161-10;Q14161-8;Q14161-4;Q14161-5;Q14161-3;Q14161;F8W822;Q14161-2;Q14161-11;Q14161-7;Q14161-6	R4GNG3;F8WAK2;F8VXI9;Q14161-9;Q14161-10;Q14161-8;Q14161-4;Q14161-5;Q14161-3;Q14161;F8W822;Q14161-2;Q14161-11;Q14161-7;Q14161-6	ARF GTPase-activating protein GIT2	GIT2	NaN	16.6203	NaN	16.9647	16.9243	18.6849	NaN	NaN	NaN	NaN	17.3203	4	2	2	7	3.3	3.3	71.504	0.00022356	4.5685	47960000	1
942	F8VXU5;Q9UBQ0;Q9UBQ0-2;Q05DG7	F8VXU5;Q9UBQ0;Q9UBQ0-2	Vacuolar protein sorting-associated protein 29	VPS29	23.4615	24.1201	23.7744	24.0124	23.4917	23.5121	24.2217	20.6754	23.4958	24.6311	21.8265	4	4	4	21	21	21	23.98	0	13.971	1883700000	34
943	F8VYE8;P36873;P36873-2;F8VR82;F8W0W8;A0A087WYY5	F8VYE8;P36873;P36873-2;F8VR82;F8W0W8;A0A087WYY5	Serine/threonine-protein phosphatase;Serine/threonine-protein phosphatase PP1-gamma catalytic subunit	PPP1CC	19.1929	18.7998	21.1269	19.5904	21.5171	22.8048	NaN	NaN	19.4867	NaN	17.9811	15	3	3	52.3	7.9	7.9	34.95	0	9.2201	262760000	8
944	F8VYK9;P24592	F8VYK9;P24592	Insulin-like growth factor-binding protein 6	IGFBP6	NaN	20.2453	18.7512	22.747	17.9075	NaN	NaN	NaN	NaN	NaN	NaN	1	1	1	3.8	3.8	3.8	25.152	0.0084652	2.2217	116600000	2
945	F8VYN9;P40616-2;P40616;F8VP63;B4DZG7;F8VP99;A6NH57	F8VYN9;P40616-2;P40616	ADP-ribosylation factor-like protein 1	ARL1	22.8047	21.836	23.9508	23.1823	23.698	23.7736	22.4298	22.4586	21.8754	23.4347	22.8101	5	5	5	32.5	32.5	32.5	21.778	0	10.885	1158200000	71
946	F8VYY9;P54619-2;P54619;P54619-3;H0YHF8;H0YIC9;F8VPF5;F8VVA3;F8VZX1;F8VRY2;F8VSL2;E9PGP6;Q9UGJ0-2;Q9UGJ0-3;Q9UGJ0	F8VYY9;P54619-2;P54619;P54619-3;H0YHF8;H0YIC9	5-AMP-activated protein kinase subunit gamma-1	PRKAG1	21.8966	21.8001	22.0518	21.2087	20.9603	22.8577	20.847	21.8404	21.1972	21.6431	21.2963	8	8	8	34.3	34.3	34.3	31.905	0	25.307	841420000	28
947	F8VYZ3;Q96GA7;H0YID3;H0YIA2	F8VYZ3;Q96GA7;H0YID3	Serine dehydratase-like	SDSL	NaN	NaN	21.3013	NaN	21.2943	22.6922	18.7229	NaN	NaN	NaN	NaN	3	3	3	24.4	24.4	24.4	17.845	0	10.598	104210000	6
948	F8VZZ0;F8VZ51;P11802;F8VXD2;F8VYH9;F8VTV8;F8VWX7;P11802-2;F8W1L8	F8VZZ0;F8VZ51;P11802;F8VXD2;F8VYH9;F8VTV8;F8VWX7;P11802-2	Cyclin-dependent kinase 4	CDK4	NaN	NaN	NaN	NaN	NaN	21.8238	NaN	NaN	NaN	NaN	NaN	4	3	3	25.8	21.5	21.5	20.959	0	7.1291	44546000	2
949	F8W031;F8VXJ7;Q9Y2B0;F8W1K5;F8VP03;H0YIH9;F8W1U5;Q9Y2B0-2;H0YI18	F8W031;F8VXJ7;Q9Y2B0;F8W1K5	Protein canopy homolog 2	CNPY2	20.804	21.1552	23.3063	20.6275	23.3574	20.0125	21.6393	21.1939	20.0655	21.8081	20.3522	7	6	6	32.7	29.3	29.3	29.224	0	34.957	749790000	39
950	F8W038;F8W1H0;H0YIS7;Q8IXM2-2;Q8IXM2;Q8IXM2-3	F8W038;F8W1H0;H0YIS7;Q8IXM2-2;Q8IXM2;Q8IXM2-3	Chromatin complexes subunit BAP18	C17orf49;RNASEK-C17orf49;BAP18	NaN	21.7738	NaN	21.2414	NaN	NaN	NaN	NaN	19.2869	20.4626	20.022	3	3	3	28.7	28.7	28.7	16.29	0.00022277	4.5349	82926000	6
951	F8W150;S4R3U2;H0YIN8;Q6ZTN6-2;Q6ZTN6;Q8IZ07;Q6ZTN6-3	F8W150;S4R3U2;H0YIN8;Q6ZTN6-2;Q6ZTN6;Q8IZ07;Q6ZTN6-3	Ankyrin repeat domain-containing protein 13D;Ankyrin repeat domain-containing protein 13A	ANKRD13A;ANKRD13D	20.1964	NaN	19.7938	NaN	17.7624	19.7615	19.3364	19.917	19.5722	19.8056	19.0966	1	1	1	14.5	14.5	14.5	9.3785	0.0058216	2.4453	33895000	8
952	F8W1A4;P54819-2;P54819;P54819-5;P54819-3;F8VY04;P54819-6;F8VZG5;P54819-4;G3V213;F8VPP1	F8W1A4;P54819-2;P54819;P54819-5;P54819-3;F8VY04;P54819-6;F8VZG5;P54819-4;G3V213	Adenylate kinase 2, mitochondrial;Adenylate kinase 2, mitochondrial;Adenylate kinase 2, mitochondrial, N-terminally processed	AK2	26.204	25.7666	24.108	25.9895	24.5527	24.0416	26.4958	25.6919	26.8162	26.428	26.5452	14	14	14	75.4	75.4	75.4	25.63	0	199.07	11669000000	164
953	F8W6G1;Q9UHY1	F8W6G1;Q9UHY1	Nuclear receptor-binding protein	NRBP1	NaN	NaN	19.7011	NaN	18.7308	16.4525	18.5513	15.8452	18.0372	17.9921	17.7425	3	3	3	8.1	8.1	8.1	60.829	0.00021395	3.99	60393000	10
954	F8W6I7;P09651-3;P09651-2;P09651;F8VZ49;Q32P51;F8VTQ5;F8W646;F8VYN5;H0YH80	F8W6I7;P09651-3;P09651-2;P09651;F8VZ49;Q32P51;F8VTQ5;F8W646	Heterogeneous nuclear ribonucleoprotein A1;Heterogeneous nuclear ribonucleoprotein A1, N-terminally processed;Heterogeneous nuclear ribonucleoprotein A1-like 2	HNRNPA1;HNRNPA1L2	26.3257	27.6484	25.9686	26.8546	26.9824	24.4089	25.5148	26.1619	24.5722	26.131	24.6996	13	12	12	47.2	47.2	47.2	33.155	0	215.8	16334000000	277
955	F8W6J8;Q8IW40	F8W6J8;Q8IW40	Coiled-coil domain-containing protein 103	CCDC103	NaN	NaN	NaN	NaN	NaN	20.3141	NaN	NaN	NaN	NaN	NaN	1	1	1	5.5	5.5	5.5	26.544	0.0012267	3.3919	19554000	1
956	F8W726;Q14157-4;Q14157-1;Q14157-3;Q14157;Q14157-5;Q5VU77;H0Y5H6;H7C2T8	F8W726;Q14157-4;Q14157-1;Q14157-3;Q14157;Q14157-5	Ubiquitin-associated protein 2-like	UBAP2L	17.729	18.1644	19.2853	17.6842	18.9556	15.1462	19.8654	20.1735	17.2639	17.5995	20.505	4	4	4	5.5	5.5	5.5	113.63	0	8.8092	186210000	20
957	F8W733;Q9NXR7-4;Q9NXR7-3;Q9NXR7;Q9NXR7-1	F8W733;Q9NXR7-4;Q9NXR7-3;Q9NXR7;Q9NXR7-1	BRCA1-A complex subunit BRE	BRE	19.7979	19.4013	19.7116	NaN	19.9261	20.0289	20.5255	NaN	19.5861	NaN	NaN	2	2	2	7	7	7	31.972	0.0010292	3.4697	97044000	3
958	F8W785;O00461	F8W785;O00461	Golgi integral membrane protein 4	GOLIM4	21.3694	19.2858	21.1075	19.9173	21.021	19.7408	21.2675	21.4754	20.6665	21.1782	21.3204	8	8	8	13.2	13.2	13.2	78.759	0	68.889	1044300000	29
959	F8W7C6;A0A087WV22;H7C123;H7C2C5;H7C2U2	F8W7C6;A0A087WV22;H7C123;H7C2C5		RPL10	NaN	NaN	NaN	NaN	NaN	NaN	NaN	NaN	NaN	NaN	NaN	11	1	1	58.9	11	11	18.565	0	8.339	0	2
960	F8W7L6;P42262-4;P42262-2;P42262;P42262-3	F8W7L6;P42262-4;P42262-2;P42262;P42262-3	Glutamate receptor 2	GRIA2	18.4017	NaN	18.7534	NaN	19.7243	NaN	NaN	NaN	NaN	NaN	NaN	4	4	4	8.9	8.9	8.9	82.108	0	12.461	71139000	4
961	F8W7Q4;Q96A26;E9PH05	F8W7Q4;Q96A26;E9PH05	Protein FAM162A	FAM162A	26.7772	25.6631	26.1267	26.5759	25.9176	25.5691	26.9349	26.6874	27.4128	25.7892	26.7984	5	5	5	32.6	32.6	32.6	16.515	0	120.42	9771800000	74
962	F8W7W8;Q30201-2;Q30201-8;Q30201-5;Q30201;Q6B0J5;Q30201-6;Q30201-4;Q30201-7;Q30201-3	F8W7W8;Q30201-2;Q30201-8;Q30201-5;Q30201	Hereditary hemochromatosis protein	HFE	19.8688	19.575	18.4383	17.2364	NaN	19.9529	19.7502	20.0031	17.3249	18.9514	19.9655	3	3	3	11.6	11.6	11.6	38.871	0	9.7899	113650000	4
963	F8W881;Q9NX05;Q9NX05-2	F8W881;Q9NX05	Constitutive coactivator of PPAR-gamma-like protein 2	FAM120C	19.1373	17.8323	20.5897	18.084	20.8982	21.5228	NaN	17.2358	14.713	NaN	17.1865	15	13	13	19.7	17.2	17.2	99.351	0	64.732	323430000	23
964	F8W8D8;P13797-3;P13797-2;P13797;U3KQI3;H7C4N2	F8W8D8;P13797-3;P13797-2;P13797	Plastin-3	PLS3	22.1692	22.55	19.7622	23.6608	19.2532	19.7565	23.6353	22.6074	22.9632	23.693	21.6607	22	16	14	44.9	34.3	30	66.636	0	96.452	2724600000	85
965	F8W8M4;Q5T6N4;O14639-2;O14639-6;O14639;J3QSX6;Q5JVV3;O14639-4;O14639-3;O14639-5;H0Y3K7;H0Y7N6;F6XFR5	F8W8M4;Q5T6N4;O14639-2;O14639-6;O14639;J3QSX6;Q5JVV3;O14639-4;O14639-3;O14639-5;H0Y3K7	Actin-binding LIM protein 1	ABLIM1	21.3259	20.8557	19.5072	20.0442	18.8329	21.0151	17.7239	19.9235	18.7173	18.5286	18.9819	8	8	8	14.8	14.8	14.8	81.104	0	15.137	623740000	17
966	J3KQ45;F8W8W7;O43493-6;O43493-4;O43493-2;O43493-5;O43493-3;O43493	J3KQ45;F8W8W7;O43493-6;O43493-4;O43493-2;O43493-5;O43493-3;O43493	Trans-Golgi network integral membrane protein 2	TGOLN2	18.6489	NaN	19.5123	NaN	19.4001	NaN	17.0142	18.7417	16.1025	17.7094	17.9149	2	2	2	5.1	5.1	5.1	47.879	0	5.4352	100820000	3
967	F8W930;Q9Y6M1-1;Q9Y6M1;Q9Y6M1-5;Q9Y6M1-6;Q9Y6M1-3;Q9Y6M1-4;O00425-2;Q9NZI8-2;Q9NZI8	F8W930;Q9Y6M1-1;Q9Y6M1;Q9Y6M1-5;Q9Y6M1-6;Q9Y6M1-3;Q9Y6M1-4	Insulin-like growth factor 2 mRNA-binding protein 2	IGF2BP2	21.5047	22.962	20.4053	21.7869	20.1547	21.5232	21.6356	21.9833	20.381	22.5841	21.8652	14	14	13	30.7	30.7	28.6	66.785	0	66.075	1368300000	50
968	F8W943;P04424-2;P04424	F8W943;P04424-2;P04424	Argininosuccinate lyase	ASL	NaN	NaN	18.7241	18.636	18.5994	18.9969	NaN	NaN	NaN	NaN	NaN	1	1	1	8.3	8.3	8.3	27.379	0	11.814	23741000	3
969	F8W9Q8;G3V426;Q86TW2-3;Q86TW2-2;Q86TW2	F8W9Q8;G3V426;Q86TW2-3;Q86TW2-2;Q86TW2	Uncharacterized aarF domain-containing protein kinase 1	ADCK1	18.3561	17.1151	17.9725	17.3237	NaN	NaN	18.3911	16.9592	18.5428	18.3659	18.0999	1	1	1	6	6	6	24.776	0.005292	2.5227	35580000	4
970	F8W9S7;Q14C86-3;Q14C86-4;Q14C86-5;Q14C86-2;Q14C86;Q14C86-6;B0QZ65;B4DGD8;C9IZ08;H0Y4E7;H0Y7I9	F8W9S7;Q14C86-3;Q14C86-4;Q14C86-5;Q14C86-2;Q14C86;Q14C86-6	GTPase-activating protein and VPS9 domain-containing protein 1	GAPVD1	18.8115	18.5763	19.2311	18.5675	19.5266	18.1032	19.9763	NaN	18.9707	18.4935	18.9127	7	7	7	5.7	5.7	5.7	157.46	0	21.478	408740000	9
971	F8W9T3;O95219;O95219-2	F8W9T3;O95219;O95219-2	Sorting nexin-4	SNX4	18.2605	18.3079	18.526	17.1684	18.5532	19.673	18.843	18.0151	18.6665	18.2733	18.3262	2	2	2	11	11	11	18.564	0.0084746	2.2369	54401000	11
972	F8W9Y0;Q13277-2;Q13277-3;Q13277	F8W9Y0;Q13277-2;Q13277-3;Q13277	Syntaxin-3	STX3	18.4689	18.14	20.0031	17.8413	20.7181	NaN	19.4932	19.2948	19.4051	19.564	19.4291	1	1	1	5.4	5.4	5.4	29.636	0.0031104	2.8208	114590000	1
973	Q8NEC6;F8WA39;Q13613-2;Q13613;H0YDX3;H7BZJ1;H7C406;E9PPP8	Q8NEC6;F8WA39;Q13613-2;Q13613;H0YDX3	Myotubularin-related protein 1	MTMR1	19.3033	18.3884	NaN	17.6266	NaN	18.0408	17.5938	19.4905	18.7849	18.772	19.087	3	3	2	11.6	11.6	9.1	39.822	0	4.9282	84760000	7
974	J3QRU4;F8WCA0;L7N2F9;P63027;K7ENK9;K7EKX0;F5GZV7;P23763-2;P23763-3;P23763	J3QRU4;F8WCA0;L7N2F9;P63027;K7ENK9;K7EKX0	Vesicle-associated membrane protein 2	VAMP2;VAMP3	26.6632	24.7081	26.9416	21.5332	27.2597	23.7207	24.7206	24.3693	24.1278	24.2679	24.4873	6	6	3	61.9	61.9	40.7	12.251	0	237.01	3031400000	84
975	F8WCF6;P59998;P59998-3;F8WDD7;P59998-2;H7C0A3;R4GN08;P59998-4;F8WDW3;F8WE39	F8WCF6;P59998;P59998-3;F8WDD7;P59998-2;H7C0A3	Actin-related protein 2/3 complex subunit 4	ARPC4-TTLL3;ARPC4	25.1563	24.3884	23.7739	24.552	23.5256	24.6781	25.3998	24.5784	24.9613	25.3344	24.4156	7	7	7	50.3	50.3	50.3	21.058	0	25.614	5053600000	128
976	F8WEX7;F8WF14;P06276	F8WEX7;F8WF14;P06276	Carboxylic ester hydrolase;Cholinesterase	BCHE	NaN	NaN	NaN	NaN	NaN	19.3719	NaN	NaN	NaN	15.3485	NaN	2	2	2	6.1	6.1	6.1	58.926	0	5.4632	22031000	2
977	F8WF48;Q99442;F8WCJ7	F8WF48;Q99442;F8WCJ7	Translocation protein SEC62	SEC62	24.0331	23.6422	23.721	21.3751	24.5072	22.3947	22.7245	22.5419	22.7608	23.5491	23.9878	6	6	6	56.5	56.5	56.5	9.8703	0	17.819	1059100000	27
978	F8WJN3;Q16630-3;Q16630;Q16630-2;F8W084	F8WJN3;Q16630-3;Q16630;Q16630-2	Cleavage and polyadenylation specificity factor subunit 6	CPSF6	NaN	23.1439	23.1701	21.5739	23.3893	NaN	19.8312	18.6018	NaN	20.3863	18.8404	8	8	8	19.7	19.7	19.7	52.269	0	28.747	719730000	22
979	G0XQ39;Q13586;E9PNJ4;Q13586-2;H0YDB2;E9PIQ8;E9PRZ7;E9PR09;E9PN27;E9PRE4;E9PR07;E9PJ19;E9PMB4	G0XQ39;Q13586;E9PNJ4;Q13586-2;H0YDB2	Stromal interaction molecule 1	STIM1	22.7686	21.8217	21.9774	22.356	22.5509	22.1352	22.5938	22.9824	22.9381	22.0563	22.4118	13	13	13	19.2	19.2	19.2	88.645	0	32.395	2704300000	71
980	G3V0I5;P49821-2;P49821;B4DE93;E9PQP1;E9PPR0;E9PLC6;E9PJL9;H0YE81;E9PPS5;H0YD04;E9PPD6	G3V0I5;P49821-2;P49821;B4DE93	NADH dehydrogenase [ubiquinone] flavoprotein 1, mitochondrial	NDUFV1	25.5107	24.5663	24.9629	24.7508	25.5227	23.9115	24.9852	25.473	25.3702	24.8584	23.9732	21	21	12	60.8	60.8	38.7	50.054	0	160.23	11077000000	219
981	G3V169;P29466-2;P29466;P29466-4;P29466-3;B4DVD8;H0YEC7;P29466-5;E9PQW1;Q5FBZ0;Q5EG05-2;Q5EG05	G3V169;P29466-2;P29466;P29466-4;P29466-3;B4DVD8;H0YEC7	Caspase;Caspase-1;Caspase-1 subunit p20;Caspase-1 subunit p10	CASP1	18.5004	19.0247	NaN	18.165	17.8517	19.2553	19.1549	19.253	23.9715	20.0031	19.9238	6	6	6	18.3	18.3	18.3	40.943	0	7.6222	477580000	10
982	G3V1D3;G3V180;Q9NY33-4;Q9NY33;E9PQ14;E9PNX5;E9PKK8;E9PPK9;Q9NY33-2	G3V1D3;G3V180;Q9NY33-4;Q9NY33;E9PQ14	Dipeptidyl peptidase 3	DPP3	19.3864	19.9525	19.1832	20.0546	19.6974	18.8852	19.2761	16.4711	17.7041	20.3382	16.3864	5	5	5	11.2	11.2	11.2	84.304	0	26.143	303970000	7
983	G3V198;Q12769;E9PR16;Q12769-3	G3V198;Q12769;E9PR16	Nuclear pore complex protein Nup160	NUP160	18.0103	19.8862	20.638	18.8141	21.1709	16.5854	18.1758	18.1332	18.1614	17.6243	18.4201	14	14	14	13.8	13.8	13.8	148.86	0	27.959	475780000	47
984	G3V1C3;Q9BZZ5-2;Q9BZZ5;Q9BZZ5-3;B4E283;Q9BZZ5-1;Q9BZZ5-5;H0YER7;E9PQK6	G3V1C3;Q9BZZ5-2;Q9BZZ5;Q9BZZ5-3;B4E283;Q9BZZ5-1;Q9BZZ5-5;H0YER7	Apoptosis inhibitor 5	API5	18.7811	21.5386	22.0795	21.2564	22.4144	19.0461	20.8568	19.6748	19.6481	20.4529	19.9927	8	8	8	17.3	17.3	17.3	57.56	0	31.964	793080000	29
985	G3V1L6;Q9BQL6;Q9BQL6-4;Q9BQL6-2;Q9BQL6-3	G3V1L6;Q9BQL6;Q9BQL6-4;Q9BQL6-2	Fermitin family homolog 1	FERMT1	NaN	20.3124	NaN	20.245	NaN	16.1374	19.469	NaN	NaN	20.7074	NaN	6	5	5	19	16.7	16.7	48.295	0	12.183	116260000	5
986	G3V1P3;Q969J3;Q969J3-2	G3V1P3;Q969J3;Q969J3-2	Loss of heterozygosity 12 chromosomal region 1 protein	LOH12CR1	NaN	18.5006	19.7338	NaN	20.1124	NaN	NaN	NaN	NaN	NaN	NaN	2	2	2	15.3	15.3	15.3	20.247	0	7.3489	30892000	1
987	G3V1P5;Q96RN5-3;Q96RN5-2;Q96RN5	G3V1P5;Q96RN5-3;Q96RN5-2;Q96RN5	Mediator of RNA polymerase II transcription subunit 15	MED15	NaN	NaN	18.7607	17.237	18.517	NaN	NaN	16.7785	NaN	NaN	NaN	1	1	1	3	3	3	79.599	0.0084715	2.2359	20637000	0
988	G3V1R2;Q8WWV3-3;Q8WWV3;Q8WWV3-2	G3V1R2;Q8WWV3-3;Q8WWV3;Q8WWV3-2	Reticulon-4-interacting protein 1, mitochondrial	RTN4IP1	20.0591	NaN	NaN	NaN	19.6417	18.7775	NaN	19.903	17.8169	17.8274	NaN	2	2	2	10.6	10.6	10.6	25.035	0.00042052	3.7457	53252000	2
989	G3V200;O75334-2;O75334-4;O75334-3;O75334;O75334-6;O75334-5;F8VWR9;E9PPF6;E9PJZ7;H0YHK3;O75334-8;O75334-7;O75145-2;O75145;E9PID5;F8VU88;R4GNF1;H0YIJ4;H0YHJ4;H0YDW2;R4GN36;B1APN9;O75335	G3V200;O75334-2;O75334-4;O75334-3;O75334;O75334-6;O75334-5;F8VWR9;E9PPF6;E9PJZ7;H0YHK3;O75334-8;O75334-7;O75145-2;O75145	Liprin-alpha-2;Liprin-alpha-3	PPFIA2;PPFIA1;PPFIA3	18.2921	18.5185	16.2449	18.4823	18.8344	18.3502	18.5537	NaN	17.7833	18.802	17.5598	4	4	1	3.2	3.2	1	142.11	0	5.5116	271410000	5
990	G3V203;J3QQ67;Q07020;H0YHA7;Q07020-2;F8VUA6;F8VYV2;A0A075B7A0;F8VXR6	G3V203;J3QQ67;Q07020;H0YHA7;Q07020-2;F8VUA6;F8VYV2;A0A075B7A0	60S ribosomal protein L18	RPL18	28.0954	28.025	27.5749	27.5422	27.5595	26.4044	27.5382	27.841	26.7141	27.6964	27.6836	6	6	6	39.6	39.6	39.6	18.756	0	55.361	21836000000	91
991	G3V482;G3V265;G3V264;G3V2M1;G3V5Q9;P05154;G3V4B4;G3V3F5	G3V482;G3V265;G3V264;G3V2M1;G3V5Q9;P05154;G3V4B4;G3V3F5	Plasma serine protease inhibitor	SERPINA5	NaN	NaN	19.3905	16.8324	20.5577	NaN	18.5592	NaN	NaN	NaN	18.3852	2	2	2	14.6	14.6	14.6	15.907	0.002359	2.9428	18456000	7
992	G3V2D8;Q68DK2-2;Q68DK2;E7ER42;REV__Q8N6N2-2;E7ESB3;REV__Q8N6N2;H7C1W0;Q96L15-2;Q96L15;Q13508-2;Q13508-3;Q13508	G3V2D8;Q68DK2-2;Q68DK2;E7ER42;REV__Q8N6N2-2;E7ESB3;REV__Q8N6N2;H7C1W0;Q96L15-2;Q96L15;Q13508-2;Q13508-3;Q13508	Zinc finger FYVE domain-containing protein 26;NAD(P)(+)--arginine ADP-ribosyltransferase;Ecto-ADP-ribosyltransferase 5;Ecto-ADP-ribosyltransferase 3	ZFYVE26;ART3;ART5	15.5161	16.6158	17.3019	14.9629	16.697	17.595	NaN	16.136	16.2407	NaN	NaN	2	2	1	0.6	0.6	0.4	248.74	0.0098684	2.1565	113520000	4
993	G3V2F7;I3L0A0;Q13404;Q13404-7;Q13404-2;Q13404-1;Q13404-6	G3V2F7;I3L0A0;Q13404;Q13404-7;Q13404-2;Q13404-1;Q13404-6	Ubiquitin-conjugating enzyme E2 variant 1	UBE2V1;TMEM189-UBE2V1	NaN	21.589	21.0938	NaN	21.4059	22.7746	23.1145	21.2062	NaN	22.7839	21.2932	3	3	1	24.8	24.8	8.6	12.019	0	5.4865	362170000	5
994	G3V3J9;G3V2N0;P59768;G3V415;G3V2C9	G3V3J9;G3V2N0;P59768;G3V415	Guanine nucleotide-binding protein subunit gamma;Guanine nucleotide-binding protein G(I)/G(S)/G(O) subunit gamma-2	GNG2	26.1841	22.8463	24.5159	22.2977	25.1385	24.897	23.8038	22.1487	21.5846	22.0821	23.2118	5	4	4	60.8	54.9	54.9	11.232	0	45.128	2002300000	33
995	G3V2R9;G3V3Y1;Q8N8N7	G3V2R9;G3V3Y1;Q8N8N7	Prostaglandin reductase 2	PTGR2	17.1163	19.3089	NaN	16.8301	19.1327	20.6694	NaN	NaN	NaN	NaN	NaN	2	2	2	9.2	9.2	9.2	23.38	0.0058336	2.4607	34656000	1
996	G3V2S6;Q9Y5K8;H0YJH8;H0YJS0;G3V2V6;G3V559;H0YJ55;G3V5S7;G3V341;G3V3T8	G3V2S6;Q9Y5K8;H0YJH8;H0YJS0;G3V2V6;G3V559	V-type proton ATPase subunit D	ATP6V1D	22.4168	20.8688	24.1871	21.0297	24.0772	21.1941	21.8637	19.3487	20.1328	22.1105	22.3973	6	6	6	40.1	40.1	40.1	21.921	0	63.833	730020000	28
997	G3V2W1;Q9UK55	G3V2W1;Q9UK55	Protein Z-dependent protease inhibitor	SERPINA10	NaN	NaN	NaN	19.6533	NaN	15.6563	NaN	NaN	NaN	NaN	NaN	3	3	3	6.6	6.6	6.6	55.113	0.00042364	3.8346	26287000	3
998	G3V325;C9JJT5;P56134-4;P56134-2;O75127	G3V325;C9JJT5;P56134-4;P56134-2	ATP synthase subunit f, mitochondrial	ATP5J2-PTCD1;ATP5J2	24.0424	22.625	23.3635	22.9718	23.915	22.6511	24.0954	23.6241	24.2831	23.5323	24.1797	6	6	4	5.5	5.5	2.3	84.109	0	49.564	6840500000	191
999	G3V357;P07998	G3V357;P07998	Ribonuclease pancreatic	RNASE1	NaN	NaN	NaN	19.7951	NaN	NaN	NaN	NaN	NaN	NaN	NaN	1	1	1	9.5	9.5	9.5	13.049	0.0012257	3.3868	7277900	1
1000	G3V3A4;Q13573;G3V4X8;G3V5R3	G3V3A4;Q13573;G3V4X8;G3V5R3	SNW domain-containing protein 1	SNW1	19.8469	21.0376	20.6436	20.7681	21.0175	17.5996	16.4763	20.4024	18.4535	16.5373	17.3162	6	6	6	17.2	17.2	17.2	65.391	0	43.854	395090000	28
1001	G3V5P8;G3V3B2;G3V4K0;O95406	G3V5P8;G3V3B2;G3V4K0;O95406	Protein cornichon homolog 1	CNIH1	20.6457	21.6798	20.8126	NaN	22.6756	21.7702	22.7865	22.6418	NaN	21.7695	21.3321	2	2	2	24	24	24	14.051	0	9.6315	80831000	12
1002	V9GY54;G3V3G9;Q5TAQ9;Q5TAQ9-2;Q5TAQ8	V9GY54;G3V3G9;Q5TAQ9	DDB1- and CUL4-associated factor 8	DCAF8	21.1703	NaN	19.1308	21.4016	19.5015	16.9173	22.139	20.308	21.6877	22.2183	NaN	5	5	5	13.2	13.2	13.2	46.525	0	6.9286	523250000	7
1003	G3V511;G3V3X5;Q14767	G3V511;G3V3X5;Q14767	Latent-transforming growth factor beta-binding protein 2	LTBP2	22.3059	19.6888	17.4099	NaN	15.3376	18.6532	16.5788	22.4827	20.7402	18.1273	21.658	16	16	16	14.2	14.2	14.2	189.24	0	191.79	1646200000	56
1004	H0YJ63;G3V438;H0YJG7;O95433-2;O95433	H0YJ63;G3V438;H0YJG7;O95433-2;O95433	Activator of 90 kDa heat shock protein ATPase homolog 1	AHSA1	NaN	21.4618	22.6509	21.4739	22.0894	NaN	21.3812	NaN	19.1659	NaN	19.5971	2	2	2	37.8	37.8	37.8	10.031	0	9.1576	83847000	6
1005	H0YJW4;G3V4C4;O43405;O43405-2;G3V5X3;G3V5V4	H0YJW4;G3V4C4;O43405;O43405-2	Cochlin	COCH	18.666	19.5247	22.1996	NaN	22.7394	NaN	NaN	18.5947	17.4171	17.9963	18.3087	10	10	10	23.3	23.3	23.3	48.028	0	61.293	367800000	17
1006	G3V4K3;Q9H9C1-2;Q9H9C1	G3V4K3;Q9H9C1-2;Q9H9C1	Spermatogenesis-defective protein 39 homolog	VIPAS39	NaN	NaN	17.5958	16.801	18.4517	19.4783	16.8119	16.9885	NaN	NaN	NaN	3	3	3	6.4	6.4	6.4	59.718	0	5.8336	62881000	5
1007	G3V4P8;P60983;G3V3X4;M0QYG8;M0R1D2;M0R0C1;M0QYJ8;O60234	G3V4P8;P60983	Glia maturation factor beta	GMFB	21.6614	21.1785	19.6265	22.1969	19.9122	23.2585	20.7709	NaN	21.5934	22.1828	NaN	3	3	3	23.3	23.3	23.3	17.512	0	6.7314	352480000	6
1008	G3V4S9;Q9UN36-2;Q9UN36;Q9UN36-3;Q9UN36-6;G3V5H8;G3V578;H0YJT9;G3V5L7;Q9UN36-4;Q9UN36-5;G3V2I9;G3V5S0;G3V392;G3V5G0;G3V2A6;G3V5B7;G3V383;H0YJ56;G3V271;G3V5B5;G3V239;G3V5P9;G3V5D7;G3V2S0;G3V3C3;G3V2Y3;G3V5G7;A0A088AWQ3;G3V552;G3V3X3;G3V3P6;G3V4T9;G3V2T2;G3V5A6;G3V280;G3V3P1;G3V5V9;G3V3D5;G3V3X2;G3V285;G3V4S2;G3V358;G3V4X3;G3V420;G3V237;G3V3L1;H7C0X0	G3V4S9;Q9UN36-2;Q9UN36;Q9UN36-3;Q9UN36-6;G3V5H8;G3V578;H0YJT9;G3V5L7;Q9UN36-4;Q9UN36-5;G3V2I9;G3V5S0;G3V392;G3V5G0	Protein NDRG2	NDRG2	23.6486	21.1402	19.8978	21.0974	22.2431	25.0388	19.3409	18.5972	17.5657	NaN	19.547	10	10	9	53.5	53.5	51.5	33.479	0	99.191	908940000	31
1009	G3V4T7;Q96NE9-2;Q96NE9;H0YJ19;Q96NE9-3	G3V4T7;Q96NE9-2;Q96NE9	FERM domain-containing protein 6	FRMD6	NaN	NaN	NaN	15.9117	NaN	19.9751	NaN	16.8615	NaN	NaN	NaN	3	3	3	7.5	7.5	7.5	62.852	0	5.663	37551000	2
1010	G3V4U0;Q9UBX5;G3XA98;H0YJ31;G3V3Y2	G3V4U0;Q9UBX5;G3XA98;H0YJ31	Fibulin-5	FBLN5	23.9717	22.6778	21.5322	19.6388	20.5512	23.0433	20.1234	25.044	23.8755	17.6091	22.8069	14	14	14	32.2	32.2	32.2	50.881	0	54.124	2494100000	97
1011	G3V529;Q9GZR7;Q9GZR7-2;A0A087WXU8;F5GYL3	G3V529;Q9GZR7;Q9GZR7-2;A0A087WXU8;F5GYL3	ATP-dependent RNA helicase DDX24	DDX24	16.3744	17.678	21.4614	NaN	19.6554	NaN	NaN	17.5688	NaN	16.1272	NaN	7	7	7	8.9	8.9	8.9	91.48	0	12.149	231440000	11
1012	G3V533;Q6ZMZ3-2;Q6ZMZ3	G3V533;Q6ZMZ3-2;Q6ZMZ3	Nesprin-3	SYNE3	NaN	14.76	NaN	14.7741	15.4458	NaN	NaN	NaN	NaN	NaN	NaN	2	2	2	2.5	2.5	2.5	83.924	0.0015962	3.1311	8190300	4
1013	G3V556;P56378;P56378-2	G3V556;P56378;P56378-2	6.8 kDa mitochondrial proteolipid	C14orf2;MP68	27.614	23.1879	26.9935	26.0944	26.7189	26.1916	27.9612	27.5684	27.961	27.1768	27.4569	3	3	3	19.2	19.2	19.2	11.281	0.00021725	4.1935	6955100000	20
1014	G3V599;O15320-8;O15320-4;O15320-3;O15320-10;O15320;O15320-9;O15320-6;O15320-5;O15320-7;O15320-2;Q96RT6;A4FU28;Q86UF2;A4D2H0;Q8IX94;P0CG41;Q8IX95;G3V5K6	G3V599;O15320-8;O15320-4;O15320-3;O15320-10;O15320;O15320-9;O15320-6;O15320-5;O15320-7;O15320-2	cTAGE family member 5	CTAGE5	19.9242	18.5135	20.38	18.1536	21.0745	16.2373	19.8905	19.5267	19.466	19.2733	19.68	15	15	15	13.7	13.7	13.7	151.72	0	71.045	783430000	39
1015	G3V5T0;G3V267;G3V4T6	G3V5T0;G3V267;G3V4T6		GSTZ1	22.3116	21.2389	20.1365	20.3329	21.0256	20.2454	22.5617	20.2339	23.0495	21.9223	22.1021	6	6	1	41.1	41.1	6.4	22.61	0	24.195	457360000	23
1016	G3V5X7;Q99973-2;Q99973;G3V2A4;H0YIZ2;H0YIY9;G3V470;G3V591	G3V5X7;Q99973-2;Q99973;G3V2A4;H0YIZ2;H0YIY9;G3V470	Telomerase protein component 1	TEP1	15.8544	15.3372	NaN	17.4327	14.2174	14.3439	NaN	NaN	NaN	17.9957	18.2242	4	4	4	1.8	1.8	1.8	278.02	0.00041684	3.618	127900000	5
1017	G3V5Z3;Q6IN85-2;Q6IN85;H0YIY8;Q6IN85-5;Q6IN85-4;G3V5A2	G3V5Z3;Q6IN85-2;Q6IN85;H0YIY8;Q6IN85-5;Q6IN85-4	Serine/threonine-protein phosphatase 4 regulatory subunit 3A	SMEK1	15.147	18.5229	18.5364	15.748	18.4636	NaN	16.4768	15.7565	NaN	16.9753	NaN	3	3	3	5	5	5	82.03	0.0017871	3.0788	58051000	8
1018	G3V5Z7;P60900;G3V295;P60900-2;G3V3I1;G3V3U4;P60900-3;G3V4S5;G3V2S7;H0YJC4	G3V5Z7;P60900;G3V295;P60900-2;G3V3I1	Proteasome subunit alpha type;Proteasome subunit alpha type-6	PSMA6	23.3877	24.3568	23.9121	24.0748	24.6726	24.3254	24.5918	21.2664	23.7247	24.3005	22.465	11	11	11	50.8	50.8	50.8	28.147	0	50.504	3235800000	83
1019	G3XAG1;Q96ME7;Q96ME7-2;Q96ME7-3	G3XAG1;Q96ME7;Q96ME7-2;Q96ME7-3	Zinc finger protein 512	ZNF512	20.1582	23.2374	20.873	22.573	22.3866	19.5476	NaN	17.9809	NaN	NaN	17.2102	13	13	13	37.3	37.3	37.3	64.594	0	49.187	863110000	26
1020	G3XAI2;P07942;E7EPA6;E9PCS6;C9J296	G3XAI2;P07942;E7EPA6	Laminin subunit beta-1	LAMB1	24.2201	23.4043	23.6619	23.2755	24.7912	24.3313	23.1156	23.6632	23.7056	22.3504	23.9403	58	58	58	40.3	40.3	40.3	200.48	0	323.31	19125000000	477
1021	G3XAK1;P26927;H7C0F8;Q2TV78-2;Q2TV78	G3XAK1;P26927;H7C0F8	Hepatocyte growth factor-like protein;Hepatocyte growth factor-like protein alpha chain;Hepatocyte growth factor-like protein beta chain	MST1	NaN	16.7192	18.4557	20.9308	17.9032	NaN	18.3714	NaN	NaN	16.0695	17.4224	4	4	4	7.2	7.2	7.2	81.998	0	16.411	144980000	5
1022	G3XAN1;Q9NV88-2;Q9NV88;Q9NV88-3;E5RK47;E5RG70;E5RJ88;H0YBH8	G3XAN1;Q9NV88-2;Q9NV88;Q9NV88-3;E5RK47;E5RG70	Integrator complex subunit 9	INTS9	NaN	18.7654	16.3312	17.5751	17.4515	NaN	18.5578	18.9355	NaN	NaN	NaN	4	4	4	9	9	9	58.898	0.00022119	4.4366	39376000	3
1023	G3XAN4;Q15629-2;Q15629	G3XAN4;Q15629-2;Q15629	Translocating chain-associated membrane protein 1	TRAM1	24.0559	23.1551	23.5599	23.3203	23.6169	22.8801	23.759	23.5299	23.0545	23.8346	23.9358	2	2	2	8	8	8	33.435	0	33.874	1781600000	27
1024	G5E933;O95248;O95248-4	G5E933;O95248;O95248-4	Myotubularin-related protein 5	SBF1	17.6335	19.1966	17.2383	16.8527	17.7896	17.5938	22.9842	15.5126	19.1327	17.9157	16.1747	4	4	4	2.5	2.5	2.5	208.44	0	5.8143	1073200000	10
1025	G5E971;P45452;Q7Z5M0	G5E971;P45452;Q7Z5M0	Collagenase 3	MMP13	NaN	NaN	NaN	19.4395	NaN	NaN	16.6224	NaN	17.0906	19.9217	NaN	5	5	5	13.9	13.9	13.9	55.802	0	8.0369	60748000	6
1026	G5E972;P42167-2;H0YJH7;P42167-3;P42166	G5E972;P42167-2;H0YJH7;P42167-3;P42166	Lamina-associated polypeptide 2, isoforms beta/gamma;Thymopoietin;Thymopentin;Lamina-associated polypeptide 2, isoform alpha;Thymopoietin;Thymopentin	TMPO	24.6578	27.1768	25.4383	25.5244	25.207	22.1603	22.8661	25.0501	22.5178	23.7804	23.6768	13	13	1	47.1	47.1	3.4	46.306	0	302.38	9661900000	106
1027	G5E973;P30203-5;P30203-3;P30203-4;P30203-2;P30203	G5E973;P30203-5;P30203-3;P30203-4;P30203-2;P30203	T-cell differentiation antigen CD6	CD6	NaN	NaN	NaN	NaN	NaN	NaN	NaN	NaN	NaN	NaN	NaN	1	1	1	3.4	3.4	3.4	49.8	0	8.9023	25062000	1
1028	G5E975;Q12824-2;Q12824;B5MCL5;C9JTA6	G5E975;Q12824-2;Q12824;B5MCL5	SWI/SNF-related matrix-associated actin-dependent regulator of chromatin subfamily B member 1	SMARCB1	19.2965	20.8338	20.516	19.6705	20.0894	17.8335	17.6193	19.7392	NaN	19.754	NaN	3	3	3	9.6	9.6	9.6	45.05	0	5.7901	171450000	7
1029	G5E977;Q6XQN6;Q6XQN6-2;C9J8U2;Q6XQN6-3;H0YDA6;H0YF31;A0A087WUT5	G5E977;Q6XQN6;Q6XQN6-2;C9J8U2;Q6XQN6-3	Nicotinate phosphoribosyltransferase	NAPRT	NaN	15.844	15.1	17.4014	16.7285	16.7252	20.7307	16.5966	17.3839	20.4199	16.8601	5	5	5	15.1	15.1	15.1	62.171	0	23.501	118420000	11
1030	G5E9A7;Q09019;Q8WUW6	G5E9A7;Q09019;Q8WUW6	Dystrophia myotonica WD repeat-containing protein	DMWD	NaN	NaN	NaN	NaN	16.5422	20.1216	NaN	NaN	NaN	16.7233	16.2049	3	3	3	6.3	6.3	6.3	67.701	0	8.7556	42600000	4
1031	G5E9C5;O76074-2;O76074;H0YA14;C9JGT3	G5E9C5;O76074-2;O76074	cGMP-specific 3,5-cyclic phosphodiesterase	PDE5A	NaN	19.4409	NaN	NaN	NaN	NaN	NaN	NaN	NaN	NaN	NaN	3	3	3	4	4	4	93.629	0.00042319	3.8267	40822000	2
1032	G5E9L9;Q8N568-2;Q8N568;Q8N568-3	G5E9L9;Q8N568-2;Q8N568;Q8N568-3	Serine/threonine-protein kinase DCLK2	DCLK2	19.8813	NaN	16.9697	NaN	17.9503	20.9611	NaN	NaN	NaN	NaN	NaN	4	4	3	7.3	7.3	4.9	76.148	0	8.7627	135280000	7
1033	G5E9P5;Q86TS9-3;Q86TS9	G5E9P5;Q86TS9-3;Q86TS9	39S ribosomal protein L52, mitochondrial	MRPL52	19.8756	NaN	NaN	NaN	NaN	NaN	19.7359	19.4677	NaN	19.4249	NaN	1	1	1	30	30	30	11.681	0.0051399	2.5916	19584000	2
1034	G5E9W7;G5E9V5;P82650;H7C5F2;H7C5H3;P82650-2;H7C5L9	G5E9W7;G5E9V5;P82650;H7C5F2;H7C5H3;P82650-2	28S ribosomal protein S22, mitochondrial	MRPS22	22.0734	20.5672	21.4048	21.0011	22.4212	18.0788	21.1139	22.2773	21.3123	20.2166	21.4434	10	10	10	35.1	35.1	35.1	36.805	0	22.198	776110000	31
1035	G5E9W9;Q9NUV9	G5E9W9;Q9NUV9	GTPase IMAP family member 4	GIMAP4	NaN	NaN	NaN	NaN	NaN	19.019	18.967	NaN	NaN	18.3351	18.1891	2	2	2	7.3	7.3	7.3	39.033	0	12.461	69755000	3
1036	G5EA06;Q92552;Q92552-2;D6RH20;D6RJC7;E5RJ73	G5EA06;Q92552;Q92552-2;D6RH20;D6RJC7	28S ribosomal protein S27, mitochondrial	MRPS27	22.6134	21.5631	22.1148	20.7183	22.1104	20.4808	21.8608	21.7807	22.1589	20.6081	21.7771	8	8	8	22.9	22.9	22.9	41.329	0	14.796	987450000	27
1037	G5EA09;O00560-2	G5EA09;O00560-2	Syntenin-1	SDCBP	18.3063	18.1457	18.3206	19.2263	18.9824	19.9418	NaN	NaN	18.4755	17.7436	18.6012	6	1	1	27	5.3	5.3	34.819	0	5.691	73108000	4
1038	G5EA13;O60353-2;O60353;E5RJG0	G5EA13;O60353-2;O60353;E5RJG0	Frizzled-6	FZD6	20.3509	NaN	NaN	NaN	20.3772	NaN	NaN	19.0477	NaN	18.6826	18.583	2	2	2	10.1	10.1	10.1	53.608	0.0042332	2.6923	93256000	5
1039	G5EA30;Q92879-5;Q92879-2;Q92879-3;Q92879-6;Q92879;Q92879-4;E9PQK4;E9PSH0;E9PKU1;E9PKA1;F5H4Y5;F5H0D8	G5EA30;Q92879-5;Q92879-2;Q92879-3;Q92879-6;Q92879;Q92879-4	CUGBP Elav-like family member 1	CELF1	20.3033	22.2514	22.5831	21.6391	22.9409	21.9799	21.2548	20.6356	NaN	21.2879	19.8191	5	5	5	12.6	12.6	12.6	55.142	0	63.415	735850000	20
1040	G5EA42;Q9NZR1;Q9NZR1-2	G5EA42;Q9NZR1;Q9NZR1-2	Tropomodulin-2	TMOD2	22.8845	19.6294	20.85	20.6096	20.8269	21.2446	18.6082	17.7814	NaN	17.5073	18.8923	6	6	6	24.4	24.4	24.4	34.492	0	22.026	326380000	15
1041	G8JLB6;P31943;E9PCY7;D6RBM0;D6RIT2;D6RIU0;D6RAM1;E5RGV0;D6R9T0;D6RFM3;D6RDU3;D6RJ04;D6RIH9;H0YB39;E7EQJ0;E7EN40;H0YBD7;D6RF17;D6RDL0;E5RGH4;H0YBG7;H0YAQ2;D6R9D3;E5RJ94;H7C2J6;Q9NQA5	G8JLB6;P31943;E9PCY7;D6RBM0;D6RIT2;D6RIU0;D6RAM1;E5RGV0;D6R9T0;D6RFM3;D6RDU3;D6RJ04;D6RIH9;H0YB39	Heterogeneous nuclear ribonucleoprotein H;Heterogeneous nuclear ribonucleoprotein H, N-terminally processed	HNRNPH1	25.9511	27.0198	26.5759	26.4213	27.0451	25.1529	25.5825	26.1163	24.5906	25.7195	25.749	18	18	8	44.9	44.9	22.7	51.229	0	323.31	23618000000	445
1042	X6RM00;G8JLD3;X6RLX0;Q8IUD2-4;Q8IUD2-2;Q8IUD2-3;Q8IUD2;K7EPP6;Q8IUD2-5;K7EPD6;K7EIZ7	X6RM00;G8JLD3;X6RLX0;Q8IUD2-4;Q8IUD2-2;Q8IUD2-3;Q8IUD2;K7EPP6;Q8IUD2-5	ELKS/Rab6-interacting/CAST family member 1	ERC1	18.8836	NaN	19.2106	18.0069	19.7097	17.1916	18.9182	15.2256	17.9717	17.8994	17.377	6	6	3	4.7	4.7	2.8	111.97	0	7.2902	269120000	23
1043	G8JLD5;O00429-4;O00429-5;O00429-3;O00429-2;O00429;O00429-8;O00429-6;O00429-7;B4DPZ9;F8W1W3;F8VZ52;F8VUJ9;F8VR28;F8VYL3;B4DDQ3;H0YI79;H0YHY4	G8JLD5;O00429-4;O00429-5;O00429-3;O00429-2;O00429;O00429-8;O00429-6;O00429-7	Dynamin-1-like protein	DNM1L	21.2145	21.1741	22.4275	20.8373	22.5353	19.221	22.023	21.1345	20.7385	22.2756	21.9787	19	19	19	33.3	33.3	33.3	79.621	0	154.5	1999100000	148
1044	G8JLK1;Q9NZ43;M0QZE0;M0QYT5;Q9NZ43-3;Q9NZ43-2;M0QZZ6	G8JLK1;Q9NZ43;M0QZE0;M0QYT5;Q9NZ43-3;Q9NZ43-2	Vesicle transport protein USE1	USE1	16.5436	17.1668	18.6293	19.9926	20.5536	16.9967	18.3385	18.6764	17.3631	18.1689	19.7736	4	4	4	16	16	16	29.098	0.00021468	4.0406	149290000	6
1045	G8JLQ3;P78537-2;P78537;F8W099;F8W606;A0A087WSV2;F8W036;F8VP73	G8JLQ3;P78537-2;P78537;F8W099;F8W606;A0A087WSV2;F8W036;F8VP73	Biogenesis of lysosome-related organelles complex 1 subunit 1	BLOC1S1	19.2473	NaN	19.6756	NaN	18.9881	22.1268	NaN	NaN	NaN	NaN	NaN	2	2	2	29.3	29.3	29.3	8.5676	0.00022247	4.5268	63156000	4
1046	X6RLT1;H0UI80;Q8IXH7-4;Q8IXH7	X6RLT1;H0UI80;Q8IXH7-4;Q8IXH7	Negative elongation factor C/D	NELFCD;TH1L	NaN	18.2315	17.6414	17.1312	17.6389	NaN	NaN	NaN	NaN	NaN	NaN	2	2	2	4	4	4	66.432	0.0079866	2.3184	21497000	1
1047	H0Y2S1;O43824	H0Y2S1;O43824	Putative GTP-binding protein 6	GTPBP6	NaN	19.0714	18.7109	NaN	19.1683	16.6907	NaN	NaN	NaN	NaN	NaN	3	3	3	8.5	8.5	8.5	56.897	0.00022406	4.6065	46896000	5
1048	H0Y2S9;H0Y7E2;H7C3G6	H0Y2S9;H0Y7E2		MPRIP	16.2672	NaN	19.5888	NaN	19.9418	15.2798	NaN	NaN	NaN	NaN	NaN	17	7	7	11.8	4.7	4.7	203.37	0	10.788	224210000	9
1049	H0Y2Y8;Q15942;B4DQX7;C9JJK5;H7C3D3;C9IZ41	H0Y2Y8;Q15942;B4DQX7	Zyxin	ZYX	23.0729	22.645	21.8128	22.7868	22.657	21.7434	22.9813	23.1877	22.39	23.5379	24.2226	10	10	10	29.3	29.3	29.3	57.643	0	42.881	2523900000	49
1050	Q5QPK2;H0Y368;O60762;Q5QPJ9	Q5QPK2;H0Y368;O60762	Dolichol-phosphate mannosyltransferase subunit 1	DPM1	23.5163	22.7153	22.4735	22.2113	22.6108	22.4103	22.6592	23.1882	22.7991	22.1307	22.8324	9	9	9	41.1	41.1	41.1	32.426	0	31.992	1571100000	67
1051	H0Y3C5;J3KPD6;P08631-3;P08631-2;P08631-4;P08631	H0Y3C5;J3KPD6;P08631-3;P08631-2;P08631-4;P08631	Non-specific protein-tyrosine kinase;Tyrosine-protein kinase HCK	HCK	NaN	NaN	NaN	16.4998	NaN	NaN	NaN	NaN	NaN	NaN	17.5321	3	1	1	5.9	2.5	2.5	59.51	0.0047746	2.6196	24022000	2
1052	H0Y5X0;Q5QPI7;H0Y3D0;Q5QPJ6;Q5QPJ3;H0Y6Q1;H0Y473;Q5QPI9;O75354-2;O75354-3;O75354	H0Y5X0;Q5QPI7;H0Y3D0;Q5QPJ6;Q5QPJ3;H0Y6Q1;H0Y473;Q5QPI9;O75354-2;O75354-3;O75354	Ectonucleoside triphosphate diphosphohydrolase 6	ENTPD6	NaN	NaN	19.4985	NaN	19.7427	NaN	NaN	NaN	NaN	NaN	NaN	1	1	1	11.3	11.3	11.3	15.913	0.0042073	2.6381	9707900	2
1053	H0Y4B0;O43414-3;O43414-2;O43414;F6QUN3;F6UGJ8	H0Y4B0;O43414-3;O43414-2;O43414;F6QUN3	ERI1 exoribonuclease 3	ERI3	20.9035	21.7495	21.5802	21.1393	21.9834	22.1591	17.1713	19.0996	17.4878	19.8252	NaN	4	4	4	27.9	27.9	27.9	22.89	0	15.532	287790000	12
1054	H0Y4R1;P12268;E7ETK5	H0Y4R1;P12268;E7ETK5	Inosine-5-monophosphate dehydrogenase 2	IMPDH2	23.1304	23.0821	23.5601	22.9312	23.6684	23.1448	23.0166	20.5361	22.2366	22.326	22.938	12	12	11	37	37	35.3	50.957	0	137.22	2792400000	73
1055	H0Y4R4	H0Y4R4		TOR1AIP1	NaN	21.0273	NaN	NaN	NaN	NaN	NaN	20.5316	NaN	NaN	NaN	8	1	1	31.1	4.1	4.1	33.639	0.00022153	4.4553	65752000	2
1056	H0Y4Y2;Q6IQ20	H0Y4Y2;Q6IQ20	N-acyl-phosphatidylethanolamine-hydrolyzing phospholipase D	NAPEPLD	17.4557	NaN	NaN	NaN	18.0042	17.01	NaN	NaN	NaN	NaN	NaN	1	1	1	11.9	11.9	11.9	16.645	0.0023636	2.9584	7426200	0
1057	H0Y544;Q9UGH3-2;Q9UGH3	H0Y544;Q9UGH3-2;Q9UGH3	Solute carrier family 23 member 2	SLC23A2	19.8186	21.8924	20.0285	20.8157	21.1682	19.3086	NaN	NaN	NaN	NaN	NaN	3	3	3	10.5	10.5	10.5	32.78	0.00041982	3.7252	107390000	9
1058	H0Y5B4;H7BZ11;J3KQN4;Q969Q0;P83881;R4GN19	H0Y5B4;H7BZ11;J3KQN4;Q969Q0;P83881;R4GN19	60S ribosomal protein L36a-like;60S ribosomal protein L36a	RPL36A;RPL36A-HNRNPH2;RPL36AL	23.4744	24.786	23.841	24.2072	24.4181	21.0958	20.9495	20.7869	21.9587	23.8862	22.6654	3	3	3	16.1	16.1	16.1	13.228	0	7.4684	783090000	10
1059	H0Y621;H0Y5K5;Q9Y282;Q9Y282-3;Q9Y282-2;H0Y802;H0Y6Z0	H0Y621;H0Y5K5;Q9Y282;Q9Y282-3;Q9Y282-2	Endoplasmic reticulum-Golgi intermediate compartment protein 3	ERGIC3	21.7814	20.2982	22.626	20.115	22.9847	20.4843	21.8765	22.6422	21.6235	21.8971	22.5581	4	4	4	10.7	10.7	10.7	36.851	0	9.1915	695430000	17
1060	H0Y5R6;P06132	H0Y5R6;P06132	Uroporphyrinogen decarboxylase	UROD	NaN	18.5546	16.8742	NaN	18.2598	NaN	18.893	NaN	NaN	17.3486	NaN	2	2	2	9.2	9.2	9.2	25.314	0.0063647	2.4084	19145000	4
1061	H0Y630;Q9Y6E0-2;Q9Y6E0;Q5JV98	H0Y630;Q9Y6E0-2;Q9Y6E0;Q5JV98	Serine/threonine-protein kinase 24;Serine/threonine-protein kinase 24 36 kDa subunit;Serine/threonine-protein kinase 24 12 kDa subunit	STK24	18.7728	19.2141	19.5794	19.4357	19.5377	16.7037	18.7197	18.5012	19.1694	20.0068	19.1151	3	3	1	9.5	9.5	3.3	40.781	0	6.0206	113600000	5
1062	H0Y695;P48728-3;P48728-4;P48728;P48728-2;C9JXJ4	H0Y695;P48728-3;P48728-4;P48728;P48728-2	Aminomethyltransferase;Aminomethyltransferase, mitochondrial	AMT	20.938	19.8538	21.8491	17.4897	22.1488	20.4217	NaN	19.5353	20.6998	NaN	19.7003	4	4	4	11.7	11.7	11.7	41.364	0	7.784	342040000	10
1063	H0Y6A0;Q9NP61-2;Q9NP61	H0Y6A0;Q9NP61-2;Q9NP61	ADP-ribosylation factor GTPase-activating protein 3	ARFGAP3	NaN	NaN	19.8265	NaN	19.3167	NaN	NaN	NaN	NaN	NaN	NaN	1	1	1	4	4	4	29.956	0.0084793	2.2448	26907000	1
1064	H0Y6I0;Q13439-3;Q13439-4;Q13439;Q13439-5;C9JHJ5	H0Y6I0;Q13439-3;Q13439-4;Q13439;Q13439-5	Golgin subfamily A member 4	GOLGA4	NaN	16.7094	17.7589	17.1178	18.0293	16.7755	NaN	13.3059	NaN	14.1635	14.2707	7	7	7	3.4	3.4	3.4	246.6	0	13.335	149740000	7
1065	U3KQA6;H0Y6K2;P25440-4;P25440-3;P25440;P25440-2;H0Y799;E9PIQ3	U3KQA6;H0Y6K2;P25440-4;P25440-3;P25440;P25440-2;H0Y799;E9PIQ3	Bromodomain-containing protein 2	BRD2	24.3539	NaN	18.7888	NaN	NaN	26.4232	NaN	NaN	NaN	NaN	NaN	3	3	3	8.9	8.9	8.9	61.177	0.00021519	4.0648	2912100000	18
1066	H0Y6Z7;P10586-2;P10586;H0Y4H1;H0Y7Z9;H0Y380	H0Y6Z7;P10586-2;P10586;H0Y4H1;H0Y7Z9;H0Y380	Receptor-type tyrosine-protein phosphatase F	PTPRF	18.8894	17.5643	18.2526	18.2347	18.244	16.6028	17.1405	17.7078	18.3792	18.1873	18.1582	8	8	6	6.9	6.9	5.3	174.84	0	10.106	288060000	19
1067	H0Y755;M9MML0;P08637;C9JC71	H0Y755;M9MML0;P08637	Low affinity immunoglobulin gamma Fc region receptor III-A	FCGR3A	22.3344	NaN	NaN	NaN	NaN	21.5521	24.2654	21.7967	22.3098	20.8933	22.5973	3	3	2	12.9	12.9	8.5	30.725	0	19.326	597730000	22
1068	H0Y7A7;P62158;E7ETZ0;E7EMB3;Q96HY3;M0QZ52;G3V361;F8WBR5;G3V226;G3V479;C9J7T9;P02585	H0Y7A7;P62158;E7ETZ0;E7EMB3;Q96HY3;M0QZ52;G3V361	Calmodulin	CALM2;CALM1;CALM3	26.9797	26.771	26.8014	25.8542	26.5417	25.7427	26.6539	26.6301	26.4389	26.6046	26.2229	10	8	8	48.1	44.4	44.4	20.762	0	323.31	12797000000	378
1069	H0Y7H8;Q8NFD5-4;Q8NFD5;Q8NFD5-2;Q8NFD5-3	H0Y7H8;Q8NFD5-4;Q8NFD5;Q8NFD5-2;Q8NFD5-3	AT-rich interactive domain-containing protein 1B	ARID1B	NaN	17.233	17.0764	NaN	17.4523	NaN	NaN	NaN	NaN	NaN	NaN	3	3	3	1.9	1.9	1.9	190.69	0	5.3933	45526000	4
1070	H0Y7N4;Q9H7D0	H0Y7N4;Q9H7D0	Dedicator of cytokinesis protein 5	DOCK5	NaN	17.253	NaN	18.3782	18.5222	NaN	17.4752	18.1091	15.3971	18.0613	17.4181	4	3	3	4.6	3.9	3.9	126.01	0.00042436	3.8641	122780000	6
1071	H0Y7S3;Q01814-6;Q01814-8;Q01814-5;Q01814;Q01814-4;Q01814-7;Q01814-3;Q01814-2	H0Y7S3;Q01814-6;Q01814-8;Q01814-5;Q01814;Q01814-4;Q01814-7;Q01814-3;Q01814-2	Plasma membrane calcium-transporting ATPase 2	ATP2B2	16.148	NaN	NaN	NaN	15.8294	NaN	NaN	NaN	NaN	NaN	NaN	8	1	1	8	1.6	1.6	121.26	0.005302	2.543	7588900	2
1072	H7C5A5;H0Y860;Q9P246-3;Q9P246;Q9P246-2;H7C5C6;H7C5K2;R4GN82;R4GMP0	H7C5A5;H0Y860;Q9P246-3;Q9P246;Q9P246-2;H7C5C6;H7C5K2	Stromal interaction molecule 2	STIM2	16.7064	18.5194	18.1322	16.1838	19.0934	NaN	NaN	18.3383	NaN	19.1527	17.6592	3	3	3	6.3	6.3	6.3	68.007	0.00021542	4.0769	80800000	4
1073	H0Y886;O43674;E7EWP0;O43674-2;H7C568;A0A087WYD0	H0Y886;O43674;E7EWP0;O43674-2	NADH dehydrogenase [ubiquinone] 1 beta subcomplex subunit 5, mitochondrial	NDUFB5	23.3062	21.6061	21.796	21.2251	22.7943	21.4533	22.638	23.6518	22.7302	22.3733	22.4282	4	4	4	19.4	19.4	19.4	23.434	0	7.0668	813930000	23
1074	H0Y895;Q12774-2;Q12774;C9J591	H0Y895;Q12774-2;Q12774	Rho guanine nucleotide exchange factor 5	ARHGEF5	20.1497	18.1911	18.1754	18.8498	17.4065	18.8973	19.0866	NaN	16.6471	17.5049	NaN	4	4	4	6.1	6.1	6.1	89.123	0.00022437	4.6443	179440000	4
1075	H0YA96;H0Y8G5;Q14103-4;Q14103-3;Q14103-2;Q14103;D6RAF8;D6RF44;D6RBQ9;D6RD83	H0YA96;H0Y8G5;Q14103-4;Q14103-3;Q14103-2;Q14103;D6RAF8;D6RF44	Heterogeneous nuclear ribonucleoprotein D0	HNRNPD	25.9774	27.6308	27.0044	26.8993	27.4915	24.9887	25.4726	26.0633	24.7017	26.0241	25.1837	12	12	11	45.7	45.7	41.9	23.811	0	177.32	14920000000	366
1076	H0Y8H0;Q5H9U9-2;Q5H9U9	H0Y8H0;Q5H9U9-2;Q5H9U9	Probable ATP-dependent RNA helicase DDX60-like	DDX60L	23.4326	23.2115	20.5303	21.7011	19.1597	22.4262	22.5483	23.7723	21.4402	22.5376	23.4659	2	2	2	4.3	4.3	4.3	100.81	0.0088154	2.1921	5552300000	22
1077	H0Y8I1;Q9NQ11-2;Q9NQ11-3;Q9NQ11	H0Y8I1;Q9NQ11-2;Q9NQ11-3;Q9NQ11	Probable cation-transporting ATPase 13A2	ATP13A2	18.33	NaN	20.0215	NaN	19.7628	NaN	NaN	NaN	NaN	18.7533	17.0761	2	2	2	14.7	14.7	14.7	28.118	0	15.974	42952000	3
1078	H0Y8X4;O43598;O43598-2	H0Y8X4;O43598;O43598-2	2-deoxynucleoside 5-phosphate N-hydrolase 1	DNPH1	21.6131	22.4953	NaN	21.6344	21.2204	22.3806	21.16	NaN	20.656	21.3066	19.0919	2	2	2	9.9	9.9	9.9	25.868	0	7.9067	481500000	10
1079	H0Y997;Q96J42-2;Q96J42;H0Y928	H0Y997;Q96J42-2;Q96J42;H0Y928	Thioredoxin domain-containing protein 15	TXNDC15	19.1747	NaN	20.5885	NaN	20.5123	NaN	NaN	NaN	NaN	NaN	17.8467	3	3	3	14.2	14.2	14.2	37.923	0	16.901	62397000	5
1080	H0Y9P1;Q9NSY1-2;Q9NSY1-3;Q9NSY1	H0Y9P1;Q9NSY1-2;Q9NSY1-3;Q9NSY1	BMP-2-inducible protein kinase	BMP2K	18.2882	17.0959	NaN	16.7849	17.3518	NaN	18.0685	18.0189	16.818	17.9207	17.9706	1	1	1	1.8	1.8	1.8	95.533	0	7.0409	70926000	10
1081	H0Y9Y3;Q9UMS6-4;Q9UMS6-2;Q9UMS6;Q9UMS6-3	H0Y9Y3;Q9UMS6-4;Q9UMS6-2;Q9UMS6;Q9UMS6-3	Synaptopodin-2	SYNPO2	20.1772	NaN	20.1626	NaN	20.1292	19.2806	14.5706	NaN	NaN	15.5156	NaN	10	10	10	12.8	12.8	12.8	125.25	0	15.834	291980000	12
1082	H0Y9Y5;Q96PQ7-5;Q96PQ7-4;Q96PQ7-6;Q96PQ7;Q96PQ7-2;Q96PQ7-3	H0Y9Y5;Q96PQ7-5;Q96PQ7-4;Q96PQ7-6;Q96PQ7;Q96PQ7-2;Q96PQ7-3	Kelch-like protein 5	KLHL5	NaN	NaN	NaN	NaN	NaN	19.8012	NaN	NaN	NaN	NaN	NaN	1	1	1	4.3	4.3	4.3	31.108	0.0054769	2.5184	17358000	1
1083	H0YAV1;Q7LG56;Q7LG56-6;Q7LG56-2;Q7LG56-5;Q7LG56-3	H0YAV1;Q7LG56;Q7LG56-6;Q7LG56-2	Ribonucleoside-diphosphate reductase subunit M2 B	RRM2B	18.9915	18.6156	17.5696	16.4949	NaN	22.9096	16.7037	NaN	NaN	17.6784	16.8026	6	6	4	15	15	11.3	46.966	0	29.153	237990000	12
1084	H0YCC0;Q8WWB5;Q8WWB5-3;Q8WWB5-2	H0YCC0;Q8WWB5;Q8WWB5-3;Q8WWB5-2	PIH1 domain-containing protein 2	PIH1D2	19.9906	17.4	NaN	NaN	NaN	20.628	NaN	NaN	NaN	NaN	NaN	2	2	2	6.3	6.3	6.3	28.832	0.0051458	2.6012	48201000	2
1085	H0YCP6;H3BLW6;Q5T3F8-2;Q5T3F8-3;Q5T3F8	H0YCP6;H3BLW6;Q5T3F8-2;Q5T3F8-3;Q5T3F8	CSC1-like protein 2	TMEM63B	18.0572	18.0706	18.9127	19.2222	NaN	NaN	19.6083	19.7779	18.2919	19.6512	18.3048	2	2	2	3.3	3.3	3.3	60.414	0.005289	2.5196	112080000	7
1086	H0YD13;P16070-18;P16070-12;P16070-14;P16070-13;P16070-11;P16070-10;P16070-16;P16070-8;P16070-17;P16070-6;P16070-4;P16070-3;P16070-7;P16070-5;P16070;H0Y2P0;H0YE40;H0YDW7;H0YCV9;H0Y5E4;P16070-15;P16070-9;E9PKC6;H0YDX6;H0YD17;Q86UZ1;J3KN83;P16070-19	H0YD13;P16070-18;P16070-12;P16070-14;P16070-13;P16070-11;P16070-10;P16070-16;P16070-8;P16070-17;P16070-6;P16070-4;P16070-3;P16070-7;P16070-5;P16070;H0Y2P0;H0YE40;H0YDW7;H0YCV9;H0Y5E4;P16070-15;P16070-9	CD44 antigen	CD44	27.0472	23.447	20.4781	24.734	20.919	27.646	24.9506	24.7553	24.3017	24.3112	24.6343	6	6	6	34	34	34	22.683	0	100.06	7893300000	113
1087	H0YDK7;Q15771;E9PI18;E9PLM3;E9PJQ5;E9PRF7;E9PNB9;E9PS06;E9PMJ1;Q15771-2	H0YDK7;Q15771	Ras-related protein Rab-30	RAB30	18.2193	NaN	18.0166	19.9231	18.0476	20.4144	17.6641	18.9385	15.9549	NaN	NaN	3	3	3	19.8	19.8	19.8	19.249	0	9.0267	72288000	5
1088	H0YDP7;Q13405;E9PNF1	H0YDP7;Q13405	39S ribosomal protein L49, mitochondrial	MRPL49	21.4421	21.4368	21.2684	19.9515	21.6814	20.0865	22.2681	22.5039	22.2165	21.8789	22.3096	4	4	4	34.6	34.6	34.6	14.572	0	26.448	424410000	27
1089	H0YDT8;Q9NPA0	H0YDT8;Q9NPA0	ER membrane protein complex subunit 7	EMC7	21.7895	NaN	21.2886	NaN	20.8348	20.6547	21.3134	21.3225	21.0596	NaN	21.0425	1	1	1	8.3	8.3	8.3	20.885	0.0081376	2.2741	242500000	8
1090	H0YDU8;P53041;A8MU39	H0YDU8;P53041	Serine/threonine-protein phosphatase;Serine/threonine-protein phosphatase 5	PPP5C	18.0007	18.8073	20.4405	18.0792	20.3648	18.7999	18.1309	16.2748	17.3196	18.1941	NaN	4	4	4	11.8	11.8	11.8	55.096	0	34.467	146660000	8
1091	H0YEN0;Q9NPQ8-2;Q9NPQ8-4;Q9NPQ8;Q9NPQ8-3;E9PI04;E9PSI0	H0YEN0;Q9NPQ8-2;Q9NPQ8-4;Q9NPQ8;Q9NPQ8-3	Synembryn-A	RIC8A	19.0233	20.8051	NaN	19.8348	17.5289	18.9205	19.1083	18.1383	NaN	18.6181	18.7783	4	4	4	18.5	18.5	18.5	32.451	0	5.9017	107190000	11
1092	H0YEX9;P57087-2;P57087;P57087-3	H0YEX9;P57087-2;P57087;P57087-3	Junctional adhesion molecule B	JAM2	22.2337	NaN	NaN	NaN	19.5396	23.0832	NaN	NaN	NaN	NaN	NaN	3	3	3	11.9	11.9	11.9	29.02	0	6.4401	174970000	4
1093	H0YF29;Q6P1X6-2;Q6P1X6	H0YF29;Q6P1X6-2;Q6P1X6	UPF0598 protein C8orf82	C8orf82	22.054	22.3663	21.7521	21.9377	21.9222	19.882	20.4908	21.9983	21.5281	21.6346	20.762	5	5	5	24.1	24.1	24.1	28.487	0	24.092	611510000	34
1094	H0YGS7;H0YG27;Q6PJ69	H0YGS7;H0YG27;Q6PJ69	Tripartite motif-containing protein 65	TRIM65	NaN	NaN	NaN	NaN	NaN	18.1804	NaN	NaN	NaN	NaN	NaN	1	1	1	7	7	7	26.995	0.0049609	2.6122	4158800	1
1095	H0YGW7;Q8NE71-2;Q8NE71;H0Y412;Q5JSZ5-5;Q5JSZ5	H0YGW7;Q8NE71-2;Q8NE71	ATP-binding cassette sub-family F member 1	ABCF1	20.8855	20.9523	21.8058	20.9101	22.0416	19.5942	19.8929	19.3779	18.2701	20.7613	20.3934	8	8	8	14.9	14.9	14.9	67.55	0	43.951	695840000	32
1096	H0YGX7;P52566;F5H3P3;F5H6Q0;F5H2R5	H0YGX7;P52566;F5H3P3;F5H6Q0;F5H2R5	Rho GDP-dissociation inhibitor 2	ARHGDIB	22.4437	21.8699	22.0014	21.9621	21.6273	21.7241	23.3556	20.8767	22.2835	22.9645	21.3106	7	7	7	43.1	43.1	43.1	22.273	0	22.374	831630000	38
1097	H0YHB7;O43347	H0YHB7;O43347	RNA-binding protein Musashi homolog 1	MSI1	NaN	NaN	NaN	NaN	NaN	20.4623	NaN	NaN	NaN	NaN	NaN	2	1	1	13.3	8.2	8.2	25.232	0.0083072	2.2594	15891000	1
1098	H0YHS6;Q9Y2Z4	H0YHS6;Q9Y2Z4	Tyrosine--tRNA ligase;Tyrosine--tRNA ligase, mitochondrial	YARS2	23.8918	19.9188	20.8248	20.7048	20.5238	18.7859	21.854	22.3179	21.6606	20.3553	23.0047	6	6	6	27.5	27.5	27.5	32.184	0	15.357	764310000	29
1099	H0YI09;Q9H8H3;F8VQX6	H0YI09;Q9H8H3;F8VQX6	Methyltransferase-like protein 7A	METTL7A	26.2317	25.4261	25.4334	25.3409	26.6101	26.614	24.7381	23.502	24.2407	22.8504	23.535	12	12	12	52.9	52.9	52.9	28.188	0	240.9	7095200000	103
1100	H0YI37	H0YI37		ATP5B	23.3557	20.5819	21.9273	20.5322	21.5504	NaN	22.9683	23.017	NaN	NaN	22.4671	8	1	1	87.2	8.3	8.3	13.907	0	9.8533	219230000	4
1101	H0YI76	H0YI76		KRT5	NaN	NaN	NaN	21.2751	NaN	NaN	NaN	NaN	NaN	NaN	NaN	25	1	1	84.1	6.5	6.5	23	0.00021594	4.1352	38067000	1
1102	H0YIE9;O94952-1;O94952	H0YIE9;O94952-1;O94952	F-box only protein 21	FBXO21	16.7175	17.7294	17.4962	16.8357	17.3704	16.45	NaN	NaN	NaN	NaN	NaN	1	1	1	3.6	3.6	3.6	59.162	0.0083164	2.2678	20375000	3
1103	H0YJ75;Q13362-2;Q13362-3;Q13362;Q13362-4;Q13362-5;H0YN84;Q96B13;H0YJU0	H0YJ75;Q13362-2;Q13362-3;Q13362;Q13362-4;Q13362-5;H0YN84;Q96B13	Serine/threonine-protein phosphatase 2A 56 kDa regulatory subunit gamma isoform	PPP2R5C	NaN	17.7032	19.0414	NaN	18.1361	14.6389	17.5145	15.1192	NaN	NaN	NaN	6	2	2	10.1	3.3	3.3	64.063	0.0079703	2.2975	34813000	1
1104	H0YLY3;H0YKR4;H0YNR6;H0YN04;H0YKC9;Q9HA82;H0YMY6	H0YLY3;H0YKR4;H0YNR6;H0YN04;H0YKC9;Q9HA82;H0YMY6	Ceramide synthase 4	CERS4	NaN	21.5501	19.6665	20.5693	19.2811	18.8777	19.8838	20.0125	19.6071	NaN	18.1321	2	2	2	15.9	15.9	15.9	13.233	0.0019782	3.0177	69467000	7
1105	H0YKD8;P46779;P46779-2;P46779-3;H0YMF4;P46779-4;P46779-5;H0YLP6	H0YKD8;P46779;P46779-2;P46779-3;H0YMF4;P46779-4;P46779-5;H0YLP6	60S ribosomal protein L28	RPL28	25.1973	25.9193	25.2083	25.6122	25.9664	23.5836	23.8986	25.0356	23.2805	25.9581	24.3909	7	7	7	35.9	35.9	35.9	19.072	0	26.673	5249600000	88
1106	Q5SZE3;H0YKH6;Q5SZE4;Q5SZE1;Q96G23;Q5SZE2;H0YNU7	Q5SZE3;H0YKH6;Q5SZE4;Q5SZE1;Q96G23;Q5SZE2;H0YNU7	Ceramide synthase 2	CERS2	22.6467	22.7253	23.2357	22.1319	23.1481	23.5663	23.3377	22.987	22.7619	23.0105	22.6833	3	3	3	17.7	17.7	17.7	23.253	0	21.252	1048500000	22
1107	H0YKX0;Q96EP0-3;Q96EP0;H0YMN0;Q96EP0-2	H0YKX0;Q96EP0-3;Q96EP0	E3 ubiquitin-protein ligase RNF31	RNF31	20.0638	20.0811	17.1653	20.8168	NaN	NaN	19.9697	20.1272	19.6621	19.9033	20.0734	3	3	3	5	5	5	102.29	0.0023502	2.9107	452850000	7
1108	H0YL18;P61769;F5H6I0;H0YLF3	H0YL18;P61769;F5H6I0;H0YLF3	Beta-2-microglobulin;Beta-2-microglobulin;Beta-2-microglobulin form pI 5.3	B2M	27.9293	25.4609	27.9785	25.9686	27.3326	26.2779	26.7264	26.7127	26.5582	26.892	27.2079	4	4	4	39.3	39.3	39.3	13.972	0	86.691	14060000000	72
1109	H0YLB9;P49641-1;P49641;H0YNG5;P49641-2;H0YKT0;H0YKM7;H0YLU3;H0YKH9	H0YLB9;P49641-1;P49641;H0YNG5;P49641-2;H0YKT0;H0YKM7	Alpha-mannosidase;Alpha-mannosidase 2x	MAN2A2	18.4367	15.5044	18.267	NaN	18.7109	NaN	19.3322	NaN	NaN	NaN	NaN	4	4	4	6.1	6.1	6.1	89.808	0	7.6705	81264000	7
1110	H0YLH9;Q14005-3;Q14005-2;Q14005;Q14005-4	H0YLH9;Q14005-3;Q14005-2;Q14005;Q14005-4	Pro-interleukin-16;Interleukin-16	IL16	NaN	16.4537	NaN	17.3416	17.9748	NaN	15.9902	16.7309	17.5967	17.2595	18.26	2	2	2	4.7	4.7	4.7	64.547	0.0014133	3.2495	73098000	3
1111	H0YLI7;P59780;H0YLX6;H0YN38;Q7Z6K5-2;P59780-2	H0YLI7;P59780;H0YLX6;H0YN38;Q7Z6K5-2;P59780-2	AP-3 complex subunit sigma-2	AP3S2	NaN	NaN	19.998	NaN	19.4602	17.7487	NaN	NaN	NaN	NaN	NaN	2	2	2	9.8	9.8	9.8	23.398	0.0002158	4.121	21875000	3
1112	H0YMV8;Q71UM5;C9JLI6;C9J1C5	H0YMV8;Q71UM5;C9JLI6	40S ribosomal protein S27;40S ribosomal protein S27-like	RPS27L	23.1478	23.9106	23.9578	23.3226	23.576	21.9271	NaN	20.2606	20.4157	23.3026	23.1996	5	2	2	34	12	12	11.345	0	6.2625	592210000	16
1113	H0YN05;Q8IU89;H0YMG6	H0YN05;Q8IU89	Ceramide synthase 3	CERS3	19.9034	NaN	NaN	NaN	NaN	NaN	20.9398	21.1425	20.8852	18.8455	20.0798	3	3	3	16.7	16.7	16.7	19.722	0	5.3314	105880000	12
1114	H0YN14;Q8TEX9;Q8TEX9-2;H0YK93;H0YLV0;H0YL92;H0YKG5	H0YN14;Q8TEX9;Q8TEX9-2	Importin-4	IPO4	NaN	17.6766	17.4936	15.2743	24.1181	15.1623	17.1569	15.9124	20.2001	21.2233	20.8519	4	4	4	4.7	4.7	4.7	101.49	0	5.3299	1151600000	6
1115	H0YN26;P39687;O95626;H7BZ09;O43423	H0YN26;P39687	Acidic leucine-rich nuclear phosphoprotein 32 family member A	ANP32A	22.2412	25.0051	23.8888	24.2822	23.8605	21.483	23.5179	22.0268	22.6468	23.7389	21.5416	6	6	4	33.9	33.9	17.5	19.997	0	49.444	1538400000	35
1116	H0YN81;Q9GZS3;H0YL19;H0YMF9;H0YM76;H0YLA1;H3BQA8	H0YN81;Q9GZS3;H0YL19;H0YMF9	WD repeat-containing protein 61;WD repeat-containing protein 61, N-terminally processed	WDR61	20.073	21.8038	23	21.3259	22.5296	21.5688	20.6712	19.7243	20.8956	20.8355	19.4365	5	5	5	26.5	26.5	26.5	32.253	0	22.422	506050000	20
1117	H0YNA7;Q8TCT8	H0YNA7;Q8TCT8	Signal peptide peptidase-like 2A	SPPL2A	23.0483	22.5579	21.3038	22.4279	21.8611	22.589	22.5724	22.4464	21.7717	22.582	22.1411	1	1	1	9.3	9.3	9.3	16.545	0.00021464	4.0396	318100000	12
1118	H0YNE9;Q92930;H0YMN7;H0YLJ8;H0YL94;REV__Q5JTJ3	H0YNE9;Q92930;H0YMN7	Ras-related protein Rab-8B	RAB8B	20.8242	19.4644	20.6241	18.1931	21.5442	20.0527	19.635	20.2389	19.5216	17.0165	19.598	7	3	3	34.6	17	17	21.868	0	10.01	216560000	14
1119	H0YNG3;P67812-4;P67812;P67812-3;P67812-2;H0YNX5;H0YNA5;H0YKT4;P0C7V7	H0YNG3;P67812-4;P67812;P67812-3;P67812-2;H0YNX5;H0YNA5	Signal peptidase complex catalytic subunit SEC11;Signal peptidase complex catalytic subunit SEC11A;Signal peptidase I	SEC11A	24.6093	23.2446	24.8258	23.4197	24.8093	23.3671	24.9218	24.1914	23.8217	24.0612	24.0531	7	7	7	30.7	30.7	30.7	18.651	0	18.18	3024500000	101
1120	H0YNH8;Q9BZF9-2;Q9BZF9;F5H2B9;H0YN48	H0YNH8;Q9BZF9-2;Q9BZF9;F5H2B9	Uveal autoantigen with coiled-coil domains and ankyrin repeats	UACA	14.5913	15.3371	17.8077	16.8315	17.711	14.348	17.9728	16.8167	16.285	17.1523	15.2391	4	4	4	3	3	3	161.31	0	5.3314	169340000	3
1121	H0YNP1;O94923	H0YNP1;O94923	D-glucuronyl C5-epimerase	GLCE	NaN	19.1906	18.4207	19.6012	18.3087	17.6214	19.0224	17.6296	19.2462	19.4202	18.4261	3	3	3	6.5	6.5	6.5	62.886	0	7.3878	163860000	9
1122	H0YNW7;Q96F32;O14775-3;O14775-2;O14775	H0YNW7;Q96F32;O14775-3;O14775-2;O14775	Guanine nucleotide-binding protein subunit beta-5	GNB5	20.8005	NaN	20.2298	NaN	19.9819	21.151	NaN	NaN	NaN	NaN	NaN	1	1	1	12	12	12	11.429	0.00042034	3.7453	44940000	1
1123	H3BLU2;Q13449;F5H5G1;C9J5G3	H3BLU2;Q13449;F5H5G1;C9J5G3	Limbic system-associated membrane protein	LSAMP	25.0635	22.8987	22.9313	18.967	22.6088	24.5201	21.0826	NaN	19.5301	19.5135	NaN	9	9	9	29.6	29.6	29.6	38.014	0	164.14	2356400000	44
1124	H3BLU7;O43488;Q8NHP1;H7C5H7;O95154	H3BLU7;O43488	Aflatoxin B1 aldehyde reductase member 2	AKR7A2	23.5883	23.7582	23.6706	23.6419	23.9808	23.701	23.2209	22.0861	22.7698	22.9604	22.5834	9	9	9	40.8	40.8	40.8	34.684	0	40.106	1676600000	55
1125	H3BLZ8;Q92841;Q92841-1;Q92841-3;Q92841-2	H3BLZ8;Q92841;Q92841-1;Q92841-3;Q92841-2	Probable ATP-dependent RNA helicase DDX17	DDX17	24.7229	26.0276	25.7915	25.2862	25.8643	23.9661	24.5806	25.0645	23.8633	24.5046	24.3672	31	31	23	48.2	48.2	37.9	80.439	0	209.51	17096000000	318
1126	H3BM14;H3BM74;Q9Y5A7-2;Q9Y5A7;C9J7X7;C9JRT6;F8WDB6	H3BM14;H3BM74;Q9Y5A7-2;Q9Y5A7;C9J7X7;C9JRT6;F8WDB6	NEDD8 ultimate buster 1	NUB1	NaN	NaN	17.8679	16.6689	16.1191	18.4535	NaN	15.3469	15.6522	NaN	NaN	2	2	2	3.2	3.2	3.2	71.921	0.00021973	4.3434	30335000	3
1127	H3BM21;P05106-2;P05106-3;P05106;I3L4X8	H3BM21;P05106-2;P05106-3;P05106;I3L4X8	Integrin beta;Integrin beta-3	ITGB3	21.5781	18.2755	19.908	20.0262	22.7727	19.9224	18.9541	20.4451	18.9679	19.5741	20.9349	9	9	9	15.2	15.2	15.2	86.869	0	21.969	829620000	34
1128	H3BM38;O00161;H3BNE1;H3BR18;H3BPJ0;O00161-2;H3BNG6;H3BU94;H3BR99;H3BV99;H3BP15;H3BQY9	H3BM38;O00161;H3BNE1;H3BR18;H3BPJ0;O00161-2	Synaptosomal-associated protein;Synaptosomal-associated protein 23	SNAP23	23.1158	22.6805	21.2547	21.0574	22.0998	22.9426	22.9522	20.8835	22.5973	22.3787	22.4493	7	7	7	60.8	60.8	60.8	13.905	0	19.656	807560000	34
1129	H3BU49;H3BM52;Q9Y2Y0-2;Q9Y2Y0	H3BU49;H3BM52;Q9Y2Y0-2;Q9Y2Y0	ADP-ribosylation factor-like protein 2-binding protein	ARL2BP	NaN	NaN	NaN	NaN	18.6522	21.5498	NaN	NaN	NaN	NaN	NaN	1	1	1	13.8	13.8	13.8	13.812	0.006373	2.4169	20892000	2
1130	H3BM67;H3BUP2;H3BUN4;O60936-2;O60936-3;J3QLT7;O60936	H3BM67;H3BUP2;H3BUN4;O60936-2;O60936-3;J3QLT7;O60936	Nucleolar protein 3	NOL3	NaN	NaN	20.0395	NaN	20.0583	NaN	NaN	NaN	NaN	NaN	NaN	2	2	2	24.5	24.5	24.5	15.022	0	9.6435	19526000	3
1131	H3BM84;Q9BZW5	H3BM84;Q9BZW5	Transmembrane 6 superfamily member 1	TM6SF1	NaN	NaN	NaN	NaN	NaN	NaN	NaN	NaN	NaN	NaN	NaN	1	1	1	7.8	7.8	7.8	19.143	0.0067265	2.3899	10195000	1
1132	H3BMF4;Q9H2V7-3;Q9H2V7-2;Q9H2V7;H3BT44;H3BPT8;H3BPQ9;H3BR82;Q9H2V7-5;Q9H2V7-4	H3BMF4;Q9H2V7-3;Q9H2V7-2;Q9H2V7;H3BT44;H3BPT8;H3BPQ9;H3BR82;Q9H2V7-5;Q9H2V7-4	Protein spinster homolog 1	SPNS1	21.0415	20.7643	19.6076	20.3709	19.4264	19.306	20.0334	21.078	20.4016	21.0023	19.5989	2	2	2	3.5	3.5	3.5	61.105	0	5.2735	299470000	6
1133	H3BMH3;Q6PJI9-3;Q6PJI9;H3BNY4;Q6PJI9-4;Q6PJI9-2	H3BMH3;Q6PJI9-3;Q6PJI9;H3BNY4;Q6PJI9-4;Q6PJI9-2	WD repeat-containing protein 59	WDR59	NaN	18.891	NaN	17.1641	19.6656	NaN	NaN	NaN	NaN	16.674	NaN	2	2	2	8	8	8	33.29	0.00021584	4.1277	29882000	2
1134	H3BMM5;Q96AX1;F5H6Y0	H3BMM5;Q96AX1;F5H6Y0	Vacuolar protein sorting-associated protein 33A	VPS33A	20.2459	18.5195	20.5704	19.1022	20.1637	20.4032	18.2872	19.0948	18.4313	19.7545	19.1887	6	6	6	12.6	12.6	12.6	61.238	0	12.728	367810000	32
1135	H3BV80;H3BMM9;H3BTC0;Q15287-3;Q15287-2;Q15287;H3BPG5;H3BMS0	H3BV80;H3BMM9;H3BTC0;Q15287-3;Q15287-2;Q15287;H3BPG5;H3BMS0	RNA-binding protein with serine-rich domain 1	RNPS1	22.3655	24.245	23.9128	22.0434	24.3802	20.3548	22.5822	23.9192	21.5823	23.0671	23.1365	5	5	5	33.6	33.6	33.6	24.561	0	40.521	1191800000	44
1136	H3BMQ0;P49815-7;P49815-5;P49815-3;P49815-2;P49815-4;P49815;P49815-6;P49815-8;I3L3B1;Q5HYF7	H3BMQ0;P49815-7;P49815-5;P49815-3;P49815-2;P49815-4;P49815;P49815-6	Tuberin	TSC2	NaN	NaN	16.2402	NaN	16.8759	17.3176	NaN	16.4881	NaN	13.5567	NaN	6	6	6	4.8	4.8	4.8	194.39	0	10.3	69572000	5
1137	H3BMU3;O60268-3;O60268	H3BMU3;O60268-3;O60268	Uncharacterized protein KIAA0513	KIAA0513	NaN	19.0381	19.8956	NaN	20.4516	NaN	NaN	NaN	NaN	NaN	NaN	2	2	1	13.6	13.6	7.1	23.053	0.00022558	4.7422	38320000	4
1138	H3BN02;P20702;Q13349	H3BN02;P20702	Integrin alpha-X	ITGAX	19.5492	18.4624	16.7276	20.4108	16.276	19.3061	19.923	18.1505	18.9389	18.0671	17.5403	19	18	18	25	24	24	128.54	0	73.312	1352300000	35
1139	H3BN86;Q8TD49;Q9H1A3;Q9H1A3-2;H3BPE9;H3BM54	H3BN86;Q8TD49;Q9H1A3;Q9H1A3-2	Methyltransferase-like protein 9	METTL9;PAP1	NaN	17.6323	17.9079	NaN	NaN	NaN	18.5347	NaN	20.8616	NaN	17.0262	3	3	3	19.8	19.8	19.8	28.402	0	6.8408	43014000	2
1140	H3BN98;I3L246;H3BPJ2;F5GXP4;Q15041;H3BV27;H3BT37;I3L303	H3BN98;I3L246		RPS15A	25.5684	24.5776	23.9905	23.7967	24.8519	24.7688	24.8922	25.658	24.2043	24.6303	25.4502	7	3	3	26.2	10.1	10.1	27.168	0	15.912	4435700000	31
1141	H3BND4;Q6P996-3;Q6P996-4;Q6P996-5;Q6P996	H3BND4;Q6P996-3;Q6P996-4;Q6P996-5;Q6P996	Pyridoxal-dependent decarboxylase domain-containing protein 1	PDXDC1	NaN	NaN	19.8325	16.1581	19.0544	NaN	NaN	NaN	NaN	16.3518	NaN	4	4	4	5.6	5.6	5.6	88.761	0	7.6842	68661000	5
1142	H3BNF0;H3BNS4;Q9Y5Y2;H3BRE1;H3BQR2	H3BNF0;H3BNS4;Q9Y5Y2;H3BRE1;H3BQR2	Cytosolic Fe-S cluster assembly factor NUBP2	NUBP2	18.1502	17.5234	18.7189	19.1775	18.9482	20.4524	19.1181	16.0153	18.598	19.3326	18.8244	2	2	2	9.6	9.6	9.6	26.381	0	5.6507	100040000	16
1143	H3BNI4	H3BNI4		ATP6V0C	26.3151	23.1726	26.8184	25.9924	26.7121	26.5268	24.5582	25.2064	23.9876	24.4828	25.4754	2	2	2	9.8	9.8	9.8	11.602	0.0031074	2.812	2078700000	17
1144	H3BNV7;Q9Y3D0	H3BNV7;Q9Y3D0	Mitotic spindle-associated MMXD complex subunit MIP18	FAM96B	NaN	NaN	19.9855	NaN	NaN	NaN	NaN	NaN	NaN	NaN	NaN	1	1	1	13.7	13.7	13.7	17.461	0	5.1597	6228500	1
1145	H3BPN3;H3BUK6;H3BP13;Q9UL33-2;Q9UL33	H3BPN3;H3BUK6;H3BP13;Q9UL33-2;Q9UL33	Trafficking protein particle complex subunit 2-like protein	TRAPPC2L	NaN	NaN	19.4654	NaN	NaN	NaN	NaN	NaN	NaN	NaN	NaN	1	1	1	18.7	18.7	18.7	8.721	0.0097141	2.1737	5067000	1
1146	H3BS10;H3BP20;P06865;H3BU85;H3BTD4;P06865-2	H3BS10;H3BP20;P06865;H3BU85;H3BTD4	Beta-hexosaminidase;Beta-hexosaminidase subunit alpha	HEXA	19.7133	22.1252	22.3418	21.4406	22.6435	19.2353	22.0403	20.6092	21.0609	22.3855	19.1771	8	8	8	18.9	18.9	18.9	58.44	0	34.042	944540000	35
1147	H3BP71;O75150-4;O75150;O75150-3;A0A087WTK2;H3BQ99;H3BUL6;I3L332;H3BS50	H3BP71;O75150-4;O75150;O75150-3	E3 ubiquitin-protein ligase BRE1B	RNF40	NaN	18.6365	18.3902	15.6198	20.4119	19.4306	NaN	18.4205	NaN	NaN	NaN	5	5	5	6.7	6.7	6.7	109.05	0	7.1678	242030000	6
1148	H3BP77;O00142-2;O00142-3;O00142;O00142-5;O00142-4;J3QRP0;J3QL12;J3KS73	H3BP77;O00142-2;O00142-3;O00142;O00142-5;O00142-4;J3QRP0	Thymidine kinase 2, mitochondrial	TK2	22.7642	18.5701	20.6581	20.3185	20.7723	19.768	20.7589	21.8295	22.0649	20.1724	21.4662	4	4	4	18.1	18.1	18.1	32.873	0	10.446	554320000	16
1149	H3BPE1;H3BQK9;Q9UPN3;Q9UPN3-3;Q9UPN3-2;Q9UPN3-4;H0Y390;Q9UPN3-5;E9PNZ4;E9PLY5;E9PLY0;H0YD69;H0Y7I1;H0Y6T5;H0Y4F5;H0Y314	H3BPE1;H3BQK9;Q9UPN3;Q9UPN3-3;Q9UPN3-2;Q9UPN3-4;H0Y390;Q9UPN3-5	Microtubule-actin cross-linking factor 1, isoforms 1/2/3/5	MACF1	20.0851	19.6171	20.0331	21.0738	20.0882	19.048	18.8934	19.0429	18.3719	19.6221	18.8105	77	76	76	12.3	12.2	12.2	856.87	0	170.67	4917700000	185
1150	H3BPH4;H3BV55;O15305-2;O15305	H3BPH4;H3BV55;O15305-2;O15305	Phosphomannomutase;Phosphomannomutase 2	PMM2	NaN	NaN	17.9604	NaN	NaN	NaN	19.4089	NaN	19.3502	20.2832	NaN	1	1	1	8.5	8.5	8.5	16.223	0.001785	3.0556	26059000	1
1151	H3BPJ9;O96000;O96000-2;H3BV16	H3BPJ9;O96000;O96000-2;H3BV16	NADH dehydrogenase [ubiquinone] 1 beta subcomplex subunit 10	NDUFB10	25.3905	24.0515	25.0941	24.6697	25.0608	23.3433	25.0104	25.2217	25.2275	24.9201	24.4725	10	10	10	62.7	62.7	62.7	19.258	0	80.513	4674100000	97
1152	H3BPK3;H3BPQ4;Q16775-2;Q16775;H3BQW8;Q16775-3	H3BPK3;H3BPQ4;Q16775-2;Q16775;H3BQW8	Hydroxyacylglutathione hydrolase, mitochondrial	HAGH	22.625	19.871	23.3464	22.2233	23.8665	21.8307	21.2295	NaN	22.0316	21.1241	19.9847	7	7	7	36.8	36.8	36.8	26.305	0	21.965	833310000	18
1153	H3BPU4;Q9UGJ1-2;Q9UGJ1	H3BPU4;Q9UGJ1-2;Q9UGJ1	Gamma-tubulin complex component 4	TUBGCP4	NaN	NaN	17.0552	NaN	18.0294	17.953	NaN	NaN	NaN	NaN	NaN	1	1	1	2.8	2.8	2.8	44.905	0.0078067	2.3267	13807000	1
1154	H3BQV3;Q96MW5;H3BMQ9;J3QRV3;H3BSH5	H3BQV3;Q96MW5;H3BMQ9	Conserved oligomeric Golgi complex subunit 8	COG8	NaN	NaN	18.8795	16.6547	18.2736	NaN	17.2691	NaN	NaN	NaN	16.0805	3	3	3	6.7	6.7	6.7	60.438	0.00022366	4.5731	31627000	4
1155	J3KSJ9;H3BTA7;U3KQ35;H3BR06;Q15554-4;Q15554	J3KSJ9;H3BTA7;U3KQ35;H3BR06;Q15554-4;Q15554	Telomeric repeat-binding factor 2	TERF2	NaN	20.9953	21.3658	NaN	20.924	NaN	20.6398	NaN	NaN	NaN	NaN	2	2	2	26.3	26.3	26.3	11.534	0.0084574	2.2134	33664000	2
1156	H3BSL0;H3BR73;I3L1I3;Q8WV22	H3BSL0;H3BR73;I3L1I3;Q8WV22	Non-structural maintenance of chromosomes element 1 homolog	NSMCE1	NaN	NaN	NaN	NaN	NaN	19.0502	NaN	NaN	NaN	NaN	NaN	1	1	1	10.1	10.1	10.1	15.759	0.0002208	4.4134	5428600	1
1157	H3BTB7;H3BRF5;Q5JPH6;Q5JPH6-2	H3BTB7;H3BRF5;Q5JPH6;Q5JPH6-2	Probable glutamate--tRNA ligase, mitochondrial	EARS2	NaN	17.8554	17.8512	NaN	18.3247	NaN	17.0271	NaN	17.7869	16.1465	17.1343	3	3	3	7.9	7.9	7.9	56.825	0	6.1702	46651000	8
1158	H3BRH0;Q9Y653-2;Q9Y653-3;Q9Y653;H3BNH4;H3BV52;H3BVE9;H3BQJ9;H3BNN3;H3BPA6;H3BTK9;H3BSP5;H3BSN7;H3BV72;H3BRA1;H3BT88;H3BUI6;H3BSB8;H3BRI2;H3BMF8;H3BUH2;H3BM73;H3BS94;H3BRZ4;H3BVA0;H3BMY9;H3BTH7;H3BRI7;H3BQZ1;H3BVD3;H3BUU6;H3BQ46;H3BP67;H3BSJ6;Q9Y653-5;H3BQW4;H3BTD2;H3BRB4;H3BSR1;Q9Y653-4	H3BRH0;Q9Y653-2;Q9Y653-3;Q9Y653;H3BNH4;H3BV52;H3BVE9;H3BQJ9;H3BNN3;H3BPA6;H3BTK9;H3BSP5;H3BSN7;H3BV72;H3BRA1;H3BT88;H3BUI6;H3BSB8;H3BRI2;H3BMF8;H3BUH2;H3BM73;H3BS94;H3BRZ4;H3BVA0;H3BMY9;H3BTH7;H3BRI7;H3BQZ1;H3BVD3;H3BUU6;H3BQ46;H3BP67;H3BSJ6;Q9Y653-5	G-protein coupled receptor 56;GPR56 N-terminal fragment;GPR56 C-terminal fragment	ADGRG1;GPR56	22.1854	18.8608	NaN	22.017	NaN	21.6225	NaN	20.2691	NaN	NaN	NaN	4	4	4	23.8	23.8	23.8	28.985	0	12.667	181760000	8
1159	H3BRL0;Q9BXC9;H3BNS7;J3QLW0	H3BRL0;Q9BXC9	Bardet-Biedl syndrome 2 protein	BBS2	18.1396	15.2372	19.5604	NaN	20.0422	20.5102	18.3292	17.7197	18.6572	17.6706	NaN	5	5	5	7	7	7	74.627	0	7.2898	175850000	6
1160	H3BRN4;P80404;H3BNQ7;H3BPW8;H3BMJ9;H3BRJ1;H3BRT1	H3BRN4;P80404;H3BNQ7	4-aminobutyrate aminotransferase, mitochondrial	ABAT	25.0809	16.8842	24.8674	21.6668	25.4581	23.717	20.5925	20.4848	20.9456	18.7708	20.8519	25	25	25	58.4	58.4	58.4	58.14	0	249.83	5124200000	169
1161	H3BRR0;Q9NZD8-2;Q9NZD8	H3BRR0;Q9NZD8-2;Q9NZD8	Maspardin	SPG21	17.8382	NaN	NaN	17.8808	17.3025	18.3894	17.0558	18.1268	17.3117	17.1725	17.6904	2	2	2	20.8	20.8	20.8	17.258	0.0014113	3.2353	22760000	2
1162	H3BRY5;P50225;H3BQX5;E9PKR8;P50226;E9PM76;E9PKW4;P50225-2;H3BNY7;P0DMM9-2;P0DMN0;P0DMM9;P0DMM9-3	H3BRY5;P50225;H3BQX5;E9PKR8;P50226	Sulfotransferase;Sulfotransferase 1A1;Sulfotransferase 1A2	SULT1A1;SULT1A2	NaN	NaN	20.6808	17.1679	21.7975	22.2158	17.4554	NaN	NaN	NaN	NaN	7	7	7	30.2	30.2	30.2	32.625	0	13.925	339360000	13
1163	H3BRZ6;H3BS44;P37059	H3BRZ6;H3BS44;P37059	Estradiol 17-beta-dehydrogenase 2	HSD17B2	NaN	NaN	NaN	NaN	20.0601	NaN	NaN	NaN	NaN	NaN	NaN	1	1	1	8	8	8	20.45	0	7.9482	12025000	1
1164	H3BSH7;Q969X6-2;Q969X6;H3BPD7;I3L4T9;J3KSI1;Q969X6-3;J3KSE6;J3KTR0	H3BSH7;Q969X6-2;Q969X6;H3BPD7;I3L4T9;J3KSI1;Q969X6-3	Cirhin	CIRH1A	16.7876	18.0576	15.997	18.7102	16.6002	NaN	15.6422	NaN	16.3992	17.3097	NaN	4	4	4	7.3	7.3	7.3	77.942	0	5.5032	48626000	5
1165	H3BSM7;Q96GQ5;H3BR29;Q96GQ5-2;I3L2V0;H3BTA0;H3BS97	H3BSM7;Q96GQ5;H3BR29	RUS1 family protein C16orf58	C16orf58	22.2557	21.8869	23.4103	22.1074	23.7055	20.2813	22.6903	20.919	21.4146	21.188	20.6591	11	11	11	30.3	30.3	30.3	50.783	0	39.248	1098800000	45
1166	H3BSW0;Q8N9N7	H3BSW0;Q8N9N7	Leucine-rich repeat-containing protein 57	LRRC57	21.5523	21.7724	20.5385	20.7423	21.2013	20.6228	20.5014	18.8252	21.3148	20.6415	18.8919	5	5	5	38.5	38.5	38.5	16.324	0	8.8678	273550000	8
1167	H3BV22;H3BTA2;P60510;I3L4X0	H3BV22;H3BTA2;P60510	Serine/threonine-protein phosphatase;Serine/threonine-protein phosphatase 4 catalytic subunit	PPP4C	NaN	19.9811	NaN	19.8538	NaN	19.4331	20.9732	NaN	NaN	20.7402	NaN	3	2	2	21.7	14.8	14.8	23.145	0.0023599	2.9446	71505000	4
1168	H3BTH6;Q8NEZ5-3;Q8NEZ5;H3BRE0;Q8NEZ5-2	H3BTH6;Q8NEZ5-3;Q8NEZ5;H3BRE0;Q8NEZ5-2	F-box only protein 22	FBXO22	21.2927	20.3297	19.9594	NaN	21.1575	17.7519	18.0049	NaN	17.6345	20.1916	19.1771	2	2	2	7.5	7.5	7.5	26.408	0.0058183	2.4373	116670000	3
1169	H3BTL2;O14874-2;O14874-3;O14874;H3BS02	H3BTL2;O14874-2;O14874-3;O14874;H3BS02	[3-methyl-2-oxobutanoate dehydrogenase [lipoamide]] kinase, mitochondrial	BCKDK	20.5186	18.642	NaN	NaN	NaN	NaN	20.211	NaN	NaN	NaN	19.9904	2	2	2	14.7	14.7	14.7	24.295	0.0098666	2.1553	86547000	2
1170	H3BU22;Q9NZC3	H3BU22;Q9NZC3	Glycerophosphodiester phosphodiesterase 1	GDE1	22.383	NaN	23.2016	22.3526	22.6111	NaN	21.9594	22.5515	22.2538	22.3464	22.4508	2	2	2	21.3	21.3	21.3	12.06	0	4.8902	420500000	13
1171	H3BUR4;Q9ULX3	H3BUR4;Q9ULX3	RNA-binding protein NOB1	NOB1	NaN	NaN	19.3707	NaN	NaN	20.4671	NaN	NaN	NaN	NaN	NaN	1	1	1	13.6	13.6	13.6	7.5737	0.0084777	2.2443	15009000	1
1172	H3BUV4;Q9NWW5;H3BRN7;H3BNF1;H3BTY4;H3BUT1;Q9NWW5-2	H3BUV4;Q9NWW5;H3BRN7;H3BNF1;H3BTY4;H3BUT1;Q9NWW5-2	Ceroid-lipofuscinosis neuronal protein 6	CLN6	NaN	NaN	21.3478	NaN	NaN	19.6142	21.5355	NaN	18.9849	NaN	NaN	2	2	2	16	16	16	23.475	0	12.143	131560000	3
1173	H3BUV8;Q08397	H3BUV8;Q08397	Lysyl oxidase homolog 1	LOXL1	NaN	NaN	17.7402	NaN	18.395	NaN	NaN	18.4535	NaN	NaN	NaN	2	2	2	7.2	7.2	7.2	46.075	0.00021993	4.3618	27730000	4
1174	H3BUX2;J3KNF8;O43169;D6RFH4;J3QR91	H3BUX2;J3KNF8;O43169;D6RFH4	Cytochrome b5 type B	CYB5B	26.2075	24.9831	23.9203	24.9544	24.2621	24.596	25.1825	25.2111	25.25	24.3716	25.4043	6	6	6	60	60	60	15.716	0	103.44	3357400000	73
1175	H3BV60	H3BV60	Transforming growth factor-beta receptor type 3-like protein	TGFBR3L	NaN	NaN	22.3229	NaN	24.3814	NaN	NaN	NaN	NaN	NaN	NaN	5	5	5	17.4	17.4	17.4	32.819	0	15.905	379400000	11
1176	H3BVC8;Q16651	H3BVC8;Q16651	Prostasin;Prostasin light chain;Prostasin heavy chain	PRSS8	NaN	NaN	NaN	NaN	NaN	NaN	NaN	NaN	NaN	NaN	NaN	1	1	1	13	13	13	11.287	0.0021739	3.0011	0	2
1177	H3BVF7;Q0P6H9;H3BPV2	H3BVF7;Q0P6H9	Transmembrane protein 62	TMEM62	NaN	18.4658	21.4548	17.2862	NaN	NaN	18.5546	15.166	18.567	18.6787	18.7616	4	4	4	9.6	9.6	9.6	61.933	0	5.2933	142670000	7
1178	H3BVI4;B3KS80	H3BVI4;B3KS80	Lipase maturation factor;Lipase maturation factor 1	LMF1	20.9773	21.3976	18.5265	20.1162	21.9225	19.716	NaN	21.2	19.0955	21.3647	NaN	2	2	1	8.9	8.9	2	40.147	0.0063635	2.4062	235860000	2
1179	H6UMI1;O95166;F5GZY7;Q9H0R8;Q9H0R8-2;I3L3J4	H6UMI1;O95166;F5GZY7;Q9H0R8;Q9H0R8-2	Gamma-aminobutyric acid receptor-associated protein;Gamma-aminobutyric acid receptor-associated protein-like 1	GABARAP;GABARAPL1	23.9582	22.0095	24.096	23.0241	23.4963	24.1082	22.7293	21.0458	22.2357	21.1839	22.3505	3	3	2	23.5	23.5	23.5	11.658	0	5.4186	574820000	6
1180	H7C2Z6;H7BXD5;P28676;C9JIZ3;C9JWQ8;C9JV47	H7C2Z6;H7BXD5;P28676;C9JIZ3	Grancalcin	GCA	23.8116	22.1548	23.8342	22.1755	21.3878	24.0866	24.0356	23.8299	23.7906	22.1961	24.0259	9	9	9	61	61	61	16.712	0	71.605	1684000000	61
1181	H7BXI1;A0FGR8-2;A0FGR8-6;A0A087WXU3;A0FGR8;A0FGR8-4;A0FGR8-5	H7BXI1;A0FGR8-2;A0FGR8-6;A0A087WXU3;A0FGR8;A0FGR8-4	Extended synaptotagmin-2	ESYT2	23.2265	22.8516	21.8991	21.9338	21.8022	21.767	22.7545	22.8931	21.9226	22.3258	23.1683	21	20	20	31.2	30.5	30.5	98.008	0	117.99	3614000000	133
1182	H7BXK7;P50452-2;P50452;C9JVA8	H7BXK7;P50452-2;P50452;C9JVA8	Serpin B8	SERPINB8	20.4715	NaN	NaN	19.71	NaN	19.4503	NaN	NaN	20.4201	19.7098	19.2456	4	2	2	22.2	12.7	12.7	21.846	0	7.0262	59099000	3
1183	H7BXR9;Q9BYQ9	H7BXR9;Q9BYQ9	Keratin-associated protein 4-8	KRTAP4-8	NaN	NaN	NaN	NaN	NaN	NaN	NaN	NaN	NaN	NaN	NaN	1	1	1	6.5	6.5	6.5	16.505	0.0023617	2.9548	0	1
1184	H7BXY3;Q7L2E3-3;Q7L2E3;Q7L2E3-2	H7BXY3;Q7L2E3-3;Q7L2E3;Q7L2E3-2	Putative ATP-dependent RNA helicase DHX30	DHX30	19.7187	20.3605	21.1613	19.193	20.9229	15.4593	19.1751	19.4171	18.089	18.7855	19.0857	17	17	17	20.2	20.2	20.2	130.55	0	26.464	851130000	34
1185	H7BY57;O94856-4;O94856-12;O94856-9;X6RKN2;O94856-10;O94856-3;O94856-8;O94856-11;O94856-6;O94856-7;O94856-13;O94856-5;O94856;O94856-2;D6RBU5;D6RHX4;H7C0L6	H7BY57;O94856-4;O94856-12;O94856-9;X6RKN2;O94856-10;O94856-3;O94856-8;O94856-11;O94856-6;O94856-7;O94856-13;O94856-5;O94856;O94856-2	Neurofascin	NFASC	23.2349	NaN	20.4683	22.1285	21.0313	22.6514	17.0036	NaN	NaN	16.2518	NaN	17	17	17	23	23	23	116.59	0	141.55	1451900000	37
1186	H7BY58;P22061;P22061-2;F6S8N6;C9J0F2;H7C4X2;F8WDT3;F8WAV5;F8WAX2	H7BY58;P22061;P22061-2;F6S8N6	Protein-L-isoaspartate O-methyltransferase;Protein-L-isoaspartate(D-aspartate) O-methyltransferase	PCMT1	24.5151	23.9398	24.3788	23.0368	24.2633	24.1565	23.0401	22.4188	23.4904	23.1553	23.2524	9	9	9	45.1	45.1	45.1	30.358	0	149.07	2469100000	56
1187	Q5JRG1;H7BYF2;Q9BVL2-2;Q9BVL2-3;Q9BVL2	Q5JRG1;H7BYF2;Q9BVL2-2;Q9BVL2-3;Q9BVL2	Nucleoporin p58/p45	NUPL1	18.9033	19.7232	20.87	17.8783	20.5333	NaN	18.8695	19.2346	17.2938	19.6334	19.3589	3	3	3	10.2	10.2	10.2	49.095	0	8.072	146300000	7
1188	H7BYY1;F5H7S3;B7Z596;P09493-2;H0YL42;H0YK20	H7BYY1;F5H7S3;B7Z596;P09493-2	Tropomyosin alpha-1 chain	TPM1	24.1715	24.3155	23.6359	23.2203	24.4521	22.6875	22.8367	22.634	22.4899	22.3047	22.6176	21	12	0	55.6	36.7	0	28.747	0	33.612	2891900000	39
1189	H7BZ77;Q9Y3Q8-2;H7C0M8;Q5JRJ0;E7EWD5;H0Y865;Q99576-4;Q99576;Q99576-3;O75157-2;O75157	H7BZ77;Q9Y3Q8-2	TSC22 domain family protein 4	TSC22D4	19.4772	NaN	17.9692	NaN	18.2966	23.3328	18.5653	NaN	NaN	NaN	21.1508	5	5	2	27.5	27.5	9	21.739	0	10.751	218840000	8
1190	H7BZJ3	H7BZJ3		PDIA3	23.9742	22.6208	23.6105	23.1374	24.1656	22.7528	23.3503	22.9546	22.8275	23.2946	23.5485	7	1	1	47.2	11.4	11.4	13.519	0	91.191	1167500000	65
1191	H7BZT8;Q8NDM7-2;Q8NDM7;H0Y4U9;Q5TA04;Q8NDM7-3	H7BZT8;Q8NDM7-2;Q8NDM7;H0Y4U9;Q5TA04;Q8NDM7-3	Cilia- and flagella-associated protein 43	CFAP43	24.0077	NaN	NaN	19.7018	NaN	25.7064	NaN	NaN	18.3277	NaN	18.5054	2	2	2	2.1	2.1	2.1	116.77	0.0016045	3.1929	5655700000	4
1192	H7BZW6;X6RAL5;O00422;U3KPY7;U3KQ12	H7BZW6;X6RAL5;O00422;U3KPY7	Histone deacetylase complex subunit SAP18	SAP18	17.1953	23.3063	23.4225	23.151	22.8624	22.6141	22.1299	23.1583	21.5392	22.0639	21.6927	6	6	6	40.6	40.6	40.6	16.036	0	13.764	747390000	27
1193	H7C124;Q5TEJ8-6;Q5TEJ8-3;Q5TEJ8-5;Q5TEJ8	H7C124;Q5TEJ8-6;Q5TEJ8-3;Q5TEJ8-5;Q5TEJ8	Protein THEMIS2	THEMIS2	NaN	NaN	NaN	NaN	NaN	NaN	16.8405	NaN	NaN	16.8177	16.6751	1	1	1	4.1	4.1	4.1	44.174	0.0081361	2.2725	11742000	1
1194	H7C1E4;P61966;P61966-2;B8ZZZ1;Q96PC3-3;Q96PC3-4;Q96PC3;Q96PC3-2	H7C1E4;P61966;P61966-2	AP-1 complex subunit sigma-1A	AP1S1	18.7094	21.1927	19.9004	20.6567	20.5412	19.9769	20.4485	20.7199	19.5798	20.9247	21.3896	3	3	2	16.8	16.8	13.1	22.065	0	12.548	196140000	15
1195	H7C1U8;Q9BUR5;Q9BUR5-2;G3V1B6	H7C1U8;Q9BUR5;Q9BUR5-2	Apolipoprotein O	APOO	24.1493	22.7102	23.6031	22.8786	24.4079	22.2432	22.5712	24.24	23.6037	23.0889	23.9886	5	5	5	43.3	43.3	43.3	20.08	0	112.58	1580300000	56
1196	H7C270;H7C1Z7;Q9GZU7-3;Q9GZU7-2;Q9GZU7;H7C2S4;H7C3E0;O15194-2;O15194	H7C270;H7C1Z7;Q9GZU7-3;Q9GZU7-2;Q9GZU7;H7C2S4;H7C3E0;O15194-2;O15194	Carboxy-terminal domain RNA polymerase II polypeptide A small phosphatase 1;CTD small phosphatase-like protein	CTDSP1;CTDSPL	21.9297	20.673	20.1588	NaN	20.1866	NaN	NaN	19.3072	NaN	NaN	20.4478	2	2	2	8.7	8.7	8.7	28.395	0.0016048	3.1971	111200000	2
1197	H7C209;Q8N8A2;Q8N8A2-2;H7C3P1;Q8N8A2-4	H7C209;Q8N8A2;Q8N8A2-2;H7C3P1;Q8N8A2-4	Serine/threonine-protein phosphatase 6 regulatory ankyrin repeat subunit B	ANKRD44	16.5645	NaN	17.2946	NaN	16.6284	15.9759	NaN	NaN	NaN	NaN	16.553	2	2	2	2.3	2.3	2.3	85.604	0.0097194	2.1769	32699000	2
1198	H7C268;Q9H0V1-2;Q9H0V1	H7C268;Q9H0V1-2;Q9H0V1	Transmembrane protein 168	TMEM168	20.422	20.739	NaN	18.5135	18.4755	NaN	20.4934	20.533	20.123	19.4172	19.7796	3	3	3	19	19	19	29.105	0	5.4198	110450000	4
1199	H7C285;O95858	H7C285;O95858	Tetraspanin-15	TSPAN15	18.7388	NaN	NaN	NaN	NaN	NaN	22.4887	21.4655	21.2313	22.2419	22.8592	4	4	4	35.6	35.6	35.6	18.219	0	12.625	193990000	10
1200	H7C2Q8;Q99848	H7C2Q8;Q99848	Probable rRNA-processing protein EBP2	EBNA1BP2	18.1432	20.3142	18.0988	19.6865	18.124	16.5574	17.22	18.0564	17.2379	19.0562	NaN	2	2	2	6.4	6.4	6.4	40.684	0	5.8621	98507000	2
1201	H7C2U8;Q9H0X4	H7C2U8;Q9H0X4	Protein ITFG3	ITFG3	20.9148	20.1735	19.1311	20.7738	20.4561	NaN	NaN	20.2755	NaN	NaN	NaN	1	1	1	6.8	6.8	6.8	20.934	0.00021404	4.0145	85303000	3
1202	H7C3D8;Q7Z7K0;C9JES7	H7C3D8;Q7Z7K0;C9JES7	COX assembly mitochondrial protein homolog	CMC1	NaN	NaN	NaN	NaN	20.3277	NaN	NaN	NaN	NaN	20.7713	20.4814	3	3	3	31.9	31.9	31.9	13.078	0	6.2403	36557000	5
1203	H7C3F4;Q9NWH9-3;Q9NWH9;H0YKH2;H7BXE3	H7C3F4;Q9NWH9-3;Q9NWH9;H0YKH2;H7BXE3	SAFB-like transcription modulator	SLTM	NaN	NaN	20.5227	NaN	18.2311	17.7479	NaN	NaN	NaN	NaN	NaN	2	2	2	3.8	3.8	3.8	70.491	0	6.2635	83640000	3
1204	H7C3F5;O75175-3;O75175-2;O75175;H0Y5X7;H7C148	H7C3F5;O75175-3;O75175-2;O75175;H0Y5X7;H7C148	CCR4-NOT transcription complex subunit 3	CNOT3	22.7855	NaN	19.5794	NaN	NaN	NaN	NaN	21.9866	NaN	NaN	22.2774	2	2	2	9.1	9.1	9.1	58.866	0.0036758	2.7583	260180000	2
1205	H7C3S5;Q9C0K7-3;Q9C0K7-2;Q9C0K7	H7C3S5;Q9C0K7-3;Q9C0K7-2;Q9C0K7	STE20-related kinase adapter protein beta	STRADB	NaN	NaN	20.7884	NaN	NaN	NaN	NaN	NaN	NaN	21.3903	NaN	1	1	1	14.6	14.6	14.6	10.067	0.0097159	2.1742	22798000	1
1206	H7C3X5;Q13190-3;Q13190-2;Q13190-4;Q13190;E9PNU4	H7C3X5;Q13190-3;Q13190-2;Q13190-4;Q13190;E9PNU4	Syntaxin-5	STX5	20.5135	20.0559	19.8909	19.635	20.0955	NaN	NaN	19.529	18.1855	18.9003	19.2954	2	2	2	24.1	24.1	24.1	17.5	0.00042499	3.885	76808000	2
1207	H7C5E4;Q8IZH2-2;Q8IZH2	H7C5E4;Q8IZH2-2;Q8IZH2	5-3 exoribonuclease 1	XRN1	NaN	NaN	18.0683	NaN	17.5792	NaN	NaN	NaN	NaN	NaN	14.9028	4	4	4	4	4	4	130.08	0	6.7241	32084000	5
1208	H7C5G1;Q2TAA2-2;Q2TAA2;C9JDY4;C9J5J2;C9JE02	H7C5G1;Q2TAA2-2;Q2TAA2;C9JDY4;C9J5J2;C9JE02	Isoamyl acetate-hydrolyzing esterase 1 homolog	IAH1	NaN	19.9603	18.6344	NaN	19.8747	17.844	16.906	NaN	15.8994	16.4195	NaN	2	2	2	15.8	15.8	15.8	25.085	0.0093647	2.187	36482000	3
1209	H7C5R8;Q460N5-4;Q460N5-1;Q460N5;Q460N5-3;Q460N5-5;H7C4Y3	H7C5R8;Q460N5-4;Q460N5-1;Q460N5;Q460N5-3	Poly [ADP-ribose] polymerase 14	PARP14	16.5159	13.6954	NaN	14.3826	16.6021	18.9278	17.1878	16.3717	17.1934	16.7128	18.7927	11	11	11	9.1	9.1	9.1	171.15	0	18.331	208110000	22
1210	H8YS97;O96014	H8YS97;O96014	Protein Wnt;Protein Wnt-11	WNT11	NaN	NaN	19.8296	21.8615	NaN	NaN	NaN	NaN	NaN	NaN	NaN	1	1	1	5.3	5.3	5.3	29.533	0	13.894	71131000	2
1211	H9KV31;O15394;O15394-2	H9KV31;O15394	Neural cell adhesion molecule 2	NCAM2	23.6144	NaN	NaN	NaN	17.4574	24.1301	17.44	15.7374	NaN	NaN	14.4936	19	19	19	30.3	30.3	30.3	91.122	0	100.49	2066000000	61
1212	H9KVB1;Q01196;Q01196-9;Q01196-10;Q01196-2;Q01196-8;C9JWM1;A8MZI9;Q01196-6;Q01196-5;Q01196-7;Q01196-3;Q01196-4;Q01196-11	H9KVB1;Q01196;Q01196-9;Q01196-10;Q01196-2;Q01196-8;C9JWM1;A8MZI9;Q01196-6;Q01196-5;Q01196-7;Q01196-3;Q01196-4	Runt-related transcription factor 1	RUNX1	22.0095	22.4805	18.2661	23.0223	NaN	NaN	21.2197	22.7493	21.8161	23.2375	22.9403	3	3	3	10.3	10.3	10.3	41.426	0.0008273	3.5296	754420000	9
1213	I3L0K9;Q15027	I3L0K9;Q15027	Arf-GAP with coiled-coil, ANK repeat and PH domain-containing protein 1	ACAP1	NaN	NaN	NaN	NaN	NaN	NaN	NaN	NaN	NaN	NaN	NaN	1	1	1	12.2	12.2	12.2	17.004	0	26.599	13128000	1
1214	I3L354;I3L0L0;Q13950-3;Q13950-2;Q13950;Q13761;Q13761-2	I3L354;I3L0L0;Q13950-3;Q13950-2;Q13950;Q13761;Q13761-2	Runt-related transcription factor 2;Runt-related transcription factor 3	RUNX2;RUNX3	NaN	NaN	NaN	20.0817	NaN	NaN	18.8213	18.9873	17.4564	19.7148	18.0952	2	2	2	10.1	10.1	10.1	30.15	0.0015994	3.1397	45820000	1
1215	I3L0N3;P46459;P46459-2;I3L2G1;I3L0L3;K7EQD6;I3L4Q9;I3L338	I3L0N3;P46459;P46459-2	Vesicle-fusing ATPase	NSF	23.1989	20.725	25.6966	22.2181	25.1865	23.238	22.2015	19.1046	21.1874	21.7818	21.9228	35	35	34	49.1	49.1	48.2	82.091	0	172.9	7866900000	161
1216	I3L1D5;O15296;O15296-3;O15296-4;O15296-2	I3L1D5;O15296;O15296-3;O15296-4;O15296-2	Arachidonate 15-lipoxygenase B	ALOX15B	NaN	NaN	15.3363	16.9197	NaN	NaN	21.3095	16.0947	22.4122	21.8421	19.0934	11	11	11	23.3	23.3	23.3	74.486	0	36.717	483920000	23
1217	I3L1H5;Q9BZG8-3;Q9BZG8-2;Q9BZG8;I3L3X9	I3L1H5;Q9BZG8-3;Q9BZG8-2;Q9BZG8;I3L3X9	Diphthamide biosynthesis protein 1	DPH1	NaN	NaN	NaN	17.7816	NaN	NaN	NaN	NaN	NaN	NaN	NaN	2	2	2	4.9	4.9	4.9	47.313	0.005298	2.5303	6759700	2
1218	I3L1P8;Q02978;Q02978-2	I3L1P8;Q02978;Q02978-2	Mitochondrial 2-oxoglutarate/malate carrier protein	SLC25A11	26.9853	25.6649	26.2091	25.8181	26.2519	25.3475	26.3061	26.2478	26.2182	25.7173	26.4055	16	16	16	54.7	54.7	54.7	32.182	0	245.11	17193000000	313
1219	I3L297;P46108-2;P46108	I3L297;P46108-2;P46108	Adapter molecule crk	CRK	20.8185	22.7007	19.6113	21.8121	19.9838	22.9292	21.8207	20.8023	21.6509	21.9369	19.3971	6	6	6	43.9	43.9	43.9	25.503	0	24.789	576750000	26
1220	I3L2T3;J3KMW6;Q9UJH8	I3L2T3;J3KMW6;Q9UJH8	Meteorin	METRN	NaN	NaN	21.6942	NaN	21.4349	NaN	NaN	NaN	NaN	NaN	NaN	1	1	1	8	8	8	18.544	0.00021959	4.3293	37368000	3
1221	I3L2X1;Q9BYC9;Q9BYC9-2	I3L2X1;Q9BYC9;Q9BYC9-2	39S ribosomal protein L20, mitochondrial	MRPL20	23.384	22.6056	22.2068	21.5796	20.4635	NaN	22.6199	20.8477	23.2312	21.626	21.7264	2	2	2	31.8	31.8	31.8	7.5961	0	5.2351	207340000	12
1222	I3L397;I3L504;P63241;P63241-2;Q6IS14;F8WCJ1;C9J7B5;C9J4W5;Q9GZV4	I3L397;I3L504;P63241;P63241-2;Q6IS14	Eukaryotic translation initiation factor 5A;Eukaryotic translation initiation factor 5A-1;Eukaryotic translation initiation factor 5A-1-like	EIF5A;EIF5AL1	23.5037	25.5019	24.9561	25.3556	24.7529	24.6824	25.7855	23.2108	24.9723	25.4157	24.3205	10	10	10	65.3	65.3	65.3	16.118	0	80.524	3130600000	126
1223	I3L3E4;I3L4G8;I3L4A1;Q96FZ7	I3L3E4;I3L4G8;I3L4A1;Q96FZ7	Charged multivesicular body protein 6	CHMP6	23.1586	NaN	23.0909	22.9515	23.3008	21.6321	NaN	22.397	21.7587	NaN	NaN	2	2	2	22.1	22.1	22.1	12.939	0	7.989	357600000	13
1224	I3L3P7;P62244;H3BVC7	I3L3P7;P62244	40S ribosomal protein S15a	RPS15A	26.2004	26.3468	27.1679	25.7563	27.1645	25.1321	26.8131	26.1137	25.7146	26.275	26.0393	7	7	3	60	60	22	11.477	0	43.995	8746800000	127
1225	I3L4N6;Q9UP95-5;Q9UP95-2;Q9UP95-6;Q9UP95;Q9UP95-7;Q9UP95-3;Q9UP95-4;J3QSF2	I3L4N6;Q9UP95-5;Q9UP95-2;Q9UP95-6;Q9UP95;Q9UP95-7;Q9UP95-3	Solute carrier family 12 member 4	SLC12A4	20.4057	20.3227	20.5429	20.444	19.5229	19.3624	21.2942	21.1874	20.9033	20.5973	20.0015	12	12	8	13.3	13.3	9.8	115.05	0	19.546	842300000	48
1226	I6L894;D6RHE1;E9PCH6;H0Y931;Q01484-7;H0Y8Y2;D6R9U4;H0YAG3;D6RIY9	I6L894;D6RHE1		ANK2	NaN	NaN	13.5471	NaN	NaN	15.8561	NaN	NaN	NaN	NaN	NaN	46	1	1	16.3	0.7	0.7	430.25	0	12.575	20152000	1
1227	J3KMZ8;Q92785-2;Q92785;E9PN04	J3KMZ8;Q92785-2;Q92785;E9PN04	Zinc finger protein ubi-d4	DPF2	NaN	19.7974	19.1931	18.747	19.1897	NaN	15.289	19.0685	NaN	NaN	16.6572	4	4	4	13.1	13.1	13.1	45.78	0	8.4763	86075000	10
1228	J3KN10;P42356;P42356-2;C9JLI1	J3KN10;P42356	Phosphatidylinositol 4-kinase alpha	PI4KA	18.9179	16.3146	18.6279	16.8992	17.8987	18.1749	18.2057	18.8273	18.6337	17.5908	19.0197	11	11	11	7.8	7.8	7.8	236.83	0	13.759	490920000	27
1229	J3KN16;Q5VYK3;R4GMY1;R4GMY3;F6XAQ5	J3KN16;Q5VYK3;R4GMY1	Proteasome-associated protein ECM29 homolog	KIAA0368;ECM29	14.6474	18.0237	19.5135	16.6015	19.4951	16.6029	17.398	16.532	15.9881	18.5371	16.506	15	15	15	11	11	11	223.69	0	31.358	362010000	25
1230	J3KN32;Q9UKL0;Q9P2K3-4;Q9P2K3;Q9P2K3-3;E9PQE5;H0YF22;B4DV59;Q9P2K3-2	J3KN32;Q9UKL0;Q9P2K3-4;Q9P2K3;Q9P2K3-3	REST corepressor 1;REST corepressor 3	RCOR1;RCOR3	NaN	18.9951	18.6739	NaN	18.2554	NaN	NaN	17.2258	16.9301	NaN	NaN	3	3	3	8.9	8.9	8.9	53.327	0.00021487	4.0507	44422000	5
1231	S4R3Q9;J3KNA0;Q15070-2;Q15070;E7EVY0;C9JC63;Q15070-3	S4R3Q9;J3KNA0;Q15070-2;Q15070;E7EVY0;C9JC63;Q15070-3	Mitochondrial inner membrane protein OXA1L	OXA1L	22.7941	22.0578	21.4849	21.9604	21.6783	18.6137	22.0524	22.073	22.7276	22.1733	22.5441	8	8	8	17.7	17.7	17.7	48.519	0	28.258	893840000	30
1232	J3KNB4;P49913	J3KNB4;P49913	Cathelicidin antimicrobial peptide;Antibacterial protein FALL-39;Antibacterial protein LL-37	CAMP	23.175	20.2271	20.114	19.9271	21.1228	17.9518	23.2801	23.0407	23.9501	21.516	22.6423	6	6	6	26.6	26.6	26.6	19.591	0	66.185	798400000	38
1233	J3KNF5;O15078;O15078-2	J3KNF5;O15078;O15078-2	Centrosomal protein of 290 kDa	CEP290	17.8493	19.1615	18.4069	19.3867	18.637	16.2057	NaN	16.4996	NaN	18.6212	17.2266	5	4	4	1.7	1.5	1.5	290.54	0.00022282	4.5349	555770000	17
1234	J3KNG6;Q08AE8-4;Q08AE8-3;Q08AE8-5;Q08AE8-2;Q08AE8;K7EMJ7	J3KNG6;Q08AE8-4;Q08AE8-3;Q08AE8-5;Q08AE8-2;Q08AE8;K7EMJ7	Protein spire homolog 1	SPIRE1	NaN	NaN	NaN	NaN	NaN	18.833	NaN	NaN	NaN	NaN	NaN	2	2	2	4.2	4.2	4.2	62.914	0.0014205	3.3087	15410000	2
1235	J3KNI1;Q9H9E3;Q9H9E3-3;Q9H9E3-2;J3QLW1;E9PRT5;H3BSD2;H3BQB2;J3KRB5;H3BMV9	J3KNI1;Q9H9E3;Q9H9E3-3;Q9H9E3-2	Conserved oligomeric Golgi complex subunit 4	COG4	NaN	18.7367	20.2028	NaN	19.7602	17.2658	17.8484	16.5377	NaN	18.3268	NaN	7	7	7	13.1	13.1	13.1	89.5	0	21.538	189920000	9
1236	J3KNJ3;Q9Y3Q0	J3KNJ3;Q9Y3Q0	N-acetylated-alpha-linked acidic dipeptidase 2	NAALAD2	NaN	NaN	18.1473	NaN	18.7711	NaN	NaN	NaN	NaN	NaN	NaN	3	3	3	5.7	5.7	5.7	80.163	0.00021801	4.2432	30246000	3
1237	J3KNL2;Q8WYJ6;Q8WYJ6-2	J3KNL2;Q8WYJ6	Septin-1	2001-09-01	NaN	NaN	NaN	NaN	NaN	NaN	NaN	NaN	NaN	NaN	NaN	3	3	3	7.5	7.5	7.5	46.918	0.0002264	4.7907	41537000	3
1238	J3KNL6;O15027-2;O15027-4;O15027-3;O15027;O15027-5;X6RGP5;Q8N9G1	J3KNL6;O15027-2;O15027-4;O15027-3;O15027;O15027-5;X6RGP5	Protein transport protein Sec16A	SEC16A	20.0575	19.7455	21.1552	20.1881	21.2496	18.973	20.194	19.8973	19.124	20.5345	20.34	19	19	19	11.6	11.6	11.6	251.89	0	35.815	1495800000	42
1239	J3KNN5;Q9UJV9;H0Y8L8	J3KNN5;Q9UJV9;H0Y8L8	Probable ATP-dependent RNA helicase DDX41	DDX41	20.5135	21.7111	19.0203	21.6306	18.235	19.7897	21.1173	20.7682	21.6537	20.8534	20.757	6	6	6	10.2	10.2	10.2	71.648	0	8.6718	1124000000	15
1240	J3KNQ4;Q9NVD7;E9PS97;A0A087WZB5;Q9HBI1-3;Q9HBI1;Q9HBI1-2;Q9NVD7-2	J3KNQ4;Q9NVD7;E9PS97	Alpha-parvin	PARVA	18.6894	20.0629	18.8025	19.41	21.1859	20.3059	19.4535	17.5953	NaN	18.9366	NaN	6	6	6	18	18	18	46.589	0	11.402	205840000	15
1241	J3KNV4;Q13683-9;Q13683-7;Q13683-3;Q13683;Q13683-10;Q13683-13;G3V2I4;G3V2C6;H0YJ26;H0YJ98	J3KNV4;Q13683-9;Q13683-7;Q13683-3;Q13683;Q13683-10;Q13683-13	Integrin alpha-7;Integrin alpha-7 heavy chain;Integrin alpha-7 light chain;Integrin alpha-7 70 kDa form	ITGA7	22.1901	NaN	18.3755	16.9143	18.0115	22.5151	16.8591	16.352	18.8467	NaN	16.2353	12	12	12	13.4	13.4	13.4	123.63	0	64.257	866570000	21
1242	J3KNV5;Q75QN2-2;Q75QN2;H0YC12;H0YBS1;E5RJL5;E5RJF0;H0YBQ1;E5RIN8;E5RG48	J3KNV5;Q75QN2-2;Q75QN2;H0YC12;H0YBS1	Integrator complex subunit 8	INTS8	NaN	16.4195	18.1448	15.9621	17.5989	18.1983	NaN	15.2239	NaN	15.6296	15.7344	3	3	3	5.4	5.4	5.4	85.729	0.0014216	3.3247	49868000	4
1243	J3KNW4;Q14192;C9J3S8;F8WDA8;U3KQT4;Q14192-2	J3KNW4;Q14192	Four and a half LIM domains protein 2	FHL2	23.8565	23.8167	23.1587	24.1388	22.4971	21.5061	23.6117	23.4362	22.4686	23.5706	23.6033	13	13	13	39.6	39.6	39.6	44.205	0	98.971	3965700000	74
1244	J3QL05;J3KP15;Q01130-2;Q01130;Q9BRL6-2;Q9BRL6	J3QL05;J3KP15;Q01130-2;Q01130	Serine/arginine-rich splicing factor 2	SRSF2	24.78	26.029	26.17	25.9088	26.5983	21.4635	24.0416	25.7508	24.2022	25.2469	23.379	5	5	5	43.1	43.1	43.1	15.156	0	68.063	3553400000	62
1245	J3KPP4;O95232;D6RDI2;D6RHH0;U3KQT3;E7EN55;C9JL41;O95232-2	J3KPP4;O95232	Luc7-like protein 3	LUC7L3	22.488	21.6051	23.2264	20.4302	22.9429	21.9963	21.1935	21.3382	20.5927	21.0704	20.6406	6	6	5	14.3	14.3	13.1	58.22	0	33.877	1152300000	19
1246	J3KPT4;Q9H4I3;Q9H4I3-2	J3KPT4;Q9H4I3;Q9H4I3-2	TraB domain-containing protein	TRABD	20.1663	17.6264	NaN	NaN	18.0522	NaN	20.5595	19.1471	18.1643	18.6581	18.6528	2	2	2	6.6	6.6	6.6	42.692	0.00021753	4.2077	122540000	7
1247	J3KPX7;Q99623;F5GY37;Q99623-2;F5GWA7;F5H3X6;F5H0C5;F5H2D2;U3KPZ5	J3KPX7;Q99623;F5GY37;Q99623-2;F5GWA7;F5H3X6	Prohibitin-2	PHB2	27.1889	27.3243	26.1584	26.2708	26.4427	25.0779	27.4473	26.8484	27.3644	26.6295	27.2398	17	17	17	59.7	59.7	59.7	33.239	0	323.31	38030000000	537
1248	J3KQ32;Q9NTK5;Q9NTK5-2;Q9NTK5-3;C9JCJ9;C9JTK6	J3KQ32;Q9NTK5;Q9NTK5-2;Q9NTK5-3	Obg-like ATPase 1	OLA1	20.9619	21.6717	22.4057	21.1088	22.1321	20.8232	21.0946	19.7289	20.0748	21.389	19.4679	14	14	14	42.8	42.8	42.8	46.937	0	47.406	832300000	44
1249	J3KQ48;Q9Y3E5	J3KQ48;Q9Y3E5	Peptidyl-tRNA hydrolase 2, mitochondrial	PTRH2	23.0278	22.6661	22.4446	22.8043	22.348	22.5305	23.103	23.2904	22.6755	22.5824	22.8698	4	4	4	35	35	35	19.325	0	149.98	994180000	49
1250	J3KQ52;P10144	J3KQ52;P10144	Granzyme B	GZMB	18.2678	NaN	18.3019	NaN	17.5556	NaN	19.139	18.839	19.3862	NaN	18.3406	2	2	1	9.8	9.8	5.1	26.417	0.008817	2.1923	61145000	2
1251	J3KQ99;P20036;H0Y6F8	J3KQ99;P20036;H0Y6F8	HLA class II histocompatibility antigen, DP alpha 1 chain	HLA-DPA1	23.8866	19.8	22.9187	19.0219	18.3791	21.5699	22.338	18.911	21.8059	18.3233	19.1074	4	3	3	25.4	19.6	19.6	24.059	0	37.718	552190000	19
1252	J3KQA0;P21579;Q8N9I0	J3KQA0;P21579	Synaptotagmin-1	SYT1	23.5628	16.899	21.277	19.1694	23.4012	19.8525	NaN	NaN	NaN	NaN	NaN	12	9	9	28.4	21.7	21.7	47.26	0	21.612	694670000	26
1253	J3KQI6;Q9BX79;Q9BX79-6;Q9BX79-5;Q9BX79-4;Q9BX79-3;I3NI08;I3L2B6;Q9BX79-2	J3KQI6;Q9BX79;Q9BX79-6;Q9BX79-5;Q9BX79-4;Q9BX79-3	Stimulated by retinoic acid gene 6 protein homolog	STRA6	20.3933	NaN	NaN	NaN	NaN	17.7847	20.0125	19.9442	20.6542	NaN	20.5426	5	5	5	10.8	10.8	10.8	72.647	0	8.7532	249390000	12
1254	J3KQJ1;Q8NBJ7;A8MXB9;Q8NBJ7-2;E9PBT8;C9JL30;C9J660;F8WA42;Q8NBJ7-3;J3QT17;H7C3B2;Q8NBJ7-5;F8WEX5;E9PG02;F8WEV7;F8WES7;Q8NBJ7-4	J3KQJ1;Q8NBJ7;A8MXB9;Q8NBJ7-2;E9PBT8;C9JL30;C9J660;F8WA42;Q8NBJ7-3;J3QT17;H7C3B2;Q8NBJ7-5	Sulfatase-modifying factor 2	SUMF2	22.021	20.6556	22.2432	21.9638	22.6991	22.111	21.2036	20.3918	18.4075	19.0939	20.7657	6	6	6	20	20	20	35.922	0	16.628	634620000	29
1255	J3KQL8	J3KQL8		APOL2	20.9406	18.8489	19.4638	19.1029	20.1562	19.8833	19.8113	19.5592	19.5468	NaN	19.0522	9	1	1	20.9	3.8	3.8	48.915	0.0023613	2.9522	250620000	4
1256	M0QXG9;M0R0I0;J3KQS6;Q9NWV8-3;Q9NWV8-2;Q9NWV8	M0QXG9;M0R0I0;J3KQS6;Q9NWV8-3;Q9NWV8-2;Q9NWV8	BRISC and BRCA1-A complex member 1	BABAM1	NaN	18.4523	18.396	NaN	18.7519	NaN	NaN	NaN	NaN	NaN	NaN	1	1	1	10.3	10.3	10.3	21.019	0.00021617	4.1459	12596000	1
1257	J3KR69;Q9H892;Q9H892-2;A8MTE9;C9JYU1;E9PP06;C9JPY5;E9PIS6;E9PJI9;C9J1D2;E9PKU6	J3KR69;Q9H892;Q9H892-2;A8MTE9	Tetratricopeptide repeat protein 12	TTC12	16.5786	20.0327	NaN	20.4086	NaN	17.7932	18.4325	20.2696	18.3353	20.6659	18.7904	3	3	3	5.1	5.1	5.1	79.483	0.0012277	3.407	356470000	5
1258	J3KR97;Q9BTW9;Q9BTW9-4;I3L163;I3L439;I3L4D2;I3L3H4;I3L131;I3L143;I3L0V3;I3L500;I3L120;Q9BTW9-3;Q9BTW9-5;Q9BTW9-2	J3KR97;Q9BTW9;Q9BTW9-4;I3L163;I3L439	Tubulin-specific chaperone D	TBCD	14.8694	16.5487	18.7374	17.351	17.3064	19.1028	NaN	NaN	16.7849	17.2733	NaN	6	6	6	6.3	6.3	6.3	136.55	0	11.403	140510000	7
1259	J3KRR7;Q9NQC7-2;Q9NQC7;H3BTB8;H3BSW9;H3BS09	J3KRR7;Q9NQC7-2;Q9NQC7;H3BTB8;H3BSW9;H3BS09	Ubiquitin carboxyl-terminal hydrolase CYLD	CYLD	NaN	NaN	17.7662	NaN	17.8357	17.1235	NaN	NaN	NaN	NaN	NaN	2	2	2	2.4	2.4	2.4	101.9	0.0034884	2.7778	29382000	2
1260	J3KRT0;J3KS23;Q13951;Q13951-2	J3KRT0;J3KS23;Q13951;Q13951-2	Core-binding factor subunit beta	CBFB	NaN	21.8326	NaN	20.2949	NaN	NaN	20.446	22.4931	20.453	NaN	NaN	1	1	1	26.2	26.2	26.2	7.3251	0	6.2997	55154000	5
1261	J3QLB2;J3KRX2;J3QS49;Q8N1S5-2;Q8N1S5;J3QQP1;J3QRN3;J3KS66;J3QLA9	J3QLB2;J3KRX2;J3QS49;Q8N1S5-2;Q8N1S5;J3QQP1;J3QRN3;J3KS66;J3QLA9	Zinc transporter ZIP11	SLC39A11	21.0031	20.2979	NaN	21.1363	17.8931	NaN	21.1917	21.2781	20.2847	20.4957	20.2842	2	2	2	18.8	18.8	18.8	19.35	0	9.3242	188170000	18
1262	J3QQS6;J3QR93;J3KRZ9;Q9H3Q1-2;Q9H3Q1	J3QQS6;J3QR93;J3KRZ9;Q9H3Q1-2;Q9H3Q1	Cdc42 effector protein 4	CDC42EP4	NaN	NaN	19.5765	NaN	NaN	NaN	NaN	NaN	NaN	19.2849	NaN	1	1	1	21.9	21.9	21.9	7.8025	0.004959	2.6114	7102800	2
1263	J3KS15;Q14197;J3QRF8	J3KS15;Q14197	Peptidyl-tRNA hydrolase ICT1, mitochondrial	ICT1	20.4293	NaN	19.03	NaN	NaN	NaN	20.5095	20.4979	20.566	18.0327	20.6185	3	3	3	20.8	20.8	20.8	21.905	0.00022139	4.4457	116910000	6
1264	J3KS22;Q7Z4W1;J3QS36;J3QL34;J3QS45;J3KRZ4;J3KSZ5;J3QRQ2	J3KS22;Q7Z4W1;J3QS36;J3QL34;J3QS45;J3KRZ4;J3KSZ5	L-xylulose reductase	DCXR	24.6332	23.1998	24.9195	23.1986	24.3316	22.3436	24.2367	24.0911	24.8271	23.3766	24.5235	10	10	10	57.6	57.6	57.6	23.96	0	51.328	3307200000	109
1265	J3QRG5;J3KSJ5;Q9BQA9-2;Q9BQA9;J3KTF4;J3QKS6;J3QRZ2;J3QLB7;J3QQQ4;J3QS53;J3QKZ6;H0Y2X1;J3KTI1;J3KSB6;J3KS78	J3QRG5;J3KSJ5;Q9BQA9-2;Q9BQA9;J3KTF4;J3QKS6;J3QRZ2;J3QLB7	Uncharacterized protein C17orf62	C17orf62	24.8812	24.0309	23.6228	22.8497	23.2226	24.3081	24.7275	23.1793	24.5321	24.0109	23.6713	6	6	6	42.6	42.6	42.6	16.754	0	27.658	2305300000	30
1266	J3KSP6;Q8N0W3;Q8N0W3-2;J3KTP6	J3KSP6;Q8N0W3;Q8N0W3-2;J3KTP6	L-fucose kinase	FUK	17.4683	15.8334	18.2082	NaN	18.8365	NaN	NaN	NaN	NaN	NaN	NaN	4	4	4	9.2	9.2	9.2	62.219	0	6.4302	37440000	4
1267	J3QRT6;J3KSZ7;O43236-5;O43236-2;O43236-3;O43236;O43236-4;J3QRU3;J3QLR2;J3QLA8;O43236-6	J3QRT6;J3KSZ7;O43236-5;O43236-2;O43236-3;O43236;O43236-4;J3QRU3;J3QLR2;J3QLA8;O43236-6	Septin-4	2004-09-01	19.5158	NaN	16.9578	NaN	17.737	20.8316	NaN	21.6016	22.4583	21.7269	21.5046	4	4	4	15.4	15.4	15.4	38.429	0	9.546	461950000	5
1268	J3KTA1;Q96IG2-2;Q96IG2;Q9UKC9	J3KTA1;Q96IG2-2;Q96IG2;Q9UKC9	F-box/LRR-repeat protein 20;F-box/LRR-repeat protein 2	FBXL20;FBXL2	NaN	NaN	NaN	NaN	16.332	NaN	NaN	NaN	NaN	NaN	16.7295	2	2	2	4.3	4.3	4.3	48.575	0.0081391	2.2741	5352300	2
1269	J3KTA4;P17844;P17844-2;J3QRQ7;J3KRZ1;J3QSF1;J3KRX8;J3QR02;X6RLV5;J3QRN5;J3QLG9;J3QR62	J3KTA4;P17844;P17844-2	Probable ATP-dependent RNA helicase DDX5	DDX5	22.5744	23.3254	24.0676	22.9314	24.16	21.9706	21.7993	23.2366	21.5511	21.8732	22.65	28	20	20	49.5	37.3	37.3	69.086	0	69.022	3438300000	137
1270	J3QR09;J3KTE4;P84098;J3QL15	J3QR09;J3KTE4;P84098	Ribosomal protein L19;60S ribosomal protein L19	RPL19	25.4554	27.1383	26.4772	26.5782	26.4492	24.9555	24.9438	26.8199	25.0469	26.4334	24.5509	4	4	4	22.3	22.3	22.3	23.134	0	86.516	7628900000	76
1271	J3KTF8;J3QQX2;P52565;J3KRE2;J3KRY1;P52565-2;J3KS60	J3KTF8;J3QQX2;P52565;J3KRE2;J3KRY1;P52565-2;J3KS60	Rho GDP-dissociation inhibitor 1	ARHGDIA	23.2475	23.4579	24.5419	23.8992	23.8894	24.2624	19.8402	22.5752	21.1968	22.4136	21.5503	6	6	6	41.8	41.8	41.8	21.614	0	63.291	1486200000	21
1272	J3KTL2;Q07955;Q07955-3;Q07955-2;J3KSR8;J3QQV5;J3KSW7	J3KTL2;Q07955;Q07955-3;Q07955-2;J3KSR8	Serine/arginine-rich splicing factor 1	SRSF1	25.9408	26.2449	26.0919	24.4408	26.2799	23.8219	23.9227	25.634	24.3788	24.7524	24.9841	16	16	15	44.7	44.7	41.9	28.329	0	117.56	8686200000	258
1273	J3QK89;Q8IWX8	J3QK89;Q8IWX8	Calcium homeostasis endoplasmic reticulum protein	CHERP	20.0077	21.0391	20.6389	20.3126	21.4247	19.0544	17.5975	19.6598	NaN	19.3025	18.4506	5	5	5	5.4	5.4	5.4	104.93	0	16.743	438330000	13
1274	J3QL56;O75880	J3QL56;O75880	Protein SCO1 homolog, mitochondrial	SCO1	22.6163	21.6934	22.2291	NaN	22.1644	25.4842	21.4534	22.1303	22.2528	21.6914	22.578	5	5	5	20.7	20.7	20.7	30.178	0	18.44	1554600000	12
1275	J3QLS3;Q9Y2R9;J3KSI8;J3QQS1;J3QKW2	J3QLS3;Q9Y2R9;J3KSI8;J3QQS1;J3QKW2	28S ribosomal protein S7, mitochondrial	MRPS7	22.0799	19.5608	22.1856	21.4591	22.8311	19.5408	22.1643	22.4931	22.1187	21.4723	22.2353	7	7	7	26.2	26.2	26.2	31.704	0	21.584	896380000	32
1276	J3QLU9;P04626-5;P04626-4;P04626;B4DTR1;P04626-6;F5H1T4;P04626-3;P04626-2;J3KS21;J3QRX1;J3QL83;J3KRI9;J3QLV2;J3KTI5;H3BLT0;Q15303-4;Q15303-3;Q15303-2;Q15303	J3QLU9;P04626-5;P04626-4;P04626;B4DTR1;P04626-6;F5H1T4	Receptor protein-tyrosine kinase;Receptor tyrosine-protein kinase erbB-2	ERBB2	21.0207	19.9652	NaN	18.9121	16.6	19.0212	19.6174	20.0668	19.5362	18.3645	18.8994	7	6	6	7	5.9	5.9	117.1	0	11.161	372720000	18
1277	J3QQJ5;Q9Y2L5-2;Q9Y2L5;J3QR00;J3QSA1;J3KSL8	J3QQJ5;Q9Y2L5-2;Q9Y2L5;J3QR00;J3QSA1;J3KSL8	Trafficking protein particle complex subunit 8	TRAPPC8	NaN	NaN	15.9532	NaN	15.9392	NaN	NaN	NaN	NaN	18.3009	NaN	2	2	2	2.3	2.3	2.3	154.98	0.009872	2.1582	35488000	3
1278	J3QQN7;Q8N9F7-3;Q8N9F7-2;Q8N9F7;J3KTA9	J3QQN7;Q8N9F7-3;Q8N9F7-2;Q8N9F7;J3KTA9	Glycerophosphodiester phosphodiesterase domain-containing protein 1	GDPD1	18.5246	NaN	19.2723	NaN	19.9887	NaN	19.0381	NaN	17.3042	NaN	NaN	2	2	2	16.7	16.7	16.7	23.956	0.0021726	2.9963	41263000	7
1279	J3QRI7;J3QQQ9;J3QQV1;J3QRC4;P61254;J3KTJ8;J3KSS0;J3KS10	J3QRI7;J3QQQ9;J3QQV1;J3QRC4;P61254;J3KTJ8;J3KSS0	60S ribosomal protein L26	RPL26	25.9943	26.4353	25.7578	25.4142	25.5645	19.3801	25.2356	25.8919	24.6401	25.8477	25.4726	8	2	2	57.9	9.3	9.3	12.63	0	6.5295	4692300000	20
1280	J3QQW9;Q15022	J3QQW9;Q15022	Polycomb protein SUZ12	SUZ12	19.4706	21.0687	18.6536	18.7716	17.9335	17.4063	21.3694	14.6597	18.4127	19.9988	18.4708	2	2	2	2.2	2.2	2.2	80.321	0.007453	2.3568	376840000	3
1281	J3QQX3;J3QKZ8;J3QQW7	J3QQX3		FDXR	18.9284	NaN	NaN	17.6341	NaN	NaN	19.86	18.8393	19.0365	17.5232	18.9071	18	2	1	45.6	7.8	5.2	50.619	0.001979	3.0248	100220000	4
1282	J3QQY2;J9JIE6;Q9UM00-2;Q9UM00;J3KS45	J3QQY2;J9JIE6;Q9UM00-2;Q9UM00	Transmembrane and coiled-coil domain-containing protein 1	TMCO1	24.1307	23.4112	23.5725	24.2127	23.4718	22.868	24.3905	23.8924	24.0081	24.1012	23.7551	3	3	3	35.6	35.6	35.6	11.372	0	14.1	935740000	29
1283	J3QQZ1;P35499;A8K0U1;Q99250-2;Q99250	J3QQZ1;P35499;A8K0U1;Q99250-2;Q99250	Sodium channel protein;Sodium channel protein type 4 subunit alpha;Sodium channel protein type 2 subunit alpha	SCN4A;SCN2A	NaN	NaN	NaN	NaN	NaN	19.3713	NaN	NaN	NaN	NaN	NaN	2	2	2	1	1	1	208.18	0.0016013	3.1544	40691000	2
1284	J3QR07;Q96MU7-2;Q96MU7	J3QR07;Q96MU7-2;Q96MU7	YTH domain-containing protein 1	YTHDC1	20.1417	20.8576	21.6017	20.054	21.0064	17.6947	19.4547	20.6052	17.6547	19.5476	19.7576	4	4	4	5.4	5.4	5.4	85.586	0	6.5525	512200000	16
1285	J3QRD6;J3QRR4;Q9Y221;J3QLW7;Q9Y221-2	J3QRD6;J3QRR4;Q9Y221;J3QLW7;Q9Y221-2	60S ribosome subunit biogenesis protein NIP7 homolog	NIP7	22.3609	22.4041	20.2566	20.8632	NaN	20.5312	21.1739	20.8221	19.0751	21.87	20.0907	2	2	2	47.1	47.1	47.1	7.9962	0	5.2537	78430000	6
1286	J3QRG1;Q6PK18;Q6PK18-2;K7ENS7	J3QRG1;Q6PK18;Q6PK18-2;K7ENS7	2-oxoglutarate and iron-dependent oxygenase domain-containing protein 3	OGFOD3	NaN	18.5152	18.8557	NaN	NaN	NaN	NaN	NaN	NaN	NaN	NaN	2	2	2	7.5	7.5	7.5	27.151	0.0040501	2.7057	11886000	2
1287	J3QRG6;P42771;P42771-4;K7ES20;K7ENC6;P42771-2;P42772	J3QRG6;P42771;P42771-4;K7ES20;K7ENC6;P42771-2	Cyclin-dependent kinase inhibitor 2A	CDKN2A	NaN	18.055	20.9951	NaN	NaN	21.9272	NaN	NaN	NaN	NaN	NaN	3	3	3	25.4	25.4	25.4	14.968	0	4.9819	44452000	8
1288	J3QRI1;Q9BVV7	J3QRI1;Q9BVV7	Mitochondrial import inner membrane translocase subunit Tim21	TIMM21	21.4582	17.8953	19.6695	NaN	19.9426	NaN	21.4757	NaN	NaN	NaN	20.9287	1	1	1	11	11	11	14.247	0.0023548	2.9252	77582000	3
1289	J3QRM9;Q8N138-4;Q8N138	J3QRM9;Q8N138-4;Q8N138	ORM1-like protein 3	ORMDL3	NaN	23.0565	22.8109	22.8849	23.3374	22.7206	21.1964	22.2993	20.8034	22.9351	22.0122	2	2	1	20.2	20.2	11.6	14.788	0	16.259	328210000	12
1290	J3QRS3;P19105;O14950	J3QRS3;P19105;O14950	Myosin regulatory light chain 12A;Myosin regulatory light chain 12B	MYL12A;MYL12B	27.2827	27.1891	26.1246	26.1986	26.6854	26.0023	27.1417	26.8744	26.438	27.371	27.0856	11	11	5	61	61	28.8	20.457	0	323.31	18637000000	513
1291	J3QRS9;X6R4W8;O43670-2;O43670;O43670-4;O43670-3;J3KS31;J3QS27;J3KTL1;J3KRB6;J3KRW6;H0Y3M2	J3QRS9;X6R4W8;O43670-2;O43670;O43670-4;O43670-3	BUB3-interacting and GLEBS motif-containing protein ZNF207	ZNF207	21.5557	21.8292	22.9895	20.0257	23.0971	19.2543	21.3721	20.4255	21.6343	21.1774	21.5323	5	5	5	12.4	12.4	12.4	52.541	0	21.758	778210000	19
1292	J3QRU1;P07947;P06241-3;P06241-2;P06241	J3QRU1;P07947;P06241-3;P06241-2;P06241	Non-specific protein-tyrosine kinase;Tyrosine-protein kinase Yes;Tyrosine-protein kinase Fyn	YES1;FYN	20.8028	20.1373	19.2715	18.8212	19.7913	18.5896	18.6285	19.3146	17.6972	17.4987	17.6729	6	2	2	12.4	4.7	4.7	61.386	0	5.2274	218370000	8
1293	J3QRU8;Q9Y2X7;Q9Y2X7-3;J3QLH1;K7EN79;J3QL89	J3QRU8;Q9Y2X7;Q9Y2X7-3	ARF GTPase-activating protein GIT1	GIT1	18.8606	19.5448	19.4537	19.4399	20.2059	18.9768	19.1319	NaN	18.2365	19.0195	18.6682	6	6	4	9.9	9.9	6.5	76.805	0	8.8281	335860000	12
1294	J9JIC7;J3QSH4;Q14119	J9JIC7;J3QSH4;Q14119	Vascular endothelial zinc finger 1	VEZF1	NaN	19.5221	NaN	19.3433	19.1784	NaN	NaN	NaN	NaN	NaN	NaN	1	1	1	5	5	5	37.32	0.00022553	4.7348	32181000	5
1295	J3QSV6;O76021;I3L3C4;I3L3U9;I3L234;O76021-2;I3L1A3	J3QSV6;O76021;I3L3C4;I3L3U9	Ribosomal L1 domain-containing protein 1	RSL1D1	23.1238	24.4335	22.1911	23.4712	22.2347	21.3781	22.2477	23.405	21.7848	23.2011	22.6071	10	10	10	25.6	25.6	25.6	48.208	0	23.526	2326400000	34
1296	J3QT28;O43684-2;O43684;J3QSX4	J3QT28;O43684-2;O43684;J3QSX4	Mitotic checkpoint protein BUB3	BUB3	22.4998	23.3926	24.5834	23.6616	23.9476	22.1474	22.6013	22.1207	22.2239	22.9666	23.2042	10	10	10	48.2	48.2	48.2	31.703	0	102.26	1778600000	62
1297	J3QT38;Q9Y2D4-2;Q9Y2D4	J3QT38;Q9Y2D4-2;Q9Y2D4	Exocyst complex component 6B	EXOC6B	17.1465	NaN	16.8111	NaN	16.091	16.5822	18.3085	17.8818	18.0029	17.0189	17.1662	2	2	2	3.7	3.7	3.7	79.368	0.00042391	3.8431	67617000	5
1298	J3QT77;Q15165-3;Q15165-1;Q15165;G3XAK4	J3QT77;Q15165-3;Q15165-1;Q15165;G3XAK4	Serum paraoxonase/arylesterase 2	PON2	24.3377	23.2689	23.3867	23.1233	23.6322	24.9761	23.156	23.9792	22.8367	22.183	23.0641	9	9	9	46.2	46.2	46.2	37.98	0	95.158	3089500000	120
1299	J3QTA2;Q99933-4;Q99933-3;Q99933;Q99933-2	J3QTA2;Q99933-4;Q99933-3;Q99933;Q99933-2	BAG family molecular chaperone regulator 1	BAG1	19.0725	NaN	18.1495	17.6763	NaN	NaN	18.6799	18.8992	18.7479	18.1421	NaN	2	2	2	7.8	7.8	7.8	38.76	0	6.2058	53798000	5
1300	J3QTA6;Q9BRQ6;J3QTB2;H0Y922	J3QTA6;Q9BRQ6;J3QTB2;H0Y922	MICOS complex subunit MIC25	CHCHD6	24.3031	22.9711	22.4522	22.7572	23.7266	22.4467	22.6397	24.0398	23.7683	22.2118	22.5601	8	8	8	41.4	41.4	41.4	28.817	0	90.696	1966800000	42
1301	J9JID7	J9JID7		LMNB2	26.0388	26.9464	26.9864	25.8972	27.2215	24.4986	25.2491	25.7911	25.6128	24.9843	25.5127	45	43	1	56.1	54.7	1.9	69.948	0	323.31	34864000000	443
1302	K4DI93;Q13620-3;Q13620-1;Q13620;A6NE76;A0A087WWN2	K4DI93;Q13620-3;Q13620-1;Q13620	Cullin-4B	CUL4B	18.9219	19.9579	21.8345	19.1513	21.4421	17.2222	18.329	18.83	18.0005	17.1119	17.878	18	18	9	21.1	21.1	11.7	102.75	0	34.534	640830000	29
1303	K7EM02;K7EIJ8;Q8IYT4-2;Q8IYT4	K7EM02;K7EIJ8;Q8IYT4-2;Q8IYT4	Katanin p60 ATPase-containing subunit A-like 2	KATNAL2	24.2733	23.9147	24.7802	23.2074	24.9463	23.1399	24.6444	23.6127	23.6813	24.33	24.1762	1	1	1	9.4	9.4	9.4	13.999	0.0042121	2.6444	2082700000	21
1304	K7EIK7;O95834;O95834-2;O95834-3;C9JRL6;K7EII6;K7EKG3;K7EIM1;K7EQR0;K7ERY9;K7EKU5;K7ERR2;K7ELI8	K7EIK7;O95834;O95834-2;O95834-3;C9JRL6;K7EII6;K7EKG3	Echinoderm microtubule-associated protein-like 2	EML2	17.5626	19.2907	19.3543	19.9208	20.2308	16.6949	20.3027	18.0143	20.7002	17.4535	17.6658	6	6	6	12	12	12	84.729	0	37.429	283730000	12
1305	K7EIN2;Q9BRJ7;K7ENA3;W4VSQ8;Q9BRJ7-2	K7EIN2;Q9BRJ7;K7ENA3;W4VSQ8;Q9BRJ7-2	Protein syndesmos	NUDT16L1	21.2176	20.7691	22.2381	21.3629	22.8816	23.7855	16.3976	NaN	NaN	17.2024	17.7364	7	7	6	45.5	45.5	39.9	21.809	0	29.199	524120000	24
1306	K7EIP7;K7ERW0;Q9BWQ6;K7ENM8;K7EQH3;K7ENZ5	K7EIP7;K7ERW0;Q9BWQ6;K7ENM8	Protein YIPF;Protein YIPF2	YIPF2	NaN	23.3581	21.5345	20.6932	21.5146	NaN	NaN	23.227	NaN	NaN	NaN	3	3	3	25.8	25.8	25.8	20.715	0	7.4438	226390000	4
1307	K7EKV3;K7EQL9;K7EM70;K7EIS2;Q9BSG5;Q9BSG5-3;Q9BSG5-2;K7EN64;K7ENA4;K7ESG0	K7EKV3;K7EQL9;K7EM70;K7EIS2;Q9BSG5;Q9BSG5-3;Q9BSG5-2;K7EN64;K7ENA4;K7ESG0	Retbindin	RTBDN	NaN	NaN	20.9804	NaN	22.8761	NaN	NaN	NaN	NaN	NaN	NaN	2	2	2	17.2	17.2	17.2	20.344	0	5.2076	68370000	5
1308	K7EIY6;Q9BV68-2;Q9BV68	K7EIY6;Q9BV68-2;Q9BV68	E3 ubiquitin-protein ligase RNF126	RNF126	NaN	19.2301	NaN	20.463	NaN	19.8386	19.829	20.2028	19.5319	20.2565	20.3385	1	1	1	8.5	8.5	8.5	30.872	0	5.762	67782000	6
1309	S4R456;K7EM56;K7EJ78;S4R417;K7EQJ5;K7ELC2;P62841	S4R456;K7EM56;K7EJ78;S4R417;K7EQJ5;K7ELC2;P62841	40S ribosomal protein S15	RPS15	27.1668	27.487	27.0355	27.1018	26.8529	25.4738	26.4652	26.7184	25.991	27.0163	25.645	3	3	3	47.1	47.1	47.1	8.0266	0	41.536	5245600000	46
1310	K7EPN1;K7EJ96;K7EPS3;Q9GZN7	K7EPN1;K7EJ96;K7EPS3;Q9GZN7	Protein rogdi homolog	ROGDI	NaN	NaN	19.5075	NaN	19.682	18.4634	NaN	NaN	NaN	NaN	NaN	1	1	1	11.1	11.1	11.1	19.071	0	7.233	21427000	4
1311	K7EJC2;Q9P107;Q9P107-2	K7EJC2;Q9P107;Q9P107-2	GEM-interacting protein	GMIP	NaN	NaN	NaN	NaN	NaN	NaN	NaN	NaN	NaN	NaN	NaN	2	2	2	10.2	10.2	10.2	33.139	0	8.1407	6936000	2
1312	K7EJE8;K7EKE6;P36776-2;P36776;P36776-3;K7ER27;K7ERR6;K7EQF8;K7ER56	K7EJE8;K7EKE6;P36776-2;P36776;P36776-3	Lon protease homolog, mitochondrial	LONP1	24.3134	23.4493	24.2346	22.3416	24.0386	22.656	23.9602	23.3994	23.7184	23.574	23.7192	30	30	30	44.1	44.1	44.1	93.296	0	111.22	7240300000	241
1313	K7EJH8	K7EJH8		ACTN4	20.8131	19.704	NaN	19.3756	NaN	20.0525	NaN	17.896	18.1234	18.7661	NaN	13	1	1	68.1	8.8	8.8	21.43	0.0015898	3.0895	73906000	3
1314	K7EK00;Q96ND0;K7ERQ2	K7EK00;Q96ND0;K7ERQ2	Protein FAM210A	FAM210A	20.9301	17.0936	20.3353	16.89	20.1966	NaN	21.166	21.6066	21.5208	20.3821	21.3822	3	3	3	10.8	10.8	10.8	30.292	0	6.202	322990000	8
1315	K7EK07;P84243;Q16695;K7EMV3;B4DEB1;K7ES00;Q6NXT2;K7EP01	K7EK07;P84243;Q16695;K7EMV3;B4DEB1;K7ES00;Q6NXT2;K7EP01	Histone H3;Histone H3.3;Histone H3.1t;Histone H3.3C	H3F3B;H3F3A;HIST3H3;H3F3C	31.9165	32.6153	31.7979	32.1969	32.2756	30.9932	31.5178	31.6252	31.3026	31.5297	31.2091	10	10	1	60.6	60.6	24.2	14.914	0	323.31	280840000000	226
1316	K7EQ02;K7EQ55;K7EK33;Q96EP5-2;Q96EP5	K7EQ02;K7EQ55;K7EK33;Q96EP5-2;Q96EP5	DAZ-associated protein 1	DAZAP1	NaN	21.8771	22.7816	22.5001	23.1701	NaN	21.167	20.1422	NaN	21.5655	NaN	5	5	5	20.8	20.8	20.8	35.02	0	30.514	419610000	16
1317	K7EK42;Q99426;K7EL99;K7EP07;Q99426-2	K7EK42;Q99426;K7EL99;K7EP07;Q99426-2	Tubulin-folding cofactor B	TBCB	NaN	20.6651	20.3178	19.2479	20.0491	20.6546	NaN	16.9882	NaN	18.741	17.4979	2	2	2	9.4	9.4	9.4	21.296	0.0014102	3.2303	84923000	5
1318	K7EK60;O95466;O95466-2;O95466-3	K7EK60;O95466;O95466-2;O95466-3	Formin-like protein 1	FMNL1	18.8753	NaN	NaN	NaN	NaN	18.237	18.9703	NaN	NaN	17.4719	18.1707	2	1	1	3.2	2.2	2.2	74.601	0.0081436	2.2851	110710000	1
1319	K7EKD1	K7EKD1		GFAP	28.3452	NaN	NaN	23.4534	NaN	29.8449	NaN	NaN	NaN	NaN	NaN	8	2	2	80.7	24.6	24.6	6.5992	0	221.6	6952600000	30
1320	K7EKI8;O60437;K7EQ71;REV__H7C1E6;M0QZ12;REV__Q8NDI1-3;REV__Q8NDI1-2;REV__Q8NDI1;Q96CP6-2;Q96CP6-3;Q96CP6	K7EKI8;O60437;K7EQ71	Periplakin	PPL	24.3873	22.5529	20.4925	22.908	20.5382	19.8736	23.9867	24.3637	24.3956	22.8298	22.0354	76	76	76	48.2	48.2	48.2	204.49	0	323.31	15006000000	426
1321	K7EL81;Q9BZL4-2;Q9BZL4-3;Q9BZL4-4;Q9BZL4	K7EL81;Q9BZL4-2;Q9BZL4-3;Q9BZL4-4;Q9BZL4	Protein phosphatase 1 regulatory subunit 12C	PPP1R12C	NaN	NaN	NaN	NaN	NaN	NaN	NaN	NaN	NaN	NaN	NaN	1	1	1	2.6	2.6	2.6	80.199	0.0016093	3.215	0	2
1322	K7ELH8;Q6ZPD9;Q8N6Q4;K7ELG1;Q6ZPD9-2	K7ELH8;Q6ZPD9	Probable C-mannosyltransferase DPY19L3	DPY19L3	19.7499	19.7963	21.1358	18.5611	21.1077	20.7563	17.5408	NaN	18.1817	NaN	18.5412	3	3	3	6	6	6	79.509	0	10.445	320480000	5
1323	K7ELL7;P14314-2;P14314;K7EPW7;K7EKX1;K7EJ70	K7ELL7;P14314-2;P14314	Glucosidase 2 subunit beta	PRKCSH	24.9376	25.012	24.9062	24.7159	25.3441	23.923	25.2147	24.6694	24.9982	24.5425	24.5514	16	16	16	33.8	33.8	33.8	60.192	0	175.82	7851600000	195
1324	K7ELQ9;Q6UW68;K7EM09;K7EPR0;K7ER05;K7EJQ9	K7ELQ9;Q6UW68;K7EM09;K7EPR0	Transmembrane protein 205	TMEM205	26.5866	25.9847	25.6457	25.867	25.9205	25.7053	26.0889	25.996	26.139	25.2253	25.3656	3	3	3	22.9	22.9	22.9	19.27	0	128.13	4781700000	49
1325	K7ELV2;Q96EE3;Q96EE3-1;K7ENI5;K7EP88;K7EPZ5	K7ELV2;Q96EE3;Q96EE3-1;K7ENI5;K7EP88	Nucleoporin SEH1	SEH1L	19.9021	22.184	22.4125	21.0443	23.0429	19.0982	19.9623	20.6716	19.7993	20.874	21.1368	6	6	6	33.8	33.8	33.8	29.541	0	48.086	570600000	21
1326	K7EM18;P41567;O60739	K7EM18;P41567;O60739	Eukaryotic translation initiation factor 1;Eukaryotic translation initiation factor 1b	EIF1;EIF1B	21.6646	21.6209	22.5187	NaN	22.5738	20.852	19.0151	20.8643	21.0671	20.3278	NaN	2	2	2	24.8	24.8	24.8	13.607	0	15.445	164920000	8
1327	K7EN45;Q13526	K7EN45;Q13526	Peptidyl-prolyl cis-trans isomerase NIMA-interacting 1	PIN1	18.6567	19.7568	21.6547	NaN	21.0481	NaN	NaN	17.8536	NaN	18.949	NaN	2	2	2	37.8	37.8	37.8	9.8329	0.00021622	4.148	37559000	2
1328	V9GZ55;K7ENR6;Q969U7-2;Q969U7;K7ER45	V9GZ55;K7ENR6;Q969U7-2;Q969U7	Proteasome assembly chaperone 2	PSMG2	21.319	21.1946	19.266	NaN	16.4193	22.0245	NaN	NaN	NaN	17.9605	NaN	3	3	3	12	12	12	23.506	0	6.2639	136520000	3
1329	K7EP06;O43148;O43148-2;K7ERH6	K7EP06;O43148;O43148-2;K7ERH6	mRNA cap guanine-N7 methyltransferase	RNMT	NaN	18.3589	20.3352	NaN	19.6026	NaN	NaN	NaN	NaN	NaN	NaN	2	2	2	9.1	9.1	9.1	34.839	0.00021839	4.2692	39282000	3
1330	K7EP90;Q9BTD8-4;Q9BTD8-2;Q9BTD8-3;Q9BTD8;K7EQ03;K7ER08;K7EML2	K7EP90;Q9BTD8-4;Q9BTD8-2;Q9BTD8-3;Q9BTD8;K7EQ03;K7ER08	RNA-binding protein 42	RBM42	NaN	19.1571	19.829	17.017	19.4833	NaN	NaN	17.6439	16.412	NaN	NaN	5	5	5	15.3	15.3	15.3	48.024	0	19.14	50796000	8
1331	K7EPL2;Q9UBT2;Q9UBT2-2	K7EPL2;Q9UBT2	SUMO-activating enzyme subunit 2	UBA2	NaN	20.045	19.6095	18.4919	19.8111	17.7733	NaN	NaN	NaN	NaN	NaN	3	3	3	14.1	14.1	14.1	29.385	0	5.2783	54309000	7
1332	K7ER15;Q9H0R4;K7EMY7;Q9H0R4-2;K7EQD2;K7EJQ8	K7ER15;Q9H0R4;K7EMY7;Q9H0R4-2;K7EQD2	Haloacid dehalogenase-like hydrolase domain-containing protein 2	HDHD2	20.8646	20.5727	21.2542	19.5161	21.5755	22.4083	18.957	17.9091	18.507	18.2828	NaN	4	4	4	34.8	34.8	34.8	22.49	0	8.6892	225430000	17
1333	K7ERE1;Q8N2U0;K7ENI6;K7ESI7	K7ERE1;Q8N2U0;K7ENI6	Transmembrane protein 256	TMEM256	23.3444	22.7961	21.8967	21.5361	21.7876	NaN	22.7021	22.857	23.5252	NaN	NaN	3	3	3	76.5	76.5	76.5	7.1301	0	11.119	164970000	3
1334	K7ERG3	K7ERG3		TPM4	20.4733	21.5555	NaN	NaN	20.7345	NaN	21.3217	NaN	NaN	NaN	NaN	13	1	1	50	8.8	8.8	19.306	0.0065408	2.3921	133550000	2
1335	K7ERI9;P02654;K7EKP1;K7EJI9;K7ELM9;K7EPF9	K7ERI9;P02654;K7EKP1;K7EJI9;K7ELM9;K7EPF9	Apolipoprotein C-I;Truncated apolipoprotein C-I	APOC1	25.0982	26.3528	24.7476	27.1943	25.8632	25.7358	26.3729	23.6127	20.8906	24.6723	26.3122	4	4	4	28.6	28.6	28.6	8.647	0	10.095	2104300000	39
1336	K7ES02;Q13867;K7ESE8;J3KSD8;J3KS79;K7ENH5	K7ES02;Q13867;K7ESE8;J3KSD8	Bleomycin hydrolase	BLMH	22.0531	21.5202	20.6322	21.328	21.5264	19.7481	19.7857	17.586	18.2199	19.3026	17.8155	3	3	3	9.4	9.4	9.4	37.198	0.00021612	4.1426	380610000	4
1337	K7ES61;Q9BYD3;K7ELQ0;X6RAY8;Q9BYD3-2;K7EKI4;K7ELF1;K7EJ73	K7ES61;Q9BYD3;K7ELQ0;X6RAY8;Q9BYD3-2;K7EKI4;K7ELF1	39S ribosomal protein L4, mitochondrial	MRPL4	21.9105	20.3831	21.9932	20.0234	22.0911	18.8288	22.4964	22.4863	22.7607	21.4719	22.8969	7	7	7	32.3	32.3	32.3	33.792	0	35.827	817180000	38
1338	K7ES70;P55083;P55083-2;REV__Q9P2D8-2;REV__G3V2U4;REV__Q9P2D8;REV__Q9P2D8-3	K7ES70;P55083;P55083-2	Microfibril-associated glycoprotein 4	MFAP4	25.1356	22.9785	21.392	18.252	20.8106	25.1018	22.7782	24.9268	24.257	NaN	22.4596	6	6	6	35	35	35	31.326	0	50.25	2147400000	55
1339	K7ESE6;Q9BUM1	K7ESE6;Q9BUM1	Glucose-6-phosphatase 3	G6PC3	20.8722	NaN	20.5923	20.1107	20.7294	20.9491	NaN	NaN	NaN	NaN	NaN	2	2	2	8.2	8.2	8.2	27.607	0.0040486	2.7045	75558000	2
1340	K7ESP4;Q8WVC6;Q8WVC6-2	K7ESP4;Q8WVC6	Dephospho-CoA kinase domain-containing protein	DCAKD	24.3044	24.2523	24.0639	24.1178	24.3605	24.4465	21.5965	23.5024	23.3598	21.4984	22.2878	10	10	10	47.8	47.8	47.8	24.177	0	45.771	2102000000	75
1341	K7N7A8;P29972;P29972-4;P29972-2;P29972-3	K7N7A8;P29972;P29972-4;P29972-2;P29972-3	Aquaporin-1	AQP1	22.8989	NaN	NaN	20.9043	NaN	22.2763	NaN	18.5964	NaN	NaN	NaN	2	2	2	7.8	7.8	7.8	48.685	0	160.73	200330000	17
1342	L0R6Q1	L0R6Q1		SLC35A4	23.7356	23.3924	20.7111	23.4741	21.3755	21.8415	23.8328	23.9916	24.0725	23.5293	23.5419	4	4	4	43.7	43.7	43.7	11.133	0	14.133	775560000	57
1343	M0QWZ7;Q9NP81;Q9NP81-2;M0R2C6;M0R259;M0QX29;B4DJM9;M0R2H5;M0R1C0	M0QWZ7;Q9NP81;Q9NP81-2;M0R2C6;M0R259	Serine--tRNA ligase, mitochondrial	SARS2	22.4689	21.818	21.1623	20.9951	21.4503	18.7719	22.409	21.9694	21.9105	20.9984	21.937	12	12	12	31.3	31.3	31.3	58.182	0	70.71	1324900000	42
1344	M0QX71;Q9BQ67	M0QX71;Q9BQ67	Glutamate-rich WD repeat-containing protein 1	GRWD1	19.2421	20.0427	17.8833	18.9548	NaN	18.3919	18.8258	NaN	NaN	18.9529	19.0301	2	2	2	14	14	14	25.477	0.0002207	4.41	68805000	9
1345	M0QXA7;O95785-2;O95785-4;O95785-3;O95785	M0QXA7;O95785-2;O95785-4;O95785-3;O95785	Protein Wiz	WIZ	NaN	16.9336	NaN	NaN	NaN	NaN	18.7029	17.4833	NaN	NaN	18.6683	2	2	2	2.9	2.9	2.9	103.28	0.0014127	3.2418	70255000	2
1346	M0QXB4;O14579;A0A087X0I4;O14579-3;O14579-2;M0R061	M0QXB4;O14579;A0A087X0I4;O14579-3;O14579-2	Coatomer subunit epsilon	COPE	22.7881	22.315	23.7601	21.7392	23.5275	21.3196	23.0692	22.397	22.0054	22.7742	22.8816	9	9	9	34.4	34.4	34.4	36.923	0	43.464	1959100000	58
1347	M0QXD0;Q9GZU1	M0QXD0;Q9GZU1	Mucolipin-1	MCOLN1	NaN	NaN	19.6144	NaN	19.2494	NaN	NaN	NaN	NaN	NaN	NaN	2	2	2	14.5	14.5	14.5	22.18	0	7.1274	15684000	2
1348	M0QXZ5;Q96B54	M0QXZ5;Q96B54	Zinc finger protein 428	ZNF428	NaN	22.9109	22.0479	21.6812	21.9535	NaN	NaN	NaN	NaN	NaN	NaN	3	3	3	20.6	20.6	20.6	23.568	0	22.164	137520000	8
1349	M0QY65;Q9Y286-4;Q9Y286-3;Q9Y286-2;Q9Y286	M0QY65;Q9Y286-4;Q9Y286-3;Q9Y286-2;Q9Y286	Sialic acid-binding Ig-like lectin 7	SIGLEC7	NaN	NaN	NaN	NaN	NaN	NaN	NaN	NaN	NaN	NaN	NaN	1	1	1	9.2	9.2	9.2	21.184	0	83.522	34998000	2
1350	M0QY97;Q9UPT8	M0QY97;Q9UPT8	Zinc finger CCCH domain-containing protein 4	ZC3H4	NaN	16.1391	NaN	NaN	16.4264	NaN	NaN	14.7571	NaN	14.9947	15.5394	1	1	1	1.8	1.8	1.8	95.425	0.00062383	3.5964	11533000	4
1351	M0R2P8;M0R3A4;M0QYA2;Q9NWS0	M0R2P8;M0R3A4;M0QYA2;Q9NWS0	PIH1 domain-containing protein 1	PIH1D1	NaN	NaN	20.4167	20.2148	19.7638	NaN	NaN	NaN	18.8782	NaN	19.873	1	1	1	12.3	12.3	12.3	13.148	0.005294	2.5259	39591000	2
1352	M0R0N4;M0QYZ2;P53680;M0QZ21;X6R390;P53680-2;M0R1S0	M0R0N4;M0QYZ2;P53680;M0QZ21;X6R390;P53680-2;M0R1S0	AP-2 complex subunit sigma	AP2S1	25.3202	24.4345	25.0829	23.7059	23.7924	25.5774	24.2895	24.7059	23.3389	23.5659	25.4579	4	4	4	27.1	27.1	27.1	17.303	0	13.463	2322800000	34
1353	M0QZ24;O00754-2;O00754	M0QZ24;O00754-2;O00754	Lysosomal alpha-mannosidase;Lysosomal alpha-mannosidase A peptide;Lysosomal alpha-mannosidase B peptide;Lysosomal alpha-mannosidase C peptide;Lysosomal alpha-mannosidase D peptide;Lysosomal alpha-mannosidase E peptide	MAN2B1	NaN	20.6496	19.9722	19.9007	20.5522	NaN	20.9588	19.72	20.1201	20.0332	20.0139	1	1	1	8.1	8.1	8.1	21.543	0	9.0378	139100000	5
1354	M0QZ66;P54852;M0R122;M0QXN1	M0QZ66;P54852;M0R122;M0QXN1	Epithelial membrane protein 3	EMP3	21.6109	19.7621	NaN	21.1291	18.7033	23.2876	NaN	18.6623	17.3141	NaN	20.3033	2	2	2	24.4	24.4	24.4	10.371	0.00062228	3.5625	116860000	11
1355	M0QZD8	M0QZD8			17.8636	NaN	13.9155	17.8926	15.3247	16.7354	17.5157	17.9863	16.7733	17.3465	17.3099	1	1	1	0.6	0.6	0.6	354.22	0.0042194	2.6622	318270000	16
1356	M0QZH0;Q96D15;M0QYB8	M0QZH0;Q96D15;M0QYB8	Reticulocalbin-3	RCN3	19.1205	20.133	21.3757	19.5229	19.3169	NaN	20.0174	17.7218	NaN	NaN	20.1331	3	3	3	23.1	23.1	23.1	19.813	0	5.7415	106050000	6
1357	M0QZP7;Q9NW81-5;Q9NW81;Q9NW81-4	M0QZP7;Q9NW81-5;Q9NW81;Q9NW81-4	ATP synthase subunit s-like protein	ATP5SL	20.3398	NaN	NaN	NaN	NaN	NaN	NaN	20.8542	20.4881	20.8835	21.8268	1	1	1	8	8	8	16.836	0.002365	2.9653	62086000	3
1358	M0QZR4;Q92888;Q92888-3;Q92888-2;Q6NX52;M0QYC1;M0R2C7;M0QYS3;M0R3H5;M0QZH8	M0QZR4;Q92888;Q92888-3;Q92888-2;Q6NX52;M0QYC1	Rho guanine nucleotide exchange factor 1	ARHGEF1	20.49	20.357	18.8476	21.2691	NaN	19.4284	18.7062	17.2122	20.4712	17.3934	17.9532	7	7	7	8.3	8.3	8.3	108.32	0	13.395	513340000	12
1359	M0QZS6;Q9UBE0;M0QX65;B3KNJ4;Q9UBE0-2;Q9UBE0-3;M0R054	M0QZS6;Q9UBE0;M0QX65;B3KNJ4;Q9UBE0-2;Q9UBE0-3	SUMO-activating enzyme subunit 1;SUMO-activating enzyme subunit 1, N-terminally processed	SAE1	NaN	19.9672	19.4939	19.3084	19.8833	17.499	NaN	NaN	NaN	NaN	NaN	3	3	3	10.9	10.9	10.9	29.422	0.00082457	3.4818	67733000	5
1360	M0R0F0;P46782;M0R0R2;M0QZN2	M0R0F0;P46782;M0R0R2;M0QZN2	40S ribosomal protein S5;40S ribosomal protein S5, N-terminally processed	RPS5	25.9924	26.6016	26.4166	26.24	26.7521	24.6903	25.492	25.7942	24.9632	26.2747	25.2166	11	11	11	51.5	51.5	51.5	22.391	0	146.99	7858200000	235
1361	M0R0J1;Q9H4M7-2;Q9H4M7	M0R0J1;Q9H4M7-2;Q9H4M7	Pleckstrin homology domain-containing family A member 4	PLEKHA4	NaN	NaN	NaN	NaN	NaN	20.5175	NaN	NaN	NaN	NaN	NaN	1	1	1	10.9	10.9	10.9	21.788	0.0027322	2.857	18012000	1
1362	M0R300;M0R0P8;Q13459-2;Q13459;M0QZY4;M0R2J3;M0R332;M0QXP0;H3BRD5;B2RTY4-2;B2RTY4;B2RTY4-4;M0R240;H3BMM1;B2RTY4-3;B2RTY4-5	M0R300;M0R0P8;Q13459-2;Q13459	Unconventional myosin-IXb	MYO9B	19.1218	20.0637	17.4011	19.2015	20.0864	17.6604	18.9414	18.8302	18.0446	17.872	18.7853	11	11	11	6.9	6.9	6.9	234.23	0	32.749	1005300000	17
1363	M0R0P9;P31751-2;P31751;J3QL45;M0R283;M0QZW8;J3QKW1	M0R0P9;P31751-2;P31751;J3QL45;M0R283	RAC-beta serine/threonine-protein kinase	AKT2	NaN	19.5224	18.7207	18.4525	18.272	21.6791	17.5578	NaN	NaN	17.4643	17.6131	4	4	3	9.6	9.6	7.8	51.571	0	10.364	196940000	10
1364	M0R116;P13637;P13637-2;P13637-3;M0QXF2	M0R116;P13637;P13637-2;P13637-3	Sodium/potassium-transporting ATPase subunit alpha-3	ATP1A3	25.79	NaN	22.0663	19.0463	22.7753	22.6745	16.5751	NaN	NaN	14.5061	NaN	36	18	17	44	22.3	20.7	108.28	0	281.93	4348900000	65
1365	M0R165;Q9UBC2-4;Q9UBC2-3;Q9UBC2;Q9UBC2-2;M0R2S2;K7EJR2;M0R330;M0QX30;M0R1V5	M0R165;Q9UBC2-4;Q9UBC2-3;Q9UBC2;Q9UBC2-2;M0R2S2	Epidermal growth factor receptor substrate 15-like 1	EPS15L1	20.0873	19.6462	21.294	21.7121	20.572	19.3049	21.2547	20.8719	19.396	19.6861	19.3539	8	8	8	12	12	12	83.474	0	26.482	864530000	31
1366	M0R175;P10588	M0R175;P10588	Nuclear receptor subfamily 2 group F member 6	NR2F6	NaN	NaN	NaN	NaN	19.105	NaN	NaN	19.7894	NaN	NaN	NaN	1	1	1	14.4	14.4	14.4	12.814	0.0097123	2.1734	7350200	2
1367	M0R1L7;O43633;M0R1T5;M0QXX8	M0R1L7;O43633;M0R1T5	Charged multivesicular body protein 2a	CHMP2A	23.1549	22.2372	22.0672	21.5148	22.4845	23.6727	21.5286	22.0299	22.6369	22.2004	22.1295	4	4	4	20.8	20.8	20.8	18.739	0	6.5915	862330000	18
1368	M0R1Y2;P24390-2;P33947-2;P33947;P24390	M0R1Y2;P24390-2;P33947-2;P33947;P24390	ER lumen protein-retaining receptor;ER lumen protein-retaining receptor 1;ER lumen protein-retaining receptor 2	KDELR1;KDELR2	NaN	NaN	NaN	20.2994	17.7952	18.3234	18.7689	NaN	NaN	NaN	NaN	1	1	1	5	5	5	24.844	0.0012275	3.4016	22926000	1
1369	M0R2A0;Q5UCC4-2;Q5UCC4	M0R2A0;Q5UCC4-2;Q5UCC4	ER membrane protein complex subunit 10	EMC10	NaN	18.4102	18.668	NaN	18.6344	NaN	NaN	NaN	NaN	NaN	NaN	2	2	2	7.3	7.3	7.3	38.975	0	15.302	17577000	1
1370	M0R2G0;Q9NT99	M0R2G0;Q9NT99	Leucine-rich repeat-containing protein 4B	LRRC4B	NaN	NaN	18.4654	NaN	19.9866	19.838	NaN	NaN	NaN	NaN	NaN	2	2	2	8	8	8	26.146	0.0079851	2.3144	28056000	1
1371	M0R3F6;M0R2Z9;Q8IX01-4;Q8IX01-3;Q8IX01	M0R3F6;M0R2Z9;Q8IX01-4;Q8IX01-3;Q8IX01	SURP and G-patch domain-containing protein 2	SUGP2	15.4708	20.2603	19.2881	19.0365	20.3296	NaN	16.4033	16.4236	15.6305	17.3111	14.4015	9	9	9	14	14	14	93.859	0	13.215	224600000	11
1372	M0R3C8;Q96T60;M0QX49;M0QYI1;M0QYH2;Q96T60-2	M0R3C8;Q96T60	Bifunctional polynucleotide phosphatase/kinase;Polynucleotide 3-phosphatase;Polynucleotide 5-hydroxyl-kinase	PNKP	NaN	18.1706	18.0412	15.486	18.1192	NaN	NaN	16.1262	NaN	NaN	NaN	3	3	3	10.8	10.8	10.8	49.296	0.00021664	4.1558	33281000	5
1373	O00116;B8ZZ81	O00116	Alkyldihydroxyacetonephosphate synthase, peroxisomal	AGPS	22.3862	22.0998	20.6862	22.2656	20.3375	20.9579	22.1917	22.0031	21.4221	22.3446	22.1027	14	14	14	29.2	29.2	29.2	72.911	0	61.261	1891900000	71
1374	O00139-2;O00139-1;O00139-5;O00139;O00139-4;H0Y8H2;D6R9M0;H0YB64;H0Y5Z9;Q99661-2;Q8N4N8;Q99661	O00139-2;O00139-1;O00139-5;O00139;O00139-4	Kinesin-like protein KIF2A	KIF2A	22.1261	20.8897	21.0488	20.5064	21.6658	20.174	20.6633	19.7055	20.1947	21.0479	17.5817	11	11	11	17	17	17	75.042	0	17.563	982040000	25
1375	O00151	O00151	PDZ and LIM domain protein 1	PDLIM1	25.0726	25.4541	21.4491	23.4913	20.3931	19.738	24.5132	25.3046	24.7094	24.8849	25.2427	16	16	16	67.2	67.2	67.2	36.071	0	228.24	5143400000	133
1376	O00154-6;O00154-4;O00154-7;O00154;O00154-5;K7EKP8;O00154-2;O00154-3	O00154-6;O00154-4;O00154-7;O00154;O00154-5;K7EKP8;O00154-2;O00154-3	Cytosolic acyl coenzyme A thioester hydrolase	ACOT7	23.7468	20.7663	23.2519	22.6569	22.6435	23.1687	22.2118	21.9782	22.6003	23.0041	22.7944	7	7	7	28.9	28.9	28.9	36.567	0	19.241	1493500000	39
1377	O00160;M0QXU2;M0QY89;M0QXU5;M0QXE0	O00160	Unconventional myosin-If	MYO1F	20.3532	19.9841	16.3868	20.2096	13.6087	19.5782	21.7198	20.6336	20.7083	20.4928	21.3063	18	18	14	20.9	20.9	16.7	124.84	0	124.42	1440500000	55
1378	O00165-5;O00165;O00165-2;E9PIQ7;O00165-3;Q5VYD6;O00165-4;O00165-6	O00165-5;O00165;O00165-2;E9PIQ7;O00165-3;Q5VYD6	HCLS1-associated protein X-1	HAX1	20.2264	20.4962	20.5469	19.022	20.742	18.5423	20.8081	17.8314	NaN	20.426	18.766	4	4	4	24.2	24.2	24.2	26.099	0	6.6272	186660000	7
1379	O00170;V9GYQ3;E9PMH2	O00170;V9GYQ3;E9PMH2	AH receptor-interacting protein	AIP	20.7418	20.417	21.5355	20.4216	21.1762	20.7909	20.7193	19.7994	19.9915	21.0802	21.1092	2	2	2	6.4	6.4	6.4	37.636	0.00022482	4.6875	520380000	3
1380	O00178	O00178	GTP-binding protein 1	GTPBP1	NaN	17.4982	19.4223	16.817	18.7056	18.3733	NaN	NaN	NaN	17.1774	17.2417	2	2	2	4.2	4.2	4.2	72.453	0	9.4165	75469000	8
1381	O00182-2;O00182;F8W9W4;J3QS92;J3KSA0;J3QSH0;J3KS82;J3KT17;J3QR96;J3KSY2;Q3B8N2-2;Q6DKI2;Q3B8N2	O00182-2;O00182;F8W9W4	Galectin-9;Galectin	LGALS9	22.082	19.8681	21.3985	21.9607	18.6651	22.2827	22.3716	21.2619	21.2923	21.6731	22.2053	4	4	4	16.4	16.4	16.4	35.888	0	20.36	756750000	21
1382	O00186	O00186	Syntaxin-binding protein 3	STXBP3	22.2155	21.0363	21.0771	20.877	21.3357	22.8949	21.9913	22.2806	21.615	21.9447	21.6293	14	14	14	27.4	27.4	27.4	67.764	0	72.491	1584100000	68
1383	O00194;K7ES41;K7EJ38	O00194	Ras-related protein Rab-27B	RAB27B	23.2727	20.6753	20.7207	21.6077	21.1701	20.7161	23.5082	23.3265	23.4418	23.9142	23.6412	7	5	5	35.8	27.5	27.5	24.608	0	99.507	1172500000	46
1384	O00203-3;O00203;H0YBD0	O00203-3;O00203	AP-3 complex subunit beta-1	AP3B1	20.6499	20.6043	22.6329	20.8	22.2121	20.0217	23.113	20.9106	22.7681	21.5139	20.8408	23	23	19	24.2	24.2	20.2	116.19	0	56.315	2880700000	53
1385	O00214;O00214-2;B1ANM0;Q5T3P9;E9PN19;H7BXD8;F6V2D4;E9PJ77;E9PRN3	O00214;O00214-2;B1ANM0;Q5T3P9;E9PN19;H7BXD8;F6V2D4	Galectin-8;Galectin	LGALS8	19.521	21.3012	18.0498	19.9847	NaN	18.5191	19.8139	18.464	18.823	19.4331	18.8448	4	4	4	11.4	11.4	11.4	35.808	0.00022026	4.3908	185810000	5
1386	O00217;E9PPW7;E9PKH6;E9PN51;F8W9K7;Q08E91	O00217;E9PPW7;E9PKH6;E9PN51;F8W9K7	NADH dehydrogenase [ubiquinone] iron-sulfur protein 8, mitochondrial	NDUFS8	23.3803	22.11	22.8864	22.3261	22.896	21.9594	23.1148	23.3753	22.3993	23.0535	23.0175	6	6	6	34.8	34.8	34.8	23.705	0	33.35	1409400000	117
1387	O00231;O00231-2;J3QRY4;J3QS13	O00231;O00231-2	26S proteasome non-ATPase regulatory subunit 11	PSMD11	21.8732	22.8654	23.6096	22.5213	24.2381	21.7049	23.178	21.6253	22.5296	23.059	22.37	16	16	16	44.8	44.8	44.8	47.463	0	54.586	2927900000	107
1388	O00232;O00232-2;P0C617	O00232;O00232-2	26S proteasome non-ATPase regulatory subunit 12	PSMD12	21.1032	21.7109	22.9089	21.7747	22.3659	20.2977	22.1887	20.5908	21.7005	21.6888	20.8112	14	14	14	34	34	34	52.904	0	47.687	1418600000	83
1389	O00233;J3KN29;F5H5V4;F5GX23;O00233-2;F5H7X1;F5H169;O00233-3	O00233;J3KN29;F5H5V4;F5GX23;O00233-2	26S proteasome non-ATPase regulatory subunit 9	PSMD9	21.8067	22.4331	22.5869	20.2441	22.5232	21.7443	21.2212	21.3942	21.165	20.6632	21.495	6	6	6	30.9	30.9	30.9	24.682	0	15.288	554190000	15
1390	O00264;O00264-2	O00264;O00264-2	Membrane-associated progesterone receptor component 1	PGRMC1	25.793	25.5322	24.6696	24.4906	26.4019	25.1968	24.9086	25.1372	25.2434	24.3003	24.8504	12	10	10	66.2	58.5	58.5	21.671	0	98.253	4934600000	91
1391	O00267-2;O00267;M0QYL9	O00267-2;O00267	Transcription elongation factor SPT5	SUPT5H	18.5239	19.7895	20.407	19.1118	20.4629	17.3454	18.1859	16.8155	17.4333	NaN	19.1715	8	8	8	9.4	9.4	9.4	120.5	0	16.924	381560000	19
1392	O00273;O00273-2;K7ERT1	O00273;O00273-2	DNA fragmentation factor subunit alpha	DFFA	NaN	20.5008	18.8139	19.5288	19.2849	17.8389	18.3616	NaN	NaN	17.3375	NaN	4	4	4	16.3	16.3	16.3	36.521	0	8.7904	78889000	5
1393	O00291-3;V5LU97;O00291;C9JMG5	O00291-3;V5LU97;O00291	Huntingtin-interacting protein 1	HIP1	21.2957	21.0073	20.6447	20.9808	21.4243	20.321	20.889	20.7934	20.2767	21.0373	20.3004	9	9	8	10.9	10.9	9.4	110.66	0	20.264	1313400000	19
1394	O00299	O00299	Chloride intracellular channel protein 1	CLIC1	24.1706	25.1724	23.6967	25.5721	23.9595	24.7783	25.1893	24.3449	24.9453	25.3991	23.2491	15	15	14	81.7	81.7	79.3	26.922	0	86.038	5471700000	153
1395	O00303;H0YDT6;E9PQV8	O00303	Eukaryotic translation initiation factor 3 subunit F	EIF3F	22.2119	22.9041	24.2134	22.1112	23.5869	23.3261	22.7858	22.3647	22.3819	22.7528	22.3512	10	10	10	35	35	35	37.563	0	50.554	1543100000	50
1396	O00330-3;O00330;E9PLU0;E9PRI6;H0YD97;O00330-2	O00330-3;O00330	Pyruvate dehydrogenase protein X component, mitochondrial	PDHX	22.9657	22.2953	22.7365	21.5711	23.1642	21.9217	22.0646	22.5534	23.5573	21.8131	22.9029	15	15	15	39.7	39.7	39.7	51.459	0	44.077	1969000000	64
1397	O00339-3;O00339-2;O00339;H0YBJ4;O00339-4;H0YBF2;H0YBD5;H0YBU5;H0YBN2	O00339-3;O00339-2;O00339;H0YBJ4;O00339-4	Matrilin-2	MATN2	21.1374	19.3222	17.0771	20.0156	19.8173	17.3554	18.8619	19.5801	18.0475	17.9733	19.2671	5	5	5	6.9	6.9	6.9	102.23	0	11.126	345210000	12
1398	O00391-2;O00391;A8MXT8	O00391-2;O00391	Sulfhydryl oxidase 1	QSOX1	NaN	NaN	22.2026	17.8419	23.1431	19.2194	17.1095	NaN	16.1249	15.6439	NaN	14	14	14	29.5	29.5	29.5	66.86	0	37.155	668950000	22
1399	O00400;H7C562;H7C577	O00400;H7C562	Acetyl-coenzyme A transporter 1	SLC33A1	19.2598	20.4829	22.6931	19.6426	22.0792	18.0162	20.3373	18.7635	18.2016	18.893	20.0115	4	4	4	9.1	9.1	9.1	60.908	0	8.6747	431280000	18
1400	O00410;O00410-3;H0Y8C6;O00410-2;E7ETV3;H0Y3V4;C9JMV5;C9JZ53;E7EWK4;E7EX05;E7EQT5;E7EV12;C9JXE0;C9JZD8;C9J875;C9JQT6;E7ESA1;E7ESZ1;E7ETV8;O60518	O00410;O00410-3;H0Y8C6;O00410-2	Importin-5	IPO5	21.0318	21.3109	20.9398	20.6066	21.8693	20.5222	20.1367	16.9748	16.4435	20.3131	16.5375	17	17	17	20.7	20.7	20.7	123.63	0	33.403	1010300000	56
1401	O00425	O00425	Insulin-like growth factor 2 mRNA-binding protein 3	IGF2BP3	16.8481	19.1217	NaN	18.0448	NaN	17.4868	17.3987	17.4115	15.5962	18.7729	17.9366	2	1	1	4.7	2.4	2.4	63.704	0	6.2385	80562000	8
1402	O00442;O00442-2;A6NIC1	O00442;O00442-2	RNA 3-terminal phosphate cyclase	RTCA	24.8849	22.3185	21.4271	26.7684	21.857	22.2425	24.9542	24.6374	25.058	26.2841	24.0579	5	5	5	20.5	20.5	20.5	39.336	0	11.144	7487100000	20
1403	O00443;O00443-2	O00443	Phosphatidylinositol 4-phosphate 3-kinase C2 domain-containing subunit alpha	PIK3C2A	17.427	18.4805	14.6933	16.8507	15.8262	19.7035	16.7358	15.6367	16.1006	18.5229	15.2516	10	10	10	6.8	6.8	6.8	190.68	0	13.084	258420000	13
1404	O00445;O00445-2;K7EJS7;K7EJC4;K7EQ59	O00445;O00445-2	Synaptotagmin-5	SYT5	NaN	21.5419	22.7736	17.5818	23.2049	NaN	NaN	17.3322	NaN	18.6577	NaN	13	13	10	39.9	39.9	32.6	42.9	0	29.067	479020000	24
1405	O00468-6;O00468-7;O00468-3;O00468-5;O00468-4;O00468;A0A087X208;O00468-2;H0Y5U1	O00468-6;O00468-7;O00468-3;O00468-5;O00468-4;O00468;A0A087X208;O00468-2	Agrin;Agrin N-terminal 110 kDa subunit;Agrin C-terminal 110 kDa subunit;Agrin C-terminal 90 kDa fragment;Agrin C-terminal 22 kDa fragment	AGRN	23.2804	22.5145	23.8259	22.9304	24.589	22.5843	22.2969	22.4901	22.7617	22.0427	22.9524	50	50	50	36.5	36.5	36.5	214.84	0	323.31	12113000000	396
1406	O00471;F8W9B8	O00471;F8W9B8	Exocyst complex component 5	EXOC5	19.0403	18.8405	19.1255	18.8191	19.1038	19.768	19.2381	18.2112	18.3379	18.6809	18.4314	6	6	6	9.9	9.9	9.9	81.852	0	11.862	290030000	18
1407	O00478-2;O00478;C9JZT5;C9JUV8;C9JQT8;P78410-3;P78410-2;P78410;C9J877;E9PRR1;E9PFB8;C9JNZ3;S4R3N0;E9PRX1;E7EPR2;C9JVU4;C9J3Q8;E9PJE9	O00478-2;O00478;C9JZT5;C9JUV8	Butyrophilin subfamily 3 member A3	BTN3A3	20.7364	NaN	22.1454	16.4076	22.3897	21.7342	17.6568	20.8151	18.723	NaN	NaN	9	9	4	18.1	18.1	8	59.687	0	21.918	614510000	19
1408	O00483	O00483	Cytochrome c oxidase subunit NDUFA4	NDUFA4	25.6568	25.0099	25.1773	24.5819	25.4118	24.618	23.6348	24.8781	23.2989	23.4482	23.5954	3	3	3	37	37	37	9.3697	0	27.269	2164700000	49
1409	O00487	O00487	26S proteasome non-ATPase regulatory subunit 14	PSMD14	21.8473	22.9372	23.9078	22.1293	23.141	23.5557	22.4128	21.3122	21.6134	23.2499	22.2277	9	9	9	33.9	33.9	33.9	34.577	0	23.383	1456800000	50
1410	O00505;H0Y4S9	O00505	Importin subunit alpha-4	KPNA3	19.9025	20.5076	21.3785	20.1136	21.2673	19.6665	20.1868	18.0384	19.4318	19.8618	19.4979	5	5	4	14	14	11.1	57.81	0	10.402	280360000	11
1411	O00519;A0A087WYA0	O00519	Fatty-acid amide hydrolase 1	FAAH	18.0847	22.3011	21.3229	21.4209	22.0118	16.166	18.1407	19.1093	16.7699	18.4171	16.8953	12	12	12	32	32	32	63.065	0	26.064	465280000	43
1412	O00534;B4DHS6;O00534-3;O00534-2;O00534-4	O00534;B4DHS6;O00534-3;O00534-2	von Willebrand factor A domain-containing protein 5A	VWA5A	21.0904	18.4595	21.6325	19.4484	21.5956	21.7927	18.4843	17.9355	17.6078	19.5133	16.9139	18	18	18	33.7	33.7	33.7	86.488	0	50.918	697380000	44
1413	O00560-3;O00560;B4DHN5;E9PBU7	O00560-3;O00560;B4DHN5;E9PBU7	Syntenin-1	SDCBP	21.8906	20.747	22.0965	22.8033	22.3062	23.5807	21.5077	19.4892	21.5908	20.5228	21.2651	6	6	1	29.8	29.8	6.2	31.761	0	83.263	980280000	66
1414	O00562-2;O00562;E9PMZ6;E9PMS0;E9PSD1	O00562-2;O00562	Membrane-associated phosphatidylinositol transfer protein 1	PITPNM1	18.4435	NaN	16.9636	NaN	17.2929	17.1048	16.563	18.1053	17.8204	16.9235	18.2179	4	4	4	4.9	4.9	4.9	134.77	0	5.6517	125130000	10
1415	O00566;U3KQ48	O00566;U3KQ48	U3 small nucleolar ribonucleoprotein protein MPP10	MPHOSPH10	17.3657	18.6885	18.7096	17.1093	16.9058	14.23	15.8972	18.1636	NaN	17.5948	NaN	2	2	2	5.4	5.4	5.4	78.863	0.0079792	2.3103	71394000	3
1416	O00567;Q5JXT2;H0YDU4;H0Y653	O00567;Q5JXT2	Nucleolar protein 56	NOP56	23.7458	25.5991	24.546	24.8795	25.2752	22.7009	23.3337	24.8493	23.0843	24.1547	23.2782	23	23	23	42.9	42.9	42.9	66.049	0	223.31	9315000000	184
1417	O00571;O00571-2;O15523-3;C9J081;C9J8G5;A0A087WVZ1;A0A087WX09;B4DLA0;D6RCM4;Q9NQI0-3;Q9NQI0-2;Q9NQI0-4;Q9NQI0	O00571;O00571-2	ATP-dependent RNA helicase DDX3X	DDX3X	23.9295	23.6204	23.9071	23.2193	23.8278	26.3626	22.9535	23.6338	23.0213	23.605	23.7858	25	24	4	43.2	41.5	7.7	73.243	0	193.11	9438300000	247
1418	O00592-2;O00592	O00592-2;O00592	Podocalyxin	PODXL	22.3866	21.0664	21.5894	20.5631	22.2833	22.2364	20.4814	21.1505	21.0208	19.9556	20.8899	4	4	4	8.6	8.6	8.6	55.385	0	29.735	906200000	24
1419	O00625	O00625	Pirin	PIR	17.0881	21.7116	18.2908	21.3081	20.6496	20.4937	17.8913	15.0631	16.4707	15.9117	16.6751	4	4	4	18.6	18.6	18.6	32.113	0	6.875	172490000	9
1420	O00629;H7C4F6	O00629	Importin subunit alpha-3	KPNA4	20.3207	20.0731	20.572	19.817	20.5882	20.1668	19.7576	NaN	17.2731	19.3979	17.3005	3	2	2	8.1	5.2	5.2	57.886	0	19.451	193230000	9
1421	O00743-2;O00743;O00743-3;Q5T1S7	O00743-2;O00743;O00743-3	Serine/threonine-protein phosphatase 6 catalytic subunit;Serine/threonine-protein phosphatase 6 catalytic subunit, N-terminally processed	PPP6C	20.153	21.2752	21.3939	17.7644	21.6611	22.886	21.6031	20.1854	19.8347	21.0467	20.5668	8	8	8	35	35	35	32.532	0	23.602	577410000	29
1422	O00764;F2Z2Y4;O00764-2;O00764-3;A8MV33	O00764;F2Z2Y4;O00764-2;O00764-3	Pyridoxal kinase	PDXK	22.3798	23.0771	22.1883	22.1482	22.1661	22.5715	22.8566	21.1849	22.4819	22.5606	20.2799	7	7	7	30.4	30.4	30.4	35.102	0	39.564	1170300000	40
1423	O14494;O14494-2	O14494;O14494-2	Lipid phosphate phosphohydrolase 1	PPAP2A	22.4317	21.9751	18.757	19.9281	NaN	NaN	20.992	22.4576	21.3001	21.0643	22.3416	3	3	3	15.5	15.5	15.5	32.156	0	7.9081	347900000	7
1424	O14495	O14495	Lipid phosphate phosphohydrolase 3	PPAP2B	23.2272	20.5773	20.9233	20.6392	21.8574	23.3506	19.2805	21.4038	20.3147	18.7814	20.9195	4	4	4	15.8	15.8	15.8	35.116	0	9.9172	568300000	16
1425	O14497-2;O14497;H0Y488;O14497-3;H0YCU6;A0A087WUV6	O14497-2;O14497;H0Y488;O14497-3	AT-rich interactive domain-containing protein 1A	ARID1A	15.9731	17.439	17.8914	17.9849	18.4308	NaN	14.9624	16.9876	NaN	NaN	NaN	5	5	5	3.4	3.4	3.4	218.33	0	8.0292	119200000	8
1426	O14498;H0YN67;H0YL90	O14498;H0YN67;H0YL90	Immunoglobulin superfamily containing leucine-rich repeat protein	ISLR	20.1346	NaN	19.2018	NaN	22.9307	19.7118	NaN	16.4678	19.3244	16.2656	17.196	5	5	5	17.8	17.8	17.8	45.997	0	13.731	201590000	15
1427	O14521;H0YD41;G3V173;E9PK73;H3BRW5;O14521-2;O14521-4;H0YD96;O14521-3	O14521;H0YD41;G3V173;E9PK73;H3BRW5;O14521-2;O14521-4	Succinate dehydrogenase [ubiquinone] cytochrome b small subunit, mitochondrial	SDHD	25.1353	24.3117	24.4503	23.1219	24.4695	24.0002	23.7643	24.1819	24.3901	24.0038	23.5437	3	3	3	17.6	17.6	17.6	17.043	0	20.003	1604000000	18
1428	O14523;O14523-2;E9PK05	O14523;O14523-2;E9PK05	C2 domain-containing protein 2-like	C2CD2L	NaN	16.7567	17.4237	17.3963	18.6749	NaN	16.8199	16.6117	15.8488	16.3927	17.088	2	2	2	4.5	4.5	4.5	76.18	0.0051331	2.5829	50885000	2
1429	O14530-2;O14530;F8WBV5;G3XAJ4;F8WCJ3;B8ZZX4	O14530-2;O14530;F8WBV5;G3XAJ4;F8WCJ3;B8ZZX4	Thioredoxin domain-containing protein 9	TXNDC9	NaN	NaN	NaN	NaN	NaN	20.4641	NaN	NaN	NaN	NaN	NaN	2	2	2	10.6	10.6	10.6	22.199	0.00021882	4.2849	20251000	2
1430	O14531	O14531	Dihydropyrimidinase-related protein 4	DPYSL4	17.7201	NaN	NaN	NaN	15.8788	17.8815	NaN	NaN	NaN	NaN	NaN	1	1	1	3.3	3.3	3.3	61.877	0.0042178	2.6571	22203000	2
1431	O14548;E5RJZ1;H0YBD2;E5RFH8	O14548;E5RJZ1;H0YBD2	Cytochrome c oxidase subunit 7A-related protein, mitochondrial	COX7A2L	24.172	23.5162	23.2102	23.9241	23.4056	23.2123	22.6972	23.1587	22.6621	22.4989	22.5358	5	5	5	62.3	62.3	62.3	12.615	0	17.269	978740000	34
1432	O14558;K7EP04	O14558;K7EP04	Heat shock protein beta-6	HSPB6	24.9912	20.2911	21.7301	23.9933	19.4596	25.4026	21.9514	20.5981	21.8611	22.1785	22.2405	7	7	7	76.9	76.9	76.9	17.135	0	85.491	979500000	25
1433	O14561;I3L505;H3BNK3	O14561;I3L505;H3BNK3	Acyl carrier protein, mitochondrial;Acyl carrier protein	NDUFAB1	25.4537	25.4434	26.3655	24.2666	26.5692	24.6917	26.3825	25.2927	26.5662	26.0911	25.6068	4	4	4	19.2	19.2	19.2	17.417	0	16.867	7078700000	69
1434	U3KQU4;O14569	U3KQU4;O14569	Cytochrome b561 domain-containing protein 2	CYB561D2	NaN	NaN	NaN	NaN	NaN	NaN	NaN	NaN	NaN	NaN	NaN	1	1	1	24	24	24	5.212	0.0042308	2.6838	0	1
1435	O14576-3;O14576-5;O14576-2;O14576;C9J3E7;E5RJ75;O14576-4;E5RFE1	O14576-3;O14576-5;O14576-2;O14576;C9J3E7;E5RJ75;O14576-4	Cytoplasmic dynein 1 intermediate chain 1	DYNC1I1	NaN	NaN	20.2989	16.0442	20.4536	NaN	NaN	NaN	NaN	NaN	NaN	3	3	3	8.6	8.6	8.6	68.575	0	37.206	61458000	4
1436	O14617-4;O14617;O14617-5;O14617-3;O14617-2;K7ELX8	O14617-4;O14617;O14617-5;O14617-3;O14617-2	AP-3 complex subunit delta-1	AP3D1	21.4426	20.5829	22.7257	20.9347	22.2168	20.8613	21.4463	20.7386	20.7922	21.4235	20.6544	19	19	15	23.2	23.2	18.7	114.71	0	54.752	1806200000	63
1437	O14647-2;O14647;O14646-2;O14646	O14647-2;O14647	Chromodomain-helicase-DNA-binding protein 2	CHD2	NaN	NaN	15.8415	NaN	NaN	NaN	NaN	16.349	NaN	18.2685	NaN	3	3	2	1.8	1.8	1.3	200.56	0.00021482	4.0472	43506000	3
1438	O14656	O14656	Torsin-1A	TOR1A	NaN	18.0357	19.8186	17.4017	18.3462	NaN	19.1791	18.0156	NaN	18.9273	19.6059	2	2	2	6	6	6	37.808	0.0014147	3.2657	85624000	1
1439	O14672;O14672-2;H0YNC5	O14672;O14672-2	Disintegrin and metalloproteinase domain-containing protein 10	ADAM10	23.0723	21.4457	22.1036	21.9761	22.608	21.6025	23.5676	23.0023	23.1936	23.6549	23.4259	14	14	14	26.9	26.9	26.9	84.141	0	108.55	4145200000	103
1440	O14681-3;O14681;E9PLB8;E9PL33;B7ZB74;E9PM05;E9PS58;E9PK61	O14681-3;O14681;E9PLB8;E9PL33;B7ZB74;E9PM05;E9PS58;E9PK61	Etoposide-induced protein 2.4 homolog	EI24	20.0821	18.1574	NaN	19.4997	NaN	17.3632	19.1535	20.5411	19.5475	18.5975	18.7606	2	2	2	6.7	6.7	6.7	37.461	0.0051311	2.5799	99264000	3
1441	O14733;O14733-4;O14733-3;O14733-2	O14733;O14733-4;O14733-3;O14733-2	Dual specificity mitogen-activated protein kinase kinase 7	MAP2K7	NaN	NaN	NaN	NaN	NaN	20.5417	NaN	NaN	NaN	NaN	NaN	3	3	3	8.6	8.6	8.6	47.484	0	10.913	39687000	4
1442	O14744-2;O14744;O14744-3;O14744-5;O14744-4;G3V580;G3V5L5;G3V2L6;C9JSX3;H0YJX6;H0YJ77;G3V5T6;H0YJD3;G3V2X6	O14744-2;O14744;O14744-3;O14744-5;O14744-4;G3V580	Protein arginine N-methyltransferase 5;Protein arginine N-methyltransferase 5, N-terminally processed	PRMT5	21.394	21.0877	20.8492	20.8034	21.1067	21.184	20.16	18.7662	19.4255	20.1886	19.137	9	9	9	16.6	16.6	16.6	71.319	0	16.388	725330000	26
1443	O14745;J3QRP6;O14745-2;J3QRA3	O14745;J3QRP6;O14745-2	Na(+)/H(+) exchange regulatory cofactor NHE-RF1	SLC9A3R1	24.4309	23.8708	20.0125	23.1816	21.1477	22.2384	24.1046	24.4611	25.305	24.4355	23.4634	21	21	20	55	55	55	38.868	0	132.13	4754500000	114
1444	O14773;O14773-2;E7EV34	O14773;O14773-2	Tripeptidyl-peptidase 1	TPP1	25.1823	24.4247	27.0027	24.7835	26.5543	24.4656	25.0398	24.8497	24.6737	25.0485	24.6782	16	16	16	46.7	46.7	46.7	61.247	0	319.28	16063000000	194
1445	O14776-2;O14776;G3V220	O14776-2;O14776;G3V220	Transcription elongation regulator 1	TCERG1	19.2569	20.8776	20.9781	19.9638	20.5634	19.1413	19.0217	20.794	19.1796	20.2864	20.4204	12	12	11	12.1	12.1	11.1	121.69	0	26.192	764190000	34
1446	O14787-2;A0A075B780;O14787;K7ESC1	O14787-2;A0A075B780;O14787	Transportin-2	TNPO2	19.0675	19.1567	20.0813	18.8818	19.9815	19.7724	18.4972	17.9102	15.2731	17.8598	17.7792	12	8	8	18.5	14.2	14.2	100.41	0	12.129	256780000	18
1447	O14791-3;O14791;O14791-2	O14791-3;O14791;O14791-2	Apolipoprotein L1	APOL1	20.3873	20.2706	NaN	NaN	NaN	NaN	20.3983	NaN	NaN	NaN	NaN	1	1	1	3.9	3.9	3.9	42.158	0	8.4419	76350000	2
1448	O14792	O14792	Heparan sulfate glucosamine 3-O-sulfotransferase 1	HS3ST1	NaN	NaN	21.6512	NaN	21.578	NaN	NaN	NaN	NaN	NaN	NaN	4	4	4	15	15	15	35.773	0	8.1767	122060000	6
1449	O14807	O14807	Ras-related protein M-Ras	MRAS	19.048	17.3064	NaN	18.0499	NaN	20.5749	NaN	NaN	NaN	NaN	20.1007	3	3	3	25.5	25.5	25.5	23.846	0.0014161	3.2793	73512000	4
1450	O14818;O14818-2;H0Y586;O14818-4;Q8TAA3-2;Q8TAA3-5;Q8TAA3;A0A087WYS6;F5GY34	O14818;O14818-2;H0Y586;O14818-4;Q8TAA3-2;Q8TAA3-5;Q8TAA3	Proteasome subunit alpha type-7;Proteasome subunit alpha type-7-like	PSMA7;PSMA8	23.7715	24.7232	24.5082	23.9532	25.1016	23.959	24.6877	23.0461	23.7435	23.9448	23.0281	10	10	10	44.8	44.8	44.8	27.887	0	75.713	3518300000	96
1451	O14828;O14828-2	O14828;O14828-2	Secretory carrier-associated membrane protein 3	SCAMP3	22.6824	21.07	22.6668	21.9508	21.9169	20.6461	22.4763	21.9236	22.175	22.0603	22.3407	4	4	4	17	17	17	38.287	0	71.501	735580000	14
1452	Q5VV89;O14880;Q5VV87	Q5VV89;O14880;Q5VV87	Microsomal glutathione S-transferase 3	MGST3	25.9898	24.509	25.5163	25.0057	25.6668	24.4018	25.5765	24.0421	25.4762	24.0964	26.1703	4	4	4	30.1	30.1	30.1	18.416	0	154.94	3768600000	180
1453	O14896;O14896-2;B1AJU4	O14896;O14896-2;B1AJU4	Interferon regulatory factor 6	IRF6	21.6274	21.937	14.969	21.7325	NaN	17.1907	22.7577	22.1708	21.7589	22.728	22.486	7	7	7	19.3	19.3	19.3	53.129	0	79.06	899400000	34
1454	O14907;A0A087X282	O14907	Tax1-binding protein 3	TAX1BP3	23.007	22.8963	21.2744	22.9044	21.0194	23.5882	23.5201	23.3773	22.8661	24.1377	23.8121	4	4	4	44.4	44.4	44.4	13.735	0	45.523	777900000	30
1455	O14908;O14908-2;K7EM11;K7ESN1;K7ELJ2;K7EJ33;K7EIT0;A0A087X028;Q9NZT2-2;Q9NZT2	O14908	PDZ domain-containing protein GIPC1	GIPC1	21.6504	19.7823	19.6097	20.3877	20.9107	21.3873	21.6016	21.6256	22.2203	22.4585	21.3867	9	9	9	40.5	40.5	40.5	36.049	0	32.914	560040000	30
1456	O14910;H0YIA8;H0YI92;J3KN23	O14910;H0YIA8;H0YI92	Protein lin-7 homolog A	LIN7A	19.5229	NaN	21.7539	NaN	21.3674	22.8475	NaN	NaN	NaN	NaN	NaN	7	3	3	36.9	14.2	14.2	25.996	0.00022578	4.7547	203600000	6
1457	O14920-4;O14920-2;O14920;G3V105;E5RGW5;O14920-3	O14920-4;O14920-2;O14920	Inhibitor of nuclear factor kappa-B kinase subunit beta	IKBKB	17.5927	16.6207	17.688	NaN	17.4915	19.1553	17.417	17.8306	17.6453	NaN	17.8641	5	5	5	7.7	7.7	7.7	79.508	0	10.558	123970000	8
1458	O14925;Q5SRD1;B4DDK6	O14925;Q5SRD1;B4DDK6	Mitochondrial import inner membrane translocase subunit Tim23;Putative mitochondrial import inner membrane translocase subunit Tim23B	TIMM23;TIMM23B	21.5695	18.9797	NaN	19.6943	20.4438	NaN	21.6355	20.5984	21.2548	19.8501	21.2629	2	2	2	12.9	12.9	12.9	21.943	0	22.743	175800000	15
1459	O14933-2;O14933	O14933-2;O14933	Ubiquitin/ISG15-conjugating enzyme E2 L6	UBE2L6	NaN	19.1105	NaN	18.4366	NaN	21.1284	18.363	NaN	NaN	NaN	NaN	1	1	1	17.2	17.2	17.2	10.086	0.00082799	3.5372	14201000	1
1460	O14936-3;O14936-4;O14936-6;O14936-2;O14936;Q5JS74;Q5JS72;O14936-5;Q5JS79	O14936-3;O14936-4;O14936-6;O14936-2;O14936;Q5JS74	Peripheral plasma membrane protein CASK	CASK	23.3431	21.7605	22.2805	21.3935	23.0303	21.6848	22.8465	22.7982	22.5638	21.8664	21.8372	25	25	25	29.8	29.8	29.8	102.11	0	59.189	3334600000	122
1461	O14939-4;O14939;O14939-3;I3L222;I3L1F3;I3L4R5;I3L381;I3L3I7	O14939-4;O14939;O14939-3	Phospholipase D2	PLD2	19.308	NaN	NaN	16.6579	18.9452	18.9828	25.2066	18.0638	17.7563	NaN	15.6126	6	6	6	9.4	9.4	9.4	104.66	0	28.195	2439000000	15
1462	O14949	O14949	Cytochrome b-c1 complex subunit 8	UQCRQ	27.2025	26.3817	25.522	26.2058	25.761	25.3547	26.9131	26.9715	26.9001	26.7864	26.926	5	5	5	45.1	45.1	45.1	9.9062	0	45.76	7149500000	68
1463	O14964;O14964-2;I3L1P5;I3L1E3;I3L165	O14964;O14964-2;I3L1P5	Hepatocyte growth factor-regulated tyrosine kinase substrate	HGS	20.9962	21.3035	22.1481	21.1375	21.2944	20.4444	21.1604	21.3591	19.8808	21.4872	21.4227	9	9	9	11.1	11.1	11.1	86.191	0	31.363	883350000	34
1464	O14967;O14967-2;D6RAZ4	O14967	Calmegin	CLGN	NaN	NaN	21.5744	NaN	21.8492	NaN	NaN	NaN	NaN	NaN	NaN	9	8	8	16.9	15.9	15.9	70.038	0	27.261	248430000	16
1465	O14974-5;O14974-4;O14974-3;O14974;O14974-2;H0YHL8;F8VZN8;F8VW28;H0YIM2;H0YIS3	O14974-5;O14974-4;O14974-3;O14974;O14974-2;H0YHL8;F8VZN8	Protein phosphatase 1 regulatory subunit 12A	PPP1R12A	22.0236	21.6128	21.4923	20.9789	21.0014	22.168	22.4711	22.2798	21.6016	21.9291	22.7083	7	7	7	8.4	8.4	8.4	105.64	0	31.279	2579600000	24
1466	O14975-2;O14975;G3V1R7	O14975-2;O14975;G3V1R7	Very long-chain acyl-CoA synthetase	SLC27A2	17.7636	NaN	23.652	NaN	22.9794	16.9549	22.0091	18.8389	20.1191	21.0117	20.0978	13	13	13	25.4	25.4	25.4	64.615	0	48.311	1018600000	32
1467	O14976;O14976-2	O14976;O14976-2	Cyclin-G-associated kinase	GAK	NaN	16.542	18.7482	18.455	NaN	18.6866	15.0823	NaN	14.9398	NaN	NaN	4	4	4	2.9	2.9	2.9	143.19	0	5.1471	103400000	6
1468	O14979-3;O14979-2;A0A087WU03	O14979-3;O14979-2	Heterogeneous nuclear ribonucleoprotein D-like	HNRNPDL	NaN	17.4211	17.5073	18.3517	NaN	NaN	NaN	NaN	NaN	NaN	NaN	11	1	1	40.2	7.4	7.4	27.191	0.0074585	2.3683	11141000	2
1469	O14980;C9JKM9;C9IZS4;C9JQ02;C9JV99;C9J673;C9IYM2;F8WF71;C9JF49;H7BZC5	O14980	Exportin-1	XPO1	20.9354	22.8097	22.4449	22.4161	22.9392	20.925	21.6144	21.3273	20.4044	21.3359	20.5874	26	26	26	30.1	30.1	30.1	123.38	0	75.168	2560400000	95
1470	O15020-2;O15020;A4QPE4;E9PJZ2;Q96T49-2;Q96T49	O15020-2;O15020	Spectrin beta chain, non-erythrocytic 2	SPTBN2	21.7289	19.2509	20.8611	21.9154	21.1099	19.5051	21.4815	22.3309	22.3064	21.4189	21.1802	61	50	50	30	25.5	25.5	268.31	0	267.03	5026300000	169
1471	O15031;A6QRG9;A0A087WU36;E2PU09;A6QRH1;H0Y6J7;H0YAM9;REV__S4R400;REV__Q5VW36;Q9Y4D7	O15031	Plexin-B2	PLXNB2	22.7998	21.8617	21.2976	21.728	21.996	22.2367	22.2761	22.0339	21.9472	21.5303	21.2377	37	37	36	23.9	23.9	23.5	205.12	0	260.56	4940700000	175
1472	O15042-2;O15042;E7ET15;O15042-3;C9JB80;E7EW00;H0Y8D9;H7C4V2	O15042-2;O15042;E7ET15;O15042-3;C9JB80	U2 snRNP-associated SURP motif-containing protein	U2SURP	20.6942	21.9029	21.9219	20.6644	22.2034	18.7973	19.7012	20.9237	19.4602	19.8118	20.5871	12	12	12	16.4	16.4	16.4	118.23	0	35.138	1153800000	41
1473	O15047	O15047	Histone-lysine N-methyltransferase SETD1A	SETD1A	NaN	16.5814	NaN	NaN	NaN	NaN	NaN	NaN	NaN	NaN	NaN	2	2	2	1.8	1.8	1.8	186.03	0.00042096	3.7653	7845100	2
1474	O15061;O15061-2;A0A075B7B1;H0YL34;O15061-3;C9JIE4	O15061;O15061-2;A0A075B7B1	Synemin	SYNM	24.2224	17.7304	18.4576	19.9337	17.2806	25.7328	14.9685	17.5582	19.556	20.6191	17.6438	49	49	49	35.8	35.8	35.8	172.77	0	323.31	7902000000	131
1475	O15069	O15069	NAC-alpha domain-containing protein 1	NACAD	NaN	NaN	18.4526	NaN	19.5121	NaN	NaN	NaN	NaN	NaN	NaN	3	3	3	3.1	3.1	3.1	161.1	0	4.849	39832000	4
1476	O15075-2;O15075;Q5VZY9;O15075-3;O15075-4	O15075-2;O15075;Q5VZY9	Serine/threonine-protein kinase DCLK1	DCLK1	22.7982	17.2482	18.8219	18.5583	20.5137	25.1852	NaN	NaN	NaN	NaN	NaN	17	17	14	22.9	22.9	19.6	81.099	0	67.655	1982300000	44
1477	O15091-4;O15091-2;O15091;O15091-3	O15091-4;O15091-2;O15091	Mitochondrial ribonuclease P protein 3	KIAA0391	16.7458	17.6859	15.6777	NaN	16.6644	NaN	15.7208	15.6157	14.9541	14.9479	15.2311	3	3	3	6.6	6.6	6.6	56.486	0.00042292	3.8248	21858000	7
1478	O15111	O15111	Inhibitor of nuclear factor kappa-B kinase subunit alpha	CHUK	NaN	NaN	17.8536	NaN	16.7832	18.3387	NaN	NaN	14.7005	15.5884	17.2847	4	4	4	7.4	7.4	7.4	84.639	0	6.4926	50895000	2
1479	O15117;O15117-2;O15117-3	O15117;O15117-2;O15117-3	FYN-binding protein	FYB	17.6355	16.4098	16.4844	NaN	16.036	16.079	17.3304	NaN	15.8068	NaN	17.0313	1	1	1	1.5	1.5	1.5	85.386	0.0012265	3.3916	43643000	4
1480	O15118;K7EQ23;O15118-2	O15118;K7EQ23;O15118-2	Niemann-Pick C1 protein	NPC1	19.7075	19.1036	19.7814	20.8458	19.5397	18.6274	19.9884	18.3915	18.3259	19.0743	16.829	6	6	6	5	5	5	142.17	0	18.994	448270000	19
1481	O15121	O15121	Sphingolipid delta(4)-desaturase DES1	DEGS1	19.9749	20.1335	20.9538	19.6198	20.6802	19.3502	19.7766	19.315	18.8863	19.1737	19.3626	2	2	2	10.2	10.2	10.2	37.866	0	6.4444	153890000	8
1482	O15126;A0A087WXB0;O15126-2;A0A087WZA6;A0A087WTX8;A0A087WU14	O15126;A0A087WXB0;O15126-2;A0A087WZA6	Secretory carrier-associated membrane protein 1	SCAMP1	24.2248	22.8052	23.4067	23.3058	23.8925	21.286	23.1744	22.996	23.232	22.5449	22.8343	6	6	6	34.6	34.6	34.6	37.92	0	41.329	2130800000	41
1483	O15127;H3BV04;H3BN93;H3BUB6;H3BPL9	O15127;H3BV04;H3BN93;H3BUB6;H3BPL9	Secretory carrier-associated membrane protein 2	SCAMP2	24.6675	22.8481	23.0546	23.4397	23.178	23.3151	25.0003	22.3777	24.4489	23.2671	23.8176	4	4	4	12.2	12.2	12.2	36.648	0	40.039	1780600000	31
1484	O15143;C9J4Z7;F8VXW2;C9JEY1;C9JQM8;C9JFG9;C9J6C8;C9JBJ7;C9K057;C9JTT6;C9JM51;F8WEB3	O15143	Actin-related protein 2/3 complex subunit 1B	ARPC1B	25.5185	24.7133	23.9564	25.0834	23.9217	24.0482	25.9255	25.5676	25.7162	26.3997	25.3159	15	15	14	54.6	54.6	48.4	40.949	0	323.31	9624300000	165
1485	O15144;H7C3F9;C9JTV5;G5E9J0;G5E9S7	O15144	Actin-related protein 2/3 complex subunit 2	ARPC2	25.722	25.3925	24.7524	25.8829	24.7326	25.2227	26.655	25.7593	26.1752	26.3816	25.1846	16	16	16	52	52	52	34.333	0	203.2	15596000000	216
1486	O15145;C9JZD1;F8VR50	O15145;C9JZD1	Actin-related protein 2/3 complex subunit 3	ARPC3	25.5629	25.4818	25.0072	25.4893	24.5048	25.4022	25.8434	25.2192	25.6038	26.1227	24.6845	8	8	8	52.8	52.8	52.8	20.546	0	43.971	6420800000	117
1487	O15173;O15173-2;U3KQM0;D3DNX8	O15173;O15173-2	Membrane-associated progesterone receptor component 2	PGRMC2	25.8822	25.5738	26.5536	24.6419	26.9966	25.3571	25.9583	25.5829	25.8669	25.5067	25.1817	12	12	10	45.3	45.3	42.6	23.818	0	106.12	8909000000	94
1488	O15211;O15211-2;A2AB89;Q12967-3;Q12967-4;Q12967-6;Q12967-5;Q12967	O15211;O15211-2;A2AB89	Ral guanine nucleotide dissociation stimulator-like 2	RGL2	NaN	NaN	NaN	NaN	21.6947	19.3707	NaN	NaN	NaN	21.4484	NaN	4	4	4	5.5	5.5	5.5	83.548	0	5.2108	263490000	4
1489	O15212;A2AB88	O15212;A2AB88	Prefoldin subunit 6	PFDN6	20.9891	20.6137	22.2638	20.0634	21.5166	20.3479	21.2017	20.0301	19.9195	20.4572	20.437	4	4	4	32.6	32.6	32.6	14.582	0.00022691	4.8352	293140000	6
1490	O15213;H0Y6G3	O15213	WD repeat-containing protein 46	WDR46	16.6099	18.2536	NaN	NaN	16.6347	NaN	NaN	18.1622	15.3159	16.0502	NaN	3	3	3	6.4	6.4	6.4	68.07	0.0016035	3.177	29321000	1
1491	O15228-2;O15228;Q5TBH8;Q5TBH6	O15228-2;O15228;Q5TBH8	Dihydroxyacetone phosphate acyltransferase	GNPAT	18.7351	17.485	17.4276	17.3229	18.079	18.5667	18.717	17.8869	16.8011	17.3975	18.4965	3	3	3	7.4	7.4	7.4	69.906	0	10.061	148030000	3
1492	O15230;A0A087WYH7;REV__G3V211	O15230	Laminin subunit alpha-5	LAMA5	23.9624	23.2597	25.2586	23.1847	25.7858	24.1185	23.0487	23.226	23.5917	21.9749	23.1109	107	107	105	38.6	38.6	38.1	399.73	0	323.31	43593000000	902
1493	O15231;O15231-6;O15231-4;O15231-7;O15231-8;O15231-5;H7BZT5;O15231-9;H7C1R1	O15231;O15231-6;O15231-4;O15231-7;O15231-8;O15231-5;H7BZT5	Zinc finger protein 185	ZNF185	NaN	18.6421	NaN	17.6114	NaN	NaN	NaN	18.1184	17.4773	NaN	NaN	23	1	1	48.6	2.2	2.2	73.525	0.00082747	3.5308	51666000	3
1494	O15231-3;H0Y704;O15231-2	O15231-3;H0Y704;O15231-2	Zinc finger protein 185	ZNF185	23.2212	23.6633	17.266	22.5409	15.8806	16.0447	22.8924	23.5986	23.5022	22.7545	23.1339	23	23	1	48.7	48.7	2.3	73.612	0	243.93	3748800000	100
1495	O15232-2;O15232	O15232-2;O15232	Matrilin-3	MATN3	NaN	NaN	NaN	19.259	NaN	NaN	NaN	NaN	NaN	NaN	NaN	1	1	1	2.5	2.5	2.5	48.316	0.0036687	2.7386	16940000	1
1496	O15240;Q05BJ3	O15240;Q05BJ3	Neurosecretory protein VGF;Neuroendocrine regulatory peptide-1;Neuroendocrine regulatory peptide-2;Antimicrobial peptide VGF[554-577]	VGF	21.6187	17.2774	21.784	NaN	21.3733	19.889	NaN	NaN	NaN	NaN	NaN	6	6	6	12.5	12.5	12.5	67.257	0	23.773	617540000	20
1497	O15254-2;O15254;D6RJ89	O15254-2;O15254	Peroxisomal acyl-coenzyme A oxidase 3	ACOX3	20.5732	19.7012	19.6659	16.9882	19.0555	NaN	21.0863	18.4344	15.7809	21.0517	18.0674	5	5	5	12.5	12.5	12.5	69.574	0	8.2119	403730000	11
1498	Q9P0H9;O15258;Q5T092;Q5T091;Q5T093	Q9P0H9;O15258;Q5T092;Q5T091	Protein RER1	RER1	23.8581	22.9447	23.6083	23.5115	22.7533	22.4972	24.2556	22.6662	23.5427	24.0279	23.0401	7	7	7	34.1	34.1	34.1	24.817	0	47.123	1692700000	35
1499	Q5T8U5;O15260;O15260-2;O15260-3;B7Z1G8	Q5T8U5;O15260;O15260-2;O15260-3;B7Z1G8	Surfeit locus protein 4	SURF4	25.6513	24.9736	25.8804	25.3871	25.9549	24.1101	26.0337	25.882	25.3356	25.8365	25.87	6	6	6	35.5	35.5	35.5	21.127	0	125.89	5682900000	274
1500	O15269;O15269-2	O15269	Serine palmitoyltransferase 1	SPTLC1	22.2733	20.6824	20.3874	21.0353	20.4251	NaN	21.0987	22.4733	21.1033	20.7825	21.3855	8	8	8	16.1	16.1	16.1	52.743	0	14.479	742870000	19
1501	O15270;H0YJV2	O15270;H0YJV2	Serine palmitoyltransferase 2	SPTLC2	19.2759	18.4535	18.0933	15.2331	17.9119	16.2379	19.6739	20.0394	17.9937	19.3293	18.8183	5	5	5	12.3	12.3	12.3	62.924	0	30.24	194810000	22
1502	O15355	O15355	Protein phosphatase 1G	PPM1G	NaN	18.6107	18.8311	18.6302	18.6532	NaN	NaN	16.7798	NaN	NaN	17.5978	2	2	2	6	6	6	59.271	0.00021964	4.339	53879000	2
1503	O15371-2;O15371-3;O15371;B0QYA4	O15371-2;O15371-3;O15371	Eukaryotic translation initiation factor 3 subunit D	EIF3D	20.6376	21.6943	22.4064	21.0022	22.4635	21.001	21.1366	21.5721	20.6312	21.2994	18.5151	10	10	6	28.7	28.7	14.8	58.14	0	47.795	810130000	33
1504	O15382;B3KSI3;M0QXF9;M0QZ10;O15382-2;M0QZP4;M0R2K7	O15382;B3KSI3;M0QXF9;M0QZ10;O15382-2;M0QZP4	Branched-chain-amino-acid aminotransferase, mitochondrial;Branched-chain-amino-acid aminotransferase	BCAT2	23.5553	23.8944	22.4911	23.6593	23.8656	19.4756	23.921	24.2082	23.9076	23.4124	23.6434	15	15	15	45.4	45.4	45.4	44.287	0	257.41	3118500000	105
1505	O15400-2;O15400	O15400-2;O15400	Syntaxin-7	STX7	23.8331	22.8875	23.3585	22.7089	22.8654	21.8775	23.3987	22.9759	22.8398	23.054	22.6875	5	5	5	25.5	25.5	25.5	27.4	0	58.103	1342800000	44
1506	O15427;J3QQS9;J3QQV2;J3QSC3;J3KT83;J3QRA0;J3QLE3;J3KTM6;J3QRU2;J3KTI8;J3QRP8	O15427;J3QQS9;J3QQV2;J3QSC3;J3KT83;J3QRA0	Monocarboxylate transporter 4	SLC16A3	23.5371	21.6819	NaN	22.4026	NaN	22.1628	22.9137	22.9138	23.0094	22.8021	22.4503	6	6	6	15.3	15.3	15.3	49.469	0	14.018	1251300000	43
1507	O15438;O15438-4;O15438-2;O15438-5;H0Y9T4;H0Y8Q6;O15438-3	O15438;O15438-4;O15438-2	Canalicular multispecific organic anion transporter 2	ABCC3	19.3263	NaN	NaN	NaN	17.4784	18.421	19.103	19.5298	15.4525	NaN	NaN	9	8	8	8.1	7.6	7.6	169.34	0	15.348	185620000	11
1508	O15439-2;O15439;O15439-3;B7Z3Q7	O15439-2;O15439	Multidrug resistance-associated protein 4	ABCC4	17.9105	19.0093	16.3885	18.3087	17.0252	16.0414	16.8462	18.3843	14.6359	NaN	16.0134	5	4	4	3.6	3.1	3.1	144.2	0	5.179	156370000	7
1509	O15446;O15446-2	O15446;O15446-2	DNA-directed RNA polymerase I subunit RPA34	CD3EAP	NaN	19.1606	NaN	NaN	NaN	NaN	NaN	NaN	NaN	NaN	NaN	1	1	1	4.7	4.7	4.7	54.985	0.001601	3.1467	12307000	1
1510	O15455;O15455-2;D6RA51	O15455;O15455-2	Toll-like receptor 3	TLR3	18.6481	20.2591	17.4224	17.4472	NaN	17.7981	19.3817	19.1736	NaN	15.3527	18.0962	7	7	7	9.4	9.4	9.4	103.83	0	9.3776	188380000	9
1511	O15460-2;O15460;C9JX45;A8MXE0;E7ERI1;E7ENX0;E7EPI9;C9JCP0;C9JN43;C9JIG4;C9JFJ1	O15460-2;O15460	Prolyl 4-hydroxylase subunit alpha-2	P4HA2	21.3555	22.8699	21.1938	23.8126	20.6077	19.3873	22.2731	22.0546	20.4361	23.1961	23.1788	15	15	15	37	37	37	60.632	0	104	2095600000	65
1512	O15498;O15498-2	O15498;O15498-2	Synaptobrevin homolog YKT6	YKT6	20.7958	18.9172	20.8997	19.8377	19.0937	20.0128	20.1066	18.7138	18.4555	20.1793	19.6277	3	3	3	21.7	21.7	21.7	22.417	0.00082576	3.4994	153770000	4
1513	O15511;O15511-2;B1ALC0	O15511;O15511-2;B1ALC0	Actin-related protein 2/3 complex subunit 5	ARPC5	24.0647	23.478	23.0968	22.5202	23.0478	22.1143	24.5589	22.9552	23.8666	24.2274	23.3568	4	3	3	29.8	24.5	24.5	16.32	0	18.251	1848100000	43
1514	O15519-14;O15519-8;O15519-5;O15519-11;O15519;C9JSU3;C9J4Q0;C9JV51;C9J408;F8WBH9;E9PAP3;O15519-13;O15519-2;O15519-4;O15519-9;O15519-12;O15519-10;O15519-7;O15519-3;O15519-15;O15519-6	O15519-14;O15519-8;O15519-5;O15519-11;O15519;C9JSU3;C9J4Q0;C9JV51;C9J408;F8WBH9;E9PAP3;O15519-13;O15519-2;O15519-4;O15519-9;O15519-12;O15519-10;O15519-7;O15519-3;O15519-15;O15519-6	CASP8 and FADD-like apoptosis regulator;CASP8 and FADD-like apoptosis regulator subunit p43;CASP8 and FADD-like apoptosis regulator subunit p12	CFLAR	NaN	NaN	NaN	NaN	NaN	19.6068	NaN	NaN	NaN	NaN	NaN	2	2	2	7.8	7.8	7.8	49.777	0.001228	3.4088	19162000	2
1515	O15540;O15540-2	O15540;O15540-2	Fatty acid-binding protein, brain	FABP7	20.5829	NaN	NaN	NaN	19.751	23.8479	NaN	NaN	NaN	NaN	NaN	1	1	1	13.6	13.6	13.6	14.889	0	44.22	208710000	2
1516	O15551;O14493;O95484;P56747	O15551	Claudin-3	CLDN3	NaN	19.0157	21.5095	21.3502	22.2501	NaN	20.2486	20.704	NaN	19.5583	18.925	3	3	3	19.1	19.1	19.1	23.318	0	11.63	107810000	5
1517	O15554;M0R2F1;M0QZ70;M0R1J0;D1MQ08	O15554;M0R2F1;M0QZ70;M0R1J0;D1MQ08	Intermediate conductance calcium-activated potassium channel protein 4	KCNN4	NaN	NaN	NaN	NaN	NaN	NaN	17.2749	17.218	17.5794	15.8828	16.2137	2	2	2	6.3	6.3	6.3	47.695	0.0016019	3.1601	14153000	4
1518	O43143	O43143	Pre-mRNA-splicing factor ATP-dependent RNA helicase DHX15	DHX15	22.7323	23.4545	23.2213	22.8648	23.8034	20.8098	21.6006	22.4661	21.4116	21.9599	21.8713	24	24	23	36.4	36.4	35.2	90.932	0	80.478	3484200000	123
1519	O43147-5;O43147;O43147-2;V9GYJ0	O43147-5;O43147;O43147-2;V9GYJ0	Small G protein signaling modulator 2	SGSM2	NaN	NaN	18.2032	NaN	18.395	NaN	NaN	NaN	NaN	NaN	NaN	4	4	4	4.7	4.7	4.7	110.86	0	6.7442	34265000	7
1520	O43157-2;O43157;O43157-3	O43157-2;O43157	Plexin-B1	PLXNB1	20.3063	17.1705	NaN	17.5341	NaN	20.4164	NaN	18.679	18.4777	18.6128	18.2943	12	12	12	9	9	9	214.41	0	48.906	388540000	15
1521	O43159;E9PPP6;E9PPY3	O43159;E9PPP6	Ribosomal RNA-processing protein 8	RRP8	NaN	18.642	16.9618	15.939	18.3039	18.3191	20.7415	17.778	NaN	NaN	16.9161	3	3	3	8.1	8.1	8.1	50.714	0.0014196	3.3043	90497000	2
1522	O43166-3;O43166-2;O43166;F5GYF8;H0YJY2	O43166-3;O43166-2;O43166;F5GYF8;H0YJY2	Signal-induced proliferation-associated 1-like protein 1	SIPA1L1	16.5957	17.5561	16.5796	17.2003	15.7712	NaN	17.9612	18.5091	17.1753	16.9973	18.5107	4	3	3	3.1	2.4	2.4	197.41	0.0042089	2.6399	214870000	2
1523	O43172-2;O43172	O43172-2;O43172	U4/U6 small nuclear ribonucleoprotein Prp4	PRPF4	19.8451	20.971	21.8866	20.6583	21.9284	16.6687	19.3752	20.2703	15.9523	19.3143	19.9038	7	7	7	19.2	19.2	19.2	58.32	0	15.419	505170000	16
1524	O43173;K7EQB3;H0Y405;P61647	O43173	Sia-alpha-2,3-Gal-beta-1,4-GlcNAc-R:alpha 2,8-sialyltransferase	ST8SIA3	NaN	NaN	22.5494	16.6315	23.1114	NaN	NaN	NaN	NaN	NaN	NaN	13	13	13	35.5	35.5	35.5	43.969	0	29.35	382540000	21
1525	O43175;Q5SZU1	O43175;Q5SZU1	D-3-phosphoglycerate dehydrogenase	PHGDH	23.4618	25.1957	22.7008	24.8158	23.4202	24.0774	17.8503	21.0158	16.7573	16.3035	16.8188	14	14	14	35.3	35.3	35.3	56.65	0	90.364	3221000000	102
1526	O43181;H0Y9M8	O43181;H0Y9M8	NADH dehydrogenase [ubiquinone] iron-sulfur protein 4, mitochondrial	NDUFS4	25.3032	24.1887	24.8576	24.2979	25.2139	24.5523	24.8705	25.6561	25.3088	24.8521	23.153	4	4	4	20.6	20.6	20.6	20.108	0	6.4757	4075200000	42
1527	O43237;O43237-2;B4E2E0;J3KRI4;H3BUM4;J3KRZ2	O43237;O43237-2;B4E2E0	Cytoplasmic dynein 1 light intermediate chain 2	DYNC1LI2	21.9532	21.5819	22.8233	21.0992	23.2039	22.6937	21.0288	20.266	19.5225	21.0645	20.2803	14	14	13	39.4	39.4	36.8	54.099	0	58.342	1333800000	62
1528	O43240;M0R132	O43240	Kallikrein-10	KLK10	NaN	16.7099	NaN	25.0112	NaN	NaN	17.613	NaN	NaN	NaN	NaN	8	8	8	37.7	37.7	37.7	30.17	0	52.308	443610000	11
1529	O43242;O43242-2;H0YGV8;F5H8K4	O43242;O43242-2	26S proteasome non-ATPase regulatory subunit 3	PSMD3	21.5879	23.3848	23.478	22.8638	23.9188	22.018	22.7579	21.8765	22.1191	22.8277	22.2582	22	22	22	43.1	43.1	43.1	60.977	0	60.329	3332300000	128
1530	O43264;O43264-2;F5H3C1	O43264;O43264-2	Centromere/kinetochore protein zw10 homolog	ZW10	18.5254	18.3893	18.5355	18.4942	19.8364	17.6172	18.8945	18.355	18.7183	18.1123	17.5211	6	6	6	13	13	13	88.828	0	14.212	222360000	33
1531	O43278;H3BVD9;O43278-2;H3BR01;H3BTQ8;H3BMB6;H3BNW5;H3BSM2	O43278;H3BVD9;O43278-2;H3BR01;H3BTQ8;H3BMB6	Kunitz-type protease inhibitor 1	SPINT1	20.6576	20.9108	17.8604	21.8448	19.464	NaN	22.2104	21.6871	21.6768	22.8128	20.9553	8	8	8	17	17	17	58.397	0	15.084	762750000	22
1532	O43290;E9PQI8	O43290	U4/U6.U5 tri-snRNP-associated protein 1	SART1	18.5451	21.1197	21.3412	20.045	21.0309	NaN	NaN	17.5311	NaN	18.4081	16.7686	7	7	7	11.1	11.1	11.1	90.254	0	19.833	386020000	16
1533	O43291;K7EKQ0;K7EM91;O43291-2;K7ES27;K7ESI5;K7EQZ3	O43291;K7EKQ0;K7EM91;O43291-2	Kunitz-type protease inhibitor 2	SPINT2	20.0824	20.7677	21.5028	21.4038	22.7752	NaN	21.2394	20.2468	20.9668	21.5804	20.2661	3	3	3	12.7	12.7	12.7	28.228	0	6.9926	337820000	7
1534	O43292;E9PLV6;E9PPZ9;O43292-2;E9PLG8;E9PM11;E9PQ31;E9PM94	O43292;E9PLV6;E9PPZ9;O43292-2	Glycosylphosphatidylinositol anchor attachment 1 protein	GPAA1	21.1365	21.7288	20.115	21.5877	22.0149	20.7074	22.1825	21.8131	21.7145	21.4076	21.4043	5	5	5	8.1	8.1	8.1	67.622	0	6.0906	781180000	21
1535	O43294-2;O43294;H3BQC4	O43294-2;O43294	Transforming growth factor beta-1-induced transcript 1 protein	TGFB1I1	18.2449	16.0015	17.4801	18.8434	18.9204	19.827	16.897	16.8071	17.231	14.2917	19.1735	4	4	4	13.3	13.3	13.3	47.941	0	6.9087	115100000	17
1536	O43301;K7ENF6;K7ELE6	O43301	Heat shock 70 kDa protein 12A	HSPA12A	21.5063	15.3369	20.4704	NaN	20.9632	23.4336	16.153	17.4741	17.2293	16.4246	NaN	16	16	14	27.6	27.6	24.6	74.977	0	40.186	838590000	29
[truncated: 3,943 more rows]
