# Supplementary material for: In-depth Proteomic Profiling Captures Subtype-specific Features of Craniopharyngiomas
Source: Research Square preprint supplement (doi:10.21203/rs.3.rs-666783/v1), 2021-07-07
Supplement: Supplementary file 2 [file db75e9e8416174be21efaea3.xlsx]

## Sheet: Supplementary Table 1
Supplementary Table 1. Clinical and mutational information of study subjects
No	Age	Gender	Height (cm)	Weight (kg)	BMI (kg/m2)	Maximal tumor size (cm)	Tumor volume (cm3)	3rd ventricle invasion
ACP1	56.7041	Men	157.5	52.9	21.3253	1.4	1.176	Absence
ACP2	65.0932	Men	171.1	70.4	24.0476	2	1.87	Presence
ACP3	76.7562	Women	153.7	59.7	25.2712	3.5	10.465	Presence
ACP4	44.989	Women	160.4	65.2	25.3419	2.1	1.512	Absence
ACP5	23.6411	Men	172	77.6	26.2304	3.3	4.455	Presence
ACP6	32.7644	Women	146.2	49.6	23.2053	2.2	3.96	Presence
PCP1	74.5151	Women	152.9	57.6	24.6381	2.4	5.544	Absence
PCP2	61.2521	Women	168	67.2	23.8095	3.8	12.54	Presence
PCP3	52.4411	Men	164.7	66.1	24.3677	2.6	3.744	Presence
PCP4	25.3014	Men	173	77.15	25.7777	3.7	13.875	Presence
PCP5	32.8055	Women	157.6	77.95	31.3837	3.6	17.28	Presence
