# Supplementary material for: In-depth Proteomic Profiling Captures Subtype-specific Features of Craniopharyngiomas
Source: Research Square preprint supplement (doi:10.21203/rs.3.rs-666783/v1), 2021-07-07
Supplement: Supplementary file 3 [file f3edd8c2f143dec23f4bdb46.xlsx]

## Sheet: Supplementary Table 4
Supplementary Table 4. Results of 1D annotation analysis in label-free quantification set
GO type	GO ID	P-value	Size	Score	Benj. Hoch. FDR	Mean	Median
GOCC	GO:0016021	3.02309e-09	328	-0.221086	2.28848e-06	-1.03222	-1.32327
GOCC	GO:0031224	7.1992e-09	337	-0.213891	2.7249e-06	-1.00313	-1.30875
GOCC	GO:0005829	1.20786e-08	306	0.217297	3.04782e-06	0.310465	0.848635
GOBP	GO:0016070	3.55657e-08	123	0.302661	0.000190526	0.79623	1.43882
GOBP	GO:0016071	5.36534e-08	43	0.487702	0.000143711	1.57262	1.7533
GOCC	GO:0043005	9.49182e-08	73	0.372007	1.79633e-05	1.23661	1.70318
GOBP	GO:0006139	1.06358e-07	202	0.236421	0.00018992	0.454136	1.15551
GOBP	GO:0090304	1.27351e-07	146	0.269088	0.000170555	0.652798	1.31893
GOBP	GO:0034641	1.99755e-07	266	0.208161	0.000214017	0.340039	1.05885
GOCC	GO:0043234	2.19275e-07	357	0.188257	3.31983e-05	0.171746	-0.748464
GOCC	GO:0032991	2.52448e-07	419	0.179431	3.18505e-05	0.113006	-0.770095
GOCC	GO:0005654	2.54057e-07	179	0.240855	2.74745e-05	0.539604	1.22966
GOCC	GO:0044428	4.92633e-07	255	0.204464	4.66154e-05	0.352287	1.10543
GOCC	GO:0044430	2.62736e-06	136	0.246807	0.00022099	0.593749	0.741633
GOBP	GO:0009607	2.74532e-06	58	-0.364363	0.00245111	-1.60155	-2.00057
GOBP	GO:0006397	2.81875e-06	29	0.508404	0.00215715	1.72196	1.8085
GOBP	GO:0006396	4.23341e-06	46	0.399283	0.0028348	1.27436	1.67976
GOBP	GO:0032963	4.66197e-06	20	-0.596342	0.00227038	-2.33466	-2.27657
GOBP	GO:0044236	4.66197e-06	20	-0.596342	0.00249742	-2.33466	-2.27657
GOBP	GO:0044259	4.66197e-06	20	-0.596342	0.00277491	-2.33466	-2.27657
GOBP	GO:0006807	5.96703e-06	282	0.177531	0.00266378	0.245915	0.964647
GOBP	GO:0044243	7.44922e-06	19	-0.598356	0.00285039	-2.34977	-2.42475
GOBP	GO:0030574	7.44922e-06	19	-0.598356	0.00306965	-2.34977	-2.42475
GOBP	GO:0008380	8.63584e-06	27	0.500062	0.00308414	1.7028	1.8085
GOBP	GO:0010467	9.04911e-06	65	0.326797	0.00302976	0.876998	1.36694
GOBP	GO:0022617	9.11782e-06	20	-0.577805	0.00287319	-2.28261	-2.25051
GOBP	GO:0000375	1.11514e-05	18	0.602582	0.00298689	2.13397	2.05057
GOBP	GO:0000377	1.11514e-05	18	0.602582	0.00331877	2.13397	2.05057
GOBP	GO:0000398	1.11514e-05	18	0.602582	0.0031441	2.13397	2.05057
GOBP	GO:0007626	1.57269e-05	18	0.592254	0.00401186	2.45743	2.40749
GOCC	GO:0031226	2.1539e-05	74	-0.294286	0.00163051	-1.3963	-1.75801
GOBP	GO:0007610	2.15976e-05	32	0.439494	0.00525902	1.64014	2.01764
GOBP	GO:0044057	2.2948e-05	39	0.397999	0.00534488	1.44852	1.91961
GOMF	GO:0005201	3.47336e-05	13	-0.666751	0.0497038	-2.6074	-2.63735
GOBP	GO:0042742	3.5175e-05	20	-0.538736	0.00785136	-2.28292	-2.56715
GOBP	GO:0009888	3.54903e-05	56	-0.326723	0.00760486	-1.39904	-2.01868
GOBP	GO:0022402	3.56933e-05	61	0.31362	0.0073542	0.933862	1.30125
GOBP	GO:0043062	3.58567e-05	50	-0.344689	0.00686016	-1.4975	-1.88886
GOBP	GO:0030198	3.58567e-05	50	-0.344689	0.00711424	-1.4975	-1.88886
GOBP	GO:0032496	3.77665e-05	23	-0.501014	0.00697638	-2.2847	-2.37263
GOMF	GO:0003723	3.95937e-05	66	0.300411	0.0283293	0.833122	1.37369
GOCC	GO:0005581	4.62144e-05	14	-0.632518	0.00318039	-2.43319	-2.39869
GOCC	GO:0044424	5.61299e-05	1069	0.200552	0.00354086	-0.251039	-1.00329
GOBP	GO:0051707	6.5966e-05	43	-0.357824	0.0117793	-1.53918	-1.99426
GOBP	GO:0007399	6.6356e-05	20	0.519451	0.0114668	1.75898	1.96343
GOCC	GO:0005887	7.28036e-05	70	-0.282047	0.00423941	-1.35547	-1.74317
GOBP	GO:0009617	7.9828e-05	23	-0.479638	0.0133637	-2.06578	-2.20695
GOCC	GO:0005634	8.51394e-05	269	0.156679	0.00460361	0.139375	0.767843
GOBP	GO:0051171	9.02377e-05	168	0.187858	0.0146486	0.429275	1.10596
GOCC	GO:0033267	9.30334e-05	14	0.606759	0.00469508	2.30208	2.61612
GOBP	GO:0000278	9.4247e-05	27	0.438932	0.0148494	1.37649	1.45505
GOBP	GO:0044237	0.000102702	635	0.128395	0.0157193	-0.128463	-0.86179
GOBP	GO:0032774	0.000104663	77	0.263797	0.0155745	0.711395	1.43882
GOBP	GO:0022411	0.000113127	78	-0.260934	0.015948	-1.2317	-1.58708
GOBP	GO:0071845	0.000113127	78	-0.260934	0.016379	-1.2317	-1.58708
GOBP	GO:0002237	0.000129262	24	-0.455796	0.0177553	-2.10723	-2.35686
GOCC	GO:0044425	0.000141964	495	-0.128022	0.00671669	-0.706049	-1.16189
GOBP	GO:0030030	0.000170119	47	0.323021	0.0227832	0.944315	1.20913
GOCC	GO:0030424	0.00019605	25	0.434658	0.00873	1.52548	1.73334
GOBP	GO:0007017	0.000198228	44	0.330018	0.0259002	1.03922	1.17093
GOCC	GO:0044297	0.000268608	39	0.342516	0.0112965	1.04233	1.39598
GOBP	GO:0003006	0.000299285	25	-0.422037	0.0381731	-1.93282	-2.14913
GOBP	GO:0009987	0.000311886	1019	0.15972	0.0388552	-0.23479	-0.989714
GOBP	GO:0044265	0.000324522	49	0.30275	0.0395106	0.895609	1.56317
GOBP	GO:0006112	0.000350162	19	0.477444	0.0416848	2.01835	1.32806
GOBP	GO:0070647	0.000362428	33	0.363484	0.0422071	1.22132	1.57531
GOBP	GO:0010975	0.000381043	29	0.385664	0.042526	1.32696	1.49279
GOBP	GO:0045664	0.000381043	29	0.385664	0.0434308	1.32696	1.49279
GOBP	GO:0070126	0.000408638	36	-0.345362	0.0446749	-1.70118	-1.59727
GOBP	GO:0051173	0.000419439	63	0.263574	0.0449387	0.772099	1.32806
GOBP	GO:0050804	0.000453744	17	0.494683	0.047661	2.03667	2.27996
GOCC	GO:0005583	0.000488551	8	-0.714403	0.0194649	-2.70745	-2.73674
GOCC	GO:0044463	0.000508707	73	0.242335	0.0192546	0.74227	1.14901
GOCC	GO:0043025	0.000642196	33	0.347899	0.0231496	1.0597	1.39598
GOCC	GO:0070013	0.00080111	119	-0.186823	0.0275655	-1.17191	-1.24077
GOCC	GO:0072562	0.000843407	24	0.397484	0.0277591	1.28102	1.6623
GOCC	GO:0042995	0.000895215	119	0.185102	0.0282366	0.429443	-0.658213
GOCC	GO:0005874	0.0010219	39	0.308732	0.0309433	0.922209	1.10831
GOCC	GO:0005882	0.00110446	12	0.546656	0.0321568	3.16621	4.44556
GOCC	GO:0005578	0.00126067	22	-0.400727	0.0353453	-1.64189	-2.2706
GOCC	GO:0045202	0.00147148	23	0.386667	0.0397826	1.31346	1.73334
